# Supplementary material for: Roles of plasma proteins in mediating the causal effect of the lipid species on gastric cancer and exploring potential drug targets for gastric cancer：insights from proteomic and two-step mendelian randomization and macromolecular docking
Source: Research Square preprint supplement (doi:10.21203/rs.3.rs-4574875/v1), 2024-07-16
Supplement: Supplementary file 1 [file 0436e96f2a5a4617dc57119f.xlsx]

## Sheet: Sheet1
The SMR results between decode proteins and gastric cancer
probeID	ProbeChr	Gene	Probe_bp	topSNP	topSNP_chr	topSNP_bp	A1	A2	Freq	b_GWAS	se_GWAS	p_GWAS	b_eQTL	se_eQTL	p_eQTL	b_SMR	se_SMR	p_SMR	p_SMR_multi	p_HEIDI	nsnp_HEIDI	p_SMR_fdr
ENSG00000179403	1	VWA1	1438872	rs2031708	1	1550696	A	G	0.0198807	-0.0536225	0.023972	0.0252939	-1.0748	0.02287	0	0.0498907	0.0223289	0.0254598	0.0306738	0.0462507	11	0.0453342
ENSG00000008130	1	NADK	1765844	rs4648629	1	1764023	A	C	0.420477	-0.0453896	0.0196384	0.0208182	-0.124	0.0081108	9.15795e-53	0.366045	0.160174	0.0222954	0.00963395	0.572037	20	0.0453342
ENSG00000244038	1	DDOST	20656656	rs818194	1	20605335	T	A	0.792247	-0.0479266	0.0202509	0.0179505	0.0829	0.00938802	1.043e-18	-0.578125	0.252903	0.0222565	0.0368701	0.0267308	20	0.0453342
ENSG00000142669	1	SH3BGRL3	26280804	rs55876635	1	26360502	A	G	0.442346	0.0389258	0.017876	0.02944	0.115	0.00815704	3.89295e-45	0.338485	0.157287	0.0313954	0.201737	0.111861	20	0.0453342
ENSG00000116157	1	GPX7	52605711	rs7527068	1	52610953	G	A	0.840954	-0.0586929	0.0234116	0.012176	-0.7111	0.009407	0	0.0825382	0.0329412	0.0122235	0.0125049	0.437629	18	0.0423886
ENSG00000163518	1	FCRL4	157585916	rs6667963	1	157585088	C	G	0.26839	-0.0388864	0.0183142	0.0337295	-0.7029	0.005315	0	0.0553229	0.0260586	0.0337524	0.125468	0.320916	20	0.0453342
ENSG00000132703	1	APCS	159588346	rs146174215	1	159574733	C	A	0.0188867	-0.173572	0.0612847	0.00462255	-0.5373	0.0235417	2.69206e-115	0.323045	0.114935	0.00494392	0.0924844	0.0788427	7	0.0379034
ENSG00000162896	1	PIGR	206937494	rs748844	1	206936501	A	G	0.442346	-0.0455733	0.018844	0.0155866	-0.1423	0.00839913	2.19601e-64	0.320262	0.133767	0.0166574	0.0266409	0.0454085	20	0.0453342
ENSG00000123838	1	C4BPA	207124602	rs2808466	1	207100406	C	T	0.140159	0.0518951	0.0193321	0.00726598	0.4921	0.010956	0	0.105456	0.039355	0.00737058	0.00200654	0.598975	9	0.0418073
ENSG00000153574	2	RPIA	88721301	rs112008468	2	88710596	G	A	0.0874751	0.146295	0.0620921	0.0184682	0.2083	0.012912	1.513e-58	0.702327	0.301252	0.0197343	0.0979259	0.330206	20	0.0453342
ENSG00000115594	2	IL1R1	102122209	rs6706048	2	102138349	C	G	0.297217	0.0364264	0.0171353	0.0335188	-0.1891	0.00900858	7.9102e-98	-0.19263	0.0910783	0.0344304	0.456611	0.0189819	20	0.0453342
ENSG00000163083	2	INHBB	120348970	rs17050272	2	120548864	A	G	0.450298	0.0359449	0.0167632	0.0320105	0.3414	0.006851	0	0.105287	0.0491467	0.0321696	0.159405	0.915434	20	0.0453342
ENSG00000153246	2	PLA2R1	159997310	rs3749117	2	160028931	C	T	0.474155	0.0347705	0.0170507	0.0414258	-0.7646	0.004756	0	-0.0454755	0.022302	0.0414422	0.00325925	0.193918	20	0.0493792
ENSG00000198643	3	FAM3D	58650390	rs12493131	3	58664251	G	T	0.879722	0.0623351	0.0240374	0.00950735	0.4529	0.015112	2.44706e-197	0.137635	0.0532728	0.00977761	0.0481729	0.326474	12	0.0421195
ENSG00000114021	3	NIT2	100348187	rs1486308	3	100374210	G	T	0.33002	-0.0384401	0.0185887	0.0386465	-0.0986	0.0092421	1.428e-26	0.389859	0.192035	0.0423418	0.151551	0.83527	20	0.0493792
ENSG00000091986	3	CCDC80	112623164	rs9845240	3	112655985	A	G	0.366799	-0.0623638	0.0170371	0.00025175	0.0937	0.00848106	2.23801e-28	-0.665569	0.191546	0.000511382	0.00133676	0.0575344	14	0.0283844
ENSG00000163902	3	RPN1	128650522	rs2253144	3	128611077	G	A	0.636183	-0.0376471	0.01688	0.0257285	-0.1483	0.0080325	4.13793e-76	0.253858	0.114651	0.0268158	0.0236462	0.167148	20	0.0453342
ENSG00000163710	3	PCOLCE2	142852564	rs2707982	3	142885634	A	G	0.678926	0.0412723	0.0170672	0.0155966	0.3238	0.008628	3.10352e-308	0.127462	0.0528184	0.0158124	0.928569	0.0439936	19	0.0453342
ENSG00000134962	4	KLB	39429232	rs13103023	4	39455997	A	G	0.32008	0.0435576	0.0171898	0.0112794	-0.5484	0.006433	0	-0.0794268	0.0313593	0.0113155	0.126535	0.298527	20	0.0423886
ENSG00000145623	5	OSMR	38895727	rs77326070	5	39039653	G	A	0.611332	0.0421989	0.0177746	0.0175914	0.1159	0.0084098	3.29198e-43	0.364097	0.155621	0.0193021	0.234516	0.777614	20	0.0453342
ENSG00000039537	5	C6	41201777	rs403624	5	41253751	G	A	0.0874751	-0.0554547	0.0210456	0.00841412	0.2846	0.0152389	7.77318e-78	-0.194851	0.0746802	0.00907693	3.76058e-06	0.0262585	19	0.0418073
ENSG00000164307	5	ERAP1	96784455	rs34750	5	96807103	C	G	0.718688	-0.0375244	0.0168129	0.0256228	-1.0306	0.004173	0	0.0364103	0.0163144	0.0256289	0.0310436	0.519314	20	0.0453342
ENSG00000145730	5	PAM	102891856	rs26522	5	103148695	A	G	0.318091	0.0338318	0.016765	0.0435904	-0.4818	0.005878	0	-0.0702196	0.0348071	0.0436541	0.157257	0.064398	20	0.0493792
ENSG00000145779	5	TNFAIP8	119334190	rs1035376	5	119312555	A	G	0.89662	-0.383017	0.192912	0.0470947	0.2207	0.0108365	3.32505e-92	-1.73546	0.878236	0.0481458	0.393282	0.0621788	20	0.0496534
ENSG00000169567	5	HINT1	131189926	rs72803745	5	131111657	C	A	0.220676	-0.0601089	0.0226608	0.00798855	0.0957	0.00962047	2.58498e-23	-0.628098	0.245064	0.0103773	0.0103773	0.512678	20	0.0421195
ENSG00000204388	6	HSPA1B	31828996	rs151005270	6	32634097	T	C	0.249503	-0.0658742	0.018982	0.00051977	0.0592	0.00847688	2.875e-12	-1.11274	0.358048	0.00188487	2.38305e-05	0.0155377	20	0.0296349
ENSG00000204248	6	COL11A2	33177590	rs9277841	6	33136895	A	G	0.464215	-0.0380818	0.0170087	0.0251585	0.1835	0.00831636	6.86497e-108	-0.20753	0.0931665	0.0259125	1.39467e-08	0.0479544	20	0.0453342
ENSG00000112667	6	DNPH1	43227555	rs144767533	6	43218400	C	T	0.0805169	0.276207	0.102643	0.00712497	-0.1574	0.0137766	3.12902e-30	-1.75481	0.669959	0.00881163	0.0153566	0.150949	20	0.0418073
ENSG00000118503	6	TNFAIP3	137875264	rs5029939	6	137874586	G	C	0.0238569	0.0705888	0.032226	0.0284929	0.3992	0.025471	2.32501e-55	0.176826	0.081511	0.0300563	0.101479	0.104141	10	0.0453342
ENSG00000154978	7	VOPP1	55504522	rs112497301	7	55464183	C	T	0.0139165	0.89176	0.362899	0.0139975	-0.4223	0.0502485	4.30699e-17	-2.11168	0.895319	0.0183453	0.13302	0.0497883	5	0.0453342
ENSG00000169919	7	GUSB	65971450	rs28536622	7	65712685	G	C	0.369781	0.0339051	0.0169842	0.045904	0.1152	0.00839612	7.64104e-43	0.294315	0.148984	0.0482142	0.396615	0.0240017	11	0.0496534
ENSG00000160862	7	AZGP1	99971381	rs2525546	7	99954321	T	C	0.281312	-0.0611032	0.0200686	0.00232901	-0.2378	0.008863	1.41907e-158	0.256952	0.0849345	0.00248389	0.0210102	0.11318	20	0.0296349
ENSG00000085514	7	PILRA	100383813	rs1476679	7	100406823	T	C	0.700795	0.0452324	0.018129	0.0125949	-1.2742	0.003726	0	-0.0354986	0.0142282	0.0125973	0.0868335	0.0216707	20	0.0423886
ENSG00000171711	8	DEFB4A	7895696	rs79180029	8	8614423	C	T	0.0308151	0.161973	0.0736262	0.0278111	-0.3816	0.032708	1.88201e-31	-0.424458	0.196341	0.0306303	0.229104	0.333669	12	0.0453342
ENSG00000131203	8	IDO1	39915532	rs6474193	8	39916080	T	C	0.338966	-0.04926	0.0235178	0.0362081	0.0585	0.00845201	4.47099e-12	-0.842052	0.420019	0.0449852	0.0449852	0.0116153	12	0.0495517
ENSG00000104331	8	BPNT2	56975899	rs77649702	8	56886114	A	G	0.0417495	0.0733785	0.0337051	0.0294752	-0.7845	0.022651	7.71662e-263	-0.0935354	0.0430486	0.0297966	0.261206	0.423471	13	0.0453342
ENSG00000008513	8	ST3GAL1	133513387	rs11776026	8	133488665	A	G	0.336978	0.0563691	0.0185614	0.00239026	-0.2162	0.00876176	1.96501e-134	-0.260727	0.0865008	0.00257695	0.184118	0.478477	13	0.0296349
ENSG00000197646	9	PDCD1LG2	5540906	rs16923189	9	5510644	G	A	0.302187	-0.0696529	0.0211525	0.000991612	0.347	0.007393	0	-0.200729	0.0611079	0.00102047	0.453892	0.0165174	20	0.0283844
ENSG00000095380	9	NANS	98069904	rs7874696	9	98055746	A	T	0.223658	0.0589633	0.0207225	0.00443597	0.1025	0.00932208	4.02101e-28	0.575252	0.208831	0.00587581	0.0410174	0.5406	20	0.0405431
ENSG00000148218	9	ALAD	113393801	rs1800435	9	113391611	G	C	0.082505	-0.0729031	0.0310766	0.0189804	-0.4172	0.014596	1.08765e-179	0.174744	0.0747389	0.0193844	0.33698	0.420338	13	0.0453342
ENSG00000106804	9	C5	121004091	rs1035029	9	120980540	A	G	0.615308	-0.0396149	0.0192436	0.0395322	0.1156	0.00852292	6.59797e-42	-0.342689	0.168373	0.0418212	0.0528895	0.0219357	20	0.0493792
ENSG00000165661	9	QSOX2	136226072	rs10858248	9	136216478	G	A	0.467197	0.0364052	0.0170787	0.0330389	-0.3346	0.005823	0	-0.108802	0.0510774	0.0331596	0.00904081	0.252454	20	0.0453342
ENSG00000138308	10	PLA2G12B	72944784	rs7898735	10	72952788	C	T	0.0755467	0.0611145	0.0209301	0.00350106	-0.1489	0.0138266	4.81697e-27	-0.41044	0.14564	0.0048297	0.03088	0.0345423	20	0.0379034
ENSG00000138207	10	RBP4	93596716	rs17108978	10	93588270	A	G	0.291252	-0.0576155	0.0274128	0.035573	-0.066	0.00907356	3.49301e-13	0.872962	0.432336	0.0434692	0.0434692	0.552809	5	0.0493792
ENSG00000138175	10	ARL3	102694064	rs12764388	10	102653628	A	G	0.112326	-0.0865923	0.0343494	0.0117046	0.2125	0.0140769	1.72999e-51	-0.407493	0.163883	0.0129009	0.0477314	0.0311409	20	0.0423886
ENSG00000076685	10	NT5C2	103182395	rs11191421	10	102863296	G	C	0.251491	-0.0643859	0.0323657	0.0466654	0.1141	0.00924062	5.01502e-35	-0.564293	0.287319	0.0495303	0.272299	0.0605324	20	0.049855
ENSG00000167325	11	RRM1	4116820	rs11031142	11	4153145	T	C	0.549702	-0.0365638	0.0167688	0.0292224	-0.055	0.00811256	1.205e-11	0.664797	0.320267	0.0379165	0.0379165	0.0146067	20	0.047568
ENSG00000175868	11	CALCB	14993670	rs10766205	11	15070774	A	G	0.762425	-0.0370377	0.0185374	0.0457171	0.2492	0.008738	6.78869e-179	-0.148626	0.0745701	0.0462494	0.150686	0.577768	14	0.0496534
ENSG00000150455	11	TIRAP	126290671	rs10893507	11	126416693	C	A	0.514911	-0.0426288	0.0175908	0.0153777	0.0986	0.00816785	1.48999e-33	-0.432341	0.181965	0.0175034	0.0208489	0.127799	13	0.0453342
ENSG00000182326	12	C1S	7029646	rs61916271	12	6781356	A	G	0.212724	-0.0911406	0.041568	0.0283388	-0.0798	0.0102529	7.07298e-15	1.14211	0.541177	0.0348219	0.309525	0.0331235	7	0.0453342
ENSG00000167779	12	IGFBP6	53099890	rs10876406	12	53107653	C	T	0.127237	0.0576042	0.0207404	0.00547986	-0.1046	0.0132351	2.71801e-15	-0.550709	0.210171	0.0087855	0.0087855	0.81922	20	0.0418073
ENSG00000139684	13	ESD	46784338	rs3889066	13	46819646	A	T	0.658052	-0.0553364	0.0192823	0.00410728	-0.1244	0.00807084	1.32802e-53	0.444827	0.157666	0.00478268	0.0381243	0.633604	13	0.0379034
ENSG00000125952	14	MAX	65054434	rs8181938	14	65088994	G	A	0.335984	-0.0513325	0.0195376	0.00860489	-0.1794	0.00818147	1.41705e-106	0.286134	0.109684	0.00908854	0.00701081	0.0548666	20	0.0418073
ENSG00000169783	15	LINGO1	77716964	rs62009067	15	77520745	C	A	0.322068	-0.0549994	0.0245634	0.0251509	0.0864	0.0088623	1.86e-22	-0.636568	0.291701	0.0290902	0.0544637	0.428013	20	0.0453342
ENSG00000099769	16	IGFALS	1792692	rs77971956	16	1177272	G	A	0.0109344	0.219132	0.0665491	0.00099201	-0.8547	0.0510549	6.60995e-63	-0.256384	0.0793544	0.0012341	0.032528	0.215795	11	0.0283844
ENSG00000063854	16	HAGH	1811388	rs116869551	16	1826618	T	C	0.134195	-0.0499073	0.0218065	0.0220997	0.2125	0.0117647	6.28491e-73	-0.234858	0.103439	0.0231775	0.0859002	0.0592439	20	0.0453342
ENSG00000140835	16	CHST4	71531990	rs58134724	16	71492188	T	C	0.294235	0.0423138	0.0175663	0.0160049	0.0838	0.00917113	6.39899e-20	0.504938	0.216783	0.019847	0.0583117	0.903364	20	0.0453342
ENSG00000132386	17	SERPINF1	1769797	rs58697961	17	1762130	A	G	0.345924	-0.0361091	0.0179987	0.044835	-0.2831	0.008709	8.60189e-232	0.127549	0.0636983	0.0452429	0.414713	0.558291	14	0.0495517
ENSG00000131096	17	PYY	43978601	rs62080330	17	43997592	G	C	0.2167	0.125302	0.0535498	0.0192878	0.08	0.00966477	1.25801e-16	1.56628	0.695604	0.0243423	0.0255758	0.059665	15	0.0453342
ENSG00000154975	17	CA10	51895165	rs16950591	17	51828640	C	T	0.140159	0.0388586	0.0180306	0.03115	0.1729	0.0117453	4.74397e-49	0.224746	0.105395	0.0329723	0.176802	0.0123469	20	0.0453342
ENSG00000180448	19	ARHGAP45	1076276	rs7251797	19	1077986	G	A	0.34493	-0.0395004	0.0183941	0.0317573	0.1293	0.00854919	1.12099e-51	-0.305494	0.143686	0.0334927	0.131024	0.533697	20	0.0453342
ENSG00000102575	19	ACP5	11577323	rs10403399	19	11595843	G	C	0.272366	0.038313	0.0185036	0.0383992	0.2349	0.00932599	5.46613e-140	0.163104	0.0790381	0.039055	0.418792	0.753357	20	0.0481213
ENSG00000105185	19	PDCD5	32584322	rs78299806	19	32589058	G	A	0.285288	-0.0362409	0.0169224	0.0322259	0.3077	0.009044	1.0337e-253	-0.11778	0.0551051	0.0325682	0.0803419	0.66836	20	0.0453342
ENSG00000204941	19	PSG5	43176396	rs4263046	19	43290466	G	T	0.348907	-0.0396513	0.0178139	0.0260237	-0.2979	0.008572	1.26256e-264	0.133103	0.0599209	0.0263302	0.266784	0.126087	8	0.0453342
ENSG00000088833	20	NSFL1C	1458002	rs2144544	20	1432163	C	T	0.590457	0.0427054	0.0181112	0.0183759	-0.0447	0.00808091	3.174e-08	-0.955378	0.440449	0.0300749	0.0300749	0.439949	18	0.0453342
ENSG00000131050	20	BPIFA2	33171590	rs911137	20	33251014	A	G	0.222664	-0.0550086	0.0246618	0.0257127	-0.0861	0.00952487	1.57401e-19	0.638892	0.295023	0.0303441	0.189532	0.118955	17	0.0453342
ENSG00000125999	20	BPIFB1	33291676	rs6059211	20	33258247	A	G	0.22664	-0.0470978	0.0239221	0.0489764	0.2147	0.00960434	1.092e-110	-0.219366	0.111852	0.049855	0.0953671	0.098347	16	0.049855
ENSG00000133424	22	LARGE1	33542534	rs3210587	22	33920089	A	G	0.38171	0.036218	0.0171041	0.0342172	0.113	0.00853254	4.925e-40	0.320513	0.153287	0.0365331	0.239699	0.0426634	13	0.0466812
ENSG00000239713	22	APOBEC3G	39082405	rs6519166	22	39076172	A	C	0.635189	-0.0408545	0.0203513	0.0446998	-0.119	0.00859617	1.395e-43	0.343316	0.172808	0.046957	0.237292	0.363442	20	0.0496534

## Sheet: Sheet2
The colocalization results between decode proteins and gastric cancer
nsnps	PP.H0.abf	PP.H1.abf	PP.H2.abf	PP.H3.abf	PP.H4.abf	gwas1	gwas2
5737	7.14176e-38	0.707194	1.80468e-38	0.17859	0.114217	10892_8_OSMR_OSMR_coloc_5-37845858-39945596	GCST90018629_buildGRCh37_chrpos2rsid_hg38_coloc_5-37845858-39945596
5051	0	0.588293	0	0.372331	0.0393756	10916_44_PLA2R1_PLA2R_coloc_2-158932006-161062615	GCST90018629_buildGRCh37_chrpos2rsid_hg38_coloc_2-158932006-161062615
19868	1.15973e-166	1.49544e-05	7.75498e-162	0.999984	1.09062e-06	11278_4_COL11A2_COL11A2_coloc_6-32162681-34192499	GCST90018629_buildGRCh37_chrpos2rsid_hg38_coloc_6-32162681-34192499
3676	5.45327e-35	0.794427	1.18812e-35	0.173052	0.0325212	11288_26_NT5C2_5NTC_coloc_10-102087185-104277605	GCST90018629_buildGRCh37_chrpos2rsid_hg38_coloc_10-102087185-104277605
5617	2.16295e-06	0.709065	7.49924e-07	0.245797	0.0451344	11360_39_RRM1_RRM1_coloc_11-3094707-5138932	GCST90018629_buildGRCh37_chrpos2rsid_hg38_coloc_11-3094707-5138932
1384	5.15875e-53	0.676071	2.69869e-54	0.0350784	0.288851	12333_87_RPIA_RPIA_coloc_2-87691673-89750929	GCST90018629_buildGRCh37_chrpos2rsid_hg38_coloc_2-87691673-89750929
5067	2.10593e-100	0.556311	1.02966e-100	0.271826	0.171864	12411_60_MAX_MAX_coloc_14-64006174-66102695	GCST90018629_buildGRCh37_chrpos2rsid_hg38_coloc_14-64006174-66102695
5282	0	0.529407	0	0.449316	0.0212778	12517_52_PDCD5_TFAR19_coloc_19-31581190-33587453	GCST90018629_buildGRCh37_chrpos2rsid_hg38_coloc_19-31581190-33587453
5319	9.28089e-86	0.68091	2.74034e-86	0.200932	0.118158	12563_2_TNFAIP8_TFIP8_coloc_5-118268692-120399688	GCST90018629_buildGRCh37_chrpos2rsid_hg38_coloc_5-118268692-120399688
2859	7.22561e-66	0.870641	1.01158e-66	0.121881	0.00747743	12571_14_ARL3_ARL3_coloc_10-101673731-103714397	GCST90018629_buildGRCh37_chrpos2rsid_hg38_coloc_10-101673731-103714397
3734	1.01335e-189	0.676344	1.51138e-190	0.100651	0.223005	13102_1_FAM3D_FAM3D_coloc_3-57633946-59666834	GCST90018629_buildGRCh37_chrpos2rsid_hg38_coloc_3-57633946-59666834
2859	1.35139e-24	0.704034	1.75225e-25	0.0910822	0.204884	13397_88_DEFB4A_HBD_2_coloc_8-6894677-8896716	GCST90018629_buildGRCh37_chrpos2rsid_hg38_coloc_8-6894677-8896716
3912	4.45835e-45	0.8104	6.34554e-46	0.115269	0.0743306	13544_9_HMHA1_HMHA1_coloc_19-65923-2086628	GCST90018629_buildGRCh37_chrpos2rsid_hg38_coloc_19-65923-2086628
3431	2.86257e-46	0.628851	1.28914e-46	0.28311	0.0880398	13624_17_NADK_NADK_coloc_1-751232-2780457	GCST90018629_buildGRCh37_chrpos2rsid_hg38_coloc_1-751232-2780457
5556	7.64551e-58	0.815956	1.61465e-58	0.172309	0.0117348	13666_222_CA10_Carbonic_Anhydrase_X_coloc_17-50630313-53160017	GCST90018629_buildGRCh37_chrpos2rsid_hg38_coloc_17-50630313-53160017
3365	0	0.852191	0	0.0780168	0.0697921	13676_46_INHBB_Inhibin_bB_chain_coloc_2-119346136-121351803	GCST90018629_buildGRCh37_chrpos2rsid_hg38_coloc_2-119346136-121351803
3482	4.97448e-37	0.823844	6.9399e-38	0.114873	0.0612828	13930_3_APOBEC3G_ABC3G_coloc_22-38077067-40087743	GCST90018629_buildGRCh37_chrpos2rsid_hg38_coloc_22-38077067-40087743
4733	7.0489e-49	0.739236	1.30495e-49	0.136729	0.124035	14009_65_TNFAIP3_TNFAIP3_coloc_6-136867214-138883314	GCST90018629_buildGRCh37_chrpos2rsid_hg38_coloc_6-136867214-138883314
4908	8.22692e-11	0.593896	1.67203e-11	0.120417	0.285687	14088_38_IGFBP6_IGFBP_6_coloc_12-52097436-54102345	GCST90018629_buildGRCh37_chrpos2rsid_hg38_coloc_12-52097436-54102345
5701	6.46744e-11	0.710644	1.86206e-11	0.204519	0.0848369	14618_26_VOPP1_ECOP_coloc_7-54436056-56572988	GCST90018629_buildGRCh37_chrpos2rsid_hg38_coloc_7-54436056-56572988
2796	0	0.881485	0	0.10213	0.0163859	15367_38_BPIFB1_LPLC1_coloc_20-32273480-34309871	GCST90018629_buildGRCh37_chrpos2rsid_hg38_coloc_20-32273480-34309871
4778	8.14473e-172	0.738249	1.05575e-172	0.0955283	0.166223	15523_9_ALAD_HEM2_coloc_9-112386312-114401290	GCST90018629_buildGRCh37_chrpos2rsid_hg38_coloc_9-112386312-114401290
4337	6.42849e-81	0.885711	6.92949e-82	0.095455	0.018834	15562_24_GUSB_BGLR_coloc_7-64960684-66982215	GCST90018629_buildGRCh37_chrpos2rsid_hg38_coloc_7-64960684-66982215
4177	3.91934e-17	0.766376	9.66668e-18	0.188975	0.0446498	15633_6_RBP4_RBP_coloc_10-92591687-94601744	GCST90018629_buildGRCh37_chrpos2rsid_hg38_coloc_10-92591687-94601744
2746	1.00907e-14	0.831665	1.1627e-15	0.0957556	0.0725799	16302_11_BPIFA2_SPLC2_coloc_20-32161768-34181412	GCST90018629_buildGRCh37_chrpos2rsid_hg38_coloc_20-32161768-34181412
4169	1.65771e-12	0.738515	3.20215e-13	0.142538	0.118947	17161_1_DDOST_OST48_coloc_1-19651767-21661544	GCST90018629_buildGRCh37_chrpos2rsid_hg38_coloc_1-19651767-21661544
3699	1.50349e-172	0.851148	1.83715e-173	0.103959	0.0448923	17170_15_CALCB_CALCB_coloc_11-13904997-16082342	GCST90018629_buildGRCh37_chrpos2rsid_hg38_coloc_11-13904997-16082342
2756	3.86373e-222	0.8838	4.73288e-223	0.108253	0.00794647	17490_4_SH3BGRL3_SH3BGRL3_like_protein_coloc_1-25280086-27281522	GCST90018629_buildGRCh37_chrpos2rsid_hg38_coloc_1-25280086-27281522
3829	1.76367e-24	0.503468	4.35081e-25	0.123828	0.372704	17785_11_RCL_RCL_coloc_6-42225629-44229481	GCST90018629_buildGRCh37_chrpos2rsid_hg38_coloc_6-42225629-44229481
5029	1.70112e-22	0.580945	3.30934e-23	0.11271	0.306345	17802_4_NANS_SIAS_coloc_9-97056732-99083077	GCST90018629_buildGRCh37_chrpos2rsid_hg38_coloc_9-97056732-99083077
4666	7.41058e-21	0.683467	2.83668e-21	0.261568	0.054965	17808_37_NIT2_NIT2_coloc_3-99334739-101361635	GCST90018629_buildGRCh37_chrpos2rsid_hg38_coloc_3-99334739-101361635
3531	3.81908e-14	0.758038	5.96444e-15	0.118263	0.1237	18876_77_CHST4_CHST4_coloc_16-70525233-72538748	GCST90018629_buildGRCh37_chrpos2rsid_hg38_coloc_16-70525233-72538748
24456	7.97502e-12	2.42958e-05	3.05856e-07	0.931776	0.0681993	18901_26_HSPA1B_HS71B_coloc_6-30827738-32830254	GCST90018629_buildGRCh37_chrpos2rsid_hg38_coloc_6-30827738-32830254
4114	1.08652e-66	0.666353	3.98672e-67	0.244414	0.0892333	19267_14_HAGH_GLO2_coloc_16-795620-2827157	GCST90018629_buildGRCh37_chrpos2rsid_hg38_coloc_16-795620-2827157
5717	0	0.734305	0	0.130695	0.135	19557_3_KLB_KLOTB_coloc_4-38406930-40451533	GCST90018629_buildGRCh37_chrpos2rsid_hg38_coloc_4-38406930-40451533
3688	8.71352e-44	0.831128	1.28056e-44	0.122098	0.0467739	2381_52_C5_C5_coloc_9-119932987-122075195	GCST90018629_buildGRCh37_chrpos2rsid_hg38_coloc_9-119932987-122075195
4598	2.62214e-108	0.459191	5.42285e-109	0.0945189	0.44629	2474_54_APCS_SAP_coloc_1-158587826-160588865	GCST90018629_buildGRCh37_chrpos2rsid_hg38_coloc_1-158587826-160588865
4355	1.06767e-91	0.783601	2.17942e-92	0.159899	0.0565007	2991_9_IL1R1_IL_1_sRI_coloc_2-101064544-103179874	GCST90018629_buildGRCh37_chrpos2rsid_hg38_coloc_2-101064544-103179874
4858	0	0.292404	0	0.0523325	0.655264	3004_67_PDCD1LG2_PD_L2_coloc_9-4510531-6571282	GCST90018629_buildGRCh37_chrpos2rsid_hg38_coloc_9-4510531-6571282
3232	3.73207e-58	0.769366	4.88427e-59	0.100559	0.130075	3216_2_PIGR_PIGR_coloc_1-205928522-207946466	GCST90018629_buildGRCh37_chrpos2rsid_hg38_coloc_1-205928522-207946466
3890	3.95888e-133	0.849156	4.33992e-134	0.0930309	0.0578132	3232_28_ACP5_TrATPase_coloc_19-10574653-12579993	GCST90018629_buildGRCh37_chrpos2rsid_hg38_coloc_19-10574653-12579993
6063	8.19901e-23	0.141937	4.63145e-23	0.0793987	0.778664	3234_23_CCDC80_URB_coloc_3-111596797-113649530	GCST90018629_buildGRCh37_chrpos2rsid_hg38_coloc_3-111596797-113649530
3131	5.43894e-14	0.754111	5.79136e-15	0.0801315	0.165757	3727_35_PYY_PYY_coloc_17-42952733-45004469	GCST90018629_buildGRCh37_chrpos2rsid_hg38_coloc_17-42952733-45004469
4918	2.59781e-91	1.05293e-20	2.46722e-71	1	2.77235e-21	4127_75_C6_C6_coloc_5-40142116-42261438	GCST90018629_buildGRCh37_chrpos2rsid_hg38_coloc_5-40142116-42261438
4828	0.000417349	0.730163	9.74439e-05	0.170382	0.0989403	4250_23_NSFL1C_NSF1C_coloc_20-442162-2473842	GCST90018629_buildGRCh37_chrpos2rsid_hg38_coloc_20-442162-2473842
4433	0	0.818905	0	0.113164	0.067931	4964_67_ERAP1_ARTS1_coloc_5-95760810-97808100	GCST90018629_buildGRCh37_chrpos2rsid_hg38_coloc_5-95760810-97808100
5261	4.75004e-141	0.839494	8.29516e-142	0.14659	0.0139156	4984_83_ESD_Esterase_D_coloc_13-45771256-47797420	GCST90018629_buildGRCh37_chrpos2rsid_hg38_coloc_13-45771256-47797420
5269	0	0.769266	0	0.163666	0.0670683	5620_13_PAM_AMD_coloc_5-101753981-104029730	GCST90018629_buildGRCh37_chrpos2rsid_hg38_coloc_5-101753981-104029730
4948	6.81105e-201	0.814245	1.44822e-201	0.173119	0.0126367	5657_28_ST3GAL1_SIA4A_coloc_8-132454848-134571926	GCST90018629_buildGRCh37_chrpos2rsid_hg38_coloc_8-132454848-134571926
2577	1.54603e-18	0.584317	5.15411e-19	0.194577	0.221106	5900_11_HINT1_HINT1_coloc_5-130155383-132224468	GCST90018629_buildGRCh37_chrpos2rsid_hg38_coloc_5-130155383-132224468
4432	0	0.83114	0	0.143381	0.0254796	6081_52_PCOLCE2_PCOC2_coloc_3-141815922-143889206	GCST90018629_buildGRCh37_chrpos2rsid_hg38_coloc_3-141815922-143889206
2928	0	0.683175	0	0.221337	0.0954879	6385_63_VWA1_VWA1_coloc_1-434861-2442882	GCST90018629_buildGRCh37_chrpos2rsid_hg38_coloc_1-434861-2442882
4197	0.631478	0.0699879	0.264148	0.0292709	0.00511507	6458_6_RPN1_RPN1_coloc_3-127619969-129681075	GCST90018629_buildGRCh37_chrpos2rsid_hg38_coloc_3-127619969-129681075
4052	5.91725e-61	0.166027	2.17451e-61	0.0602389	0.773734	6605_17_IGFALS_IGFALS_coloc_16-790413-2794971	GCST90018629_buildGRCh37_chrpos2rsid_hg38_coloc_16-790413-2794971
5150	3.09061e-17	0.772626	5.239e-18	0.130874	0.0964997	6620_82_LINGO1_LIGO1_coloc_15-76613027-78820900	GCST90018629_buildGRCh37_chrpos2rsid_hg38_coloc_15-76613027-78820900
7801	2.68602e-34	0.72358	8.40576e-35	0.226391	0.0500289	7935_26_LARGE_LARGE_coloc_22-32162226-34922841	GCST90018629_buildGRCh37_chrpos2rsid_hg38_coloc_22-32162226-34922841
3710	0	0.638151	0	0.197657	0.164192	8345_27_GPX7_GPX7_coloc_1-51602371-53609051	GCST90018629_buildGRCh37_chrpos2rsid_hg38_coloc_1-51602371-53609051
4294	0	0.772008	0	0.165332	0.0626603	8397_147_QSOX2_QSOX2_coloc_9-135206333-137245812	GCST90018629_buildGRCh37_chrpos2rsid_hg38_coloc_9-135206333-137245812
2864	0.66595	0.0441177	0.262919	0.0174082	0.00960488	8825_4_PILRA_PILRA_coloc_7-99367530-101400096	GCST90018629_buildGRCh37_chrpos2rsid_hg38_coloc_7-99367530-101400096
4808	0	0.813595	0	0.172147	0.0142587	8840_61_C1S_C1s_coloc_12-5988259-8071032	GCST90018629_buildGRCh37_chrpos2rsid_hg38_coloc_12-5988259-8071032
5357	0.389833	0.386376	0.097599	0.0967041	0.0294877	8991_115_FCRL4_FCRL4_coloc_1-156573747-158598085	GCST90018629_buildGRCh37_chrpos2rsid_hg38_coloc_1-156573747-158598085
5126	8.08646e-227	0.711054	2.84183e-227	0.249847	0.039099	9211_19_SERPINF1_PEDF_coloc_17-762029-2777565	GCST90018629_buildGRCh37_chrpos2rsid_hg38_coloc_17-762029-2777565
5507	1.2665e-251	0.6938	3.48319e-252	0.190696	0.115504	9231_23_IMPAD1_IMPA3_coloc_8-55957931-57993867	GCST90018629_buildGRCh37_chrpos2rsid_hg38_coloc_8-55957931-57993867
2328	2.70224e-152	0.430481	1.07407e-152	0.170706	0.398814	9312_8_AZGP1_AZGP1_coloc_7-98966720-100976042	GCST90018629_buildGRCh37_chrpos2rsid_hg38_coloc_7-98966720-100976042
2424	3.39495e-257	0.830452	3.40104e-258	0.0831078	0.08644	9314_9_PSG5_PSG5_coloc_19-42166256-44186536	GCST90018629_buildGRCh37_chrpos2rsid_hg38_coloc_19-42166256-44186536
3434	2.76108e-21	0.544773	4.24544e-22	0.0833925	0.371834	9380_2_PLA2G12B_sPLA_2__XIII_coloc_10-71934762-73954806	GCST90018629_buildGRCh37_chrpos2rsid_hg38_coloc_10-71934762-73954806
3630	0	0.682875	0	0.098158	0.218967	9449_150_C4BPA_C4b_binding_protein_alpha_chain_coloc_1-206104233-208144972	GCST90018629_buildGRCh37_chrpos2rsid_hg38_coloc_1-206104233-208144972
4809	3.6632e-06	0.796141	6.11585e-07	0.132848	0.0710067	9759_13_IDO1_INDO_coloc_8-38902275-40928790	GCST90018629_buildGRCh37_chrpos2rsid_hg38_coloc_8-38902275-40928790
4857	4.9073e-45	0.60943	1.08675e-45	0.134706	0.255863	9839_148_TIRAP_Tirap_coloc_11-125282497-127298845	GCST90018629_buildGRCh37_chrpos2rsid_hg38_coloc_11-125282497-127298845

## Sheet: Sheet3
The SMR results between UKBppp proteins and gastric cancer
probeID	ProbeChr	Gene	Probe_bp	topSNP	topSNP_chr	topSNP_bp	A1	A2	Freq	b_GWAS	se_GWAS	p_GWAS	b_eQTL	se_eQTL	p_eQTL	b_SMR	se_SMR	p_SMR	p_SMR_multi	p_HEIDI	nsnp_HEIDI	p_SMR_fdr
ENSG00000008130	1	NADK	1765844	rs1014988	1	1748780	A	G	0.501988	0.0554203	0.0184734	0.00269974	0.252465	0.00740114	4.95785e-255	0.219517	0.0734545	0.00280376	0.000529978	0.253584	20	0.0287762
ENSG00000116809	1	ZBTB17	15959000	rs848217	1	15945755	G	A	0.501988	0.0581001	0.0180202	0.00126342	-0.0460104	0.00752999	9.94534e-10	-1.26276	0.442835	0.00435084	0.00435084	0.970313	18	0.0287762
ENSG00000188257	1	PLA2G2A	19977924	rs10732279	1	19978572	T	C	0.771372	0.0812596	0.0371474	0.0287069	-0.642925	0.00858647	0	-0.12639	0.0578035	0.028775	0.183573	0.0658149	20	0.0431628
ENSG00000158825	1	CDA	20603994	rs2072671	1	20589208	C	A	0.314115	0.0443308	0.0209757	0.0345638	-0.489364	0.00769761	0	-0.0905886	0.0428869	0.0346637	0.0717053	0.198313	20	0.0431628
ENSG00000240038	1	AMY2B	103566674	rs4244372	1	103497405	A	T	0.335984	0.0445355	0.0180662	0.0136965	-0.35805	0.00824187	0	-0.124383	0.0505384	0.0138486	0.0656695	0.26027	20	0.0400071
ENSG00000162877	1	PM20D1	205839078	rs1104899	1	205845357	A	G	0.251491	0.040637	0.0197664	0.039796	-0.818203	0.00862322	0	-0.0496662	0.024164	0.0398425	0.731904	0.902282	11	0.0431628
ENSG00000115884	2	SDC1	20213115	rs907866	2	20171619	A	G	0.427435	-0.0381621	0.0180131	0.0341259	0.130616	0.00734183	8.35041e-71	-0.29217	0.138883	0.0354032	0.270727	0.73978	20	0.0431628
ENSG00000115602	2	IL1RL1	102331770	rs12470864	2	102309902	A	G	0.34493	0.0374097	0.0170228	0.0279759	-0.688545	0.00714748	0	-0.0543316	0.0247293	0.0280167	0.000209014	0.134565	20	0.0431628
ENSG00000091986	3	CCDC80	112623164	rs6772337	3	112643341	G	A	0.586481	0.0567416	0.0168291	0.000747229	-0.0698784	0.00711606	9.25126e-23	-0.812005	0.254635	0.00142814	0.00304017	0.0150063	14	0.0287762
ENSG00000145730	5	PAM	102891856	rs257309	5	103082900	G	A	0.321074	0.0364508	0.0167728	0.0297648	-0.399553	0.00781552	0	-0.091229	0.0420169	0.0299126	0.383125	0.087181	20	0.0431628
ENSG00000078401	6	EDN1	12293778	rs5370	6	12296022	T	G	0.212724	-0.0430915	0.0184407	0.0194514	0.271847	0.00905546	5.34362e-198	-0.158514	0.06804	0.0198211	0.237047	0.0532131	20	0.0431628
ENSG00000130340	6	SNX9	157822732	rs688181	6	157671606	C	T	0.678926	0.0454423	0.0197353	0.0213017	-0.089072	0.00826511	4.42692e-27	-0.510175	0.226566	0.0243369	0.152154	0.739865	20	0.0431628
ENSG00000026297	6	RNASET2	166939652	rs3756838	6	166957763	A	G	0.260437	0.0357935	0.0173236	0.0388126	0.46361	0.00891084	0	0.077206	0.0373962	0.0389665	0.194717	0.523953	20	0.0431628
ENSG00000213066	6	CEP43	167047053	rs2237276	6	167028627	T	C	0.429423	-0.0354033	0.0174355	0.0423027	0.0652832	0.0075844	7.46277e-18	-0.542303	0.274405	0.0481225	0.049221	0.04304	17	0.0481225
ENSG00000121716	7	PILRB	100360004	rs34995835	7	100392741	G	T	0.702783	0.0456227	0.0181714	0.0120495	1.11952	0.00816103	0	0.040752	0.0162341	0.0120639	0.190886	0.0319989	20	0.0392076
ENSG00000164733	8	CTSB	11856028	rs2010629	8	11770663	T	C	0.193837	-0.372786	0.174545	0.0326995	0.484827	0.0100372	0	-0.768904	0.360367	0.0328699	0.00670746	0.0198684	20	0.0431628
ENSG00000173535	8	TNFRSF10C	23110183	rs6557616	8	23103191	C	G	0.76839	0.0543637	0.0197688	0.00596002	0.296985	0.00737355	0	0.183052	0.06672	0.00607722	0.217153	0.612701	20	0.0287762
ENSG00000131203	8	IDO1	39915532	rs7820268	8	39920010	T	C	0.322068	-0.0486661	0.0235006	0.0383735	0.26419	0.00780076	2.02542e-251	-0.184209	0.0891196	0.0387358	0.276728	0.0753449	20	0.0431628
ENSG00000132740	11	IGHMBP2	68922232	rs11605837	11	68830418	T	G	0.321074	-0.0460905	0.0195478	0.0183818	0.0783275	0.00835475	6.904e-21	-0.588433	0.257336	0.0222175	0.0736329	0.341363	20	0.0431628
ENSG00000137496	11	IL18BP	72002164	rs5743658	11	71998678	C	A	0.0377734	-0.0926744	0.0364829	0.0110785	0.133775	0.0219681	1.13253e-09	-0.692763	0.295495	0.019057	0.0370898	0.406962	15	0.0431628
ENSG00000167779	12	IGFBP6	53099890	rs10876406	12	53107653	C	T	0.127237	0.0576042	0.0207404	0.00547986	-0.135839	0.0111095	2.22126e-34	-0.424062	0.156573	0.00676102	0.00408419	0.741386	20	0.0287762
ENSG00000108515	17	ENO3	4952612	rs55988055	17	4979213	T	A	0.124254	0.0825359	0.0381052	0.0303113	0.107221	0.010776	2.52233e-23	0.769774	0.363713	0.034308	0.0645926	0.195485	20	0.0431628
ENSG00000035862	17	TIMP2	78889182	rs8066695	17	78917761	C	T	0.468191	-0.0477532	0.0175067	0.00637743	0.0932838	0.00759236	1.07004e-34	-0.511913	0.19224	0.00774745	0.046424	0.624802	20	0.0287762
ENSG00000101109	20	STK4	45023250	rs2284276	20	45053483	G	A	0.50497	-0.0531118	0.0178965	0.0030001	0.0528768	0.00754213	2.36865e-12	-1.00444	0.36753	0.00627687	0.00627687	0.0848811	7	0.0287762
ENSG00000160200	21	CBS	43065067	rs234714	21	43067923	C	T	0.76839	0.036346	0.018151	0.0452387	0.127421	0.00946426	2.56859e-41	0.285244	0.144016	0.0476316	0.512151	0.821574	20	0.0481225
ENSG00000160213	21	CSTB	43774420	rs9984420	21	43779231	A	T	0.10338	0.0487181	0.0222013	0.0282079	-0.64012	0.0118468	0	-0.0761078	0.0347116	0.028338	0.271882	0.0497032	20	0.0431628
ENSG00000157873	1	TNFRSF14	2560510	rs2495366	1	2557491	A	G	0.482107	0.0428909	0.0169467	0.0113759	0.114794	0.00740937	3.86276e-54	0.373634	0.149584	0.0124958	0.0124958	0.265216	20	0.044873
ENSG00000130770	1	ATP5IF1	28241508	rs12154	1	28236165	G	A	0.289264	0.0581696	0.0283405	0.0401183	0.112987	0.00831641	4.84622e-42	0.514835	0.253676	0.0424075	0.0197645	0.397838	20	0.0493287
ENSG00000174876	1	AMY1B	103691934	rs4244372	1	103497405	A	T	0.335984	0.0445355	0.0180662	0.0136965	-0.328132	0.00813979	0	-0.135724	0.0551606	0.0138732	0.0672	0.227398	20	0.044873
ENSG00000143126	1	CELSR2	109262645	rs12740374	1	109274968	T	G	0.212724	0.0698191	0.0320847	0.0295487	0.46018	0.0090776	0	0.151721	0.0697862	0.0296987	0.467244	0.541321	20	0.0479561
ENSG00000132703	1	APCS	159588346	rs36126250	1	159593911	G	T	0.0208748	-0.15943	0.0605267	0.00843727	-0.535152	0.0235983	7.46422e-114	0.297916	0.113862	0.00888466	0.0620557	0.21793	6	0.044873
ENSG00000188783	1	PRELP	203483579	rs1572966	1	203465595	C	T	0.0516899	-0.0419958	0.0195851	0.0320112	-0.430334	0.0157554	2.93805e-164	0.0975888	0.0456515	0.0325416	0.474119	0.527468	4	0.0479561
ENSG00000163083	2	INHBB	120348970	rs17050272	2	120548864	A	G	0.450298	0.0359449	0.0167632	0.0320105	0.364573	0.00749325	0	0.0985945	0.0460249	0.0321774	0.241602	0.959476	20	0.0479561
ENSG00000054219	2	LY75	159854056	rs6735923	2	159913077	C	T	0.539761	0.0484269	0.0167181	0.00377152	0.931806	0.00764473	0	0.051971	0.0179467	0.00378136	0.00251116	0.133218	20	0.044873
ENSG00000115221	2	ITGB6	160149990	rs6432601	2	160121432	G	A	0.658052	0.0411377	0.0167781	0.0142119	0.288924	0.00777655	3.88689e-302	0.142382	0.0581975	0.0144235	0.0320973	0.715817	20	0.044873
ENSG00000187957	2	DNER	229536092	rs34412673	2	229727643	T	A	0.348907	0.041009	0.019581	0.0362313	-0.280264	0.00791054	6.06924e-275	-0.146323	0.0699883	0.0365574	0.779191	0.374119	20	0.0493281
ENSG00000138675	4	FGF5	80301660	rs12509595	4	80261400	C	T	0.267396	-0.0449745	0.0182461	0.0137059	0.682078	0.00783308	0	-0.0659375	0.0267615	0.0137437	0.0792579	0.424254	14	0.044873
ENSG00000164509	5	IL31RA	55887106	rs161651	5	55909767	T	C	0.296223	0.0432209	0.0169739	0.0108865	-0.630712	0.00829015	0	-0.0685272	0.0269273	0.010931	0.360855	0.547501	20	0.044873
ENSG00000095970	6	TREM2	41160846	rs9462674	6	41185009	A	T	0.0258449	0.240434	0.119593	0.0443842	-0.23323	0.0200001	2.00586e-31	-1.03089	0.520331	0.047567	0.0148409	0.173766	5	0.0493287
ENSG00000112667	6	DNPH1	43227555	rs77321231	6	43232465	T	C	0.0705765	0.260052	0.102301	0.0110212	-0.46033	0.0120757	0	-0.564925	0.222728	0.0112001	0.109959	0.0222499	20	0.044873
ENSG00000106665	7	CLIP2	74347671	rs117471007	7	74282158	T	C	0.0715706	-0.0844256	0.0380529	0.0265114	0.249947	0.0154491	7.12369e-59	-0.337774	0.153669	0.0279444	0.280799	0.186035	6	0.0479561
ENSG00000120885	8	CLU	27605808	rs553014	8	27708997	T	C	0.516899	-0.0402109	0.0172356	0.0196474	0.094191	0.00751843	5.24568e-36	-0.426908	0.186132	0.0218144	0.180371	0.181361	20	0.0479561
ENSG00000131203	8	IDO1	39915532	rs7820268	8	39920010	T	C	0.322068	-0.0486661	0.0235006	0.0383735	0.257557	0.00783169	3.42597e-237	-0.188953	0.0914251	0.0387578	0.160911	0.0710883	20	0.0493281
ENSG00000086205	11	FOLH1	49176865	rs7940412	11	50004775	A	G	0.0596421	0.0933355	0.0411449	0.0233011	0.162596	0.0158786	1.3134e-24	0.574033	0.259185	0.0267761	0.138859	0.0111608	20	0.0479561
ENSG00000111321	12	LTBR	6383308	rs10849449	12	6389496	G	A	0.654076	0.0527126	0.0193431	0.00642755	-0.311182	0.00776713	0	-0.169395	0.0623038	0.00655091	0.130115	0.177313	10	0.044873
ENSG00000010610	12	CD4	6803828	rs61916271	12	6781356	A	G	0.212724	-0.0911406	0.041568	0.0283388	-0.359587	0.0094792	0	0.253459	0.115792	0.0286033	0.588056	0.0253392	14	0.0479561
ENSG00000182512	14	GLRX5	95539114	rs179133	14	95529516	T	C	0.189861	0.0449341	0.0206115	0.029254	0.155672	0.0100149	1.74622e-54	0.288646	0.133699	0.0308566	0.220027	0.149793	20	0.0479561
ENSG00000137809	15	ITGA11	68364348	rs2306022	15	68335825	T	C	0.0715706	0.0740653	0.0307634	0.0160588	-0.359098	0.0129452	2.30973e-169	-0.206254	0.0859906	0.0164597	0.0253737	0.761523	20	0.0460871
ENSG00000132386	17	SERPINF1	1769797	rs58697961	17	1762130	A	G	0.345924	-0.0361091	0.0179987	0.044835	-0.283124	0.00770395	1.14156e-295	0.127538	0.0636666	0.045154	0.295911	0.672496	16	0.0493287
ENSG00000109062	17	SLC9A3R1	74758990	rs745666	17	74748659	C	G	0.439364	-0.0468592	0.0197221	0.0175029	0.0915183	0.00791169	6.02287e-31	-0.51202	0.219998	0.019945	0.019945	0.486406	4	0.0479561
ENSG00000152229	18	PSTPIP2	46027904	rs7237801	18	45980757	G	T	0.33002	0.036084	0.0171796	0.0356939	-0.099432	0.00823089	1.34152e-33	-0.362901	0.17537	0.0385131	0.29078	0.285943	15	0.0493281
ENSG00000180448	19	ARHGAP45	1076276	rs2074453	19	1080190	C	G	0.303181	-0.035647	0.0174497	0.0410675	0.0558674	0.0079728	2.43053e-12	-0.638065	0.325343	0.0498552	0.0498552	0.23457	20	0.0498552
ENSG00000189430	19	NCR1	54911144	rs11880295	19	54921161	T	C	0.0576541	-0.0429879	0.0211797	0.0423894	-0.332896	0.015694	7.45072e-100	0.129133	0.0639132	0.0433369	0.731859	0.502322	9	0.0493287
ENSG00000211677	22	IGLC2	22901206	rs457529	22	22902993	C	A	0.304175	-0.0407005	0.0203642	0.0456485	-0.150191	0.00840042	1.71951e-71	0.270992	0.136433	0.0470048	0.12929	0.615152	13	0.0493287
ENSG00000182134	1	TDRKH	151780762	rs4845556	1	151772382	A	G	0.482107	-0.0352346	0.0171175	0.0395521	0.313668	0.00758158	0	-0.112331	0.0546395	0.0397967	0.120899	0.0205566	20	0.0403848
ENSG00000163209	1	SPRR3	153002802	rs61811427	1	152995943	T	C	0.532803	-0.0368587	0.0175705	0.0359268	0.239748	0.00704024	3.54714e-254	-0.153739	0.0734265	0.036279	0.2352	0.953703	20	0.0403848
ENSG00000115594	2	IL1R1	102122209	rs7606726	2	102134501	C	T	0.310139	0.0351811	0.0170929	0.0395684	-0.181455	0.00800625	1.01161e-113	-0.193883	0.0945869	0.0403848	0.26348	0.0863075	20	0.0403848
ENSG00000134962	4	KLB	39429232	rs13103023	4	39455997	A	G	0.32008	0.0435576	0.0171898	0.0112794	-0.761617	0.00796867	0	-0.057191	0.0225781	0.0113081	0.142288	0.872641	20	0.0403848
ENSG00000081051	4	AFP	73443656	rs12506899	4	73453566	G	T	0.423459	0.0490505	0.0176248	0.00538523	-0.186045	0.0071311	4.8305e-150	-0.263648	0.0952714	0.0056516	0.0886739	0.0146746	20	0.0403848
ENSG00000168477	6	TNXB	32078244	rs9267797	6	32062923	T	C	0.0188867	0.656222	0.294265	0.0257449	1.66134	0.0310197	0	0.394995	0.177278	0.0258733	3.37143e-12	0.0680119	20	0.0403848
ENSG00000112782	6	CLIC5	45980588	rs9369602	6	46181089	C	A	0.358847	-0.0479725	0.0221432	0.0302756	-0.105412	0.00797553	7.00654e-40	0.455095	0.212867	0.032522	0.135801	0.233865	19	0.0403848
ENSG00000085514	7	PILRA	100383813	rs34995835	7	100392741	G	T	0.702783	0.0456227	0.0181714	0.0120495	0.975907	0.0080924	0	0.046749	0.018624	0.0120681	0.150882	0.0299434	20	0.0403848
ENSG00000050327	7	ARHGEF5	144367960	rs1635079	7	144378656	G	A	0.576541	-0.0560811	0.0187583	0.00279285	-0.372717	0.00793724	0	0.150466	0.0504305	0.00284858	0.00649026	0.252623	9	0.0403848
ENSG00000038945	8	MSR1	16337684	rs76393968	8	16425428	A	G	0.0168986	-0.0814644	0.0378789	0.0315037	-0.878785	0.0278779	4.25311e-218	0.0927012	0.043204	0.0318998	0.329352	0.187246	15	0.0403848
ENSG00000131203	8	IDO1	39915532	rs7820268	8	39920010	T	C	0.322068	-0.0486661	0.0235006	0.0383735	0.25681	0.00773629	1.25018e-241	-0.189502	0.0916877	0.0387507	0.171625	0.0987401	20	0.0403848
ENSG00000099256	10	PRTFDC1	24900610	rs79754110	10	25229623	A	G	0.0397614	-0.0990124	0.047351	0.0365255	-0.221872	0.0188216	4.49161e-32	0.446259	0.216748	0.0395049	0.212457	0.0431136	6	0.0403848
ENSG00000125952	14	MAX	65054434	rs8005829	14	65109447	T	C	0.609344	0.0368761	0.0167932	0.0280991	0.0784266	0.00776087	5.22879e-24	0.470199	0.219123	0.0318872	0.0318872	0.0735683	20	0.0403848
ENSG00000138621	15	PPCDC	75070524	rs2305667	15	74852202	A	G	0.055666	0.0462487	0.0206077	0.0248162	0.488372	0.0178724	2.1127e-164	0.0946998	0.0423387	0.0253046	0.134147	0.154723	20	0.0403848
ENSG00000103415	16	HMOX2	4492518	rs4785965	16	4464654	A	G	0.722664	0.0427917	0.0181187	0.0181893	-0.120824	0.0086027	8.27936e-45	-0.354165	0.152065	0.0198568	0.0227419	0.639143	20	0.0403848
ENSG00000130383	19	FUT5	5868183	rs17855739	19	5831829	T	C	0.0417495	0.0985418	0.0378622	0.00925083	-1.2319	0.0181279	0	-0.0799917	0.0307573	0.0093024	0.189936	0.890673	9	0.0403848
ENSG00000105185	19	PDCD5	32584322	rs12982788	19	32594595	C	A	0.285288	-0.0363605	0.0169192	0.0316285	0.327529	0.00839071	0	-0.111015	0.0517352	0.031887	0.0586981	0.355417	20	0.0403848
ENSG00000090013	19	BLVRB	40456764	rs3746006	19	40213503	T	C	0.324056	-0.0389477	0.0173092	0.0244418	-0.0534336	0.00786763	1.10917e-11	0.728898	0.341255	0.0326845	0.199129	0.430797	14	0.0403848
ENSG00000088833	20	NSFL1C	1458002	rs910620	20	1444433	G	A	0.589463	0.0421312	0.0180529	0.019608	-0.0758202	0.00740474	1.32038e-24	-0.555672	0.244207	0.0228811	0.0605593	0.138612	20	0.0403848
ENSG00000250479	22	CHCHD10	23766903	rs34284791	22	23824602	A	G	0.107356	-0.0496389	0.0216652	0.021953	-0.118256	0.0112612	8.531e-26	0.419758	0.187516	0.0251872	0.14379	0.0647545	20	0.0403848
ENSG00000100031	22	GGT1	24611908	rs28509371	22	24601879	C	T	0.369781	-0.0433406	0.0182929	0.0178235	0.254153	0.00732924	1.7761e-263	-0.17053	0.0721435	0.0180908	0.00806966	0.230595	20	0.0403848
ENSG00000179403	1	VWA1	1438872	rs2031709	1	1550604	A	C	0.0198807	-0.0535482	0.023967	0.0254667	-1.20851	0.0292785	0	0.0443093	0.0198609	0.0256822	0.261404	0.0652122	12	0.0490098
ENSG00000116171	1	SCP2	52989487	rs1242331	1	52927236	G	A	0.652087	0.0409328	0.018175	0.0243131	0.0455546	0.00809375	1.81924e-08	0.898543	0.429727	0.0365315	0.0365315	0.351382	13	0.0490098
ENSG00000123843	1	C4BPB	207094426	rs3813948	1	207096513	C	T	0.0705765	0.0601093	0.0212401	0.00465495	-0.307177	0.0141345	1.0139e-104	-0.195683	0.0697299	0.00501146	0.021663	0.0870535	9	0.0490098
ENSG00000066027	1	PPP2R5A	212323632	rs72754311	1	212363757	T	C	0.0347913	1.12628	0.481611	0.0193582	-0.298728	0.0263962	1.07994e-29	-3.77024	1.64627	0.0220111	0.0220111	0.0123199	6	0.0490098
ENSG00000144369	2	FAM171B	186730010	rs3886170	2	186692567	T	C	0.248509	0.0597508	0.0288359	0.0382563	-0.376972	0.0084636	0	-0.158502	0.0765762	0.0384655	0.743044	0.11837	20	0.0490098
ENSG00000198643	3	FAM3D	58650390	rs12493131	3	58664251	G	T	0.879722	0.0623351	0.0240374	0.00950735	0.491741	0.0109208	0	0.126764	0.0489633	0.00962661	0.117673	0.487344	14	0.0490098
ENSG00000159685	3	CHCHD6	126832330	rs9863101	3	126689461	C	T	0.16501	0.0411177	0.0193521	0.03361	-0.305642	0.00990836	6.16813e-209	-0.134529	0.0634661	0.0340316	0.438785	0.678001	20	0.0490098
ENSG00000196549	3	MME	155103914	rs6795596	3	155046710	A	C	0.0616302	-0.195646	0.0777735	0.0118836	-0.106567	0.0134817	2.68844e-15	1.83589	0.765874	0.0165245	0.00958766	0.696029	3	0.0490098
ENSG00000150630	4	VEGFC	176738230	rs4515114	4	176810954	A	G	0.88668	0.122072	0.0600468	0.0420574	0.107507	0.0118253	9.7904e-20	1.13548	0.572333	0.047261	0.047261	0.0174154	20	0.0490098
ENSG00000145703	5	IQGAP2	76555708	rs10037254	5	76634815	A	G	0.609344	-0.0339708	0.0167813	0.0429369	0.144588	0.0076325	4.97405e-80	-0.234949	0.116724	0.044129	0.14535	0.337198	17	0.0490098
ENSG00000164574	5	GALNT10	154305857	rs7728922	5	154173239	T	C	0.926441	-0.101376	0.0474429	0.0326138	0.412036	0.0135261	8.23491e-204	-0.246038	0.115426	0.0330424	0.200413	0.0955592	19	0.0490098
ENSG00000146232	6	NFKBIE	44261977	rs28362856	6	44266802	C	G	0.0497018	-0.0489462	0.020273	0.0157633	-0.52262	0.01858	4.44212e-174	0.0936553	0.0389338	0.0161501	0.0092752	0.0920813	16	0.0490098
ENSG00000129422	8	MTUS1	17722444	rs13278994	8	17916258	A	G	0.0208748	-0.0851778	0.0361969	0.0186138	0.37309	0.0201571	1.74384e-76	-0.228304	0.0978002	0.0195755	0.260317	0.312193	20	0.0490098
ENSG00000131203	8	IDO1	39915532	rs7820268	8	39920010	T	C	0.322068	-0.0486661	0.0235006	0.0383735	0.267087	0.00776249	1.95502e-259	-0.182211	0.0881479	0.0387245	0.357094	0.0738	20	0.0490098
ENSG00000008513	8	ST3GAL1	133513394	rs11779894	8	133489523	C	T	0.337972	0.0520382	0.017838	0.00353108	-0.191911	0.00764336	4.04573e-139	-0.271158	0.0935745	0.00375816	0.121809	0.236174	14	0.0490098
ENSG00000139211	12	AMIGO2	47077833	rs215384	12	47366418	G	C	0.441352	-0.0375772	0.016728	0.024681	0.157371	0.00763889	2.67239e-94	-0.238781	0.106927	0.0255409	0.734166	0.180601	20	0.0490098
ENSG00000139626	12	ITGB7	53199302	rs12232003	12	53199848	C	T	0.0795229	0.0484643	0.021986	0.0275017	0.181354	0.0133543	5.25051e-42	0.267236	0.122819	0.0295669	0.121108	0.194134	20	0.0490098
ENSG00000127318	12	IL22	68250923	rs6581807	12	68265132	A	G	0.402584	-0.0375468	0.0184884	0.0422726	-0.0958006	0.00748065	1.50869e-37	0.391926	0.1954	0.0448815	0.00255813	0.900542	20	0.0490098
ENSG00000127324	12	TSPAN8	71283492	rs11178654	12	71143549	C	T	0.398608	-0.0437596	0.0179967	0.015035	0.475946	0.00738045	0	-0.0919424	0.0378394	0.0151068	0.303731	0.224096	20	0.0490098
ENSG00000111144	12	LTA4H	96022136	rs2540486	12	96037229	G	C	0.331014	0.0509676	0.017616	0.00381277	0.102159	0.0077603	1.40831e-39	0.498905	0.176553	0.00471616	0.00132312	0.610683	20	0.0490098
ENSG00000176834	12	VSIG10	118099810	rs11610878	12	118064941	C	T	0.138171	0.0675049	0.0257861	0.00884773	0.654945	0.0108859	0	0.10307	0.0394086	0.0089121	0.523171	0.619335	20	0.0490098
ENSG00000102854	16	MSLN	764800	rs2235503	16	760593	A	C	0.161034	0.0365901	0.0180443	0.0425818	0.75362	0.00937124	0	0.0485525	0.0239512	0.0426476	0.781624	0.813671	20	0.0490098
ENSG00000103066	16	PLA2G15	68253181	rs73612697	16	68128113	A	G	0.124254	0.0492578	0.0242249	0.0420162	-0.339877	0.0115834	3.04659e-189	-0.144928	0.0714463	0.0425097	0.207743	0.239506	20	0.0490098
ENSG00000197417	17	SHPK	3622245	rs224495	17	3609833	A	G	0.111332	0.0431984	0.0192761	0.0250238	-0.131784	0.0127725	5.85729e-25	-0.327797	0.149681	0.0285262	0.0285262	0.170351	20	0.0490098
ENSG00000161381	17	PLXDC1	39108854	rs62076611	17	39076581	A	G	0.0397614	-0.0689352	0.0340496	0.0429134	-0.557333	0.0186507	3.30366e-196	0.123688	0.0612339	0.0433916	0.00458465	0.0600564	7	0.0490098
ENSG00000004897	17	CDC27	47153562	rs79702286	17	47219250	G	A	0.082505	0.0595706	0.0241136	0.0134956	0.136035	0.0125701	2.70522e-27	0.437907	0.18182	0.01602	0.0140215	0.101665	20	0.0490098
ENSG00000170412	17	GPRC5C	74438252	rs6980	17	74447148	G	C	0.922465	-0.0478705	0.0240789	0.0468039	-0.182996	0.012549	3.62742e-48	0.261593	0.132799	0.0488558	0.147204	0.392957	20	0.0490098
ENSG00000213892	19	CEACAM16	44704934	rs17715069	19	44706173	C	G	0.419483	-0.0377506	0.0176412	0.0323615	-0.335255	0.00766408	0	0.112603	0.0526831	0.0325687	0.0306333	0.0261221	20	0.0490098
ENSG00000167748	19	KLK1	50821466	rs5516	19	50820217	G	C	0.671968	0.0422829	0.0201045	0.0354519	-0.243931	0.00816572	4.47172e-196	-0.173339	0.0826226	0.0359082	0.0809995	0.131086	20	0.0490098
ENSG00000240403	19	KIR3DL2	54858825	rs372371471	19	54844280	T	C	0.0457256	-0.0564524	0.0284479	0.0472094	0.340989	0.0218909	1.04787e-54	-0.165555	0.0841018	0.0490098	0.0796472	0.470137	20	0.0490098
ENSG00000100092	22	SH3BP1	37645386	rs12710562	22	37633716	G	A	0.188867	0.0519484	0.0198145	0.00874836	0.267861	0.00990296	3.96911e-161	0.193938	0.0743198	0.00906733	0.409664	0.231155	20	0.0490098

## Sheet: Sheet4
The colocalization results between UKBppp proteins and gastric cancer
nsnps	PP.H0.abf	PP.H1.abf	PP.H2.abf	PP.H3.abf	PP.H4.abf	gwas1	gwas2
6109	3.28441e-17	0.428763	1.85746e-17	0.242153	0.329084	ccdc80_q76m96_oid20226_v1_cardiometabolic_coloc_3-111596797-113649530	GCST90018629_buildGRCh37_chrpos2rsid_hg38_coloc_3-111596797-113649530

## Sheet: Sheet5
The MR results between lipid species and gastric cancer
exposure	outcome	nsnp	b_MR.Egger	se_MR.Egger	pval_MR.Egger	estimate_MR.Egger	b_Weighted.median	se_Weighted.median	pval_Weighted.median	estimate_Weighted.median	b_Inverse.variance.weighted.	se_Inverse.variance.weighted.	pval_Inverse.variance.weighted.	estimate_Inverse.variance.weighted.	b_Weighted.mode	se_Weighted.mode	pval_Weighted.mode	estimate_Weighted.mode	b_Simple.mode	se_Simple.mode	pval_Simple.mode	estimate_Simple.mode	correct_causal_direction	steiger_pval	Value_Power	F	R2	Q_Inverse.variance.weighted	Q_df_Inverse.variance.weighted	Q_pval_Inverse.variance.weighted	egger_intercept	se	pval	outliers	global_test_p
GCST90277238	gastric cancer	16	-0.811016	0.329286	0.0273532	0.44 (0.23-0.85)	-0.106995	0.0934381	0.25217	0.90 (0.75-1.08)	-0.131772	0.0648138	0.0420432	0.88 (0.77-1.00)	-0.151309	0.177699	0.407885	0.86 (0.61-1.22)	-0.133656	0.187774	0.487519	0.87 (0.61-1.26)	TRUE	2.83e-75	9208.45	23.4874	0.0522173	17.0427	15	0.316319	0.060761	0.0288797	0.0539389	NA	0.314
GCST90277239	gastric cancer	12	0.053657	0.0705971	0.464769	1.06 (0.92-1.21)	0.0256592	0.0509521	0.614546	1.03 (0.93-1.13)	0.0254729	0.03769	0.499133	1.03 (0.95-1.10)	0.0290343	0.04681	0.547722	1.03 (0.94-1.13)	-0.0975345	0.0978612	0.340348	0.91 (0.75-1.10)	TRUE	3.14e-50	6700.48	20.706	0.0385423	14.5267	11	0.205204	-0.00578741	0.0111984	0.616526	NA	0.332
GCST90277240	gastric cancer	21	-0.119556	0.0888032	0.194047	0.89 (0.75-1.06)	-0.0234322	0.0581854	0.687156	0.98 (0.87-1.09)	-0.0242498	0.0385907	0.529752	0.98 (0.90-1.05)	-0.0440644	0.0703819	0.538346	0.96 (0.83-1.10)	-0.00919637	0.101821	0.928932	0.99 (0.81-1.21)	TRUE	2.23e-155	18953.1	35.1053	0.101852	18.0105	20	0.586714	0.0131239	0.0110133	0.248078	NA	0.598
GCST90277241	gastric cancer	16	0.202799	0.155412	0.212964	1.22 (0.90-1.66)	0.0435362	0.0679763	0.521873	1.04 (0.91-1.19)	0.0636563	0.0527399	0.227437	1.07 (0.96-1.18)	0.0160462	0.103163	0.878468	1.02 (0.83-1.24)	-0.00467253	0.0979449	0.96258	1.00 (0.82-1.21)	TRUE	2.57e-79	9395.5	23.9319	0.0532217	7.99337	15	0.924048	-0.0160716	0.0168855	0.357343	NA	0.911
GCST90277242	gastric cancer	14	0.280691	0.194316	0.174197	1.32 (0.90-1.94)	0.165288	0.0693676	0.0171824	1.18 (1.03-1.35)	0.123451	0.0475832	0.00947489	1.13 (1.03-1.24)	0.197542	0.0975996	0.0640232	1.22 (1.01-1.48)	0.206682	0.111321	0.0861635	1.23 (0.99-1.53)	TRUE	1.85e-70	8871.13	25.4722	0.0504007	19.6765	13	0.103574	-0.0199986	0.0235401	0.412204	rs429358	0.0116667
GCST90277243	gastric cancer	11	0.0448763	0.0600053	0.473625	1.05 (0.93-1.18)	0.0363261	0.0559352	0.516059	1.04 (0.93-1.16)	0.0143689	0.0452342	0.750747	1.01 (0.93-1.11)	0.0387825	0.0518418	0.471631	1.04 (0.94-1.15)	0.0744781	0.108833	0.509312	1.08 (0.87-1.33)	TRUE	1.07e-49	5834.62	22.0354	0.033729	7.98789	10	0.63002	-0.00726819	0.00939324	0.45891	NA	0.637333
GCST90277244	gastric cancer	18	0.0465559	0.325959	0.88821	1.05 (0.55-1.98)	-0.109536	0.0727657	0.13224	0.90 (0.78-1.03)	-0.117789	0.0513275	0.0217411	0.89 (0.80-0.98)	-0.145793	0.107191	0.191556	0.86 (0.70-1.07)	-0.178886	0.130875	0.189477	0.84 (0.65-1.08)	TRUE	2.19e-92	11329.4	25.3299	0.0634819	16.4519	17	0.492052	-0.0165891	0.032487	0.616578	rs2280696	0.0333333
GCST90277245	gastric cancer	16	-0.127344	0.0870522	0.165597	0.88 (0.74-1.04)	-0.0377391	0.0606229	0.533598	0.96 (0.86-1.08)	-0.0234654	0.0425117	0.580966	0.98 (0.90-1.06)	-0.0397382	0.0572414	0.498156	0.96 (0.86-1.08)	0.0541211	0.0965069	0.583214	1.06 (0.87-1.28)	TRUE	1.86e-85	10301.6	26.1298	0.058057	14.9798	15	0.452874	0.016468	0.012043	0.193044	NA	0.516333
GCST90277246	gastric cancer	15	-0.0570745	0.0935213	0.552194	0.94 (0.79-1.13)	-0.0736766	0.0690274	0.285812	0.93 (0.81-1.06)	-0.0436016	0.0491259	0.374783	0.96 (0.87-1.05)	-0.0682503	0.0766335	0.388189	0.93 (0.80-1.09)	0.0262413	0.0947438	0.78585	1.03 (0.85-1.24)	TRUE	5.03e-114	13631.3	36.3944	0.0754086	10.4152	14	0.73124	0.00234752	0.0138659	0.868166	NA	0.740333
GCST90277247	gastric cancer	12	0.0914184	0.122369	0.472219	1.10 (0.86-1.39)	0.0467367	0.0679183	0.491371	1.05 (0.92-1.20)	0.0293747	0.0485895	0.545479	1.03 (0.94-1.13)	0.0415426	0.0760838	0.595958	1.04 (0.90-1.21)	0.0769495	0.108229	0.491894	1.08 (0.87-1.34)	TRUE	7.91e-84	10056.6	34.173	0.0567545	13.1488	11	0.283714	-0.00963925	0.0169953	0.583104	NA	0.29
GCST90277248	gastric cancer	14	-0.128417	0.149332	0.406675	0.88 (0.66-1.18)	-0.0241767	0.0691116	0.726473	0.98 (0.85-1.12)	-0.0115878	0.0501359	0.817215	0.99 (0.90-1.09)	0.0095285	0.0799908	0.907001	1.01 (0.86-1.18)	-0.0500875	0.0981663	0.618442	0.95 (0.78-1.15)	TRUE	3.22e-96	13894.5	32.3794	0.0767533	9.49226	13	0.734833	0.015473	0.0186298	0.422446	rs429358, rs7853989	0.002
GCST90277249	gastric cancer	15	-0.0713109	0.108398	0.522106	0.93 (0.75-1.15)	0.0274878	0.0550682	0.617666	1.03 (0.92-1.15)	0.019627	0.0412068	0.633857	1.02 (0.94-1.11)	0.0413278	0.0582632	0.489766	1.04 (0.93-1.17)	0.0434311	0.0770443	0.581865	1.04 (0.90-1.21)	TRUE	1.17e-120	14335.4	38.132	0.0789962	8.3069	14	0.872732	0.0137195	0.0151259	0.380902	NA	0.894333
GCST90277250	gastric cancer	15	-0.0176394	0.0323206	0.594471	0.98 (0.92-1.05)	-0.00842405	0.0244312	0.730239	0.99 (0.95-1.04)	-0.00937072	0.022277	0.674013	0.99 (0.95-1.03)	-0.00775841	0.0256247	0.766517	0.99 (0.94-1.04)	-0.00118771	0.0571789	0.983721	1.00 (0.89-1.12)	TRUE	0	60367	151.613	0.265359	9.02252	14	0.829605	0.00290914	0.00823877	0.729671	NA	0.899
GCST90277251	gastric cancer	19	0.0378443	0.0677203	0.583563	1.04 (0.91-1.19)	-0.0114908	0.0395348	0.771318	0.99 (0.91-1.07)	-0.043629	0.033726	0.195793	0.96 (0.90-1.02)	-0.0148763	0.0403856	0.716904	0.99 (0.91-1.07)	-0.110992	0.102163	0.291629	0.89 (0.73-1.09)	TRUE	6.15e-214	26677.9	54.6998	0.137653	27.3786	18	0.0721638	-0.0163086	0.0109038	0.153068	NA	0.173
GCST90277252	gastric cancer	13	-0.109522	0.0909056	0.253567	0.90 (0.75-1.07)	-0.0252975	0.0527069	0.631252	0.98 (0.88-1.08)	-0.0173525	0.0403802	0.667393	0.98 (0.91-1.06)	-0.0354963	0.0528908	0.514852	0.97 (0.87-1.07)	-0.052163	0.0772577	0.51236	0.95 (0.82-1.10)	TRUE	2.92e-93	10989.3	34.3346	0.0616936	7.23549	12	0.841667	0.0158626	0.0140169	0.281839	NA	0.878667
GCST90277253	gastric cancer	19	-0.000555112	0.0684313	0.993622	1.00 (0.87-1.14)	0.00169354	0.0457851	0.970494	1.00 (0.92-1.10)	0.00907979	0.0320931	0.777238	1.01 (0.95-1.07)	-0.0252743	0.0506213	0.623628	0.98 (0.88-1.08)	0.071036	0.0677426	0.308232	1.07 (0.94-1.23)	TRUE	2.84e-136	16585.4	34.2549	0.0902766	14.3352	18	0.706991	0.00163201	0.0102375	0.87522	NA	0.672
GCST90277254	gastric cancer	8	0.193449	0.173639	0.307869	1.21 (0.86-1.71)	-0.00216872	0.0668579	0.974123	1.00 (0.88-1.14)	0.0180504	0.0514067	0.725491	1.02 (0.92-1.13)	0.0962749	0.0665441	0.191209	1.10 (0.97-1.25)	-0.034944	0.0958468	0.726188	0.97 (0.80-1.17)	TRUE	1.94e-67	10607.7	39.9471	0.0596791	7.9355	7	0.338316	-0.0291593	0.0274228	0.328546	NA	0.376333
GCST90277255	gastric cancer	15	0.049482	0.0968543	0.617992	1.05 (0.87-1.27)	0.0949654	0.0563361	0.0918546	1.10 (0.98-1.23)	0.0969073	0.0420547	0.0212048	1.10 (1.01-1.20)	0.0981963	0.0579541	0.112312	1.10 (0.98-1.24)	0.0894223	0.0704508	0.225035	1.09 (0.95-1.26)	TRUE	5.14e-107	12997.3	34.8382	0.0721543	12.8232	14	0.540489	0.00741086	0.0136337	0.595936	NA	0.622333
GCST90277256	gastric cancer	21	0.107785	0.0977555	0.283971	1.11 (0.92-1.35)	0.0750935	0.0510868	0.141584	1.08 (0.98-1.19)	0.0526804	0.0343815	0.125465	1.05 (0.99-1.13)	0.0776314	0.0491112	0.129627	1.08 (0.98-1.19)	0.069366	0.0706133	0.33767	1.07 (0.93-1.23)	TRUE	1.83e-163	20108.2	37.1316	0.107393	20.5517	20	0.423927	-0.00774652	0.0128085	0.55247	NA	0.486
GCST90277257	gastric cancer	18	0.273438	0.22486	0.241608	1.31 (0.85-2.04)	0.0270354	0.0706601	0.702008	1.03 (0.89-1.18)	-0.0192384	0.050432	0.702853	0.98 (0.89-1.08)	0.0695101	0.0917339	0.458985	1.07 (0.90-1.28)	0.0516815	0.107558	0.636999	1.05 (0.85-1.30)	TRUE	2.79e-78	9602.42	21.6891	0.0543302	21.8915	17	0.188929	-0.0309014	0.0229954	0.197758	NA	0.208333
GCST90277258	gastric cancer	12	-0.0688219	0.140747	0.635407	0.93 (0.71-1.23)	0.018234	0.0685095	0.790122	1.02 (0.89-1.16)	-0.00382308	0.0491731	0.938029	1.00 (0.90-1.10)	-0.0958909	0.104336	0.377779	0.91 (0.74-1.11)	0.0863552	0.12427	0.501535	1.09 (0.85-1.39)	TRUE	4.93e-60	8015.52	24.0991	0.0457616	9.17125	11	0.606088	0.00805973	0.0163527	0.632747	rs11775636	0.013
GCST90277259	gastric cancer	18	0.0490611	0.0389398	0.225765	1.05 (0.97-1.13)	0.0376099	0.0366066	0.304229	1.04 (0.97-1.12)	0.00711406	0.0258375	0.783056	1.01 (0.96-1.06)	0.0446285	0.0340779	0.207754	1.05 (0.98-1.12)	-0.0205424	0.0857358	0.813505	0.98 (0.83-1.16)	TRUE	5.68e-97	13729	25.7505	0.0759081	16.1842	17	0.510817	-0.0107288	0.00745131	0.16919	NA	0.393
GCST90277260	gastric cancer	13	-0.00512479	0.12711	0.968562	0.99 (0.78-1.28)	-0.0734351	0.0533465	0.168646	0.93 (0.84-1.03)	-0.0913437	0.0384808	0.0176086	0.91 (0.85-0.98)	-0.0657855	0.061358	0.304738	0.94 (0.83-1.06)	-0.0327918	0.0781452	0.682173	0.97 (0.83-1.13)	TRUE	1.56e-63	8984.78	24.4847	0.0510135	20.2274	12	0.0629052	-0.0139258	0.0188104	0.474609	NA	0.082
GCST90277261	gastric cancer	13	-0.12793	0.110307	0.270698	0.88 (0.71-1.09)	-0.0418972	0.0534032	0.432721	0.96 (0.86-1.06)	-0.00402278	0.0401929	0.920275	1.00 (0.92-1.08)	-0.0409067	0.049697	0.426494	0.96 (0.87-1.06)	0.0567297	0.0867142	0.525313	1.06 (0.89-1.25)	TRUE	4.99e-90	11381.2	34.0267	0.0637538	18.8697	12	0.0917227	0.0209414	0.0166827	0.235392	NA	0.132333
GCST90277262	gastric cancer	21	-0.257466	0.081116	0.00499645	0.77 (0.66-0.91)	-0.0738121	0.052049	0.156154	0.93 (0.84-1.03)	-0.0140521	0.0356155	0.693174	0.99 (0.92-1.06)	-0.081395	0.0567446	0.166908	0.92 (0.82-1.03)	-0.0325645	0.0930879	0.730126	0.97 (0.81-1.16)	TRUE	6.68e-137	18382.4	31.4557	0.0990894	30.6684	20	0.0597234	0.0350815	0.0104839	0.00339274	NA	0.0716667
GCST90277263	gastric cancer	12	-0.0672082	0.185933	0.725273	0.94 (0.65-1.35)	-0.0605966	0.0766326	0.429095	0.94 (0.81-1.09)	-0.0661703	0.0714895	0.354657	0.94 (0.81-1.08)	-0.0807376	0.0800795	0.335013	0.92 (0.79-1.08)	-0.179241	0.122476	0.171317	0.84 (0.66-1.06)	TRUE	3.95e-60	8022.7	25.1812	0.0458007	21.1317	11	0.0320323	0.00015355	0.0251732	0.995253	NA	0.0523333
GCST90277264	gastric cancer	20	0.0746033	0.0942029	0.438707	1.08 (0.90-1.30)	0.0311479	0.0539276	0.563543	1.03 (0.93-1.15)	0.0402042	0.0395058	0.308831	1.04 (0.96-1.12)	0.0278789	0.0540704	0.612079	1.03 (0.92-1.14)	-0.00637567	0.0732346	0.931536	0.99 (0.86-1.15)	TRUE	3.46e-98	11644.3	23.438	0.0651316	8.10608	19	0.985571	-0.00455323	0.0113197	0.692244	NA	0.986
GCST90277265	gastric cancer	17	-0.112015	0.0921763	0.243061	0.89 (0.75-1.07)	0.0116414	0.0674503	0.862971	1.01 (0.89-1.15)	-0.0338785	0.0415011	0.414313	0.97 (0.89-1.05)	0.0207855	0.0726662	0.778517	1.02 (0.89-1.18)	-0.0435569	0.101843	0.67458	0.96 (0.78-1.17)	TRUE	4e-74	8993.24	21.6034	0.0510591	17.0478	16	0.382508	0.0121645	0.0126972	0.35323	NA	0.245
GCST90277266	gastric cancer	13	-0.256979	0.780929	0.748284	0.77 (0.17-3.57)	-0.0708214	0.0872347	0.416878	0.93 (0.79-1.11)	-0.0708133	0.0626833	0.258603	0.93 (0.82-1.05)	-0.0304922	0.144132	0.836002	0.97 (0.73-1.29)	0.0272744	0.145554	0.854492	1.03 (0.77-1.37)	TRUE	5e-61	7305.49	23.1827	0.0418772	11.7847	12	0.463121	0.0155917	0.0651792	0.815339	NA	0.477333
GCST90277267	gastric cancer	7	0.174184	0.396882	0.679064	1.19 (0.55-2.59)	0.0237046	0.0953775	0.803721	1.02 (0.85-1.23)	-0.017386	0.074079	0.814445	0.98 (0.85-1.14)	0.0334959	0.107944	0.766823	1.03 (0.84-1.28)	0.043466	0.134087	0.756817	1.04 (0.80-1.36)	TRUE	6.69e-43	4914.36	29.4039	0.0285602	4.25322	6	0.642452	-0.0185658	0.0377874	0.644004	NA	0.669333
GCST90277268	gastric cancer	14	-0.0276181	0.0415544	0.518859	0.97 (0.90-1.06)	-0.00860568	0.0310407	0.781597	0.99 (0.93-1.05)	0.00506178	0.0273546	0.853195	1.01 (0.95-1.06)	-0.00606373	0.0325272	0.854993	0.99 (0.93-1.06)	0.0441913	0.0813719	0.596265	1.05 (0.89-1.23)	TRUE	2.59e-275	38965.8	93.8935	0.18907	12.0638	13	0.522418	0.00849271	0.00812916	0.316741	NA	0.595
GCST90277269	gastric cancer	12	0.365329	0.420543	0.405374	1.44 (0.63-3.29)	0.0220236	0.0791953	0.780942	1.02 (0.88-1.19)	0.0227551	0.0575654	0.692629	1.02 (0.91-1.15)	-0.0191002	0.116946	0.873224	0.98 (0.78-1.23)	0.0287738	0.130109	0.829026	1.03 (0.80-1.33)	TRUE	2.57e-65	8890.86	26.454	0.0505072	12.9902	11	0.293969	-0.0377744	0.0458403	0.429131	NA	0.280667
GCST90277270	gastric cancer	9	-0.0242405	0.0273338	0.404605	0.98 (0.93-1.03)	-0.00148279	0.0265343	0.955436	1.00 (0.95-1.05)	0.00729931	0.0212978	0.731805	1.01 (0.97-1.05)	-0.00348052	0.0206338	0.870235	1.00 (0.96-1.04)	0.187037	0.113438	0.137797	1.21 (0.97-1.51)	TRUE	2.16e-42	6791.66	22.5296	0.0390464	9.46166	8	0.304859	0.0174724	0.00949128	0.108204	NA	0.449333
GCST90277271	gastric cancer	16	-0.020002	0.0788135	0.803348	0.98 (0.84-1.14)	0.010993	0.0430574	0.798484	1.01 (0.93-1.10)	0.0434599	0.0342291	0.204199	1.04 (0.98-1.12)	0.00934872	0.040772	0.821739	1.01 (0.93-1.09)	0.00934872	0.0715878	0.897834	1.01 (0.88-1.16)	TRUE	7.6e-167	21313.5	50.636	0.113103	21.7501	15	0.114527	0.0103322	0.0109224	0.360211	NA	0.177
GCST90277272	gastric cancer	11	-0.0184326	0.0582728	0.758976	0.98 (0.88-1.10)	-0.0074012	0.0463146	0.873037	0.99 (0.91-1.09)	-0.00399519	0.036081	0.911832	1.00 (0.93-1.07)	-0.00634861	0.0439918	0.88812	0.99 (0.91-1.08)	-0.0544937	0.0658952	0.427543	0.95 (0.83-1.08)	TRUE	2.25e-48	7260.43	20.8752	0.0416296	7.22692	10	0.703862	0.00384864	0.0121982	0.759567	NA	0.789333
GCST90277273	gastric cancer	10	-0.341691	0.498423	0.512373	0.71 (0.27-1.89)	-0.030887	0.0881459	0.726033	0.97 (0.82-1.15)	0.0234343	0.0646367	0.716938	1.02 (0.90-1.16)	-0.0312359	0.126694	0.810791	0.97 (0.76-1.24)	-0.0375876	0.130751	0.780258	0.96 (0.75-1.24)	TRUE	7.27e-49	5766.85	23.6339	0.0333502	6.33969	9	0.705498	0.0348185	0.0471284	0.481139	NA	0.707
GCST90277274	gastric cancer	16	0.0270476	0.186528	0.886773	1.03 (0.71-1.48)	0.0106807	0.0684957	0.876086	1.01 (0.88-1.16)	0.0347343	0.0474715	0.464359	1.04 (0.94-1.14)	-0.000557344	0.0743795	0.99412	1.00 (0.86-1.16)	-0.0223194	0.100571	0.827364	0.98 (0.80-1.19)	TRUE	2.35e-93	11778.5	28.428	0.065833	16.3453	15	0.359483	0.000868442	0.0202616	0.966417	NA	0.386
GCST90277275	gastric cancer	10	-0.391933	0.171989	0.0521664	0.68 (0.48-0.95)	-0.0179698	0.0872759	0.836872	0.98 (0.83-1.17)	-0.0129973	0.0624449	0.835119	0.99 (0.87-1.12)	-0.0292176	0.138464	0.837578	0.97 (0.74-1.27)	0.107649	0.162793	0.525009	1.11 (0.81-1.53)	TRUE	1.88e-46	6101.67	22.8542	0.0352187	12.1896	9	0.202828	0.0448098	0.0189501	0.0456278	NA	0.169
GCST90277276	gastric cancer	25	0.0593308	0.0646358	0.368185	1.06 (0.93-1.20)	0.0128302	0.0435618	0.768353	1.01 (0.93-1.10)	-0.012289	0.0287479	0.669034	0.99 (0.93-1.05)	0.00554508	0.0405756	0.892439	1.01 (0.93-1.09)	-0.0223838	0.0621811	0.722012	0.98 (0.87-1.10)	TRUE	3.95e-202	27045.7	37.7314	0.139286	25.9504	24	0.355687	-0.0115818	0.00929572	0.225332	NA	0.391
GCST90277277	gastric cancer	18	-0.0382089	0.165679	0.820533	0.96 (0.70-1.33)	-0.00122517	0.0577113	0.983063	1.00 (0.89-1.12)	-0.0268421	0.041392	0.516671	0.97 (0.90-1.06)	0.0172601	0.0777106	0.826877	1.02 (0.87-1.18)	0.0505712	0.086891	0.568201	1.05 (0.89-1.25)	TRUE	2.14e-114	13923.4	30.8133	0.0769007	18.5757	17	0.353423	0.00138252	0.0194075	0.944093	NA	0.345667
GCST90277278	gastric cancer	12	-0.0454032	0.248984	0.858949	0.96 (0.59-1.56)	-0.0113478	0.0788782	0.885607	0.99 (0.85-1.15)	0.00240607	0.0577264	0.966753	1.00 (0.90-1.12)	-0.0313884	0.0869334	0.724892	0.97 (0.82-1.15)	-0.0313884	0.105769	0.772175	0.97 (0.79-1.19)	TRUE	9.82e-54	6521.12	22.5093	0.0375492	17.1962	11	0.102206	0.00570345	0.0283025	0.844334	NA	0.135
GCST90277279	gastric cancer	11	-0.0271447	0.138375	0.848837	0.97 (0.74-1.28)	0.00299592	0.0797681	0.97004	1.00 (0.86-1.17)	0.0228881	0.0576979	0.691597	1.02 (0.91-1.15)	1.82e-05	0.0797399	0.999822	1.00 (0.86-1.17)	-0.0110704	0.105902	0.918813	0.99 (0.80-1.22)	TRUE	3.32e-49	5733.2	21.3916	0.033162	4.34586	10	0.930399	0.0060844	0.015295	0.700045	NA	0.940667
GCST90277280	gastric cancer	26	-0.154503	0.191626	0.428004	0.86 (0.59-1.25)	-0.0822269	0.0724549	0.25643	0.92 (0.80-1.06)	-0.0727448	0.057347	0.204619	0.93 (0.83-1.04)	-0.110186	0.0846717	0.20501	0.90 (0.76-1.06)	-0.0871704	0.114951	0.455344	0.92 (0.73-1.15)	TRUE	2.47e-122	15575.3	23.5417	0.085247	43.9159	25	0.0110826	0.0091325	0.0203908	0.658261	NA	0.0116667
GCST90277281	gastric cancer	16	-0.096552	0.167448	0.573358	0.91 (0.65-1.26)	-0.0539971	0.062803	0.389908	0.95 (0.84-1.07)	-0.075958	0.0573483	0.185336	0.93 (0.83-1.04)	-0.0331627	0.0811715	0.688642	0.97 (0.83-1.13)	0.0114343	0.0939364	0.904734	1.01 (0.84-1.22)	TRUE	3.3e-74	9214.58	23.5006	0.0522503	25.0776	15	0.0489106	0.00245196	0.0186435	0.897237	NA	0.0653333
GCST90277282	gastric cancer	21	0.014574	0.072318	0.842429	1.01 (0.88-1.17)	0.00809694	0.0423984	0.848547	1.01 (0.93-1.10)	-0.0232312	0.0305826	0.447482	0.98 (0.92-1.04)	-0.00956604	0.041903	0.821739	0.99 (0.91-1.08)	-0.047168	0.0661992	0.484376	0.95 (0.84-1.09)	TRUE	1.79e-217	26625.4	48.0654	0.137419	15.1245	20	0.769243	-0.00618443	0.0107204	0.57079	NA	0.774
GCST90277283	gastric cancer	14	0.0833722	0.134505	0.54695	1.09 (0.84-1.41)	0.0150002	0.0643717	0.815743	1.02 (0.89-1.15)	0.0336235	0.0480445	0.484027	1.03 (0.94-1.14)	0.0611134	0.0758527	0.434915	1.06 (0.92-1.23)	0.0681835	0.0986147	0.501468	1.07 (0.88-1.30)	TRUE	6.05e-72	8554.8	25.0389	0.0486908	10.3871	13	0.662015	-0.00609606	0.0153946	0.699064	NA	0.690333
GCST90277284	gastric cancer	7	-0.166469	0.598092	0.791899	0.85 (0.26-2.73)	-0.0405449	0.112508	0.718569	0.96 (0.77-1.20)	-0.0138582	0.0814905	0.864964	0.99 (0.84-1.16)	-0.0708097	0.131016	0.608338	0.93 (0.72-1.20)	-0.137191	0.16126	0.427553	0.87 (0.64-1.20)	TRUE	1.31e-37	4488.89	25.8083	0.0261517	4.9991	6	0.543928	0.0141103	0.0547834	0.807007	NA	0.573333
GCST90277285	gastric cancer	12	-0.00781543	0.0812821	0.9253	0.99 (0.85-1.16)	0.0138256	0.0537145	0.796877	1.01 (0.91-1.13)	-0.00811663	0.0405918	0.841514	0.99 (0.92-1.07)	0.0040593	0.0522353	0.939453	1.00 (0.91-1.11)	-0.0338277	0.0831316	0.691874	0.97 (0.82-1.14)	TRUE	6.52e-107	12784.4	42.9883	0.0710564	9.72346	11	0.555421	-5.35e-05	0.0125048	0.996671	NA	0.615
GCST90277286	gastric cancer	9	-0.0179369	0.166256	0.917112	0.98 (0.71-1.36)	0.0168369	0.0759536	0.824568	1.02 (0.88-1.18)	0.0656727	0.0627257	0.295108	1.07 (0.94-1.21)	0.0125977	0.0802493	0.879149	1.01 (0.87-1.19)	0.00331211	0.116326	0.977983	1.00 (0.80-1.26)	TRUE	1.84e-58	6882.17	31.783	0.0395462	7.50112	8	0.483651	0.00984817	0.0180933	0.603133	NA	0.541
GCST90277287	gastric cancer	14	-0.00909761	0.0372027	0.810943	0.99 (0.92-1.07)	-0.00975946	0.0281233	0.728573	0.99 (0.94-1.05)	-0.0180462	0.0253733	0.476943	0.98 (0.93-1.03)	-0.0125334	0.0293626	0.676472	0.99 (0.93-1.05)	0.00442167	0.0753763	0.954114	1.00 (0.87-1.16)	TRUE	0	46127.6	127.849	0.216304	9.67044	13	0.720636	-0.00285072	0.00866737	0.747898	NA	0.813333
GCST90277288	gastric cancer	18	0.0626762	0.0632128	0.336195	1.06 (0.94-1.21)	0.00246205	0.0405933	0.951637	1.00 (0.93-1.09)	-0.0107265	0.0318717	0.736455	0.99 (0.93-1.05)	0.0129456	0.039877	0.749416	1.01 (0.94-1.10)	0.0424585	0.0679842	0.540568	1.04 (0.91-1.19)	TRUE	1.4e-181	22367.6	48.9674	0.118037	22.4787	17	0.167004	-0.0145321	0.010336	0.178856	NA	0.251667
GCST90277289	gastric cancer	16	-0.0212264	0.0712463	0.770132	0.98 (0.85-1.13)	-0.0121794	0.0476283	0.798168	0.99 (0.90-1.08)	-0.0188828	0.0347173	0.58651	0.98 (0.92-1.05)	-0.00593694	0.0538825	0.913725	0.99 (0.89-1.10)	0.018677	0.0707898	0.795495	1.02 (0.89-1.17)	TRUE	2.16e-136	16649.3	39.7047	0.0905929	3.35278	15	0.999205	0.000390721	0.0103724	0.970483	NA	0.999
GCST90277290	gastric cancer	19	-0.0327495	0.0592087	0.587383	0.97 (0.86-1.09)	-0.00792392	0.0359327	0.825465	0.99 (0.92-1.06)	0.0143149	0.0363513	0.693734	1.01 (0.94-1.09)	-0.00716572	0.0336286	0.833656	0.99 (0.93-1.06)	-0.0884724	0.0670207	0.203352	0.92 (0.80-1.04)	TRUE	5.73e-213	26582.5	54.5967	0.137228	29.4517	18	0.0431302	0.010575	0.0105036	0.32815	NA	0.087
GCST90277291	gastric cancer	12	0.0268792	0.113036	0.816842	1.03 (0.82-1.28)	-0.0368066	0.0676674	0.586487	0.96 (0.84-1.10)	-0.0434114	0.045752	0.342701	0.96 (0.88-1.05)	-0.0237399	0.0723421	0.748951	0.98 (0.85-1.13)	0.0220133	0.106341	0.839787	1.02 (0.83-1.26)	TRUE	5.07e-63	7479.25	25.6867	0.0428307	9.494	11	0.576392	-0.00958991	0.014102	0.511915	NA	0.628333
GCST90277292	gastric cancer	8	-0.308278	0.109471	0.0305112	0.73 (0.59-0.91)	-0.13652	0.0717232	0.0569842	0.87 (0.76-1.00)	-0.0588875	0.049778	0.236809	0.94 (0.86-1.04)	-0.144297	0.0695069	0.0765346	0.87 (0.76-0.99)	0.0479055	0.132769	0.728877	1.05 (0.81-1.36)	TRUE	1.49e-38	4989.89	23.7202	0.0289865	9.42541	7	0.223538	0.0387549	0.0151511	0.043031	NA	0.249333
GCST90277293	gastric cancer	15	0.0555906	0.0992563	0.584953	1.06 (0.87-1.28)	0.0518775	0.0565392	0.358855	1.05 (0.94-1.18)	0.0481322	0.0415637	0.24685	1.05 (0.97-1.14)	0.0407595	0.0569146	0.485673	1.04 (0.93-1.16)	0.0568996	0.093822	0.553915	1.06 (0.88-1.27)	TRUE	7.35e-100	12082.2	32.4019	0.0674163	14.7699	14	0.394062	-0.00110479	0.0131575	0.934362	rs8033940	0.0216667
GCST90277294	gastric cancer	18	0.0419272	0.0661004	0.534852	1.04 (0.92-1.19)	-0.0164963	0.0425114	0.697983	0.98 (0.91-1.07)	-0.0276825	0.0346873	0.424837	0.97 (0.91-1.04)	-0.00872948	0.0450863	0.84877	0.99 (0.91-1.08)	-0.102046	0.0921415	0.283504	0.90 (0.75-1.08)	TRUE	2.06e-200	24493.6	52.7198	0.127822	14.8342	17	0.607421	-0.0117585	0.00950476	0.233894	NA	0.603
GCST90277295	gastric cancer	14	-0.033221	0.0783092	0.678905	0.97 (0.83-1.13)	-0.0184803	0.0458505	0.686907	0.98 (0.90-1.07)	-0.0109711	0.0367958	0.76558	0.99 (0.92-1.06)	-0.0214233	0.049317	0.671121	0.98 (0.89-1.08)	-0.0598804	0.0883776	0.509935	0.94 (0.79-1.12)	TRUE	1.84e-122	18654.8	41.0144	0.10041	9.16221	13	0.760585	0.0039267	0.0121995	0.753086	NA	0.814333
GCST90277296	gastric cancer	9	0.067893	0.432267	0.87963	1.07 (0.46-2.50)	-0.040469	0.0894495	0.650965	0.96 (0.81-1.14)	0.02774	0.0663749	0.675998	1.03 (0.90-1.17)	-0.030641	0.12367	0.810558	0.97 (0.76-1.24)	-0.0416048	0.135307	0.766327	0.96 (0.74-1.25)	TRUE	1.31e-46	5473.75	25.0075	0.0317086	5.74278	8	0.676018	-0.00409966	0.0436114	0.92774	NA	0.665
GCST90277297	gastric cancer	17	-0.0785848	0.114766	0.503951	0.92 (0.74-1.16)	-0.0330992	0.0576544	0.565903	0.97 (0.86-1.08)	-0.0311559	0.0393062	0.427983	0.97 (0.90-1.05)	-0.0539506	0.0570812	0.358635	0.95 (0.85-1.06)	-0.148406	0.0853305	0.1012	0.86 (0.73-1.02)	TRUE	4.69e-130	15894.9	37.1504	0.0868443	19.7712	16	0.230701	0.00689721	0.0153638	0.659902	NA	0.274667
GCST90277298	gastric cancer	20	-0.0419609	0.0391262	0.297687	0.96 (0.89-1.04)	-0.0135908	0.030468	0.655547	0.99 (0.93-1.05)	-0.0075412	0.0248614	0.761638	0.99 (0.95-1.04)	-0.0149193	0.0285862	0.607767	0.99 (0.93-1.04)	-0.0363352	0.0695366	0.607339	0.96 (0.84-1.11)	TRUE	0	43381.5	81.0025	0.206081	15.1632	19	0.712171	0.00901252	0.00791081	0.269527	NA	0.785667
GCST90277299	gastric cancer	18	0.0701986	0.180135	0.701896	1.07 (0.75-1.53)	0.0268089	0.0733165	0.714619	1.03 (0.89-1.19)	0.0485857	0.0499064	0.330287	1.05 (0.95-1.16)	0.0185882	0.084463	0.828434	1.02 (0.86-1.20)	0.0185882	0.0973825	0.850882	1.02 (0.84-1.23)	TRUE	4.16e-81	9925.47	22.4045	0.0560557	20.5263	17	0.248198	-0.00247486	0.0195861	0.901023	NA	0.265333
GCST90277300	gastric cancer	26	-0.0160735	0.0466073	0.733195	0.98 (0.90-1.08)	0.000222662	0.0378496	0.995306	1.00 (0.93-1.08)	-0.0188804	0.0256083	0.460955	0.98 (0.93-1.03)	-0.00565495	0.0326998	0.864095	0.99 (0.93-1.06)	-0.0392474	0.0683822	0.571135	0.96 (0.84-1.10)	TRUE	9.17e-176	21650.7	31.9712	0.114687	22.5432	25	0.604218	-0.00056167	0.00779237	0.943136	NA	0.631667
GCST90277301	gastric cancer	8	-0.0922066	0.134652	0.519047	0.91 (0.70-1.19)	-0.0840067	0.091475	0.358432	0.92 (0.77-1.10)	-0.0953023	0.0658087	0.147569	0.91 (0.80-1.03)	-0.0847394	0.0859523	0.357031	0.92 (0.78-1.09)	-0.255376	0.105379	0.0458626	0.77 (0.63-0.95)	TRUE	1.1e-36	4463.24	21.8195	0.0260061	2.00778	7	0.959409	-0.000438676	0.0166469	0.979831	NA	0.972667
GCST90277302	gastric cancer	11	-0.0351404	0.0970445	0.725629	0.97 (0.80-1.17)	0.032223	0.0554016	0.560818	1.03 (0.93-1.15)	0.0440193	0.0457952	0.336441	1.05 (0.96-1.14)	0.0253789	0.0543836	0.65074	1.03 (0.92-1.14)	0.10537	0.0828522	0.23223	1.11 (0.94-1.31)	TRUE	2.09e-95	13876.3	41.1368	0.0766603	7.17897	10	0.708448	0.0122217	0.0132098	0.379001	NA	0.768333
GCST90277303	gastric cancer	15	0.00571962	0.0928495	0.951818	1.01 (0.84-1.21)	0.0398455	0.0554845	0.472673	1.04 (0.93-1.16)	0.0302346	0.0413635	0.46481	1.03 (0.95-1.12)	0.0423985	0.0521661	0.429961	1.04 (0.94-1.16)	0.0487153	0.0859527	0.579845	1.05 (0.89-1.24)	TRUE	1e-95	11460.1	30.8876	0.0641677	11.6855	14	0.63154	0.00393977	0.0133592	0.77272	NA	0.708667
GCST90277304	gastric cancer	17	-0.00343653	0.0315802	0.914788	1.00 (0.94-1.06)	-0.00881015	0.0251551	0.726164	0.99 (0.94-1.04)	-0.0128668	0.0223482	0.564788	0.99 (0.94-1.03)	-0.00862595	0.0242182	0.726361	0.99 (0.95-1.04)	-0.0393666	0.0710475	0.58718	0.96 (0.84-1.11)	TRUE	0	66781.1	145.064	0.285505	12.8152	16	0.68622	-0.00304602	0.00720716	0.678556	NA	0.796
GCST90277305	gastric cancer	13	0.0714401	0.0599906	0.258774	1.07 (0.95-1.21)	-0.00232338	0.0370798	0.950038	1.00 (0.93-1.07)	-0.0217009	0.0323797	0.50273	0.98 (0.92-1.04)	-0.0026924	0.0356024	0.940964	1.00 (0.93-1.07)	-0.0377858	0.0716295	0.60745	0.96 (0.84-1.11)	TRUE	6.25e-189	23272.5	71.1843	0.122229	17.0739	12	0.14684	-0.0235416	0.0123227	0.08248	NA	0.284
GCST90277306	gastric cancer	19	-0.0485799	0.0950563	0.615879	0.95 (0.79-1.15)	-0.0229188	0.0527869	0.66416	0.98 (0.88-1.08)	0.00128943	0.0371237	0.972292	1.00 (0.93-1.08)	-0.0357914	0.0494359	0.478372	0.96 (0.88-1.06)	-0.0863775	0.0822907	0.307763	0.92 (0.78-1.08)	TRUE	3.21e-141	18231	35.8572	0.0983536	22.7086	18	0.202037	0.0071766	0.0122375	0.565283	NA	0.264
GCST90277307	gastric cancer	17	0.0469628	0.125815	0.71417	1.05 (0.82-1.34)	0.058612	0.064762	0.365446	1.06 (0.93-1.20)	0.0906519	0.0441236	0.0399274	1.09 (1.00-1.19)	0.0303563	0.085622	0.727565	1.03 (0.87-1.22)	0.00122842	0.110364	0.991257	1.00 (0.81-1.24)	TRUE	3.45e-92	11476.7	26.609	0.0642544	15.0576	16	0.520422	0.0055707	0.0150235	0.715971	NA	0.485
GCST90277308	gastric cancer	14	0.115933	0.0958168	0.249597	1.12 (0.93-1.35)	-0.00145212	0.0537498	0.978447	1.00 (0.90-1.11)	-0.0337255	0.0402366	0.401929	0.97 (0.89-1.05)	0.00152736	0.0547451	0.978166	1.00 (0.90-1.11)	-0.17276	0.10092	0.11066	0.84 (0.69-1.03)	TRUE	2.76e-96	11591.8	33.5122	0.0648569	13.8691	13	0.383128	-0.0227966	0.013246	0.110902	NA	0.437
GCST90277309	gastric cancer	17	-0.056948	0.0668783	0.407871	0.94 (0.83-1.08)	-0.0169797	0.043954	0.69927	0.98 (0.90-1.07)	-0.0409554	0.030435	0.17841	0.96 (0.90-1.02)	-0.0112069	0.0462048	0.811437	0.99 (0.90-1.08)	-0.129786	0.100879	0.216555	0.88 (0.72-1.07)	TRUE	4.28e-200	24794.3	56.7934	0.129189	23.5569	16	0.09964	0.00340642	0.0117172	0.775247	NA	0.132667
GCST90277310	gastric cancer	12	0.0380535	0.100258	0.71221	1.04 (0.85-1.26)	0.0123632	0.0599891	0.83672	1.01 (0.90-1.14)	-0.0446644	0.0436146	0.305802	0.96 (0.88-1.04)	0.0155802	0.057778	0.792416	1.02 (0.91-1.14)	0.00196757	0.0995424	0.984584	1.00 (0.82-1.22)	TRUE	4.07e-49	6747.77	20.5583	0.0388038	19.4912	11	0.0528267	-0.0135046	0.0133516	0.335641	NA	0.115
GCST90277311	gastric cancer	14	0.0355536	0.059534	0.561474	1.04 (0.92-1.16)	0.00923767	0.035298	0.793549	1.01 (0.94-1.08)	0.0191834	0.0285913	0.502252	1.02 (0.96-1.08)	0.013053	0.0378655	0.735817	1.01 (0.94-1.09)	0.0464973	0.0649375	0.486636	1.05 (0.92-1.19)	TRUE	2.37e-194	28973.4	65.5959	0.147747	15.1276	13	0.299452	-0.00378073	0.0116001	0.750097	NA	0.402667
GCST90277312	gastric cancer	13	0.244657	0.191577	0.227878	1.28 (0.88-1.86)	0.0566854	0.0710441	0.424934	1.06 (0.92-1.22)	0.0408257	0.0537579	0.447592	1.04 (0.94-1.16)	0.0888575	0.104504	0.411815	1.09 (0.89-1.34)	0.155664	0.135613	0.273398	1.17 (0.90-1.52)	TRUE	2.45e-76	9062.38	28.5024	0.0514315	9.57425	12	0.653256	-0.0231261	0.0208625	0.291295	rs8033940	0.0323333
GCST90277313	gastric cancer	19	-0.0140337	0.0439396	0.753324	0.99 (0.90-1.07)	-0.0104787	0.0324937	0.747085	0.99 (0.93-1.05)	-0.0130464	0.0275405	0.635702	0.99 (0.94-1.04)	-0.00935496	0.0344944	0.789321	0.99 (0.93-1.06)	0.0234805	0.0738563	0.754204	1.02 (0.89-1.18)	TRUE	0	38423.5	76.8066	0.18693	13.8774	18	0.737051	0.000222282	0.00770778	0.977329	NA	0.809333
GCST90277314	gastric cancer	16	0.000683463	0.125777	0.995741	1.00 (0.78-1.28)	-0.0237569	0.0633262	0.707548	0.98 (0.86-1.11)	-0.0468467	0.0461898	0.310477	0.95 (0.87-1.04)	-0.0286221	0.064666	0.664361	0.97 (0.86-1.10)	-0.107163	0.105699	0.32673	0.90 (0.73-1.11)	TRUE	1.9e-111	13415.6	33.6417	0.0743041	13.0298	15	0.599994	-0.005666	0.013946	0.690679	NA	0.606333
GCST90277315	gastric cancer	11	0.0120155	0.0805102	0.884653	1.01 (0.86-1.19)	-0.0139911	0.0485709	0.773305	0.99 (0.90-1.08)	-0.0350743	0.0390337	0.368884	0.97 (0.89-1.04)	-0.00812433	0.0493811	0.872597	0.99 (0.90-1.09)	-0.0235815	0.0837994	0.784137	0.98 (0.83-1.15)	TRUE	6.62e-111	16784.1	47.2587	0.0912595	4.63935	10	0.913933	-0.00776821	0.011616	0.520438	NA	0.892
GCST90277316	gastric cancer	13	-0.141503	0.088521	0.138232	0.87 (0.73-1.03)	-0.0590112	0.0551166	0.284321	0.94 (0.85-1.05)	-0.0645388	0.0363169	0.0755517	0.94 (0.87-1.01)	-0.128541	0.0708895	0.0948647	0.88 (0.77-1.01)	-0.0275794	0.0972475	0.78155	0.97 (0.80-1.18)	TRUE	9.01e-83	10895.7	31.4213	0.0612007	17.0719	12	0.146914	0.0136862	0.0137268	0.340172	NA	0.139333
GCST90277317	gastric cancer	24	-0.0317793	0.123969	0.800063	0.97 (0.76-1.24)	-0.0227174	0.0606078	0.70779	0.98 (0.87-1.10)	-0.0520657	0.0366679	0.155629	0.95 (0.88-1.02)	-0.00580496	0.0818287	0.944058	0.99 (0.85-1.17)	0.0134383	0.110318	0.904104	1.01 (0.82-1.26)	TRUE	9.48e-136	17123.6	27.4335	0.092934	27.6408	23	0.229672	-0.00251036	0.0144742	0.863894	NA	0.219667
GCST90277318	gastric cancer	7	0.055982	0.275473	0.846974	1.06 (0.62-1.81)	0.0153327	0.0937791	0.870127	1.02 (0.84-1.22)	0.0367191	0.0711655	0.605876	1.04 (0.90-1.19)	0.00870358	0.107045	0.937842	1.01 (0.82-1.24)	-0.102933	0.139564	0.488626	0.90 (0.69-1.19)	TRUE	3.31e-30	3761	20.8211	0.0220035	6.07526	6	0.414812	-0.0023587	0.0323361	0.944679	NA	0.462667
GCST90277319	gastric cancer	11	0.109865	0.185081	0.567395	1.12 (0.78-1.60)	-0.133897	0.0778812	0.0855694	0.87 (0.75-1.02)	-0.119044	0.0551188	0.0307899	0.89 (0.80-0.99)	-0.120213	0.0805234	0.166328	0.89 (0.76-1.04)	-0.18547	0.110517	0.124235	0.83 (0.67-1.03)	TRUE	1.21e-56	8399.73	24.7174	0.0478504	5.88357	10	0.824949	-0.0318771	0.0246043	0.227358	NA	0.845333
GCST90277320	gastric cancer	17	-0.0576469	0.206735	0.784172	0.94 (0.63-1.42)	-0.0419292	0.0661979	0.526477	0.96 (0.84-1.09)	-0.0684525	0.0480613	0.154367	0.93 (0.85-1.03)	0.00803941	0.112272	0.943802	1.01 (0.81-1.26)	-0.00129761	0.100502	0.989858	1.00 (0.82-1.22)	TRUE	8.58e-86	10496.5	24.2635	0.0590904	8.20528	16	0.942519	-0.00114643	0.0213327	0.957851	NA	0.942
GCST90277321	gastric cancer	12	0.0161509	0.188213	0.93331	1.02 (0.70-1.47)	-0.00249856	0.0696959	0.971402	1.00 (0.87-1.14)	-0.0338374	0.0530854	0.523855	0.97 (0.87-1.07)	0.00231616	0.0708751	0.974516	1.00 (0.87-1.15)	-0.00622784	0.0956804	0.94927	0.99 (0.82-1.20)	TRUE	1.34e-76	9113.82	31.0613	0.0517084	9.89636	11	0.539733	-0.00597742	0.0215921	0.787545	NA	0.589333
GCST90277322	gastric cancer	12	0.0053722	0.104416	0.95998	1.01 (0.82-1.23)	-0.0522933	0.066732	0.433256	0.95 (0.83-1.08)	-0.0445148	0.0450766	0.323379	0.96 (0.88-1.04)	-0.0517134	0.0638876	0.43542	0.95 (0.84-1.08)	-0.0890172	0.086947	0.327914	0.91 (0.77-1.08)	TRUE	4.21e-64	8122.93	26.0329	0.0463464	10.3004	11	0.503582	-0.00745732	0.0140761	0.60782	NA	0.566667
GCST90277323	gastric cancer	18	-0.0304837	0.0541633	0.581365	0.97 (0.87-1.08)	-0.0116137	0.0398836	0.770907	0.99 (0.91-1.07)	0.0119866	0.0307261	0.696455	1.01 (0.95-1.07)	-0.0115602	0.0384596	0.767381	0.99 (0.92-1.07)	-0.0440994	0.0701342	0.537847	0.96 (0.83-1.10)	TRUE	1.47e-193	23779.5	51.7809	0.12456	19.8282	17	0.283108	0.00802065	0.00808223	0.335783	NA	0.359667
GCST90277324	gastric cancer	8	-0.0459039	0.0808574	0.590824	0.96 (0.82-1.12)	-0.0151762	0.0574975	0.791823	0.98 (0.88-1.10)	-0.0142787	0.0455771	0.754063	0.99 (0.90-1.08)	-0.0148281	0.0577313	0.804683	0.99 (0.88-1.10)	-0.00838548	0.0819218	0.921342	0.99 (0.84-1.16)	TRUE	2.66e-48	6566.21	28.4782	0.037799	3.81726	7	0.800569	0.00659624	0.0139304	0.652583	NA	0.867667
GCST90277325	gastric cancer	9	-0.0162082	0.219311	0.943154	0.98 (0.64-1.51)	-0.047833	0.0749542	0.523368	0.95 (0.82-1.10)	-0.0230722	0.0566623	0.683869	0.98 (0.87-1.09)	-0.0224828	0.0845417	0.797012	0.98 (0.83-1.15)	0.0106226	0.0928353	0.911721	1.01 (0.84-1.21)	TRUE	1.33e-57	8039.59	30.1665	0.0458927	4.20343	8	0.838319	-0.000853563	0.0263458	0.975059	NA	0.862333
GCST90277326	gastric cancer	10	-0.0455536	0.337112	0.895848	0.96 (0.49-1.85)	-0.0171924	0.10134	0.865285	0.98 (0.81-1.20)	-0.00975681	0.0794261	0.902233	0.99 (0.85-1.16)	-0.0185231	0.103066	0.861353	0.98 (0.80-1.20)	-0.0355693	0.115018	0.764171	0.97 (0.77-1.21)	TRUE	2.11e-44	5453.7	21.3923	0.0315962	6.2509	9	0.714568	0.00347571	0.0318106	0.915685	NA	0.807
GCST90277327	gastric cancer	13	0.231152	0.196334	0.263906	1.26 (0.86-1.85)	0.0762956	0.0739211	0.302015	1.08 (0.93-1.25)	0.0192185	0.0511548	0.707144	1.02 (0.92-1.13)	0.129034	0.108438	0.257082	1.14 (0.92-1.41)	0.101589	0.133044	0.459869	1.11 (0.85-1.44)	TRUE	1.42e-70	8447.85	26.5743	0.0481113	11.9923	12	0.446297	-0.0253909	0.0227095	0.28736	NA	0.446667
GCST90277328	gastric cancer	13	-0.129002	0.241099	0.603258	0.88 (0.55-1.41)	-0.14574	0.0818138	0.0748531	0.86 (0.74-1.01)	-0.107902	0.0543578	0.0471418	0.90 (0.81-1.00)	-0.0370315	0.136892	0.791359	0.96 (0.74-1.26)	-0.224074	0.150553	0.162464	0.80 (0.60-1.07)	TRUE	4.77e-69	8510.67	26.5499	0.0484518	15.9167	12	0.19508	0.00256286	0.0281873	0.929189	NA	0.182667
GCST90277329	gastric cancer	14	0.113495	0.300746	0.712483	1.12 (0.62-2.02)	-0.00232068	0.0672379	0.972467	1.00 (0.87-1.14)	-0.0355107	0.0484167	0.46329	0.97 (0.88-1.06)	0.00963615	0.0855476	0.912036	1.01 (0.85-1.19)	-0.00363756	0.0980785	0.970978	1.00 (0.82-1.21)	TRUE	2.14e-77	9893.11	27.148	0.0558832	16.4397	13	0.226197	-0.0168203	0.033354	0.623184	rs8033940	0.018
GCST90277330	gastric cancer	15	-0.046803	0.0584784	0.437892	0.95 (0.85-1.07)	-0.0269126	0.0370409	0.467493	0.97 (0.91-1.05)	-0.0267845	0.0303103	0.376872	0.97 (0.92-1.03)	-0.0242826	0.0381739	0.53497	0.98 (0.91-1.05)	-0.047102	0.063858	0.472937	0.95 (0.84-1.08)	TRUE	5.87e-195	28016.7	60.4705	0.143569	10.3436	14	0.736655	0.00409095	0.01022	0.695443	NA	0.765667
GCST90277331	gastric cancer	10	0.0389605	0.199145	0.84977	1.04 (0.70-1.54)	-0.0630434	0.0667405	0.344861	0.94 (0.82-1.07)	-0.0617117	0.0489366	0.20729	0.94 (0.85-1.03)	-0.0707499	0.0621157	0.28411	0.93 (0.82-1.05)	-0.116153	0.103448	0.290572	0.89 (0.73-1.09)	TRUE	1.72e-74	9580.33	36.4852	0.054212	12.5607	9	0.183514	-0.014642	0.0276057	0.61024	NA	0.247333
GCST90277332	gastric cancer	4	0.0126159	0.16316	0.945407	1.01 (0.74-1.39)	-0.0105156	0.08771	0.904569	0.99 (0.83-1.18)	-0.0298225	0.0737148	0.685796	0.97 (0.84-1.12)	-0.00608323	0.0897294	0.950214	0.99 (0.83-1.19)	0.0334075	0.11902	0.797194	1.03 (0.82-1.31)	TRUE	3.46e-19	2390.35	21.7065	0.0140955	1.28442	3	0.732835	-0.00627554	0.0215244	0.798085	NA	0.8
GCST90277333	gastric cancer	24	-0.043121	0.0687336	0.536879	0.96 (0.84-1.10)	-0.0491823	0.04935	0.318958	0.95 (0.86-1.05)	-0.0116895	0.0314161	0.709828	0.99 (0.93-1.05)	-0.0697958	0.0606203	0.261413	0.93 (0.83-1.05)	-0.0571261	0.0889267	0.526969	0.94 (0.79-1.12)	TRUE	3.23e-112	14230.5	22.5628	0.0784637	19.5938	23	0.666276	0.00474583	0.00923058	0.612279	NA	0.539333
GCST90277334	gastric cancer	8	-0.0107609	0.174732	0.952893	0.99 (0.70-1.39)	0.00661651	0.0834127	0.936776	1.01 (0.85-1.19)	0.0401333	0.0625979	0.52144	1.04 (0.92-1.18)	-0.0106227	0.10284	0.920627	0.99 (0.81-1.21)	-0.0923045	0.137981	0.524957	0.91 (0.70-1.19)	TRUE	9.58e-36	4580.02	21.6074	0.0266686	6.75119	7	0.455238	0.00755298	0.0240186	0.763817	NA	0.466333
GCST90277335	gastric cancer	12	0.275363	0.160932	0.117858	1.32 (0.96-1.81)	-0.00294519	0.0779037	0.969843	1.00 (0.86-1.16)	0.0390739	0.0511525	0.444944	1.04 (0.94-1.15)	-0.106714	0.152972	0.499903	0.90 (0.67-1.21)	-0.106714	0.139734	0.461114	0.90 (0.68-1.18)	TRUE	4.95e-57	8094.6	23.0234	0.0461923	11.4833	11	0.40371	-0.0298983	0.0193071	0.152528	NA	0.294667
GCST90277336	gastric cancer	15	0.00446529	0.0779847	0.95521	1.00 (0.86-1.17)	-0.0127075	0.0483358	0.792628	0.99 (0.90-1.09)	-0.0104827	0.0381436	0.783452	0.99 (0.92-1.07)	-0.013981	0.0518201	0.791252	0.99 (0.89-1.09)	-0.0455917	0.0881392	0.613044	0.96 (0.80-1.14)	TRUE	4.65e-137	16996	43.8721	0.0923056	12.7848	14	0.543537	-0.0024088	0.010961	0.829471	NA	0.639
GCST90277337	gastric cancer	20	-0.0505482	0.197549	0.800947	0.95 (0.65-1.40)	0.0039787	0.0572297	0.944574	1.00 (0.90-1.12)	-0.0213381	0.0417513	0.609299	0.98 (0.90-1.06)	0.0121222	0.0884094	0.892383	1.01 (0.85-1.20)	-0.00267463	0.0943205	0.977673	1.00 (0.83-1.20)	TRUE	2.82e-104	13019.9	25.2278	0.0722707	17.2157	19	0.575257	0.00337334	0.0222986	0.881437	NA	0.584667
GCST90277338	gastric cancer	13	0.0120951	0.140148	0.932777	1.01 (0.77-1.33)	-0.0238153	0.0662389	0.719194	0.98 (0.86-1.11)	-0.0652874	0.0488107	0.181039	0.94 (0.85-1.03)	-0.014367	0.0707964	0.842587	0.99 (0.86-1.13)	-0.203633	0.126943	0.134666	0.82 (0.64-1.05)	TRUE	5.86e-92	11801.8	34.4826	0.0659546	13.6207	12	0.325583	-0.0100972	0.0169048	0.5624	rs2985394	0.035
GCST90277339	gastric cancer	10	-0.0369535	0.13166	0.786083	0.96 (0.74-1.25)	0.0164455	0.0604925	0.785729	1.02 (0.90-1.14)	0.0545352	0.0491251	0.266943	1.06 (0.96-1.16)	0.0180863	0.0590086	0.766194	1.02 (0.91-1.14)	0.00362619	0.088328	0.968149	1.00 (0.84-1.19)	TRUE	8.57e-90	11252.3	43.881	0.0630774	11.3931	9	0.249723	0.014512	0.0188582	0.46369	NA	0.356
GCST90277340	gastric cancer	17	-0.0263172	0.0888214	0.771069	0.97 (0.82-1.16)	-0.0175748	0.0551388	0.749926	0.98 (0.88-1.09)	-0.0305502	0.038734	0.430276	0.97 (0.90-1.05)	-0.015979	0.0557879	0.778229	0.98 (0.88-1.10)	-0.015979	0.0946263	0.86802	0.98 (0.82-1.18)	TRUE	6.96e-139	16737.5	39.1253	0.0910294	12.5879	16	0.702617	-0.00055185	0.0104203	0.958463	NA	0.750333
GCST90277341	gastric cancer	12	0.345938	0.178238	0.0809636	1.41 (1.00-2.00)	0.0372718	0.0755665	0.621849	1.04 (0.90-1.20)	0.0536957	0.0530102	0.311093	1.06 (0.95-1.17)	0.0596718	0.0733926	0.433436	1.06 (0.92-1.23)	-0.113088	0.128218	0.396641	0.89 (0.69-1.15)	TRUE	2.23e-63	7748.09	26.5491	0.0443022	18.5408	11	0.0698504	-0.0407895	0.0232649	0.110098	NA	0.0903333
GCST90277342	gastric cancer	11	0.111968	0.290405	0.708777	1.12 (0.63-1.98)	0.0125959	0.0916942	0.89074	1.01 (0.85-1.21)	-0.064831	0.0664096	0.328951	0.94 (0.82-1.07)	-0.0119986	0.0931774	0.900091	0.99 (0.82-1.19)	-0.0293741	0.131135	0.827268	0.97 (0.75-1.26)	TRUE	5.71e-59	7437.7	25.9824	0.0426029	8.00121	10	0.628718	-0.0202895	0.0324437	0.547253	NA	0.619
GCST90277343	gastric cancer	11	-0.0596193	0.16189	0.721184	0.94 (0.69-1.29)	0.0229313	0.066987	0.732107	1.02 (0.90-1.17)	0.0109817	0.051466	0.831032	1.01 (0.91-1.12)	0.0362504	0.0809405	0.663797	1.04 (0.88-1.22)	0.0362504	0.0935573	0.706529	1.04 (0.86-1.25)	TRUE	3.98e-67	8037.86	29.9975	0.0458833	12.2073	10	0.271422	0.00882641	0.0188364	0.650509	NA	0.344333
GCST90277344	gastric cancer	11	0.0686233	0.174476	0.703245	1.07 (0.76-1.51)	0.0297089	0.0710314	0.675765	1.03 (0.90-1.18)	0.0208009	0.0528195	0.693721	1.02 (0.92-1.13)	-0.00151973	0.0805168	0.985312	1.00 (0.85-1.17)	0.0110019	0.105707	0.919164	1.01 (0.82-1.24)	TRUE	1.33e-67	9148.52	29.0967	0.0518951	5.6252	10	0.845708	-0.00577767	0.0200902	0.780176	NA	0.850333
GCST90277345	gastric cancer	17	-0.0206914	0.0493291	0.680828	0.98 (0.89-1.08)	-0.0397547	0.0310214	0.200009	0.96 (0.90-1.02)	-0.0482899	0.0236306	0.0409994	0.95 (0.91-1.00)	-0.0347431	0.0322588	0.297445	0.97 (0.91-1.03)	-0.0122608	0.0459568	0.793039	0.99 (0.90-1.08)	TRUE	2.25e-241	38805.2	62.2759	0.188437	8.48131	16	0.93323	-0.00637327	0.00999936	0.533494	NA	0.932333
GCST90277346	gastric cancer	16	-0.0440189	0.0470539	0.365388	0.96 (0.87-1.05)	-0.0431057	0.0333529	0.196215	0.96 (0.90-1.02)	-0.0390799	0.0257777	0.12951	0.96 (0.91-1.01)	-0.0430208	0.0298809	0.170484	0.96 (0.90-1.02)	-0.0796878	0.0557337	0.173273	0.92 (0.83-1.03)	TRUE	1.97e-280	37113.6	79.3491	0.181716	9.44644	15	0.853043	0.00116683	0.0092999	0.901938	NA	0.870667
GCST90277347	gastric cancer	14	0.0133716	0.110601	0.905771	1.01 (0.82-1.26)	0.053174	0.0549318	0.333044	1.05 (0.95-1.17)	0.00136892	0.0402736	0.972885	1.00 (0.93-1.08)	0.0446166	0.0576074	0.452495	1.05 (0.93-1.17)	0.0328637	0.0772278	0.677401	1.03 (0.89-1.20)	TRUE	2.25e-135	16461.1	46.6098	0.0896608	14.7278	13	0.324654	-0.00182549	0.0153936	0.907564	rs633695, rs805292	0.008
GCST90277348	gastric cancer	12	-0.0728735	0.0855878	0.414445	0.93 (0.79-1.10)	-0.00617731	0.0442998	0.8891	0.99 (0.91-1.08)	-0.0276852	0.0295939	0.349529	0.97 (0.92-1.03)	0.0268473	0.059619	0.66123	1.03 (0.91-1.15)	-0.022935	0.0686962	0.744762	0.98 (0.85-1.12)	TRUE	4.45e-233	28642.5	90.3923	0.146307	14.7499	11	0.194235	0.00955604	0.0164832	0.574916	NA	0.127
GCST90277349	gastric cancer	15	-0.0230021	0.0953731	0.813178	0.98 (0.81-1.18)	-0.0637995	0.046991	0.174561	0.94 (0.86-1.03)	-0.0759065	0.0346577	0.0285115	0.93 (0.87-0.99)	-0.053143	0.0477388	0.28437	0.95 (0.86-1.04)	-0.0716205	0.0727603	0.341657	0.93 (0.81-1.07)	TRUE	2.53e-160	20000.1	50.916	0.106878	16.2198	14	0.300136	-0.00840728	0.0138888	0.555383	NA	0.362333
GCST90277350	gastric cancer	7	0.461132	0.536524	0.429348	1.59 (0.55-4.54)	0.0433452	0.104154	0.67729	1.04 (0.85-1.28)	-0.00330579	0.0746906	0.964697	1.00 (0.86-1.15)	0.0748563	0.120849	0.558412	1.08 (0.85-1.37)	-0.317897	0.208094	0.177456	0.73 (0.48-1.09)	TRUE	1.28e-39	6126.69	27.5884	0.035358	12.5342	6	0.0510582	-0.0543945	0.0615031	0.416966	NA	0.0896667
GCST90277351	gastric cancer	17	-0.00680884	0.100887	0.947083	0.99 (0.82-1.21)	-0.00264305	0.0592083	0.964394	1.00 (0.89-1.12)	0.0473912	0.0416652	0.255359	1.05 (0.97-1.14)	0.00509243	0.0635643	0.93714	1.01 (0.89-1.14)	0.00236923	0.102338	0.981816	1.00 (0.82-1.23)	TRUE	5.9e-111	13507.9	31.8029	0.0747772	17.5762	16	0.349288	0.00718313	0.011995	0.558213	NA	0.371667
GCST90277352	gastric cancer	6	0.0914731	0.248191	0.731133	1.10 (0.67-1.78)	0.0450188	0.120659	0.709067	1.05 (0.83-1.33)	0.0366068	0.0882589	0.678313	1.04 (0.87-1.23)	0.099044	0.134193	0.493633	1.10 (0.85-1.44)	0.130132	0.160577	0.454535	1.14 (0.83-1.56)	TRUE	2.63e-25	3746.99	20.5626	0.0219233	10.6606	5	0.0585412	-0.0107254	0.0396837	0.800322	NA	0.152
GCST90277353	gastric cancer	18	0.0894332	0.114561	0.446399	1.09 (0.87-1.37)	0.0183562	0.0543669	0.735638	1.02 (0.92-1.13)	-0.0145965	0.0400476	0.7155	0.99 (0.91-1.07)	0.023011	0.0746308	0.761576	1.02 (0.88-1.18)	0.0436326	0.0918729	0.640886	1.04 (0.87-1.25)	TRUE	8.57e-103	12957.4	27.646	0.0719485	16.3487	17	0.499264	-0.0137674	0.0142046	0.346858	NA	0.522
GCST90277354	gastric cancer	14	-0.0607736	0.103164	0.566722	0.94 (0.77-1.15)	-0.0183217	0.060384	0.76157	0.98 (0.87-1.11)	0.0368296	0.0440672	0.403289	1.04 (0.95-1.13)	-0.0263702	0.061924	0.677185	0.97 (0.86-1.10)	-0.0457879	0.103711	0.66611	0.96 (0.78-1.17)	TRUE	2.58e-108	12935.2	37.3398	0.0718345	10.2765	13	0.671179	0.0134056	0.0128117	0.316014	NA	0.672667
GCST90277355	gastric cancer	13	-0.0605666	0.222037	0.790077	0.94 (0.61-1.45)	-0.106098	0.090824	0.242739	0.90 (0.75-1.07)	-0.0421647	0.0571564	0.460692	0.96 (0.86-1.07)	-0.161685	0.0911766	0.101534	0.85 (0.71-1.02)	-0.20483	0.152781	0.204852	0.81 (0.60-1.10)	TRUE	3.87e-60	7824.87	23.1812	0.0447216	20.2341	12	0.0627854	0.00237803	0.0268889	0.931117	rs2568223	0.011
GCST90277356	gastric cancer	7	-0.059563	0.197305	0.774895	0.94 (0.64-1.39)	-0.0574933	0.0923766	0.533692	0.94 (0.79-1.13)	-0.0581308	0.0722241	0.420896	0.94 (0.82-1.09)	-0.0512394	0.0984577	0.621408	0.95 (0.78-1.15)	-0.0464736	0.103903	0.670366	0.95 (0.78-1.17)	TRUE	5.31e-43	5475.95	28.8979	0.031721	2.13445	6	0.906927	0.000189323	0.0242722	0.994078	NA	0.946
GCST90277357	gastric cancer	15	-0.0236176	0.110458	0.834009	0.98 (0.79-1.21)	0.0544648	0.0603621	0.366897	1.06 (0.94-1.19)	0.0533744	0.0442676	0.227925	1.05 (0.97-1.15)	0.0322539	0.0558151	0.572529	1.03 (0.93-1.15)	-0.0797509	0.0899122	0.390069	0.92 (0.77-1.10)	TRUE	9.12e-86	10277.8	27.8002	0.0579306	10.7066	14	0.708912	0.0132781	0.0174531	0.46036	NA	0.737
GCST90277358	gastric cancer	14	-0.241192	0.139465	0.109349	0.79 (0.60-1.03)	-0.0890696	0.0633228	0.159547	0.91 (0.81-1.04)	-0.042897	0.0470571	0.361983	0.96 (0.87-1.05)	-0.09241	0.0685664	0.200759	0.91 (0.80-1.04)	-0.0260583	0.0917349	0.780838	0.97 (0.81-1.17)	TRUE	2.18e-68	8214.41	24.0284	0.046844	12.558	13	0.482503	0.0248437	0.0164484	0.156817	NA	0.544667
GCST90277359	gastric cancer	16	0.00261576	0.0920941	0.977742	1.00 (0.84-1.20)	-0.0104814	0.0463262	0.821006	0.99 (0.90-1.08)	-0.0239292	0.0331768	0.470748	0.98 (0.91-1.04)	-0.00835216	0.044122	0.852398	0.99 (0.91-1.08)	0.020335	0.0620599	0.747692	1.02 (0.90-1.15)	TRUE	1.18e-132	16570.3	39.9429	0.0902019	19.0528	15	0.21135	-0.00435863	0.013732	0.755619	NA	0.287333
GCST90277360	gastric cancer	11	-0.248504	0.445675	0.590721	0.78 (0.33-1.87)	0.00640161	0.0754479	0.932382	1.01 (0.87-1.17)	0.0568549	0.056737	0.316306	1.06 (0.95-1.18)	-0.00201896	0.100891	0.984428	1.00 (0.82-1.22)	0.0474381	0.116204	0.691707	1.05 (0.84-1.32)	TRUE	1.83e-60	9165.2	26.209	0.0519848	8.78749	10	0.552383	0.0322954	0.0467521	0.507127	NA	0.573
GCST90277361	gastric cancer	19	-0.106146	0.106006	0.330712	0.90 (0.73-1.11)	-0.0441533	0.049348	0.370929	0.96 (0.87-1.05)	-0.0158207	0.0368278	0.667497	0.98 (0.92-1.06)	-0.0596294	0.0579037	0.316743	0.94 (0.84-1.06)	-0.0677348	0.0651073	0.311948	0.93 (0.82-1.06)	TRUE	1.96e-172	20901.2	42.3346	0.111158	12.8868	18	0.798253	0.0126224	0.013891	0.376223	NA	0.803
GCST90277362	gastric cancer	20	-0.00844311	0.0703553	0.905807	0.99 (0.86-1.14)	-0.0353067	0.0409696	0.38881	0.97 (0.89-1.05)	-0.0331256	0.0285789	0.246417	0.97 (0.91-1.02)	-0.0429604	0.0397571	0.293414	0.96 (0.89-1.04)	-0.11138	0.0677973	0.116862	0.89 (0.78-1.02)	TRUE	0	40029	71.7463	0.193232	30.0616	19	0.0510201	-0.00457305	0.0111142	0.685594	NA	0.0743333
GCST90277363	gastric cancer	18	0.00540312	0.0666262	0.936371	1.01 (0.88-1.15)	0.0149259	0.0420841	0.722838	1.02 (0.93-1.10)	0.0166782	0.0321428	0.603846	1.02 (0.95-1.08)	0.0148481	0.0445626	0.74306	1.01 (0.93-1.11)	0.0281168	0.0739069	0.708334	1.03 (0.89-1.19)	TRUE	1.27e-224	28877.7	57.1446	0.147331	11.1558	17	0.848348	0.00196082	0.0101493	0.849235	NA	0.868667
GCST90277364	gastric cancer	19	-0.049489	0.0657812	0.462145	0.95 (0.84-1.08)	-0.010847	0.0438005	0.804409	0.99 (0.91-1.08)	-0.00415828	0.0304496	0.891376	1.00 (0.94-1.06)	-0.0181627	0.0459278	0.697149	0.98 (0.90-1.07)	-0.0149583	0.06467	0.819689	0.99 (0.87-1.12)	TRUE	7.97e-245	30211.7	58.9457	0.153095	17.9859	18	0.456585	0.00802974	0.0102985	0.446287	NA	0.465667
GCST90277365	gastric cancer	15	-0.0565263	0.143733	0.700491	0.95 (0.71-1.25)	-0.0238585	0.0601591	0.69167	0.98 (0.87-1.10)	-0.0274068	0.0425982	0.519979	0.97 (0.90-1.06)	-0.0426517	0.0802753	0.603527	0.96 (0.82-1.12)	-0.0755502	0.09606	0.44469	0.93 (0.77-1.12)	TRUE	2.54e-116	13940.1	37.0106	0.0769858	11.117	14	0.676823	0.00377644	0.0178029	0.835299	NA	0.690333
GCST90277366	gastric cancer	15	-0.344322	0.12841	0.0188496	0.71 (0.55-0.91)	-0.102256	0.055818	0.0669588	0.90 (0.81-1.01)	-0.0611225	0.0372176	0.100528	0.94 (0.87-1.01)	-0.0775618	0.0717783	0.29815	0.93 (0.80-1.07)	-0.0893896	0.0757479	0.257627	0.91 (0.79-1.06)	TRUE	1.68e-91	12208.3	29.6151	0.0680722	15.3244	14	0.356342	0.0449597	0.0195109	0.0383486	NA	0.33
GCST90277367	gastric cancer	16	0.0119726	0.101311	0.907606	1.01 (0.83-1.23)	-0.00292124	0.0541119	0.956947	1.00 (0.90-1.11)	0.00694616	0.037989	0.854918	1.01 (0.93-1.08)	-0.0129507	0.0688809	0.853384	0.99 (0.86-1.13)	-0.00963996	0.0794679	0.905059	0.99 (0.85-1.16)	TRUE	4.27e-74	10565.3	21.9332	0.0594547	8.74064	15	0.890683	-0.000739734	0.013822	0.958075	NA	0.844333
GCST90277368	gastric cancer	16	0.0368336	0.0599315	0.548681	1.04 (0.92-1.17)	0.0118632	0.0456904	0.795139	1.01 (0.93-1.11)	0.0244214	0.0341894	0.475043	1.02 (0.96-1.10)	0.0121649	0.0454578	0.792646	1.01 (0.93-1.11)	0.108395	0.0790119	0.190271	1.11 (0.95-1.30)	TRUE	4.11e-164	19784.7	49.1197	0.105849	11.3388	15	0.728232	-0.00248786	0.009866	0.804578	NA	0.742667
GCST90277369	gastric cancer	15	0.0316753	0.112357	0.782445	1.03 (0.83-1.29)	0.0170764	0.0596957	0.774834	1.02 (0.90-1.14)	0.0139677	0.0445498	0.753877	1.01 (0.93-1.11)	0.00944114	0.079611	0.907284	1.01 (0.86-1.18)	-0.0315028	0.0951026	0.745361	0.97 (0.80-1.17)	TRUE	4.36e-94	13088.7	30.3386	0.0726248	17.6428	14	0.223537	-0.0025031	0.0140912	0.861748	NA	0.267333
GCST90277370	gastric cancer	19	-0.0889764	0.187379	0.640939	0.91 (0.63-1.32)	0.0292581	0.074859	0.695914	1.03 (0.89-1.19)	0.0550968	0.0534686	0.302798	1.06 (0.95-1.17)	0.0375208	0.118415	0.754997	1.04 (0.82-1.31)	-0.000200734	0.137094	0.998848	1.00 (0.76-1.31)	TRUE	2.75e-98	11978.1	25.343	0.0668739	18.7816	18	0.405385	0.0142162	0.0176701	0.432196	NA	0.424667
GCST90277371	gastric cancer	14	-0.0199914	0.0570368	0.732039	0.98 (0.88-1.10)	-0.0251794	0.0367346	0.493065	0.98 (0.91-1.05)	-0.0102855	0.0378372	0.785748	0.99 (0.92-1.07)	-0.0217634	0.0340721	0.534081	0.98 (0.92-1.05)	-0.0259727	0.0909134	0.77962	0.97 (0.82-1.16)	TRUE	2.23e-82	10103.1	29.3754	0.057002	22.4428	13	0.0488696	0.00266627	0.0113575	0.818354	NA	0.157667
GCST90277372	gastric cancer	20	0.0562935	0.153401	0.717921	1.06 (0.78-1.43)	0.0363425	0.0629728	0.563862	1.04 (0.92-1.17)	0.0455986	0.0447679	0.308414	1.05 (0.96-1.14)	-0.00794106	0.083514	0.925242	0.99 (0.84-1.17)	0.0970733	0.103321	0.359249	1.10 (0.90-1.35)	TRUE	3.1e-96	11466.4	23.099	0.0642003	9.72048	19	0.959507	-0.00116887	0.0160358	0.942697	NA	0.956667
GCST90277373	gastric cancer	12	-0.021733	0.117144	0.856527	0.98 (0.78-1.23)	0.00802352	0.0561227	0.886319	1.01 (0.90-1.13)	0.0359714	0.0418955	0.390562	1.04 (0.95-1.13)	-0.00533249	0.0642234	0.935319	0.99 (0.88-1.13)	0.00904068	0.0810851	0.913231	1.01 (0.86-1.18)	TRUE	1.18e-72	8652.56	29.6124	0.0492199	10.5469	11	0.481962	0.00874999	0.0165566	0.608687	NA	0.503667
GCST90277374	gastric cancer	15	0.0168334	0.107728	0.878229	1.02 (0.82-1.26)	0.0522779	0.0642882	0.416115	1.05 (0.93-1.20)	0.0422553	0.0455613	0.353699	1.04 (0.95-1.14)	0.0636158	0.0692518	0.373852	1.07 (0.93-1.22)	0.0636158	0.0860812	0.472104	1.07 (0.90-1.26)	TRUE	1.23e-124	14962.2	39.8655	0.0821668	11.4783	14	0.648122	0.003288	0.0126257	0.798619	NA	0.695667
GCST90277375	gastric cancer	10	0.166767	0.389849	0.680097	1.18 (0.55-2.54)	-0.086304	0.0865002	0.31841	0.92 (0.77-1.09)	-0.0736667	0.0616253	0.231932	0.93 (0.82-1.05)	-0.114395	0.0912412	0.241514	0.89 (0.75-1.07)	-0.227786	0.115272	0.0795603	0.80 (0.64-1.00)	TRUE	1.17e-61	7391.28	30.4323	0.0423482	11.1061	9	0.268505	-0.0268903	0.042874	0.548011	NA	0.324
GCST90277376	gastric cancer	17	-0.185764	0.246427	0.462621	0.83 (0.51-1.35)	0.0453667	0.0855673	0.595982	1.05 (0.88-1.24)	0.0152628	0.0760642	0.840967	1.02 (0.87-1.18)	0.0117089	0.117647	0.921957	1.01 (0.80-1.27)	0.036081	0.133018	0.789668	1.04 (0.80-1.35)	TRUE	4.82e-81	10056.4	24.03	0.0567534	28.1703	16	0.0301696	0.0216959	0.0252747	0.404179	rs115478735	0.005
GCST90277377	gastric cancer	17	0.0718056	0.120862	0.561292	1.07 (0.85-1.36)	0.0284487	0.0650824	0.662025	1.03 (0.91-1.17)	0.0120172	0.0487679	0.805361	1.01 (0.92-1.11)	0.024915	0.0796118	0.758357	1.03 (0.88-1.20)	-0.000579155	0.114446	0.996025	1.00 (0.80-1.25)	TRUE	6.18e-120	14421.7	33.8722	0.0794342	13.1923	16	0.658646	-0.00697959	0.0129097	0.596687	NA	0.674333
GCST90277378	gastric cancer	24	-0.0830024	0.13713	0.551183	0.92 (0.70-1.20)	-0.110201	0.0647447	0.0887386	0.90 (0.79-1.02)	-0.0208929	0.0434849	0.630898	0.98 (0.90-1.07)	-0.144644	0.0722275	0.057144	0.87 (0.75-1.00)	-0.0870398	0.103693	0.409886	0.92 (0.75-1.12)	TRUE	2.03e-111	13893.6	23.0103	0.0767485	32.6103	23	0.0881025	0.00728694	0.0148552	0.628616	NA	0.0906667
GCST90277379	gastric cancer	16	0.0515219	0.102485	0.622973	1.05 (0.86-1.29)	-0.0250615	0.0494862	0.612551	0.98 (0.89-1.07)	-0.0254302	0.0379268	0.502534	0.97 (0.91-1.05)	-0.049591	0.0715284	0.498713	0.95 (0.83-1.09)	-0.0557736	0.0799138	0.495903	0.95 (0.81-1.11)	TRUE	1.72e-74	10271.7	22.0384	0.0578978	7.33283	15	0.947747	-0.0109063	0.0134939	0.432472	NA	0.952333
GCST90277380	gastric cancer	16	0.132787	0.146599	0.380375	1.14 (0.86-1.52)	-0.0733064	0.0557313	0.188391	0.93 (0.83-1.04)	-0.0415481	0.0403088	0.30266	0.96 (0.89-1.04)	-0.089334	0.0700033	0.221313	0.91 (0.80-1.05)	-0.115109	0.0769307	0.155325	0.89 (0.77-1.04)	TRUE	6.57e-77	11989.5	22.88	0.0669333	12.9912	15	0.602979	-0.0248607	0.0200997	0.236481	NA	0.634
GCST90277381	gastric cancer	10	-0.010858	0.0532003	0.843375	0.99 (0.89-1.10)	0.0328229	0.0448868	0.464634	1.03 (0.95-1.13)	0.0747472	0.0344934	0.0302352	1.08 (1.01-1.15)	0.0319849	0.0380798	0.422691	1.03 (0.96-1.11)	0.144208	0.117427	0.250571	1.16 (0.92-1.45)	TRUE	2.49e-43	6743.72	21.2613	0.0387814	11.2409	9	0.259555	0.022012	0.0104147	0.067498	NA	0.378333
GCST90277382	gastric cancer	18	-0.0238285	0.101147	0.816745	0.98 (0.80-1.19)	-0.0506248	0.056952	0.374055	0.95 (0.85-1.06)	-0.0645866	0.0422425	0.126277	0.94 (0.86-1.02)	-0.0605007	0.068601	0.390119	0.94 (0.82-1.08)	-0.122329	0.0893602	0.188836	0.88 (0.74-1.05)	TRUE	2.19e-85	10522.6	23.1707	0.0592285	13.5375	17	0.69953	-0.00581067	0.0131022	0.663351	NA	0.723333
GCST90277383	gastric cancer	16	0.00174234	0.15734	0.991321	1.00 (0.74-1.36)	-0.015998	0.0626394	0.798415	0.98 (0.87-1.11)	-0.0116392	0.046596	0.802751	0.99 (0.90-1.08)	-0.0388903	0.065798	0.563285	0.96 (0.85-1.09)	-0.00223597	0.0914237	0.98081	1.00 (0.83-1.19)	TRUE	3.29e-83	10199.9	25.5181	0.0575165	16.4743	15	0.351249	-0.00189725	0.0211262	0.929714	NA	0.381
GCST90277384	gastric cancer	21	-0.0984297	0.154317	0.53119	0.91 (0.67-1.23)	-0.0161682	0.0547226	0.767645	0.98 (0.88-1.10)	0.0118447	0.0405082	0.769979	1.01 (0.93-1.10)	-0.0341502	0.0650379	0.605299	0.97 (0.85-1.10)	-0.0373403	0.0742146	0.620362	0.96 (0.83-1.11)	TRUE	1.43e-107	13776.4	24.9564	0.0761506	23.1124	20	0.283309	0.0146569	0.0196578	0.465033	NA	0.299667
GCST90277385	gastric cancer	15	-0.210604	0.127742	0.123158	0.81 (0.63-1.04)	-0.0718789	0.0599678	0.230673	0.93 (0.83-1.05)	-0.0527956	0.0429966	0.219484	0.95 (0.87-1.03)	-0.0984197	0.0630609	0.140907	0.91 (0.80-1.03)	-0.0934833	0.0900273	0.316692	0.91 (0.76-1.09)	TRUE	1.4e-65	9636.68	21.3056	0.0545135	15.9633	14	0.315622	0.0231774	0.0175728	0.209953	NA	0.387667
GCST90277386	gastric cancer	9	-0.146855	0.244238	0.566608	0.86 (0.53-1.39)	-0.0650204	0.0766601	0.396347	0.94 (0.81-1.09)	-0.0208191	0.0513648	0.685243	0.98 (0.89-1.08)	-0.0754002	0.0899032	0.425996	0.93 (0.78-1.11)	-0.0783677	0.106652	0.483443	0.92 (0.75-1.14)	TRUE	2.3e-46	6483.52	25.3153	0.0373407	13.2914	8	0.102209	0.0169121	0.0314238	0.607123	NA	0.130667
GCST90277387	gastric cancer	15	-0.011015	0.101121	0.914922	0.99 (0.81-1.21)	-0.104526	0.0574601	0.0688955	0.90 (0.80-1.01)	-0.0592649	0.0433078	0.171169	0.94 (0.87-1.03)	-0.111846	0.0753869	0.160068	0.89 (0.77-1.04)	-0.111846	0.0868344	0.218614	0.89 (0.75-1.06)	TRUE	1.7e-77	9313.73	25.2266	0.0527829	10.9699	14	0.688402	-0.00694687	0.0131563	0.606377	NA	0.717
GCST90277388	gastric cancer	12	0.194281	0.168518	0.275772	1.21 (0.87-1.69)	-0.0788467	0.0717345	0.271704	0.92 (0.80-1.06)	-0.0202389	0.0503868	0.687927	0.98 (0.89-1.08)	-0.111904	0.0848665	0.214101	0.89 (0.76-1.06)	-0.129248	0.121047	0.308506	0.88 (0.69-1.11)	TRUE	1.09e-66	8047.53	27.588	0.0459359	15.4191	11	0.164104	-0.0281987	0.0208216	0.205451	NA	0.173667
GCST90277389	gastric cancer	18	0.00188271	0.106812	0.986155	1.00 (0.81-1.24)	0.0151218	0.0490718	0.757963	1.02 (0.92-1.12)	0.0176286	0.035273	0.617232	1.02 (0.95-1.09)	0.000117766	0.051359	0.998197	1.00 (0.90-1.11)	-0.0357385	0.0746916	0.638404	0.96 (0.83-1.12)	TRUE	8.69e-106	13014	28.9012	0.0722402	23.467	17	0.134655	0.00250991	0.0156073	0.874251	NA	0.166333
GCST90277390	gastric cancer	22	-0.0208834	0.106756	0.846884	0.98 (0.79-1.21)	0.00355406	0.0501934	0.943551	1.00 (0.91-1.11)	0.0243424	0.0344215	0.479451	1.02 (0.96-1.10)	0.00400403	0.0463792	0.93202	1.00 (0.92-1.10)	0.0494089	0.0648795	0.454797	1.05 (0.93-1.19)	TRUE	9.1e-124	15379.9	27.5941	0.0842674	29.6397	21	0.09947	0.00661865	0.0143833	0.650364	NA	0.115667
GCST90277391	gastric cancer	13	0.11022	0.0524222	0.0593378	1.12 (1.01-1.24)	0.0450566	0.0483935	0.351829	1.05 (0.95-1.15)	0.0285391	0.0306573	0.351901	1.03 (0.97-1.09)	0.0627267	0.0438584	0.178175	1.06 (0.98-1.16)	-0.0748804	0.0896399	0.419844	0.93 (0.78-1.11)	TRUE	4.8e-74	11450.5	27.2367	0.0641171	13.1541	12	0.357941	-0.0181438	0.00944565	0.0810339	NA	0.311667
GCST90277392	gastric cancer	11	-0.00821212	0.170064	0.962541	0.99 (0.71-1.38)	0.0357891	0.0716889	0.617619	1.04 (0.90-1.19)	0.00124768	0.0497491	0.979992	1.00 (0.91-1.10)	0.0766417	0.0857578	0.392483	1.08 (0.91-1.28)	0.113357	0.114653	0.346131	1.12 (0.89-1.40)	TRUE	9.86e-54	8028.2	22.9833	0.0458306	5.70718	10	0.839235	0.0011931	0.0205108	0.954885	NA	0.821
GCST90277393	gastric cancer	14	-0.120505	0.106899	0.281661	0.89 (0.72-1.09)	-0.067665	0.0579379	0.242852	0.93 (0.83-1.05)	-0.0642293	0.0431126	0.136275	0.94 (0.86-1.02)	-0.0713511	0.0577869	0.238785	0.93 (0.83-1.04)	-0.0238856	0.0843214	0.781432	0.98 (0.83-1.15)	TRUE	9.53e-83	9991.05	28.954	0.0564053	12.4626	13	0.490126	0.00826295	0.0143481	0.575329	NA	0.565667
GCST90277394	gastric cancer	15	-0.136887	0.128333	0.305535	0.87 (0.68-1.12)	-0.0931215	0.0522273	0.0745856	0.91 (0.82-1.01)	-0.0473277	0.039753	0.233833	0.95 (0.88-1.03)	-0.0881764	0.0586348	0.154848	0.92 (0.82-1.03)	-0.0935148	0.0755593	0.236207	0.91 (0.79-1.06)	TRUE	8.52e-100	12280.8	32.7108	0.0684486	19.6145	14	0.142772	0.0135159	0.0179737	0.465459	NA	0.179333
GCST90277395	gastric cancer	9	0.0226043	0.109119	0.841787	1.02 (0.83-1.27)	-0.0612969	0.0591265	0.299872	0.94 (0.84-1.06)	-0.0620677	0.0440728	0.159042	0.94 (0.86-1.02)	-0.0465976	0.063125	0.481496	0.95 (0.84-1.08)	-0.0595967	0.0797399	0.47622	0.94 (0.81-1.10)	TRUE	2.15e-59	9485.48	31.4998	0.053704	8.54914	8	0.381744	-0.0149961	0.0174969	0.419777	NA	0.421667
GCST90277396	gastric cancer	14	-0.118133	0.113097	0.316825	0.89 (0.71-1.11)	-0.0607442	0.050601	0.229963	0.94 (0.85-1.04)	-0.00578845	0.0366995	0.874673	0.99 (0.93-1.07)	-0.0508665	0.0454824	0.283647	0.95 (0.87-1.04)	0.0112489	0.0775856	0.886945	1.01 (0.87-1.18)	TRUE	1.34e-90	11100.3	32.1015	0.062278	21.929	13	0.056471	0.0198421	0.0181433	0.295584	NA	0.0776667
GCST90277397	gastric cancer	19	-0.0853201	0.0864189	0.337348	0.92 (0.78-1.09)	-0.0697277	0.0508622	0.170402	0.93 (0.84-1.03)	-0.0332009	0.0349457	0.342077	0.97 (0.90-1.04)	-0.0772754	0.0533152	0.164424	0.93 (0.83-1.03)	-0.0869543	0.0807009	0.295491	0.92 (0.78-1.07)	TRUE	6.52e-137	16959	35.0934	0.0921229	27.6309	18	0.067898	0.0094933	0.0135561	0.493216	NA	0.085
GCST90277398	gastric cancer	19	-0.14622	0.118393	0.233614	0.86 (0.69-1.09)	-0.0635114	0.0549111	0.247426	0.94 (0.84-1.05)	0.00086781	0.0392198	0.982347	1.00 (0.93-1.08)	-0.0593667	0.0546579	0.291745	0.94 (0.85-1.05)	-0.00162265	0.0883383	0.985547	1.00 (0.84-1.19)	TRUE	7.38e-131	16149.1	33.5402	0.088111	26.3535	18	0.091945	0.0205888	0.0152461	0.194583	NA	0.0963333
GCST90277399	gastric cancer	17	-0.157341	0.123975	0.223732	0.85 (0.67-1.09)	-0.0534575	0.0583923	0.359935	0.95 (0.85-1.06)	-0.00129589	0.041722	0.975222	1.00 (0.92-1.08)	-0.0611339	0.058794	0.313893	0.94 (0.84-1.06)	0.0337707	0.0968455	0.731856	1.03 (0.86-1.25)	TRUE	1.92e-108	13227.2	31.1575	0.0733371	20.0396	16	0.218442	0.0205287	0.0151702	0.196027	rs1042034	0.0273333
GCST90277400	gastric cancer	14	-0.140107	0.123901	0.280235	0.87 (0.68-1.11)	-0.0200375	0.0563328	0.722066	0.98 (0.88-1.09)	0.00373162	0.0422258	0.92958	1.00 (0.92-1.09)	-0.0284471	0.0751401	0.711105	0.97 (0.84-1.13)	-0.0117243	0.0916068	0.900119	0.99 (0.83-1.18)	TRUE	4.23e-87	11409.7	30.0829	0.0639033	14.3736	13	0.348066	0.0194907	0.0157198	0.238718	NA	0.369
GCST90277401	gastric cancer	17	-0.267729	0.116325	0.0361157	0.77 (0.61-0.96)	-0.0633061	0.0570215	0.266907	0.94 (0.84-1.05)	-0.0231637	0.0408941	0.5711	0.98 (0.90-1.06)	-0.0691958	0.052517	0.206198	0.93 (0.84-1.03)	-0.0279899	0.0890044	0.757222	0.97 (0.82-1.16)	TRUE	6.83e-101	12709.7	29.245	0.0706705	24.3335	16	0.0824694	0.0339609	0.014902	0.0377261	NA	0.109
GCST90277402	gastric cancer	18	-0.175901	0.0979132	0.0913191	0.84 (0.69-1.02)	-0.071353	0.0505362	0.157974	0.93 (0.84-1.03)	-0.0354565	0.0368685	0.3362	0.97 (0.90-1.04)	-0.0713597	0.0500145	0.171752	0.93 (0.84-1.03)	-0.0384254	0.0726171	0.603543	0.96 (0.83-1.11)	TRUE	1.27e-126	15681.1	34.1723	0.0857765	22.7374	17	0.157996	0.0205337	0.0130079	0.134001	NA	0.199333
GCST90277403	gastric cancer	20	-0.161578	0.0981133	0.116936	0.85 (0.70-1.03)	-0.0791213	0.0525129	0.131887	0.92 (0.83-1.02)	-0.0627712	0.0373205	0.0925783	0.94 (0.87-1.01)	-0.0774449	0.0566279	0.187395	0.93 (0.83-1.03)	-0.0472577	0.0866195	0.591704	0.95 (0.80-1.13)	TRUE	3.34e-123	16587.8	29.4641	0.0902886	17.8715	19	0.531037	0.0134322	0.0123353	0.290555	NA	0.573
GCST90277404	gastric cancer	18	-0.149813	0.11546	0.212846	0.86 (0.69-1.08)	-0.0793521	0.0606187	0.190522	0.92 (0.82-1.04)	0.021733	0.0420034	0.60487	1.02 (0.94-1.11)	-0.0688973	0.0607044	0.27214	0.93 (0.83-1.05)	0.0484486	0.111101	0.668269	1.05 (0.84-1.31)	TRUE	1.56e-124	15380.5	33.8096	0.0842704	25.682	17	0.0804532	0.0231463	0.0140919	0.119986	NA	0.0903333
GCST90277405	gastric cancer	18	-0.0991462	0.103922	0.354252	0.91 (0.74-1.11)	-0.0704139	0.0537854	0.190479	0.93 (0.84-1.04)	-0.00143839	0.040025	0.971332	1.00 (0.92-1.08)	-0.050234	0.0566995	0.387995	0.95 (0.85-1.06)	0.0757061	0.111376	0.505825	1.08 (0.87-1.34)	TRUE	2.39e-128	15732.3	34.5592	0.0860321	21.7073	17	0.196239	0.0146205	0.0140089	0.312157	rs1042034	0.033
GCST90277406	gastric cancer	16	-0.139428	0.146138	0.356225	0.87 (0.65-1.16)	-0.0784491	0.0633605	0.215665	0.92 (0.82-1.05)	-0.0321715	0.0593091	0.587517	0.97 (0.86-1.09)	-0.0870786	0.0626773	0.185017	0.92 (0.81-1.04)	-0.145247	0.0997708	0.166057	0.86 (0.71-1.05)	TRUE	2.39e-106	13165.7	32.8572	0.0730209	25.5971	15	0.0424765	0.0143052	0.0177714	0.434303	NA	0.0603333
GCST90277407	gastric cancer	13	-0.14389	0.156165	0.37661	0.87 (0.64-1.18)	-0.100475	0.0706787	0.155149	0.90 (0.79-1.04)	-0.0821525	0.0505864	0.104375	0.92 (0.83-1.02)	-0.0894961	0.0724222	0.240194	0.91 (0.79-1.05)	-0.0692765	0.105299	0.523021	0.93 (0.76-1.15)	TRUE	3.52e-77	9461.02	29.277	0.053573	13.6632	12	0.322732	0.00711748	0.0168097	0.680153	NA	0.393
GCST90277408	gastric cancer	13	0.00718549	0.130012	0.956916	1.01 (0.78-1.30)	-0.0407912	0.0621181	0.511392	0.96 (0.85-1.08)	-0.0591033	0.0453292	0.192279	0.94 (0.86-1.03)	-0.0504022	0.0732094	0.504252	0.95 (0.82-1.10)	-0.0288462	0.0995209	0.776878	0.97 (0.80-1.18)	TRUE	9.82e-73	9222.1	27.5868	0.0522907	15.2395	12	0.2286	-0.00892502	0.0160072	0.588309	NA	0.284667
GCST90277409	gastric cancer	12	-0.180205	0.125528	0.181654	0.84 (0.65-1.07)	0.0190625	0.0600669	0.750975	1.02 (0.91-1.15)	0.0170144	0.0433274	0.694545	1.02 (0.93-1.11)	-0.0763527	0.0704083	0.301371	0.93 (0.81-1.06)	0.0751317	0.113452	0.521454	1.08 (0.86-1.35)	TRUE	2.35e-89	12299.9	35.5472	0.0685478	11.2447	11	0.422994	0.0301568	0.0180148	0.125073	NA	0.366667
GCST90277410	gastric cancer	12	-0.162105	0.134194	0.254842	0.85 (0.65-1.11)	-0.100631	0.0637076	0.114205	0.90 (0.80-1.02)	-0.0304003	0.0480539	0.526975	0.97 (0.88-1.07)	-0.0889801	0.073697	0.252607	0.91 (0.79-1.06)	-0.0492581	0.107687	0.656271	0.95 (0.77-1.18)	TRUE	3.87e-83	11918.3	32.5179	0.0665626	6.37382	11	0.847294	0.018397	0.0175016	0.317923	NA	0.797667
GCST90277411	gastric cancer	17	-0.114415	0.0966043	0.254697	0.89 (0.74-1.08)	0.00480458	0.057122	0.932968	1.00 (0.90-1.12)	0.0358172	0.0371525	0.335017	1.04 (0.96-1.11)	-0.009757	0.0555314	0.862732	0.99 (0.89-1.10)	0.13457	0.0881487	0.146379	1.14 (0.96-1.36)	TRUE	2.11e-102	15929.4	28.2706	0.0870162	13.5022	16	0.635743	0.0268163	0.0159176	0.112734	NA	0.599667
GCST90277412	gastric cancer	17	-0.219131	0.0911488	0.0295869	0.80 (0.67-0.96)	-0.0291424	0.0493221	0.554615	0.97 (0.88-1.07)	-0.00039621	0.0357319	0.991153	1.00 (0.93-1.07)	-0.0546651	0.052418	0.312511	0.95 (0.85-1.05)	-0.0341589	0.079124	0.67171	0.97 (0.83-1.13)	TRUE	2.92e-148	18129.4	41.6417	0.097859	18.4662	16	0.297313	0.0341245	0.0130818	0.0197599	rs3096698	0.008
GCST90277413	gastric cancer	20	-0.0712739	0.117289	0.550993	0.93 (0.74-1.17)	-0.110884	0.055529	0.0458399	0.90 (0.80-1.00)	-0.0835703	0.0398306	0.0358924	0.92 (0.85-0.99)	-0.104814	0.0610769	0.102404	0.90 (0.80-1.02)	-0.108007	0.0859739	0.224242	0.90 (0.76-1.06)	TRUE	5.46e-124	15215.8	29.9963	0.0834431	16.8278	19	0.601534	-0.00153616	0.0137819	0.912484	NA	0.635
GCST90277414	gastric cancer	21	-0.0863261	0.11744	0.471275	0.92 (0.73-1.15)	-0.0858314	0.0543354	0.114185	0.92 (0.83-1.02)	-0.054534	0.0378191	0.14931	0.95 (0.88-1.02)	-0.0935487	0.0663686	0.174038	0.91 (0.80-1.04)	-0.0777927	0.0787258	0.334885	0.93 (0.79-1.08)	TRUE	1.86e-113	14690.3	26.2805	0.0807943	22.917	20	0.292889	0.00416133	0.0143829	0.775467	NA	0.325667
GCST90277415	gastric cancer	15	-0.14501	0.144324	0.33335	0.87 (0.65-1.15)	-0.0552648	0.0524693	0.292213	0.95 (0.85-1.05)	-0.0147838	0.0398024	0.710317	0.99 (0.91-1.07)	-0.0600129	0.059	0.326331	0.94 (0.84-1.06)	-0.0434028	0.0687116	0.537783	0.96 (0.84-1.10)	TRUE	2.8e-98	15399.1	30.5889	0.0843638	11.124	14	0.676267	0.0188804	0.0201128	0.364986	NA	0.701667
GCST90277416	gastric cancer	12	-0.0492403	0.222208	0.829088	0.95 (0.62-1.47)	-0.0676843	0.0777887	0.384243	0.93 (0.80-1.09)	-0.0239675	0.0519868	0.644777	0.98 (0.88-1.08)	-0.0937335	0.109102	0.408599	0.91 (0.74-1.13)	-0.0632871	0.134644	0.647512	0.94 (0.72-1.22)	TRUE	7.51e-61	8181.69	24.9249	0.0466661	15.2055	11	0.17328	0.00307806	0.0259143	0.907803	NA	0.158667

## Sheet: Sheet6
The harmonising SNP between proteins and lipid species
	SNP	effect_allele.exposure	other_allele.exposure	effect_allele.outcome	other_allele.outcome	beta.exposure	beta.outcome	eaf.outcome	remove	palindromic	ambiguous	id.outcome	se.outcome	pval.outcome	samplesize.outcome	chr.outcome	pos.outcome	proxy.outcome	target_snp.outcome	proxy_snp.outcome	target_a1.outcome	target_a2.outcome	proxy_a1.outcome	proxy_a2.outcome	se.exposure	pval.exposure	samplesize.exposure	chr.exposure	pos.exposure	exposure	action	SNP_index	mr_keep
1	rs10819325	TTTTTG	TTTTTC	C	G	-0.0681	-0.00793974	0.938897	TRUE	FALSE	FALSE	GCST90277238	0.0346747	0.409443	7174	9	127986347	TRUE	rs10819325	rs7859847	G	C	A	G	0.011745	6.694e-09	35351	chr9	127984543	3234_23_CCDC80_URB	2	1	FALSE
2	rs143501783	C	T	C	T	0.2418	-0.406411	0.0025504	FALSE	FALSE	FALSE	GCST90277238	0.168978	0.00808376	7174	17	7897001	NA	NA	NA	NA	NA	NA	NA	0.037171	7.77e-11	35373	chr17	7897001	3234_23_CCDC80_URB	2	1	TRUE
3	rs2142306	C	T	C	T	0.0939	-0.0292659	0.369621	FALSE	FALSE	FALSE	GCST90277238	0.0176026	0.0481973	7174	8	133458388	NA	NA	NA	NA	NA	NA	NA	0.008224	3.392e-30	35374	chr8	133458388	3234_23_CCDC80_URB	2	1	TRUE
4	rs2978006	G	A	G	A	0.0694	-0.00821298	0.654981	FALSE	FALSE	FALSE	GCST90277238	0.0176536	0.320883	7174	8	133521519	NA	NA	NA	NA	NA	NA	NA	0.008464	2.411e-16	35373	chr8	133521519	3234_23_CCDC80_URB	2	1	TRUE
5	rs55714927	T	C	T	C	0.0783	-0.00682658	0.298609	FALSE	FALSE	FALSE	GCST90277238	0.018835	0.358511	7174	17	7169772	TRUE	rs55714927	rs62061425	T	C	G	A	0.010063	7.199e-15	35370	chr17	7176997	3234_23_CCDC80_URB	2	1	TRUE
6	rs6797920	G	A	G	A	0.0573	-0.0373438	0.606261	FALSE	FALSE	FALSE	GCST90277238	0.0172457	0.0151786	7174	3	112791263	NA	NA	NA	NA	NA	NA	NA	0.008514	1.698e-11	35362	chr3	112791263	3234_23_CCDC80_URB	2	1	TRUE
7	rs73669307	C	T	C	T	0.1006	-0.0293056	0.0659014	FALSE	FALSE	FALSE	GCST90277238	0.0339604	0.194087	7174	9	127956218	NA	NA	NA	NA	NA	NA	NA	0.012719	2.592e-15	35355	chr9	127956218	3234_23_CCDC80_URB	2	1	TRUE
8	rs767298	TAACTAAT	GAACTAAT	A	C	0.0547	-0.00733203	0.641858	TRUE	FALSE	FALSE	GCST90277238	0.0175723	0.338248	7174	7	7234953	NA	NA	NA	NA	NA	NA	NA	0.008255	3.44e-11	35362	chr7	7234953	3234_23_CCDC80_URB	2	1	FALSE
9	rs9845240	A	G	A	G	0.0937	-0.00242715	0.32768	FALSE	FALSE	FALSE	GCST90277238	0.0178832	0.44602	7174	3	112655985	NA	NA	NA	NA	NA	NA	NA	0.008481	2.238e-28	35354	chr3	112655985	3234_23_CCDC80_URB	2	1	TRUE
10	rs10935899	G	C	G	C	-0.0538	-0.00576605	0.192925	FALSE	TRUE	TRUE	GCST90277238	0.0213105	0.39336	7174	3	152767339	NA	NA	NA	NA	NA	NA	NA	0.009505	1.513e-08	35350	chr3	152767339	3004_67_PDCD1LG2_PD_L2	2	1	FALSE
11	rs12496730	C	G	C	G	-0.1258	0.00518424	0.434029	FALSE	TRUE	TRUE	GCST90277238	0.0168331	0.379049	7174	3	98684125	TRUE	rs12496730	rs11927405	C	G	T	C	0.008131	5.34e-54	35330	chr3	98688089	3004_67_PDCD1LG2_PD_L2	2	1	FALSE
12	rs1354034	C	T	C	T	0.047	-0.00292823	0.712723	FALSE	FALSE	FALSE	GCST90277238	0.0182602	0.436298	7174	3	56815721	NA	NA	NA	NA	NA	NA	NA	0.008325	1.647e-08	35356	chr3	56815721	3004_67_PDCD1LG2_PD_L2	2	1	TRUE
13	rs17814462	T	G	T	G	0.1488	-0.0468151	0.0307293	FALSE	FALSE	FALSE	GCST90277238	0.0509761	0.179212	7174	9	4598881	NA	NA	NA	NA	NA	NA	NA	0.022151	1.848e-11	35380	chr9	4598881	3004_67_PDCD1LG2_PD_L2	2	1	TRUE
14	rs2146714	TTTC	TTTA	G	T	0.0499	-0.0150962	0.388282	TRUE	FALSE	FALSE	GCST90277238	0.0170811	0.188403	7174	9	5708176	TRUE	rs2146714	rs10975253	C	A	T	C	0.008491	4.18e-09	35367	chr9	5704225	3004_67_PDCD1LG2_PD_L2	2	1	FALSE
15	rs58970962	A	G	A	G	0.3579	0.0309528	0.216649	FALSE	FALSE	FALSE	GCST90277238	0.0205113	0.0656416	7174	9	5509678	NA	NA	NA	NA	NA	NA	NA	0.007938	1e-200	35367	chr9	5509678	3004_67_PDCD1LG2_PD_L2	2	1	TRUE
16	rs62560217	T	C	T	C	0.155	0.0119199	0.0137763	FALSE	FALSE	FALSE	GCST90277238	0.0738063	0.435849	7174	9	5477636	NA	NA	NA	NA	NA	NA	NA	0.017835	3.603e-18	35366	chr9	5477636	3004_67_PDCD1LG2_PD_L2	2	1	TRUE
17	rs77533513	G	A	G	A	-0.1614	0.014932	0.0637921	FALSE	FALSE	FALSE	GCST90277238	0.0347185	0.333566	7174	9	5098105	NA	NA	NA	NA	NA	NA	NA	0.02286	1.66e-12	35370	chr9	5098105	3004_67_PDCD1LG2_PD_L2	2	1	TRUE
18	rs8176743	T	C	T	C	0.146	-0.00276578	0.136473	FALSE	FALSE	FALSE	GCST90277238	0.0244246	0.454921	7174	9	133256028	NA	NA	NA	NA	NA	NA	NA	0.01656	1.184e-18	35370	chr9	133256028	3004_67_PDCD1LG2_PD_L2	2	1	TRUE
19	rs9438	C	G	C	G	-0.1411	0.0122871	0.428587	FALSE	TRUE	TRUE	GCST90277238	0.0168017	0.232298	7174	3	154301098	NA	NA	NA	NA	NA	NA	NA	0.008213	3.679e-66	35346	chr3	154301098	3004_67_PDCD1LG2_PD_L2	2	1	FALSE
20	rs12484700	G	A	G	A	-0.0667	-0.0771287	0.191044	FALSE	FALSE	FALSE	GCST90277238	0.0213701	0.000153579	7174	22	43931393	NA	NA	NA	NA	NA	NA	NA	0.010885	8.915e-10	35372	chr22	43931393	6605_17_IGFALS_IGFALS	2	1	TRUE
21	rs184995649	TTGGC	GTGGC	A	C	-0.2888	0.0402008	0.0201058	TRUE	FALSE	FALSE	GCST90277238	0.0605086	0.253223	7174	16	3275320	NA	NA	NA	NA	NA	NA	NA	0.029446	1.044e-22	35340	chr16	3275320	6605_17_IGFALS_IGFALS	2	1	FALSE
22	rs1863622	C	T	C	T	0.0789	0.012586	0.265273	FALSE	FALSE	FALSE	GCST90277238	0.018794	0.25153	7174	3	186678827	NA	NA	NA	NA	NA	NA	NA	0.009542	1.357e-16	35368	chr3	186678827	6605_17_IGFALS_IGFALS	2	1	TRUE
23	rs191609731	A	G	A	G	-0.2813	-0.0256193	0.00435235	FALSE	FALSE	FALSE	GCST90277238	0.140522	0.427668	7174	16	1157141	NA	NA	NA	NA	NA	NA	NA	0.031617	5.736e-19	35310	chr16	1157141	6605_17_IGFALS_IGFALS	2	1	TRUE
24	rs2854746	C	G	C	G	0.1601	-0.0156684	0.3648	FALSE	TRUE	TRUE	GCST90277238	0.0175681	0.186232	7174	7	45921046	NA	NA	NA	NA	NA	NA	NA	0.008692	9.143e-76	35347	chr7	45921046	6605_17_IGFALS_IGFALS	2	1	FALSE
25	rs35391516	A	G	A	G	0.2104	-0.0041822	0.0531018	FALSE	FALSE	FALSE	GCST90277238	0.0377218	0.45586	7174	16	1793815	NA	NA	NA	NA	NA	NA	NA	0.014761	4.26e-46	35321	chr16	1793815	6605_17_IGFALS_IGFALS	2	1	TRUE
26	rs35801822	G	A	G	A	-0.0901	0.00882628	0.113994	FALSE	FALSE	FALSE	GCST90277238	0.02729	0.373187	7174	16	2679949	NA	NA	NA	NA	NA	NA	NA	0.014374	3.649e-10	35318	chr16	2679949	6605_17_IGFALS_IGFALS	2	1	TRUE
27	rs4699726	C	T	C	T	0.0517	-0.0140085	0.574107	FALSE	FALSE	FALSE	GCST90277238	0.0169277	0.203963	7174	4	99178356	NA	NA	NA	NA	NA	NA	NA	0.008219	3.172e-10	35344	chr4	99178356	6605_17_IGFALS_IGFALS	2	1	TRUE
28	rs4786194	T	C	T	C	-0.3137	-0.0413811	0.0176021	FALSE	FALSE	FALSE	GCST90277238	0.0652373	0.262937	7174	16	1503268	NA	NA	NA	NA	NA	NA	NA	0.027127	6.253e-31	35316	chr16	1503268	6605_17_IGFALS_IGFALS	2	1	TRUE
29	rs569213664	T	C	T	C	0.2342	0.028217	0.0306138	FALSE	FALSE	FALSE	GCST90277238	0.0503472	0.287587	7174	3	172556442	TRUE	rs569213664	rs574044675	T	C	C	A	0.036037	8.097e-11	35354	chr3	172558731	6605_17_IGFALS_IGFALS	2	1	TRUE
30	rs61754523	T	C	T	C	-0.2312	0.00478152	0.0122104	FALSE	FALSE	FALSE	GCST90277238	0.0805388	0.476329	7174	16	3729593	NA	NA	NA	NA	NA	NA	NA	0.028222	2.564e-16	35353	chr16	3729593	6605_17_IGFALS_IGFALS	2	1	TRUE
31	rs77971956	G	A	G	A	-0.8547	-0.00340332	0.0194296	FALSE	FALSE	FALSE	GCST90277238	0.0626343	0.478334	7174	16	1177272	NA	NA	NA	NA	NA	NA	NA	0.051055	6.61e-63	35312	chr16	1177272	6605_17_IGFALS_IGFALS	2	1	TRUE
	SNP	effect_allele.exposure	other_allele.exposure	effect_allele.outcome	other_allele.outcome	beta.exposure	beta.outcome	eaf.outcome	remove	palindromic	ambiguous	id.outcome	se.outcome	pval.outcome	samplesize.outcome	chr.outcome	pos.outcome	proxy.outcome	target_snp.outcome	proxy_snp.outcome	target_a1.outcome	target_a2.outcome	proxy_a1.outcome	proxy_a2.outcome	se.exposure	pval.exposure	samplesize.exposure	chr.exposure	pos.exposure	exposure	action	SNP_index	mr_keep
1	rs10819325	TTTTTG	TTTTTC	C	G	-0.0681	0.0323642	0.938897	TRUE	FALSE	FALSE	GCST90277242	0.0350346	0.177801	7047	9	127986347	TRUE	rs10819325	rs7859847	G	C	A	G	0.011745	6.694e-09	35351	chr9	127984543	3234_23_CCDC80_URB	2	1	FALSE
2	rs143501783	C	T	C	T	0.2418	-0.272069	0.0025504	FALSE	FALSE	FALSE	GCST90277242	0.169091	0.0538071	7047	17	7897001	NA	NA	NA	NA	NA	NA	NA	0.037171	7.77e-11	35373	chr17	7897001	3234_23_CCDC80_URB	2	1	TRUE
3	rs2142306	C	T	C	T	0.0939	-0.022295	0.369621	FALSE	FALSE	FALSE	GCST90277242	0.0177741	0.104857	7047	8	133458388	NA	NA	NA	NA	NA	NA	NA	0.008224	3.392e-30	35374	chr8	133458388	3234_23_CCDC80_URB	2	1	TRUE
4	rs2978006	G	A	G	A	0.0694	-0.0165813	0.654981	FALSE	FALSE	FALSE	GCST90277242	0.0178188	0.176043	7047	8	133521519	NA	NA	NA	NA	NA	NA	NA	0.008464	2.411e-16	35373	chr8	133521519	3234_23_CCDC80_URB	2	1	TRUE
5	rs55714927	T	C	T	C	0.0783	0.0132629	0.298609	FALSE	FALSE	FALSE	GCST90277242	0.0190005	0.24258	7047	17	7169772	TRUE	rs55714927	rs62061425	T	C	G	A	0.010063	7.199e-15	35370	chr17	7176997	3234_23_CCDC80_URB	2	1	TRUE
6	rs6797920	G	A	G	A	0.0573	-0.0206328	0.606261	FALSE	FALSE	FALSE	GCST90277242	0.0173859	0.117662	7047	3	112791263	NA	NA	NA	NA	NA	NA	NA	0.008514	1.698e-11	35362	chr3	112791263	3234_23_CCDC80_URB	2	1	TRUE
7	rs73669307	C	T	C	T	0.1006	-0.0228545	0.0659014	FALSE	FALSE	FALSE	GCST90277242	0.0343292	0.252787	7047	9	127956218	NA	NA	NA	NA	NA	NA	NA	0.012719	2.592e-15	35355	chr9	127956218	3234_23_CCDC80_URB	2	1	TRUE
8	rs767298	TAACTAAT	GAACTAAT	A	C	0.0547	-0.0022797	0.641858	TRUE	FALSE	FALSE	GCST90277242	0.0177174	0.448809	7047	7	7234953	NA	NA	NA	NA	NA	NA	NA	0.008255	3.44e-11	35362	chr7	7234953	3234_23_CCDC80_URB	2	1	FALSE
9	rs9845240	A	G	A	G	0.0937	0.00164384	0.32768	FALSE	FALSE	FALSE	GCST90277242	0.0180492	0.463716	7047	3	112655985	NA	NA	NA	NA	NA	NA	NA	0.008481	2.238e-28	35354	chr3	112655985	3234_23_CCDC80_URB	2	1	TRUE
10	rs10935899	G	C	G	C	-0.0538	-0.00374219	0.192925	FALSE	TRUE	TRUE	GCST90277242	0.0215232	0.430985	7047	3	152767339	NA	NA	NA	NA	NA	NA	NA	0.009505	1.513e-08	35350	chr3	152767339	3004_67_PDCD1LG2_PD_L2	2	1	FALSE
11	rs12496730	C	G	C	G	-0.1258	0.00314806	0.434029	FALSE	TRUE	TRUE	GCST90277242	0.0169917	0.426508	7047	3	98684125	TRUE	rs12496730	rs11927405	C	G	T	C	0.008131	5.34e-54	35330	chr3	98688089	3004_67_PDCD1LG2_PD_L2	2	1	FALSE
12	rs1354034	C	T	C	T	0.047	-0.00808635	0.712723	FALSE	FALSE	FALSE	GCST90277242	0.0184472	0.330566	7047	3	56815721	NA	NA	NA	NA	NA	NA	NA	0.008325	1.647e-08	35356	chr3	56815721	3004_67_PDCD1LG2_PD_L2	2	1	TRUE
13	rs17814462	T	G	T	G	0.1488	-0.067399	0.0307293	FALSE	FALSE	FALSE	GCST90277242	0.0515528	0.0955422	7047	9	4598881	NA	NA	NA	NA	NA	NA	NA	0.022151	1.848e-11	35380	chr9	4598881	3004_67_PDCD1LG2_PD_L2	2	1	TRUE
14	rs2146714	TTTC	TTTA	G	T	0.0499	-0.0236627	0.388282	TRUE	FALSE	FALSE	GCST90277242	0.017217	0.0846619	7047	9	5708176	TRUE	rs2146714	rs10975253	C	A	T	C	0.008491	4.18e-09	35367	chr9	5704225	3004_67_PDCD1LG2_PD_L2	2	1	FALSE
15	rs58970962	A	G	A	G	0.3579	0.0277522	0.216649	FALSE	FALSE	FALSE	GCST90277242	0.0207382	0.0904129	7047	9	5509678	NA	NA	NA	NA	NA	NA	NA	0.007938	1e-200	35367	chr9	5509678	3004_67_PDCD1LG2_PD_L2	2	1	TRUE
16	rs62560217	T	C	T	C	0.155	0.0460805	0.0137763	FALSE	FALSE	FALSE	GCST90277242	0.0746039	0.268397	7047	9	5477636	NA	NA	NA	NA	NA	NA	NA	0.017835	3.603e-18	35366	chr9	5477636	3004_67_PDCD1LG2_PD_L2	2	1	TRUE
17	rs77533513	G	A	G	A	-0.1614	0.0010148	0.0637921	FALSE	FALSE	FALSE	GCST90277242	0.0349762	0.488427	7047	9	5098105	NA	NA	NA	NA	NA	NA	NA	0.02286	1.66e-12	35370	chr9	5098105	3004_67_PDCD1LG2_PD_L2	2	1	TRUE
18	rs8176743	T	C	T	C	0.146	-0.0597252	0.136473	FALSE	FALSE	FALSE	GCST90277242	0.0245958	0.00758556	7047	9	133256028	NA	NA	NA	NA	NA	NA	NA	0.01656	1.184e-18	35370	chr9	133256028	3004_67_PDCD1LG2_PD_L2	2	1	TRUE
19	rs9438	C	G	C	G	-0.1411	-0.0209233	0.428587	FALSE	TRUE	TRUE	GCST90277242	0.0169648	0.108725	7047	3	154301098	NA	NA	NA	NA	NA	NA	NA	0.008213	3.679e-66	35346	chr3	154301098	3004_67_PDCD1LG2_PD_L2	2	1	FALSE
20	rs12484700	G	A	G	A	-0.0667	-0.0277111	0.191044	FALSE	FALSE	FALSE	GCST90277242	0.0215923	0.0996797	7047	22	43931393	NA	NA	NA	NA	NA	NA	NA	0.010885	8.915e-10	35372	chr22	43931393	6605_17_IGFALS_IGFALS	2	1	TRUE
21	rs184995649	TTGGC	GTGGC	A	C	-0.2888	0.0171421	0.0201058	TRUE	FALSE	FALSE	GCST90277242	0.0608075	0.389007	7047	16	3275320	NA	NA	NA	NA	NA	NA	NA	0.029446	1.044e-22	35340	chr16	3275320	6605_17_IGFALS_IGFALS	2	1	FALSE
22	rs1863622	C	T	C	T	0.0789	0.015456	0.265273	FALSE	FALSE	FALSE	GCST90277242	0.0189609	0.207493	7047	3	186678827	NA	NA	NA	NA	NA	NA	NA	0.009542	1.357e-16	35368	chr3	186678827	6605_17_IGFALS_IGFALS	2	1	TRUE
23	rs191609731	A	G	A	G	-0.2813	-0.0737113	0.00435235	FALSE	FALSE	FALSE	GCST90277242	0.140938	0.300485	7047	16	1157141	NA	NA	NA	NA	NA	NA	NA	0.031617	5.736e-19	35310	chr16	1157141	6605_17_IGFALS_IGFALS	2	1	TRUE
24	rs2854746	C	G	C	G	0.1601	0.00235588	0.3648	FALSE	TRUE	TRUE	GCST90277242	0.0177484	0.4472	7047	7	45921046	NA	NA	NA	NA	NA	NA	NA	0.008692	9.143e-76	35347	chr7	45921046	6605_17_IGFALS_IGFALS	2	1	FALSE
25	rs35391516	A	G	A	G	0.2104	-0.00926191	0.0531018	FALSE	FALSE	FALSE	GCST90277242	0.0381631	0.404122	7047	16	1793815	NA	NA	NA	NA	NA	NA	NA	0.014761	4.26e-46	35321	chr16	1793815	6605_17_IGFALS_IGFALS	2	1	TRUE
26	rs35801822	G	A	G	A	-0.0901	0.016029	0.113994	FALSE	FALSE	FALSE	GCST90277242	0.0275916	0.280641	7047	16	2679949	NA	NA	NA	NA	NA	NA	NA	0.014374	3.649e-10	35318	chr16	2679949	6605_17_IGFALS_IGFALS	2	1	TRUE
27	rs4699726	C	T	C	T	0.0517	0.0130641	0.574107	FALSE	FALSE	FALSE	GCST90277242	0.0171064	0.222524	7047	4	99178356	NA	NA	NA	NA	NA	NA	NA	0.008219	3.172e-10	35344	chr4	99178356	6605_17_IGFALS_IGFALS	2	1	TRUE
28	rs4786194	T	C	T	C	-0.3137	-0.00815719	0.0176021	FALSE	FALSE	FALSE	GCST90277242	0.0660704	0.450871	7047	16	1503268	NA	NA	NA	NA	NA	NA	NA	0.027127	6.253e-31	35316	chr16	1503268	6605_17_IGFALS_IGFALS	2	1	TRUE
29	rs569213664	T	C	T	C	0.2342	0.0517444	0.0306138	FALSE	FALSE	FALSE	GCST90277242	0.0507417	0.153921	7047	3	172556442	TRUE	rs569213664	rs574044675	T	C	C	A	0.036037	8.097e-11	35354	chr3	172558731	6605_17_IGFALS_IGFALS	2	1	TRUE
30	rs61754523	T	C	T	C	-0.2312	0.0266951	0.0122104	FALSE	FALSE	FALSE	GCST90277242	0.0823173	0.372857	7047	16	3729593	NA	NA	NA	NA	NA	NA	NA	0.028222	2.564e-16	35353	chr16	3729593	6605_17_IGFALS_IGFALS	2	1	TRUE
31	rs77971956	G	A	G	A	-0.8547	0.106248	0.0194296	FALSE	FALSE	FALSE	GCST90277242	0.0640111	0.0484736	7047	16	1177272	NA	NA	NA	NA	NA	NA	NA	0.051055	6.61e-63	35312	chr16	1177272	6605_17_IGFALS_IGFALS	2	1	TRUE
	SNP	effect_allele.exposure	other_allele.exposure	effect_allele.outcome	other_allele.outcome	beta.exposure	beta.outcome	eaf.outcome	remove	palindromic	ambiguous	id.outcome	se.outcome	pval.outcome	samplesize.outcome	chr.outcome	pos.outcome	proxy.outcome	target_snp.outcome	proxy_snp.outcome	target_a1.outcome	target_a2.outcome	proxy_a1.outcome	proxy_a2.outcome	se.exposure	pval.exposure	samplesize.exposure	chr.exposure	pos.exposure	exposure	action	SNP_index	mr_keep
1	rs10819325	TTTTTG	TTTTTC	C	G	-0.0681	0.0153855	0.938897	TRUE	FALSE	FALSE	GCST90277244	0.03476	0.32902	7157	9	127986347	TRUE	rs10819325	rs7859847	G	C	A	G	0.011745	6.694e-09	35351	chr9	127984543	3234_23_CCDC80_URB	2	1	FALSE
2	rs143501783	C	T	C	T	0.2418	-0.168226	0.0025504	FALSE	FALSE	FALSE	GCST90277244	0.168859	0.159564	7157	17	7897001	NA	NA	NA	NA	NA	NA	NA	0.037171	7.77e-11	35373	chr17	7897001	3234_23_CCDC80_URB	2	1	TRUE
3	rs2142306	C	T	C	T	0.0939	-0.00759707	0.369621	FALSE	FALSE	FALSE	GCST90277244	0.0176058	0.333049	7157	8	133458388	NA	NA	NA	NA	NA	NA	NA	0.008224	3.392e-30	35374	chr8	133458388	3234_23_CCDC80_URB	2	1	TRUE
4	rs2978006	G	A	G	A	0.0694	-0.0354075	0.654981	FALSE	FALSE	FALSE	GCST90277244	0.0176526	0.0224391	7157	8	133521519	NA	NA	NA	NA	NA	NA	NA	0.008464	2.411e-16	35373	chr8	133521519	3234_23_CCDC80_URB	2	1	TRUE
5	rs55714927	T	C	T	C	0.0783	0.00135688	0.298609	FALSE	FALSE	FALSE	GCST90277244	0.0188405	0.471293	7157	17	7169772	TRUE	rs55714927	rs62061425	T	C	G	A	0.010063	7.199e-15	35370	chr17	7176997	3234_23_CCDC80_URB	2	1	TRUE
6	rs6797920	G	A	G	A	0.0573	-0.0251618	0.606261	FALSE	FALSE	FALSE	GCST90277244	0.0172618	0.0724674	7157	3	112791263	NA	NA	NA	NA	NA	NA	NA	0.008514	1.698e-11	35362	chr3	112791263	3234_23_CCDC80_URB	2	1	TRUE
7	rs73669307	C	T	C	T	0.1006	-0.00911109	0.0659014	FALSE	FALSE	FALSE	GCST90277244	0.0340126	0.394398	7157	9	127956218	NA	NA	NA	NA	NA	NA	NA	0.012719	2.592e-15	35355	chr9	127956218	3234_23_CCDC80_URB	2	1	TRUE
8	rs767298	TAACTAAT	GAACTAAT	A	C	0.0547	-0.00672648	0.641858	TRUE	FALSE	FALSE	GCST90277244	0.0175998	0.35116	7157	7	7234953	NA	NA	NA	NA	NA	NA	NA	0.008255	3.44e-11	35362	chr7	7234953	3234_23_CCDC80_URB	2	1	FALSE
9	rs9845240	A	G	A	G	0.0937	0.00279872	0.32768	FALSE	FALSE	FALSE	GCST90277244	0.0179022	0.437885	7157	3	112655985	NA	NA	NA	NA	NA	NA	NA	0.008481	2.238e-28	35354	chr3	112655985	3234_23_CCDC80_URB	2	1	TRUE
10	rs10935899	G	C	G	C	-0.0538	0.00523245	0.192925	FALSE	TRUE	TRUE	GCST90277244	0.0213262	0.403092	7157	3	152767339	NA	NA	NA	NA	NA	NA	NA	0.009505	1.513e-08	35350	chr3	152767339	3004_67_PDCD1LG2_PD_L2	2	1	FALSE
11	rs12496730	C	G	C	G	-0.1258	-0.0168728	0.434029	FALSE	TRUE	TRUE	GCST90277244	0.0168352	0.158115	7157	3	98684125	TRUE	rs12496730	rs11927405	C	G	T	C	0.008131	5.34e-54	35330	chr3	98688089	3004_67_PDCD1LG2_PD_L2	2	1	FALSE
12	rs1354034	C	T	C	T	0.047	-0.011175	0.712723	FALSE	FALSE	FALSE	GCST90277244	0.0182869	0.270569	7157	3	56815721	NA	NA	NA	NA	NA	NA	NA	0.008325	1.647e-08	35356	chr3	56815721	3004_67_PDCD1LG2_PD_L2	2	1	TRUE
13	rs17814462	T	G	T	G	0.1488	-0.0556723	0.0307293	FALSE	FALSE	FALSE	GCST90277244	0.0511016	0.137979	7157	9	4598881	NA	NA	NA	NA	NA	NA	NA	0.022151	1.848e-11	35380	chr9	4598881	3004_67_PDCD1LG2_PD_L2	2	1	TRUE
14	rs2146714	TTTC	TTTA	G	T	0.0499	-0.0019105	0.388282	TRUE	FALSE	FALSE	GCST90277244	0.017089	0.455492	7157	9	5708176	TRUE	rs2146714	rs10975253	C	A	T	C	0.008491	4.18e-09	35367	chr9	5704225	3004_67_PDCD1LG2_PD_L2	2	1	FALSE
15	rs58970962	A	G	A	G	0.3579	0.0466146	0.216649	FALSE	FALSE	FALSE	GCST90277244	0.0205069	0.0115095	7157	9	5509678	NA	NA	NA	NA	NA	NA	NA	0.007938	1e-200	35367	chr9	5509678	3004_67_PDCD1LG2_PD_L2	2	1	TRUE
16	rs62560217	T	C	T	C	0.155	0.071993	0.0137763	FALSE	FALSE	FALSE	GCST90277244	0.073787	0.16461	7157	9	5477636	NA	NA	NA	NA	NA	NA	NA	0.017835	3.603e-18	35366	chr9	5477636	3004_67_PDCD1LG2_PD_L2	2	1	TRUE
17	rs77533513	G	A	G	A	-0.1614	-0.0431039	0.0637921	FALSE	FALSE	FALSE	GCST90277244	0.034724	0.107242	7157	9	5098105	NA	NA	NA	NA	NA	NA	NA	0.02286	1.66e-12	35370	chr9	5098105	3004_67_PDCD1LG2_PD_L2	2	1	TRUE
18	rs8176743	T	C	T	C	0.146	-0.0277578	0.136473	FALSE	FALSE	FALSE	GCST90277244	0.02444	0.12803	7157	9	133256028	NA	NA	NA	NA	NA	NA	NA	0.01656	1.184e-18	35370	chr9	133256028	3004_67_PDCD1LG2_PD_L2	2	1	TRUE
19	rs9438	C	G	C	G	-0.1411	-0.0233171	0.428587	FALSE	TRUE	TRUE	GCST90277244	0.0168267	0.0829162	7157	3	154301098	NA	NA	NA	NA	NA	NA	NA	0.008213	3.679e-66	35346	chr3	154301098	3004_67_PDCD1LG2_PD_L2	2	1	FALSE
20	rs12484700	G	A	G	A	-0.0667	-0.019172	0.191044	FALSE	FALSE	FALSE	GCST90277244	0.0213942	0.185091	7157	22	43931393	NA	NA	NA	NA	NA	NA	NA	0.010885	8.915e-10	35372	chr22	43931393	6605_17_IGFALS_IGFALS	2	1	TRUE
21	rs184995649	TTGGC	GTGGC	A	C	-0.2888	0.0183408	0.0201058	TRUE	FALSE	FALSE	GCST90277244	0.0604625	0.380815	7157	16	3275320	NA	NA	NA	NA	NA	NA	NA	0.029446	1.044e-22	35340	chr16	3275320	6605_17_IGFALS_IGFALS	2	1	FALSE
22	rs1863622	C	T	C	T	0.0789	-0.00233167	0.265273	FALSE	FALSE	FALSE	GCST90277244	0.0188085	0.45067	7157	3	186678827	NA	NA	NA	NA	NA	NA	NA	0.009542	1.357e-16	35368	chr3	186678827	6605_17_IGFALS_IGFALS	2	1	TRUE
23	rs191609731	A	G	A	G	-0.2813	0.046282	0.00435235	FALSE	FALSE	FALSE	GCST90277244	0.140389	0.370825	7157	16	1157141	NA	NA	NA	NA	NA	NA	NA	0.031617	5.736e-19	35310	chr16	1157141	6605_17_IGFALS_IGFALS	2	1	TRUE
24	rs2854746	C	G	C	G	0.1601	0.0169607	0.3648	FALSE	TRUE	TRUE	GCST90277244	0.0175956	0.167544	7157	7	45921046	NA	NA	NA	NA	NA	NA	NA	0.008692	9.143e-76	35347	chr7	45921046	6605_17_IGFALS_IGFALS	2	1	FALSE
25	rs35391516	A	G	A	G	0.2104	-0.00944439	0.0531018	FALSE	FALSE	FALSE	GCST90277244	0.0377514	0.401227	7157	16	1793815	NA	NA	NA	NA	NA	NA	NA	0.014761	4.26e-46	35321	chr16	1793815	6605_17_IGFALS_IGFALS	2	1	TRUE
26	rs35801822	G	A	G	A	-0.0901	0.00583988	0.113994	FALSE	FALSE	FALSE	GCST90277244	0.0272914	0.41528	7157	16	2679949	NA	NA	NA	NA	NA	NA	NA	0.014374	3.649e-10	35318	chr16	2679949	6605_17_IGFALS_IGFALS	2	1	TRUE
27	rs4699726	C	T	C	T	0.0517	0.00522718	0.574107	FALSE	FALSE	FALSE	GCST90277244	0.0169427	0.378843	7157	4	99178356	NA	NA	NA	NA	NA	NA	NA	0.008219	3.172e-10	35344	chr4	99178356	6605_17_IGFALS_IGFALS	2	1	TRUE
28	rs4786194	T	C	T	C	-0.3137	-0.0912808	0.0176021	FALSE	FALSE	FALSE	GCST90277244	0.0653337	0.0811846	7157	16	1503268	NA	NA	NA	NA	NA	NA	NA	0.027127	6.253e-31	35316	chr16	1503268	6605_17_IGFALS_IGFALS	2	1	TRUE
29	rs569213664	T	C	T	C	0.2342	0.0152587	0.0306138	FALSE	FALSE	FALSE	GCST90277244	0.0503317	0.380883	7157	3	172556442	TRUE	rs569213664	rs574044675	T	C	C	A	0.036037	8.097e-11	35354	chr3	172558731	6605_17_IGFALS_IGFALS	2	1	TRUE
30	rs61754523	T	C	T	C	-0.2312	0.0487018	0.0122104	FALSE	FALSE	FALSE	GCST90277244	0.0806986	0.273087	7157	16	3729593	NA	NA	NA	NA	NA	NA	NA	0.028222	2.564e-16	35353	chr16	3729593	6605_17_IGFALS_IGFALS	2	1	TRUE
31	rs77971956	G	A	G	A	-0.8547	0.0765241	0.0194296	FALSE	FALSE	FALSE	GCST90277244	0.06267	0.111031	7157	16	1177272	NA	NA	NA	NA	NA	NA	NA	0.051055	6.61e-63	35312	chr16	1177272	6605_17_IGFALS_IGFALS	2	1	TRUE
	SNP	effect_allele.exposure	other_allele.exposure	effect_allele.outcome	other_allele.outcome	beta.exposure	beta.outcome	eaf.outcome	remove	palindromic	ambiguous	id.outcome	se.outcome	pval.outcome	samplesize.outcome	chr.outcome	pos.outcome	proxy.outcome	target_snp.outcome	proxy_snp.outcome	target_a1.outcome	target_a2.outcome	proxy_a1.outcome	proxy_a2.outcome	se.exposure	pval.exposure	samplesize.exposure	chr.exposure	pos.exposure	exposure	action	SNP_index	mr_keep
1	rs10819325	TTTTTG	TTTTTC	C	G	-0.0681	0.034795	0.938897	TRUE	FALSE	FALSE	GCST90277255	0.0345974	0.157277	7174	9	127986347	TRUE	rs10819325	rs7859847	G	C	A	G	0.011745	6.694e-09	35351	chr9	127984543	3234_23_CCDC80_URB	2	1	FALSE
2	rs143501783	C	T	C	T	0.2418	-0.206518	0.0025504	FALSE	FALSE	FALSE	GCST90277255	0.168513	0.110188	7174	17	7897001	NA	NA	NA	NA	NA	NA	NA	0.037171	7.77e-11	35373	chr17	7897001	3234_23_CCDC80_URB	2	1	TRUE
3	rs2142306	C	T	C	T	0.0939	-0.0218214	0.369621	FALSE	FALSE	FALSE	GCST90277255	0.0175507	0.106872	7174	8	133458388	NA	NA	NA	NA	NA	NA	NA	0.008224	3.392e-30	35374	chr8	133458388	3234_23_CCDC80_URB	2	1	TRUE
4	rs2978006	G	A	G	A	0.0694	0.00384331	0.654981	FALSE	FALSE	FALSE	GCST90277255	0.0176206	0.41367	7174	8	133521519	NA	NA	NA	NA	NA	NA	NA	0.008464	2.411e-16	35373	chr8	133521519	3234_23_CCDC80_URB	2	1	TRUE
5	rs55714927	T	C	T	C	0.0783	-0.00343983	0.298609	FALSE	FALSE	FALSE	GCST90277255	0.0187903	0.427374	7174	17	7169772	TRUE	rs55714927	rs62061425	T	C	G	A	0.010063	7.199e-15	35370	chr17	7176997	3234_23_CCDC80_URB	2	1	TRUE
6	rs6797920	G	A	G	A	0.0573	0.00356189	0.606261	FALSE	FALSE	FALSE	GCST90277255	0.0172008	0.417975	7174	3	112791263	NA	NA	NA	NA	NA	NA	NA	0.008514	1.698e-11	35362	chr3	112791263	3234_23_CCDC80_URB	2	1	TRUE
7	rs73669307	C	T	C	T	0.1006	-0.0483049	0.0659014	FALSE	FALSE	FALSE	GCST90277255	0.0338977	0.0770757	7174	9	127956218	NA	NA	NA	NA	NA	NA	NA	0.012719	2.592e-15	35355	chr9	127956218	3234_23_CCDC80_URB	2	1	TRUE
8	rs767298	TAACTAAT	GAACTAAT	A	C	0.0547	-0.000385445	0.641858	TRUE	FALSE	FALSE	GCST90277255	0.0175421	0.491235	7174	7	7234953	NA	NA	NA	NA	NA	NA	NA	0.008255	3.44e-11	35362	chr7	7234953	3234_23_CCDC80_URB	2	1	FALSE
9	rs9845240	A	G	A	G	0.0937	0.0256014	0.32768	FALSE	FALSE	FALSE	GCST90277255	0.0178423	0.0756619	7174	3	112655985	NA	NA	NA	NA	NA	NA	NA	0.008481	2.238e-28	35354	chr3	112655985	3234_23_CCDC80_URB	2	1	TRUE
10	rs10935899	G	C	G	C	-0.0538	0.0192746	0.192925	FALSE	TRUE	TRUE	GCST90277255	0.0212512	0.182206	7174	3	152767339	NA	NA	NA	NA	NA	NA	NA	0.009505	1.513e-08	35350	chr3	152767339	3004_67_PDCD1LG2_PD_L2	2	1	FALSE
11	rs12496730	C	G	C	G	-0.1258	0.0132511	0.434029	FALSE	TRUE	TRUE	GCST90277255	0.0167743	0.214774	7174	3	98684125	TRUE	rs12496730	rs11927405	C	G	T	C	0.008131	5.34e-54	35330	chr3	98688089	3004_67_PDCD1LG2_PD_L2	2	1	FALSE
12	rs1354034	C	T	C	T	0.047	0.0166933	0.712723	FALSE	FALSE	FALSE	GCST90277255	0.0182139	0.179699	7174	3	56815721	NA	NA	NA	NA	NA	NA	NA	0.008325	1.647e-08	35356	chr3	56815721	3004_67_PDCD1LG2_PD_L2	2	1	TRUE
13	rs17814462	T	G	T	G	0.1488	-0.104097	0.0307293	FALSE	FALSE	FALSE	GCST90277255	0.0509155	0.0204518	7174	9	4598881	NA	NA	NA	NA	NA	NA	NA	0.022151	1.848e-11	35380	chr9	4598881	3004_67_PDCD1LG2_PD_L2	2	1	TRUE
14	rs2146714	TTTC	TTTA	G	T	0.0499	0.0032782	0.388282	TRUE	FALSE	FALSE	GCST90277255	0.0170409	0.423725	7174	9	5708176	TRUE	rs2146714	rs10975253	C	A	T	C	0.008491	4.18e-09	35367	chr9	5704225	3004_67_PDCD1LG2_PD_L2	2	1	FALSE
15	rs58970962	A	G	A	G	0.3579	0.0449352	0.216649	FALSE	FALSE	FALSE	GCST90277255	0.0204599	0.0140368	7174	9	5509678	NA	NA	NA	NA	NA	NA	NA	0.007938	1e-200	35367	chr9	5509678	3004_67_PDCD1LG2_PD_L2	2	1	TRUE
16	rs62560217	T	C	T	C	0.155	-0.113725	0.0137763	FALSE	FALSE	FALSE	GCST90277255	0.0736562	0.0612945	7174	9	5477636	NA	NA	NA	NA	NA	NA	NA	0.017835	3.603e-18	35366	chr9	5477636	3004_67_PDCD1LG2_PD_L2	2	1	TRUE
17	rs77533513	G	A	G	A	-0.1614	0.0281822	0.0637921	FALSE	FALSE	FALSE	GCST90277255	0.0346531	0.208033	7174	9	5098105	NA	NA	NA	NA	NA	NA	NA	0.02286	1.66e-12	35370	chr9	5098105	3004_67_PDCD1LG2_PD_L2	2	1	TRUE
18	rs8176743	T	C	T	C	0.146	-0.0266595	0.136473	FALSE	FALSE	FALSE	GCST90277255	0.02438	0.137087	7174	9	133256028	NA	NA	NA	NA	NA	NA	NA	0.01656	1.184e-18	35370	chr9	133256028	3004_67_PDCD1LG2_PD_L2	2	1	TRUE
19	rs9438	C	G	C	G	-0.1411	0.0101927	0.428587	FALSE	TRUE	TRUE	GCST90277255	0.0167749	0.271721	7174	3	154301098	NA	NA	NA	NA	NA	NA	NA	0.008213	3.679e-66	35346	chr3	154301098	3004_67_PDCD1LG2_PD_L2	2	1	FALSE
20	rs12484700	G	A	G	A	-0.0667	0.0317998	0.191044	FALSE	FALSE	FALSE	GCST90277255	0.021324	0.0679456	7174	22	43931393	NA	NA	NA	NA	NA	NA	NA	0.010885	8.915e-10	35372	chr22	43931393	6605_17_IGFALS_IGFALS	2	1	TRUE
21	rs184995649	TTGGC	GTGGC	A	C	-0.2888	0.00242267	0.0201058	TRUE	FALSE	FALSE	GCST90277255	0.0603607	0.483992	7174	16	3275320	NA	NA	NA	NA	NA	NA	NA	0.029446	1.044e-22	35340	chr16	3275320	6605_17_IGFALS_IGFALS	2	1	FALSE
22	rs1863622	C	T	C	T	0.0789	0.028616	0.265273	FALSE	FALSE	FALSE	GCST90277255	0.0187407	0.0633875	7174	3	186678827	NA	NA	NA	NA	NA	NA	NA	0.009542	1.357e-16	35368	chr3	186678827	6605_17_IGFALS_IGFALS	2	1	TRUE
23	rs191609731	A	G	A	G	-0.2813	0.156113	0.00435235	FALSE	FALSE	FALSE	GCST90277255	0.140155	0.13267	7174	16	1157141	NA	NA	NA	NA	NA	NA	NA	0.031617	5.736e-19	35310	chr16	1157141	6605_17_IGFALS_IGFALS	2	1	TRUE
24	rs2854746	C	G	C	G	0.1601	0.0101393	0.3648	FALSE	TRUE	TRUE	GCST90277255	0.0175379	0.281586	7174	7	45921046	NA	NA	NA	NA	NA	NA	NA	0.008692	9.143e-76	35347	chr7	45921046	6605_17_IGFALS_IGFALS	2	1	FALSE
25	rs35391516	A	G	A	G	0.2104	0.00861678	0.0531018	FALSE	FALSE	FALSE	GCST90277255	0.0376629	0.409517	7174	16	1793815	NA	NA	NA	NA	NA	NA	NA	0.014761	4.26e-46	35321	chr16	1793815	6605_17_IGFALS_IGFALS	2	1	TRUE
26	rs35801822	G	A	G	A	-0.0901	0.00429557	0.113994	FALSE	FALSE	FALSE	GCST90277255	0.0272329	0.437333	7174	16	2679949	NA	NA	NA	NA	NA	NA	NA	0.014374	3.649e-10	35318	chr16	2679949	6605_17_IGFALS_IGFALS	2	1	TRUE
27	rs4699726	C	T	C	T	0.0517	0.00851493	0.574107	FALSE	FALSE	FALSE	GCST90277255	0.0168933	0.307116	7174	4	99178356	NA	NA	NA	NA	NA	NA	NA	0.008219	3.172e-10	35344	chr4	99178356	6605_17_IGFALS_IGFALS	2	1	TRUE
28	rs4786194	T	C	T	C	-0.3137	0.0506586	0.0176021	FALSE	FALSE	FALSE	GCST90277255	0.0651077	0.218263	7174	16	1503268	NA	NA	NA	NA	NA	NA	NA	0.027127	6.253e-31	35316	chr16	1503268	6605_17_IGFALS_IGFALS	2	1	TRUE
29	rs569213664	T	C	T	C	0.2342	0.0217927	0.0306138	FALSE	FALSE	FALSE	GCST90277255	0.0502166	0.332154	7174	3	172556442	TRUE	rs569213664	rs574044675	T	C	C	A	0.036037	8.097e-11	35354	chr3	172558731	6605_17_IGFALS_IGFALS	2	1	TRUE
30	rs61754523	T	C	T	C	-0.2312	-0.05255	0.0122104	FALSE	FALSE	FALSE	GCST90277255	0.0803301	0.256499	7174	16	3729593	NA	NA	NA	NA	NA	NA	NA	0.028222	2.564e-16	35353	chr16	3729593	6605_17_IGFALS_IGFALS	2	1	TRUE
31	rs77971956	G	A	G	A	-0.8547	-0.0155629	0.0194296	FALSE	FALSE	FALSE	GCST90277255	0.0624668	0.401627	7174	16	1177272	NA	NA	NA	NA	NA	NA	NA	0.051055	6.61e-63	35312	chr16	1177272	6605_17_IGFALS_IGFALS	2	1	TRUE
	SNP	effect_allele.exposure	other_allele.exposure	effect_allele.outcome	other_allele.outcome	beta.exposure	beta.outcome	eaf.outcome	remove	palindromic	ambiguous	id.outcome	se.outcome	pval.outcome	samplesize.outcome	chr.outcome	pos.outcome	proxy.outcome	target_snp.outcome	proxy_snp.outcome	target_a1.outcome	target_a2.outcome	proxy_a1.outcome	proxy_a2.outcome	se.exposure	pval.exposure	samplesize.exposure	chr.exposure	pos.exposure	exposure	action	SNP_index	mr_keep
1	rs10819325	TTTTTG	TTTTTC	C	G	-0.0681	-0.00128745	0.938897	TRUE	FALSE	FALSE	GCST90277260	0.0379235	0.486459	6215	9	127986347	TRUE	rs10819325	rs7859847	G	C	A	G	0.011745	6.694e-09	35351	chr9	127984543	3234_23_CCDC80_URB	2	1	FALSE
2	rs143501783	C	T	C	T	0.2418	-0.355013	0.0025504	FALSE	FALSE	FALSE	GCST90277260	0.18243	0.025826	6215	17	7897001	NA	NA	NA	NA	NA	NA	NA	0.037171	7.77e-11	35373	chr17	7897001	3234_23_CCDC80_URB	2	1	TRUE
3	rs2142306	C	T	C	T	0.0939	-0.00303043	0.369621	FALSE	FALSE	FALSE	GCST90277260	0.0189381	0.436434	6215	8	133458388	NA	NA	NA	NA	NA	NA	NA	0.008224	3.392e-30	35374	chr8	133458388	3234_23_CCDC80_URB	2	1	TRUE
4	rs2978006	G	A	G	A	0.0694	0.00239368	0.654981	FALSE	FALSE	FALSE	GCST90277260	0.0189741	0.449805	6215	8	133521519	NA	NA	NA	NA	NA	NA	NA	0.008464	2.411e-16	35373	chr8	133521519	3234_23_CCDC80_URB	2	1	TRUE
5	rs55714927	T	C	T	C	0.0783	-0.0346695	0.298609	FALSE	FALSE	FALSE	GCST90277260	0.0202264	0.0432578	6215	17	7169772	TRUE	rs55714927	rs62061425	T	C	G	A	0.010063	7.199e-15	35370	chr17	7176997	3234_23_CCDC80_URB	2	1	TRUE
6	rs6797920	G	A	G	A	0.0573	0.00154585	0.606261	FALSE	FALSE	FALSE	GCST90277260	0.0185711	0.466831	6215	3	112791263	NA	NA	NA	NA	NA	NA	NA	0.008514	1.698e-11	35362	chr3	112791263	3234_23_CCDC80_URB	2	1	TRUE
7	rs73669307	C	T	C	T	0.1006	0.0219149	0.0659014	FALSE	FALSE	FALSE	GCST90277260	0.0362675	0.272836	6215	9	127956218	NA	NA	NA	NA	NA	NA	NA	0.012719	2.592e-15	35355	chr9	127956218	3234_23_CCDC80_URB	2	1	TRUE
8	rs767298	TAACTAAT	GAACTAAT	A	C	0.0547	0.00122937	0.641858	TRUE	FALSE	FALSE	GCST90277260	0.0188925	0.474058	6215	7	7234953	NA	NA	NA	NA	NA	NA	NA	0.008255	3.44e-11	35362	chr7	7234953	3234_23_CCDC80_URB	2	1	FALSE
9	rs9845240	A	G	A	G	0.0937	0.0126181	0.32768	FALSE	FALSE	FALSE	GCST90277260	0.0191886	0.255403	6215	3	112655985	NA	NA	NA	NA	NA	NA	NA	0.008481	2.238e-28	35354	chr3	112655985	3234_23_CCDC80_URB	2	1	TRUE
10	rs10935899	G	C	G	C	-0.0538	-0.0334029	0.192925	FALSE	TRUE	TRUE	GCST90277260	0.0229673	0.0729222	6215	3	152767339	NA	NA	NA	NA	NA	NA	NA	0.009505	1.513e-08	35350	chr3	152767339	3004_67_PDCD1LG2_PD_L2	2	1	FALSE
11	rs12496730	C	G	C	G	-0.1258	-0.0165139	0.434029	FALSE	TRUE	TRUE	GCST90277260	0.0181153	0.18099	6215	3	98684125	TRUE	rs12496730	rs11927405	C	G	T	C	0.008131	5.34e-54	35330	chr3	98688089	3004_67_PDCD1LG2_PD_L2	2	1	FALSE
12	rs1354034	C	T	C	T	0.047	0.0369458	0.712723	FALSE	FALSE	FALSE	GCST90277260	0.0196257	0.0298826	6215	3	56815721	NA	NA	NA	NA	NA	NA	NA	0.008325	1.647e-08	35356	chr3	56815721	3004_67_PDCD1LG2_PD_L2	2	1	TRUE
13	rs17814462	T	G	T	G	0.1488	0.00629834	0.0307293	FALSE	FALSE	FALSE	GCST90277260	0.0545786	0.454064	6215	9	4598881	NA	NA	NA	NA	NA	NA	NA	0.022151	1.848e-11	35380	chr9	4598881	3004_67_PDCD1LG2_PD_L2	2	1	TRUE
14	rs2146714	TTTC	TTTA	G	T	0.0499	-0.0394257	0.388282	TRUE	FALSE	FALSE	GCST90277260	0.0183108	0.0156539	6215	9	5708176	TRUE	rs2146714	rs10975253	C	A	T	C	0.008491	4.18e-09	35367	chr9	5704225	3004_67_PDCD1LG2_PD_L2	2	1	FALSE
15	rs58970962	A	G	A	G	0.3579	0.0166739	0.216649	FALSE	FALSE	FALSE	GCST90277260	0.0219155	0.22338	6215	9	5509678	NA	NA	NA	NA	NA	NA	NA	0.007938	1e-200	35367	chr9	5509678	3004_67_PDCD1LG2_PD_L2	2	1	TRUE
16	rs62560217	T	C	T	C	0.155	-0.0655469	0.0137763	FALSE	FALSE	FALSE	GCST90277260	0.0784621	0.201747	6215	9	5477636	NA	NA	NA	NA	NA	NA	NA	0.017835	3.603e-18	35366	chr9	5477636	3004_67_PDCD1LG2_PD_L2	2	1	TRUE
17	rs77533513	G	A	G	A	-0.1614	0.0215979	0.0637921	FALSE	FALSE	FALSE	GCST90277260	0.0373868	0.281737	6215	9	5098105	NA	NA	NA	NA	NA	NA	NA	0.02286	1.66e-12	35370	chr9	5098105	3004_67_PDCD1LG2_PD_L2	2	1	TRUE
18	rs8176743	T	C	T	C	0.146	0.0449247	0.136473	FALSE	FALSE	FALSE	GCST90277260	0.0261052	0.0426336	6215	9	133256028	NA	NA	NA	NA	NA	NA	NA	0.01656	1.184e-18	35370	chr9	133256028	3004_67_PDCD1LG2_PD_L2	2	1	TRUE
19	rs9438	C	G	C	G	-0.1411	0.0311813	0.428587	FALSE	TRUE	TRUE	GCST90277260	0.0180899	0.0423823	6215	3	154301098	NA	NA	NA	NA	NA	NA	NA	0.008213	3.679e-66	35346	chr3	154301098	3004_67_PDCD1LG2_PD_L2	2	1	FALSE
20	rs12484700	G	A	G	A	-0.0667	-0.0450932	0.191044	FALSE	FALSE	FALSE	GCST90277260	0.0229477	0.0247047	6215	22	43931393	NA	NA	NA	NA	NA	NA	NA	0.010885	8.915e-10	35372	chr22	43931393	6605_17_IGFALS_IGFALS	2	1	TRUE
21	rs184995649	TTGGC	GTGGC	A	C	-0.2888	0.0499116	0.0201058	TRUE	FALSE	FALSE	GCST90277260	0.0652581	0.222185	6215	16	3275320	NA	NA	NA	NA	NA	NA	NA	0.029446	1.044e-22	35340	chr16	3275320	6605_17_IGFALS_IGFALS	2	1	FALSE
22	rs1863622	C	T	C	T	0.0789	-0.000320774	0.265273	FALSE	FALSE	FALSE	GCST90277260	0.0201506	0.49365	6215	3	186678827	NA	NA	NA	NA	NA	NA	NA	0.009542	1.357e-16	35368	chr3	186678827	6605_17_IGFALS_IGFALS	2	1	TRUE
23	rs191609731	A	G	A	G	-0.2813	0.0291688	0.00435235	FALSE	FALSE	FALSE	GCST90277260	0.143971	0.419723	6215	16	1157141	NA	NA	NA	NA	NA	NA	NA	0.031617	5.736e-19	35310	chr16	1157141	6605_17_IGFALS_IGFALS	2	1	TRUE
24	rs2854746	C	G	C	G	0.1601	-0.000314222	0.3648	FALSE	TRUE	TRUE	GCST90277260	0.0188874	0.493363	6215	7	45921046	NA	NA	NA	NA	NA	NA	NA	0.008692	9.143e-76	35347	chr7	45921046	6605_17_IGFALS_IGFALS	2	1	FALSE
25	rs35391516	A	G	A	G	0.2104	-0.00353666	0.0531018	FALSE	FALSE	FALSE	GCST90277260	0.0404846	0.465193	6215	16	1793815	NA	NA	NA	NA	NA	NA	NA	0.014761	4.26e-46	35321	chr16	1793815	6605_17_IGFALS_IGFALS	2	1	TRUE
26	rs35801822	G	A	G	A	-0.0901	0.0601275	0.113994	FALSE	FALSE	FALSE	GCST90277260	0.0295018	0.0207702	6215	16	2679949	NA	NA	NA	NA	NA	NA	NA	0.014374	3.649e-10	35318	chr16	2679949	6605_17_IGFALS_IGFALS	2	1	TRUE
27	rs4699726	C	T	C	T	0.0517	-0.0414214	0.574107	FALSE	FALSE	FALSE	GCST90277260	0.0181834	0.0113639	6215	4	99178356	NA	NA	NA	NA	NA	NA	NA	0.008219	3.172e-10	35344	chr4	99178356	6605_17_IGFALS_IGFALS	2	1	TRUE
28	rs4786194	T	C	T	C	-0.3137	0.00930175	0.0176021	FALSE	FALSE	FALSE	GCST90277260	0.0693859	0.446678	6215	16	1503268	NA	NA	NA	NA	NA	NA	NA	0.027127	6.253e-31	35316	chr16	1503268	6605_17_IGFALS_IGFALS	2	1	TRUE
29	rs569213664	T	C	T	C	0.2342	0.0379552	0.0306138	FALSE	FALSE	FALSE	GCST90277260	0.0540125	0.241118	6215	3	172556442	TRUE	rs569213664	rs574044675	T	C	C	A	0.036037	8.097e-11	35354	chr3	172558731	6605_17_IGFALS_IGFALS	2	1	TRUE
30	rs61754523	T	C	T	C	-0.2312	0.050165	0.0122104	FALSE	FALSE	FALSE	GCST90277260	0.0860526	0.279961	6215	16	3729593	NA	NA	NA	NA	NA	NA	NA	0.028222	2.564e-16	35353	chr16	3729593	6605_17_IGFALS_IGFALS	2	1	TRUE
31	rs77971956	G	A	G	A	-0.8547	0.121051	0.0194296	FALSE	FALSE	FALSE	GCST90277260	0.0684567	0.0385066	6215	16	1177272	NA	NA	NA	NA	NA	NA	NA	0.051055	6.61e-63	35312	chr16	1177272	6605_17_IGFALS_IGFALS	2	1	TRUE
	SNP	effect_allele.exposure	other_allele.exposure	effect_allele.outcome	other_allele.outcome	beta.exposure	beta.outcome	eaf.outcome	remove	palindromic	ambiguous	id.outcome	se.outcome	pval.outcome	samplesize.outcome	chr.outcome	pos.outcome	proxy.outcome	target_snp.outcome	proxy_snp.outcome	target_a1.outcome	target_a2.outcome	proxy_a1.outcome	proxy_a2.outcome	se.exposure	pval.exposure	samplesize.exposure	chr.exposure	pos.exposure	exposure	action	SNP_index	mr_keep
1	rs10819325	TTTTTG	TTTTTC	C	G	-0.0681	-0.0329016	0.938897	TRUE	FALSE	FALSE	GCST90277307	0.0351984	0.174959	7004	9	127986347	TRUE	rs10819325	rs7859847	G	C	A	G	0.011745	6.694e-09	35351	chr9	127984543	3234_23_CCDC80_URB	2	1	FALSE
2	rs143501783	C	T	C	T	0.2418	-0.317704	0.0025504	FALSE	FALSE	FALSE	GCST90277307	0.173891	0.0338477	7004	17	7897001	NA	NA	NA	NA	NA	NA	NA	0.037171	7.77e-11	35373	chr17	7897001	3234_23_CCDC80_URB	2	1	TRUE
3	rs2142306	C	T	C	T	0.0939	-0.0142571	0.369621	FALSE	FALSE	FALSE	GCST90277307	0.0177774	0.211283	7004	8	133458388	NA	NA	NA	NA	NA	NA	NA	0.008224	3.392e-30	35374	chr8	133458388	3234_23_CCDC80_URB	2	1	TRUE
4	rs2978006	G	A	G	A	0.0694	-0.0194935	0.654981	FALSE	FALSE	FALSE	GCST90277307	0.0178507	0.13741	7004	8	133521519	NA	NA	NA	NA	NA	NA	NA	0.008464	2.411e-16	35373	chr8	133521519	3234_23_CCDC80_URB	2	1	TRUE
5	rs55714927	T	C	T	C	0.0783	-0.0283847	0.298609	FALSE	FALSE	FALSE	GCST90277307	0.0190909	0.0685314	7004	17	7169772	TRUE	rs55714927	rs62061425	T	C	G	A	0.010063	7.199e-15	35370	chr17	7176997	3234_23_CCDC80_URB	2	1	TRUE
6	rs6797920	G	A	G	A	0.0573	0.0147027	0.606261	FALSE	FALSE	FALSE	GCST90277307	0.0174395	0.199595	7004	3	112791263	NA	NA	NA	NA	NA	NA	NA	0.008514	1.698e-11	35362	chr3	112791263	3234_23_CCDC80_URB	2	1	TRUE
7	rs73669307	C	T	C	T	0.1006	0.0173948	0.0659014	FALSE	FALSE	FALSE	GCST90277307	0.0343674	0.306378	7004	9	127956218	NA	NA	NA	NA	NA	NA	NA	0.012719	2.592e-15	35355	chr9	127956218	3234_23_CCDC80_URB	2	1	TRUE
8	rs767298	TAACTAAT	GAACTAAT	A	C	0.0547	-0.0112783	0.641858	TRUE	FALSE	FALSE	GCST90277307	0.0177678	0.262792	7004	7	7234953	NA	NA	NA	NA	NA	NA	NA	0.008255	3.44e-11	35362	chr7	7234953	3234_23_CCDC80_URB	2	1	FALSE
9	rs9845240	A	G	A	G	0.0937	-0.0302502	0.32768	FALSE	FALSE	FALSE	GCST90277307	0.0180914	0.0472546	7004	3	112655985	NA	NA	NA	NA	NA	NA	NA	0.008481	2.238e-28	35354	chr3	112655985	3234_23_CCDC80_URB	2	1	TRUE
10	rs10935899	G	C	G	C	-0.0538	0.00685606	0.192925	FALSE	TRUE	TRUE	GCST90277307	0.021554	0.375209	7004	3	152767339	NA	NA	NA	NA	NA	NA	NA	0.009505	1.513e-08	35350	chr3	152767339	3004_67_PDCD1LG2_PD_L2	2	1	FALSE
11	rs12496730	C	G	C	G	-0.1258	0.0231091	0.434029	FALSE	TRUE	TRUE	GCST90277307	0.0170177	0.0872406	7004	3	98684125	TRUE	rs12496730	rs11927405	C	G	T	C	0.008131	5.34e-54	35330	chr3	98688089	3004_67_PDCD1LG2_PD_L2	2	1	FALSE
12	rs1354034	C	T	C	T	0.047	-0.00768736	0.712723	FALSE	FALSE	FALSE	GCST90277307	0.0184857	0.338758	7004	3	56815721	NA	NA	NA	NA	NA	NA	NA	0.008325	1.647e-08	35356	chr3	56815721	3004_67_PDCD1LG2_PD_L2	2	1	TRUE
13	rs17814462	T	G	T	G	0.1488	-0.0284928	0.0307293	FALSE	FALSE	FALSE	GCST90277307	0.0513093	0.28934	7004	9	4598881	NA	NA	NA	NA	NA	NA	NA	0.022151	1.848e-11	35380	chr9	4598881	3004_67_PDCD1LG2_PD_L2	2	1	TRUE
14	rs2146714	TTTC	TTTA	G	T	0.0499	-0.0125082	0.388282	TRUE	FALSE	FALSE	GCST90277307	0.0172697	0.234445	7004	9	5708176	TRUE	rs2146714	rs10975253	C	A	T	C	0.008491	4.18e-09	35367	chr9	5704225	3004_67_PDCD1LG2_PD_L2	2	1	FALSE
15	rs58970962	A	G	A	G	0.3579	-0.0186236	0.216649	FALSE	FALSE	FALSE	GCST90277307	0.0207535	0.18476	7004	9	5509678	NA	NA	NA	NA	NA	NA	NA	0.007938	1e-200	35367	chr9	5509678	3004_67_PDCD1LG2_PD_L2	2	1	TRUE
16	rs62560217	T	C	T	C	0.155	-0.0301334	0.0137763	FALSE	FALSE	FALSE	GCST90277307	0.0739504	0.341827	7004	9	5477636	NA	NA	NA	NA	NA	NA	NA	0.017835	3.603e-18	35366	chr9	5477636	3004_67_PDCD1LG2_PD_L2	2	1	TRUE
17	rs77533513	G	A	G	A	-0.1614	-0.0151869	0.0637921	FALSE	FALSE	FALSE	GCST90277307	0.0350556	0.332426	7004	9	5098105	NA	NA	NA	NA	NA	NA	NA	0.02286	1.66e-12	35370	chr9	5098105	3004_67_PDCD1LG2_PD_L2	2	1	TRUE
18	rs8176743	T	C	T	C	0.146	0.0131107	0.136473	FALSE	FALSE	FALSE	GCST90277307	0.0247318	0.298016	7004	9	133256028	NA	NA	NA	NA	NA	NA	NA	0.01656	1.184e-18	35370	chr9	133256028	3004_67_PDCD1LG2_PD_L2	2	1	TRUE
19	rs9438	C	G	C	G	-0.1411	-0.0153472	0.428587	FALSE	TRUE	TRUE	GCST90277307	0.0170187	0.183586	7004	3	154301098	NA	NA	NA	NA	NA	NA	NA	0.008213	3.679e-66	35346	chr3	154301098	3004_67_PDCD1LG2_PD_L2	2	1	FALSE
20	rs12484700	G	A	G	A	-0.0667	-0.0597136	0.191044	FALSE	FALSE	FALSE	GCST90277307	0.0216123	0.00286412	7004	22	43931393	NA	NA	NA	NA	NA	NA	NA	0.010885	8.915e-10	35372	chr22	43931393	6605_17_IGFALS_IGFALS	2	1	TRUE
21	rs184995649	TTGGC	GTGGC	A	C	-0.2888	0.0518068	0.0201058	TRUE	FALSE	FALSE	GCST90277307	0.0610144	0.197915	7004	16	3275320	NA	NA	NA	NA	NA	NA	NA	0.029446	1.044e-22	35340	chr16	3275320	6605_17_IGFALS_IGFALS	2	1	FALSE
22	rs1863622	C	T	C	T	0.0789	0.00348455	0.265273	FALSE	FALSE	FALSE	GCST90277307	0.0190146	0.427298	7004	3	186678827	NA	NA	NA	NA	NA	NA	NA	0.009542	1.357e-16	35368	chr3	186678827	6605_17_IGFALS_IGFALS	2	1	TRUE
23	rs191609731	A	G	A	G	-0.2813	-0.110136	0.00435235	FALSE	FALSE	FALSE	GCST90277307	0.141922	0.218865	7004	16	1157141	NA	NA	NA	NA	NA	NA	NA	0.031617	5.736e-19	35310	chr16	1157141	6605_17_IGFALS_IGFALS	2	1	TRUE
24	rs2854746	C	G	C	G	0.1601	0.0234306	0.3648	FALSE	TRUE	TRUE	GCST90277307	0.0177789	0.0937706	7004	7	45921046	NA	NA	NA	NA	NA	NA	NA	0.008692	9.143e-76	35347	chr7	45921046	6605_17_IGFALS_IGFALS	2	1	FALSE
25	rs35391516	A	G	A	G	0.2104	0.0193883	0.0531018	FALSE	FALSE	FALSE	GCST90277307	0.0382953	0.306329	7004	16	1793815	NA	NA	NA	NA	NA	NA	NA	0.014761	4.26e-46	35321	chr16	1793815	6605_17_IGFALS_IGFALS	2	1	TRUE
26	rs35801822	G	A	G	A	-0.0901	0.0063993	0.113994	FALSE	FALSE	FALSE	GCST90277307	0.027574	0.408239	7004	16	2679949	NA	NA	NA	NA	NA	NA	NA	0.014374	3.649e-10	35318	chr16	2679949	6605_17_IGFALS_IGFALS	2	1	TRUE
27	rs4699726	C	T	C	T	0.0517	0.00957413	0.574107	FALSE	FALSE	FALSE	GCST90277307	0.0170896	0.287661	7004	4	99178356	NA	NA	NA	NA	NA	NA	NA	0.008219	3.172e-10	35344	chr4	99178356	6605_17_IGFALS_IGFALS	2	1	TRUE
28	rs4786194	T	C	T	C	-0.3137	0.0268487	0.0176021	FALSE	FALSE	FALSE	GCST90277307	0.0664401	0.343068	7004	16	1503268	NA	NA	NA	NA	NA	NA	NA	0.027127	6.253e-31	35316	chr16	1503268	6605_17_IGFALS_IGFALS	2	1	TRUE
29	rs569213664	T	C	T	C	0.2342	0.011138	0.0306138	FALSE	FALSE	FALSE	GCST90277307	0.0511233	0.413767	7004	3	172556442	TRUE	rs569213664	rs574044675	T	C	C	A	0.036037	8.097e-11	35354	chr3	172558731	6605_17_IGFALS_IGFALS	2	1	TRUE
30	rs61754523	T	C	T	C	-0.2312	-0.0525896	0.0122104	FALSE	FALSE	FALSE	GCST90277307	0.0807395	0.257411	7004	16	3729593	NA	NA	NA	NA	NA	NA	NA	0.028222	2.564e-16	35353	chr16	3729593	6605_17_IGFALS_IGFALS	2	1	TRUE
31	rs77971956	G	A	G	A	-0.8547	0.105118	0.0194296	FALSE	FALSE	FALSE	GCST90277307	0.0631603	0.0480258	7004	16	1177272	NA	NA	NA	NA	NA	NA	NA	0.051055	6.61e-63	35312	chr16	1177272	6605_17_IGFALS_IGFALS	2	1	TRUE
	SNP	effect_allele.exposure	other_allele.exposure	effect_allele.outcome	other_allele.outcome	beta.exposure	beta.outcome	eaf.outcome	remove	palindromic	ambiguous	id.outcome	se.outcome	pval.outcome	samplesize.outcome	chr.outcome	pos.outcome	proxy.outcome	target_snp.outcome	proxy_snp.outcome	target_a1.outcome	target_a2.outcome	proxy_a1.outcome	proxy_a2.outcome	se.exposure	pval.exposure	samplesize.exposure	chr.exposure	pos.exposure	exposure	action	SNP_index	mr_keep
1	rs10819325	TTTTTG	TTTTTC	C	G	-0.0681	-0.0013682	0.938897	TRUE	FALSE	FALSE	GCST90277319	0.0390254	0.486016	5658	9	127986347	TRUE	rs10819325	rs7859847	G	C	A	G	0.011745	6.694e-09	35351	chr9	127984543	3234_23_CCDC80_URB	2	1	FALSE
2	rs143501783	C	T	C	T	0.2418	-0.131234	0.0025504	FALSE	FALSE	FALSE	GCST90277319	0.184618	0.238591	5658	17	7897001	NA	NA	NA	NA	NA	NA	NA	0.037171	7.77e-11	35373	chr17	7897001	3234_23_CCDC80_URB	2	1	TRUE
3	rs2142306	C	T	C	T	0.0939	0.00836713	0.369621	FALSE	FALSE	FALSE	GCST90277319	0.0197614	0.335999	5658	8	133458388	NA	NA	NA	NA	NA	NA	NA	0.008224	3.392e-30	35374	chr8	133458388	3234_23_CCDC80_URB	2	1	TRUE
4	rs2978006	G	A	G	A	0.0694	3.52993e-05	0.654981	FALSE	FALSE	FALSE	GCST90277319	0.0197413	0.499287	5658	8	133521519	NA	NA	NA	NA	NA	NA	NA	0.008464	2.411e-16	35373	chr8	133521519	3234_23_CCDC80_URB	2	1	TRUE
5	rs55714927	T	C	T	C	0.0783	-0.0440087	0.298609	FALSE	FALSE	FALSE	GCST90277319	0.0212292	0.0190849	5658	17	7169772	TRUE	rs55714927	rs62061425	T	C	G	A	0.010063	7.199e-15	35370	chr17	7176997	3234_23_CCDC80_URB	2	1	TRUE
6	rs6797920	G	A	G	A	0.0573	0.00395262	0.606261	FALSE	FALSE	FALSE	GCST90277319	0.0192308	0.418577	5658	3	112791263	NA	NA	NA	NA	NA	NA	NA	0.008514	1.698e-11	35362	chr3	112791263	3234_23_CCDC80_URB	2	1	TRUE
7	rs73669307	C	T	C	T	0.1006	0.00849884	0.0659014	FALSE	FALSE	FALSE	GCST90277319	0.0384739	0.412586	5658	9	127956218	NA	NA	NA	NA	NA	NA	NA	0.012719	2.592e-15	35355	chr9	127956218	3234_23_CCDC80_URB	2	1	TRUE
8	rs767298	TAACTAAT	GAACTAAT	A	C	0.0547	0.0182302	0.641858	TRUE	FALSE	FALSE	GCST90277319	0.0197695	0.178228	5658	7	7234953	NA	NA	NA	NA	NA	NA	NA	0.008255	3.44e-11	35362	chr7	7234953	3234_23_CCDC80_URB	2	1	FALSE
9	rs9845240	A	G	A	G	0.0937	0.0031392	0.32768	FALSE	FALSE	FALSE	GCST90277319	0.0200382	0.437756	5658	3	112655985	NA	NA	NA	NA	NA	NA	NA	0.008481	2.238e-28	35354	chr3	112655985	3234_23_CCDC80_URB	2	1	TRUE
10	rs10935899	G	C	G	C	-0.0538	-0.0213113	0.192925	FALSE	TRUE	TRUE	GCST90277319	0.0238496	0.185776	5658	3	152767339	NA	NA	NA	NA	NA	NA	NA	0.009505	1.513e-08	35350	chr3	152767339	3004_67_PDCD1LG2_PD_L2	2	1	FALSE
11	rs12496730	C	G	C	G	-0.1258	0.000184991	0.434029	FALSE	TRUE	TRUE	GCST90277319	0.0189493	0.496105	5658	3	98684125	TRUE	rs12496730	rs11927405	C	G	T	C	0.008131	5.34e-54	35330	chr3	98688089	3004_67_PDCD1LG2_PD_L2	2	1	FALSE
12	rs1354034	C	T	C	T	0.047	0.0265461	0.712723	FALSE	FALSE	FALSE	GCST90277319	0.0205936	0.098691	5658	3	56815721	NA	NA	NA	NA	NA	NA	NA	0.008325	1.647e-08	35356	chr3	56815721	3004_67_PDCD1LG2_PD_L2	2	1	TRUE
13	rs17814462	T	G	T	G	0.1488	-0.133731	0.0307293	FALSE	FALSE	FALSE	GCST90277319	0.0560493	0.00851746	5658	9	4598881	NA	NA	NA	NA	NA	NA	NA	0.022151	1.848e-11	35380	chr9	4598881	3004_67_PDCD1LG2_PD_L2	2	1	TRUE
14	rs2146714	TTTC	TTTA	G	T	0.0499	-0.0338312	0.388282	TRUE	FALSE	FALSE	GCST90277319	0.0192413	0.0393517	5658	9	5708176	TRUE	rs2146714	rs10975253	C	A	T	C	0.008491	4.18e-09	35367	chr9	5704225	3004_67_PDCD1LG2_PD_L2	2	1	FALSE
15	rs58970962	A	G	A	G	0.3579	0.00363692	0.216649	FALSE	FALSE	FALSE	GCST90277319	0.0232173	0.437762	5658	9	5509678	NA	NA	NA	NA	NA	NA	NA	0.007938	1e-200	35367	chr9	5509678	3004_67_PDCD1LG2_PD_L2	2	1	TRUE
16	rs62560217	T	C	T	C	0.155	-0.131962	0.0137763	FALSE	FALSE	FALSE	GCST90277319	0.0834706	0.0569459	5658	9	5477636	NA	NA	NA	NA	NA	NA	NA	0.017835	3.603e-18	35366	chr9	5477636	3004_67_PDCD1LG2_PD_L2	2	1	TRUE
17	rs77533513	G	A	G	A	-0.1614	-0.00126825	0.0637921	FALSE	FALSE	FALSE	GCST90277319	0.038802	0.486963	5658	9	5098105	NA	NA	NA	NA	NA	NA	NA	0.02286	1.66e-12	35370	chr9	5098105	3004_67_PDCD1LG2_PD_L2	2	1	TRUE
18	rs8176743	T	C	T	C	0.146	0.0555327	0.136473	FALSE	FALSE	FALSE	GCST90277319	0.0275456	0.0218985	5658	9	133256028	NA	NA	NA	NA	NA	NA	NA	0.01656	1.184e-18	35370	chr9	133256028	3004_67_PDCD1LG2_PD_L2	2	1	TRUE
19	rs9438	C	G	C	G	-0.1411	0.0116401	0.428587	FALSE	TRUE	TRUE	GCST90277319	0.0188223	0.268149	5658	3	154301098	NA	NA	NA	NA	NA	NA	NA	0.008213	3.679e-66	35346	chr3	154301098	3004_67_PDCD1LG2_PD_L2	2	1	FALSE
20	rs12484700	G	A	G	A	-0.0667	0.0195849	0.191044	FALSE	FALSE	FALSE	GCST90277319	0.0241217	0.208419	5658	22	43931393	NA	NA	NA	NA	NA	NA	NA	0.010885	8.915e-10	35372	chr22	43931393	6605_17_IGFALS_IGFALS	2	1	TRUE
21	rs184995649	TTGGC	GTGGC	A	C	-0.2888	-0.0699683	0.0201058	TRUE	FALSE	FALSE	GCST90277319	0.0679316	0.151509	5658	16	3275320	NA	NA	NA	NA	NA	NA	NA	0.029446	1.044e-22	35340	chr16	3275320	6605_17_IGFALS_IGFALS	2	1	FALSE
22	rs1863622	C	T	C	T	0.0789	-0.0242049	0.265273	FALSE	FALSE	FALSE	GCST90277319	0.0210977	0.125634	5658	3	186678827	NA	NA	NA	NA	NA	NA	NA	0.009542	1.357e-16	35368	chr3	186678827	6605_17_IGFALS_IGFALS	2	1	TRUE
23	rs191609731	A	G	A	G	-0.2813	0.0375268	0.00435235	FALSE	FALSE	FALSE	GCST90277319	0.159389	0.406933	5658	16	1157141	NA	NA	NA	NA	NA	NA	NA	0.031617	5.736e-19	35310	chr16	1157141	6605_17_IGFALS_IGFALS	2	1	TRUE
24	rs2854746	C	G	C	G	0.1601	-0.0287451	0.3648	FALSE	TRUE	TRUE	GCST90277319	0.0196779	0.0720378	5658	7	45921046	NA	NA	NA	NA	NA	NA	NA	0.008692	9.143e-76	35347	chr7	45921046	6605_17_IGFALS_IGFALS	2	1	FALSE
25	rs35391516	A	G	A	G	0.2104	-0.0425671	0.0531018	FALSE	FALSE	FALSE	GCST90277319	0.0422228	0.15669	5658	16	1793815	NA	NA	NA	NA	NA	NA	NA	0.014761	4.26e-46	35321	chr16	1793815	6605_17_IGFALS_IGFALS	2	1	TRUE
26	rs35801822	G	A	G	A	-0.0901	0.0167231	0.113994	FALSE	FALSE	FALSE	GCST90277319	0.030634	0.292567	5658	16	2679949	NA	NA	NA	NA	NA	NA	NA	0.014374	3.649e-10	35318	chr16	2679949	6605_17_IGFALS_IGFALS	2	1	TRUE
27	rs4699726	C	T	C	T	0.0517	-0.0574128	0.574107	FALSE	FALSE	FALSE	GCST90277319	0.0189308	0.00121159	5658	4	99178356	NA	NA	NA	NA	NA	NA	NA	0.008219	3.172e-10	35344	chr4	99178356	6605_17_IGFALS_IGFALS	2	1	TRUE
28	rs4786194	T	C	T	C	-0.3137	-0.043961	0.0176021	FALSE	FALSE	FALSE	GCST90277319	0.0736086	0.275178	5658	16	1503268	NA	NA	NA	NA	NA	NA	NA	0.027127	6.253e-31	35316	chr16	1503268	6605_17_IGFALS_IGFALS	2	1	TRUE
29	rs569213664	T	C	T	C	0.2342	0.0243309	0.0306138	FALSE	FALSE	FALSE	GCST90277319	0.0579172	0.337207	5658	3	172556442	TRUE	rs569213664	rs574044675	T	C	C	A	0.036037	8.097e-11	35354	chr3	172558731	6605_17_IGFALS_IGFALS	2	1	TRUE
30	rs61754523	T	C	T	C	-0.2312	-0.126428	0.0122104	FALSE	FALSE	FALSE	GCST90277319	0.0910343	0.0824475	5658	16	3729593	NA	NA	NA	NA	NA	NA	NA	0.028222	2.564e-16	35353	chr16	3729593	6605_17_IGFALS_IGFALS	2	1	TRUE
31	rs77971956	G	A	G	A	-0.8547	-0.00153972	0.0194296	FALSE	FALSE	FALSE	GCST90277319	0.0713128	0.491387	5658	16	1177272	NA	NA	NA	NA	NA	NA	NA	0.051055	6.61e-63	35312	chr16	1177272	6605_17_IGFALS_IGFALS	2	1	TRUE
	SNP	effect_allele.exposure	other_allele.exposure	effect_allele.outcome	other_allele.outcome	beta.exposure	beta.outcome	eaf.outcome	remove	palindromic	ambiguous	id.outcome	se.outcome	pval.outcome	samplesize.outcome	chr.outcome	pos.outcome	proxy.outcome	target_snp.outcome	proxy_snp.outcome	target_a1.outcome	target_a2.outcome	proxy_a1.outcome	proxy_a2.outcome	se.exposure	pval.exposure	samplesize.exposure	chr.exposure	pos.exposure	exposure	action	SNP_index	mr_keep
1	rs10819325	TTTTTG	TTTTTC	C	G	-0.0681	0.00963159	0.938897	TRUE	FALSE	FALSE	GCST90277328	0.0347961	0.390967	7096	9	127986347	TRUE	rs10819325	rs7859847	G	C	A	G	0.011745	6.694e-09	35351	chr9	127984543	3234_23_CCDC80_URB	2	1	FALSE
2	rs143501783	C	T	C	T	0.2418	0.0194896	0.0025504	FALSE	FALSE	FALSE	GCST90277328	0.168754	0.454028	7096	17	7897001	NA	NA	NA	NA	NA	NA	NA	0.037171	7.77e-11	35373	chr17	7897001	3234_23_CCDC80_URB	2	1	TRUE
3	rs2142306	C	T	C	T	0.0939	-0.000374739	0.369621	FALSE	FALSE	FALSE	GCST90277328	0.0176702	0.49154	7096	8	133458388	NA	NA	NA	NA	NA	NA	NA	0.008224	3.392e-30	35374	chr8	133458388	3234_23_CCDC80_URB	2	1	TRUE
4	rs2978006	G	A	G	A	0.0694	-0.0201174	0.654981	FALSE	FALSE	FALSE	GCST90277328	0.0177254	0.128199	7096	8	133521519	NA	NA	NA	NA	NA	NA	NA	0.008464	2.411e-16	35373	chr8	133521519	3234_23_CCDC80_URB	2	1	TRUE
5	rs55714927	T	C	T	C	0.0783	0.0138012	0.298609	FALSE	FALSE	FALSE	GCST90277328	0.0189099	0.232744	7096	17	7169772	TRUE	rs55714927	rs62061425	T	C	G	A	0.010063	7.199e-15	35370	chr17	7176997	3234_23_CCDC80_URB	2	1	TRUE
6	rs6797920	G	A	G	A	0.0573	-0.0189187	0.606261	FALSE	FALSE	FALSE	GCST90277328	0.0173222	0.13738	7096	3	112791263	NA	NA	NA	NA	NA	NA	NA	0.008514	1.698e-11	35362	chr3	112791263	3234_23_CCDC80_URB	2	1	TRUE
7	rs73669307	C	T	C	T	0.1006	-0.0497046	0.0659014	FALSE	FALSE	FALSE	GCST90277328	0.0340853	0.072387	7096	9	127956218	NA	NA	NA	NA	NA	NA	NA	0.012719	2.592e-15	35355	chr9	127956218	3234_23_CCDC80_URB	2	1	TRUE
8	rs767298	TAACTAAT	GAACTAAT	A	C	0.0547	0.00458233	0.641858	TRUE	FALSE	FALSE	GCST90277328	0.017632	0.397475	7096	7	7234953	NA	NA	NA	NA	NA	NA	NA	0.008255	3.44e-11	35362	chr7	7234953	3234_23_CCDC80_URB	2	1	FALSE
9	rs9845240	A	G	A	G	0.0937	-0.0211873	0.32768	FALSE	FALSE	FALSE	GCST90277328	0.0179819	0.119347	7096	3	112655985	NA	NA	NA	NA	NA	NA	NA	0.008481	2.238e-28	35354	chr3	112655985	3234_23_CCDC80_URB	2	1	TRUE
10	rs10935899	G	C	G	C	-0.0538	0.0195398	0.192925	FALSE	TRUE	TRUE	GCST90277328	0.0213767	0.18034	7096	3	152767339	NA	NA	NA	NA	NA	NA	NA	0.009505	1.513e-08	35350	chr3	152767339	3004_67_PDCD1LG2_PD_L2	2	1	FALSE
11	rs12496730	C	G	C	G	-0.1258	-0.0189856	0.434029	FALSE	TRUE	TRUE	GCST90277328	0.0168875	0.130456	7096	3	98684125	TRUE	rs12496730	rs11927405	C	G	T	C	0.008131	5.34e-54	35330	chr3	98688089	3004_67_PDCD1LG2_PD_L2	2	1	FALSE
12	rs1354034	C	T	C	T	0.047	-0.0164738	0.712723	FALSE	FALSE	FALSE	GCST90277328	0.0183399	0.184526	7096	3	56815721	NA	NA	NA	NA	NA	NA	NA	0.008325	1.647e-08	35356	chr3	56815721	3004_67_PDCD1LG2_PD_L2	2	1	TRUE
13	rs17814462	T	G	T	G	0.1488	-0.052502	0.0307293	FALSE	FALSE	FALSE	GCST90277328	0.0510674	0.151953	7096	9	4598881	NA	NA	NA	NA	NA	NA	NA	0.022151	1.848e-11	35380	chr9	4598881	3004_67_PDCD1LG2_PD_L2	2	1	TRUE
14	rs2146714	TTTC	TTTA	G	T	0.0499	0.0113796	0.388282	TRUE	FALSE	FALSE	GCST90277328	0.0171537	0.25354	7096	9	5708176	TRUE	rs2146714	rs10975253	C	A	T	C	0.008491	4.18e-09	35367	chr9	5704225	3004_67_PDCD1LG2_PD_L2	2	1	FALSE
15	rs58970962	A	G	A	G	0.3579	0.0330775	0.216649	FALSE	FALSE	FALSE	GCST90277328	0.0205979	0.0541515	7096	9	5509678	NA	NA	NA	NA	NA	NA	NA	0.007938	1e-200	35367	chr9	5509678	3004_67_PDCD1LG2_PD_L2	2	1	TRUE
16	rs62560217	T	C	T	C	0.155	0.0701996	0.0137763	FALSE	FALSE	FALSE	GCST90277328	0.0745134	0.173069	7096	9	5477636	NA	NA	NA	NA	NA	NA	NA	0.017835	3.603e-18	35366	chr9	5477636	3004_67_PDCD1LG2_PD_L2	2	1	TRUE
17	rs77533513	G	A	G	A	-0.1614	0.0517115	0.0637921	FALSE	FALSE	FALSE	GCST90277328	0.0348066	0.0686818	7096	9	5098105	NA	NA	NA	NA	NA	NA	NA	0.02286	1.66e-12	35370	chr9	5098105	3004_67_PDCD1LG2_PD_L2	2	1	TRUE
18	rs8176743	T	C	T	C	0.146	0.0145483	0.136473	FALSE	FALSE	FALSE	GCST90277328	0.0245132	0.276427	7096	9	133256028	NA	NA	NA	NA	NA	NA	NA	0.01656	1.184e-18	35370	chr9	133256028	3004_67_PDCD1LG2_PD_L2	2	1	TRUE
19	rs9438	C	G	C	G	-0.1411	-0.0325725	0.428587	FALSE	TRUE	TRUE	GCST90277328	0.0168749	0.0267889	7096	3	154301098	NA	NA	NA	NA	NA	NA	NA	0.008213	3.679e-66	35346	chr3	154301098	3004_67_PDCD1LG2_PD_L2	2	1	FALSE
20	rs12484700	G	A	G	A	-0.0667	0.0237981	0.191044	FALSE	FALSE	FALSE	GCST90277328	0.0214788	0.133935	7096	22	43931393	NA	NA	NA	NA	NA	NA	NA	0.010885	8.915e-10	35372	chr22	43931393	6605_17_IGFALS_IGFALS	2	1	TRUE
21	rs184995649	TTGGC	GTGGC	A	C	-0.2888	-0.024692	0.0201058	TRUE	FALSE	FALSE	GCST90277328	0.060446	0.341454	7096	16	3275320	NA	NA	NA	NA	NA	NA	NA	0.029446	1.044e-22	35340	chr16	3275320	6605_17_IGFALS_IGFALS	2	1	FALSE
22	rs1863622	C	T	C	T	0.0789	0.020815	0.265273	FALSE	FALSE	FALSE	GCST90277328	0.0188618	0.134893	7096	3	186678827	NA	NA	NA	NA	NA	NA	NA	0.009542	1.357e-16	35368	chr3	186678827	6605_17_IGFALS_IGFALS	2	1	TRUE
23	rs191609731	A	G	A	G	-0.2813	-0.074394	0.00435235	FALSE	FALSE	FALSE	GCST90277328	0.140668	0.29845	7096	16	1157141	NA	NA	NA	NA	NA	NA	NA	0.031617	5.736e-19	35310	chr16	1157141	6605_17_IGFALS_IGFALS	2	1	TRUE
24	rs2854746	C	G	C	G	0.1601	-0.012123	0.3648	FALSE	TRUE	TRUE	GCST90277328	0.0176341	0.245892	7096	7	45921046	NA	NA	NA	NA	NA	NA	NA	0.008692	9.143e-76	35347	chr7	45921046	6605_17_IGFALS_IGFALS	2	1	FALSE
25	rs35391516	A	G	A	G	0.2104	-0.0542173	0.0531018	FALSE	FALSE	FALSE	GCST90277328	0.0379224	0.0764029	7096	16	1793815	NA	NA	NA	NA	NA	NA	NA	0.014761	4.26e-46	35321	chr16	1793815	6605_17_IGFALS_IGFALS	2	1	TRUE
26	rs35801822	G	A	G	A	-0.0901	0.00625378	0.113994	FALSE	FALSE	FALSE	GCST90277328	0.0274032	0.40974	7096	16	2679949	NA	NA	NA	NA	NA	NA	NA	0.014374	3.649e-10	35318	chr16	2679949	6605_17_IGFALS_IGFALS	2	1	TRUE
27	rs4699726	C	T	C	T	0.0517	-0.0144914	0.574107	FALSE	FALSE	FALSE	GCST90277328	0.0170035	0.197035	7096	4	99178356	NA	NA	NA	NA	NA	NA	NA	0.008219	3.172e-10	35344	chr4	99178356	6605_17_IGFALS_IGFALS	2	1	TRUE
28	rs4786194	T	C	T	C	-0.3137	0.0436809	0.0176021	FALSE	FALSE	FALSE	GCST90277328	0.0653128	0.251813	7096	16	1503268	NA	NA	NA	NA	NA	NA	NA	0.027127	6.253e-31	35316	chr16	1503268	6605_17_IGFALS_IGFALS	2	1	TRUE
29	rs569213664	T	C	T	C	0.2342	-0.0331859	0.0306138	FALSE	FALSE	FALSE	GCST90277328	0.0505846	0.255897	7096	3	172556442	TRUE	rs569213664	rs574044675	T	C	C	A	0.036037	8.097e-11	35354	chr3	172558731	6605_17_IGFALS_IGFALS	2	1	TRUE
30	rs61754523	T	C	T	C	-0.2312	-0.0936692	0.0122104	FALSE	FALSE	FALSE	GCST90277328	0.0806675	0.122785	7096	16	3729593	NA	NA	NA	NA	NA	NA	NA	0.028222	2.564e-16	35353	chr16	3729593	6605_17_IGFALS_IGFALS	2	1	TRUE
31	rs77971956	G	A	G	A	-0.8547	-0.0805368	0.0194296	FALSE	FALSE	FALSE	GCST90277328	0.0628599	0.10006	7096	16	1177272	NA	NA	NA	NA	NA	NA	NA	0.051055	6.61e-63	35312	chr16	1177272	6605_17_IGFALS_IGFALS	2	1	TRUE
	SNP	effect_allele.exposure	other_allele.exposure	effect_allele.outcome	other_allele.outcome	beta.exposure	beta.outcome	eaf.outcome	remove	palindromic	ambiguous	id.outcome	se.outcome	pval.outcome	samplesize.outcome	chr.outcome	pos.outcome	proxy.outcome	target_snp.outcome	proxy_snp.outcome	target_a1.outcome	target_a2.outcome	proxy_a1.outcome	proxy_a2.outcome	se.exposure	pval.exposure	samplesize.exposure	chr.exposure	pos.exposure	exposure	action	SNP_index	mr_keep
1	rs10819325	TTTTTG	TTTTTC	C	G	-0.0681	-0.0015563	0.938897	TRUE	FALSE	FALSE	GCST90277345	0.0394445	0.484264	5462	9	127986347	TRUE	rs10819325	rs7859847	G	C	A	G	0.011745	6.694e-09	35351	chr9	127984543	3234_23_CCDC80_URB	2	1	FALSE
2	rs143501783	C	T	C	T	0.2418	0.0916378	0.0025504	FALSE	FALSE	FALSE	GCST90277345	0.186986	0.312039	5462	17	7897001	NA	NA	NA	NA	NA	NA	NA	0.037171	7.77e-11	35373	chr17	7897001	3234_23_CCDC80_URB	2	1	TRUE
3	rs2142306	C	T	C	T	0.0939	-0.0192297	0.369621	FALSE	FALSE	FALSE	GCST90277345	0.0201182	0.169578	5462	8	133458388	NA	NA	NA	NA	NA	NA	NA	0.008224	3.392e-30	35374	chr8	133458388	3234_23_CCDC80_URB	2	1	TRUE
4	rs2978006	G	A	G	A	0.0694	-0.0219848	0.654981	FALSE	FALSE	FALSE	GCST90277345	0.0202702	0.139052	5462	8	133521519	NA	NA	NA	NA	NA	NA	NA	0.008464	2.411e-16	35373	chr8	133521519	3234_23_CCDC80_URB	2	1	TRUE
5	rs55714927	T	C	T	C	0.0783	0.00239281	0.298609	FALSE	FALSE	FALSE	GCST90277345	0.0215976	0.455891	5462	17	7169772	TRUE	rs55714927	rs62061425	T	C	G	A	0.010063	7.199e-15	35370	chr17	7176997	3234_23_CCDC80_URB	2	1	TRUE
6	rs6797920	G	A	G	A	0.0573	0.00318174	0.606261	FALSE	FALSE	FALSE	GCST90277345	0.019719	0.435907	5462	3	112791263	NA	NA	NA	NA	NA	NA	NA	0.008514	1.698e-11	35362	chr3	112791263	3234_23_CCDC80_URB	2	1	TRUE
7	rs73669307	C	T	C	T	0.1006	-0.0151719	0.0659014	FALSE	FALSE	FALSE	GCST90277345	0.038725	0.347608	5462	9	127956218	NA	NA	NA	NA	NA	NA	NA	0.012719	2.592e-15	35355	chr9	127956218	3234_23_CCDC80_URB	2	1	TRUE
8	rs767298	TAACTAAT	GAACTAAT	A	C	0.0547	0.0185121	0.641858	TRUE	FALSE	FALSE	GCST90277345	0.0201674	0.17933	5462	7	7234953	NA	NA	NA	NA	NA	NA	NA	0.008255	3.44e-11	35362	chr7	7234953	3234_23_CCDC80_URB	2	1	FALSE
9	rs9845240	A	G	A	G	0.0937	-0.00335685	0.32768	FALSE	FALSE	FALSE	GCST90277345	0.0203765	0.434574	5462	3	112655985	NA	NA	NA	NA	NA	NA	NA	0.008481	2.238e-28	35354	chr3	112655985	3234_23_CCDC80_URB	2	1	TRUE
10	rs10935899	G	C	G	C	-0.0538	-0.0216649	0.192925	FALSE	TRUE	TRUE	GCST90277345	0.0245795	0.189045	5462	3	152767339	NA	NA	NA	NA	NA	NA	NA	0.009505	1.513e-08	35350	chr3	152767339	3004_67_PDCD1LG2_PD_L2	2	1	FALSE
11	rs12496730	C	G	C	G	-0.1258	0.0015022	0.434029	FALSE	TRUE	TRUE	GCST90277345	0.019342	0.469047	5462	3	98684125	TRUE	rs12496730	rs11927405	C	G	T	C	0.008131	5.34e-54	35330	chr3	98688089	3004_67_PDCD1LG2_PD_L2	2	1	FALSE
12	rs1354034	C	T	C	T	0.047	0.00584461	0.712723	FALSE	FALSE	FALSE	GCST90277345	0.0209945	0.390357	5462	3	56815721	NA	NA	NA	NA	NA	NA	NA	0.008325	1.647e-08	35356	chr3	56815721	3004_67_PDCD1LG2_PD_L2	2	1	TRUE
13	rs17814462	T	G	T	G	0.1488	-0.0267626	0.0307293	FALSE	FALSE	FALSE	GCST90277345	0.0582328	0.322909	5462	9	4598881	NA	NA	NA	NA	NA	NA	NA	0.022151	1.848e-11	35380	chr9	4598881	3004_67_PDCD1LG2_PD_L2	2	1	TRUE
14	rs2146714	TTTC	TTTA	G	T	0.0499	0.000606881	0.388282	TRUE	FALSE	FALSE	GCST90277345	0.0195243	0.487602	5462	9	5708176	TRUE	rs2146714	rs10975253	C	A	T	C	0.008491	4.18e-09	35367	chr9	5704225	3004_67_PDCD1LG2_PD_L2	2	1	FALSE
15	rs58970962	A	G	A	G	0.3579	0.00984655	0.216649	FALSE	FALSE	FALSE	GCST90277345	0.023341	0.336565	5462	9	5509678	NA	NA	NA	NA	NA	NA	NA	0.007938	1e-200	35367	chr9	5509678	3004_67_PDCD1LG2_PD_L2	2	1	TRUE
16	rs62560217	T	C	T	C	0.155	0.0365871	0.0137763	FALSE	FALSE	FALSE	GCST90277345	0.084353	0.332239	5462	9	5477636	NA	NA	NA	NA	NA	NA	NA	0.017835	3.603e-18	35366	chr9	5477636	3004_67_PDCD1LG2_PD_L2	2	1	TRUE
17	rs77533513	G	A	G	A	-0.1614	0.00870874	0.0637921	FALSE	FALSE	FALSE	GCST90277345	0.0395773	0.412919	5462	9	5098105	NA	NA	NA	NA	NA	NA	NA	0.02286	1.66e-12	35370	chr9	5098105	3004_67_PDCD1LG2_PD_L2	2	1	TRUE
18	rs8176743	T	C	T	C	0.146	0.0157808	0.136473	FALSE	FALSE	FALSE	GCST90277345	0.0278116	0.285215	5462	9	133256028	NA	NA	NA	NA	NA	NA	NA	0.01656	1.184e-18	35370	chr9	133256028	3004_67_PDCD1LG2_PD_L2	2	1	TRUE
19	rs9438	C	G	C	G	-0.1411	0.0451903	0.428587	FALSE	TRUE	TRUE	GCST90277345	0.0191719	0.00920887	5462	3	154301098	NA	NA	NA	NA	NA	NA	NA	0.008213	3.679e-66	35346	chr3	154301098	3004_67_PDCD1LG2_PD_L2	2	1	FALSE
20	rs12484700	G	A	G	A	-0.0667	-0.00695618	0.191044	FALSE	FALSE	FALSE	GCST90277345	0.0243888	0.387738	5462	22	43931393	NA	NA	NA	NA	NA	NA	NA	0.010885	8.915e-10	35372	chr22	43931393	6605_17_IGFALS_IGFALS	2	1	TRUE
21	rs184995649	TTGGC	GTGGC	A	C	-0.2888	-0.0297934	0.0201058	TRUE	FALSE	FALSE	GCST90277345	0.0687382	0.33235	5462	16	3275320	NA	NA	NA	NA	NA	NA	NA	0.029446	1.044e-22	35340	chr16	3275320	6605_17_IGFALS_IGFALS	2	1	FALSE
22	rs1863622	C	T	C	T	0.0789	-0.0505046	0.265273	FALSE	FALSE	FALSE	GCST90277345	0.0213619	0.00903362	5462	3	186678827	NA	NA	NA	NA	NA	NA	NA	0.009542	1.357e-16	35368	chr3	186678827	6605_17_IGFALS_IGFALS	2	1	TRUE
23	rs191609731	A	G	A	G	-0.2813	-0.0959459	0.00435235	FALSE	FALSE	FALSE	GCST90277345	0.155209	0.268231	5462	16	1157141	NA	NA	NA	NA	NA	NA	NA	0.031617	5.736e-19	35310	chr16	1157141	6605_17_IGFALS_IGFALS	2	1	TRUE
24	rs2854746	C	G	C	G	0.1601	-0.0135987	0.3648	FALSE	TRUE	TRUE	GCST90277345	0.0201845	0.250245	5462	7	45921046	NA	NA	NA	NA	NA	NA	NA	0.008692	9.143e-76	35347	chr7	45921046	6605_17_IGFALS_IGFALS	2	1	FALSE
25	rs35391516	A	G	A	G	0.2104	0.0158603	0.0531018	FALSE	FALSE	FALSE	GCST90277345	0.0434842	0.357654	5462	16	1793815	NA	NA	NA	NA	NA	NA	NA	0.014761	4.26e-46	35321	chr16	1793815	6605_17_IGFALS_IGFALS	2	1	TRUE
26	rs35801822	G	A	G	A	-0.0901	0.0183679	0.113994	FALSE	FALSE	FALSE	GCST90277345	0.031541	0.280165	5462	16	2679949	NA	NA	NA	NA	NA	NA	NA	0.014374	3.649e-10	35318	chr16	2679949	6605_17_IGFALS_IGFALS	2	1	TRUE
27	rs4699726	C	T	C	T	0.0517	-0.0177626	0.574107	FALSE	FALSE	FALSE	GCST90277345	0.0193322	0.179098	5462	4	99178356	NA	NA	NA	NA	NA	NA	NA	0.008219	3.172e-10	35344	chr4	99178356	6605_17_IGFALS_IGFALS	2	1	TRUE
28	rs4786194	T	C	T	C	-0.3137	-0.00945309	0.0176021	FALSE	FALSE	FALSE	GCST90277345	0.0780869	0.451822	5462	16	1503268	NA	NA	NA	NA	NA	NA	NA	0.027127	6.253e-31	35316	chr16	1503268	6605_17_IGFALS_IGFALS	2	1	TRUE
29	rs569213664	T	C	T	C	0.2342	-0.0700511	0.0306138	FALSE	FALSE	FALSE	GCST90277345	0.0577425	0.112534	5462	3	172556442	TRUE	rs569213664	rs574044675	T	C	C	A	0.036037	8.097e-11	35354	chr3	172558731	6605_17_IGFALS_IGFALS	2	1	TRUE
30	rs61754523	T	C	T	C	-0.2312	-0.0218298	0.0122104	FALSE	FALSE	FALSE	GCST90277345	0.0949284	0.409061	5462	16	3729593	NA	NA	NA	NA	NA	NA	NA	0.028222	2.564e-16	35353	chr16	3729593	6605_17_IGFALS_IGFALS	2	1	TRUE
31	rs77971956	G	A	G	A	-0.8547	0.0463794	0.0194296	FALSE	FALSE	FALSE	GCST90277345	0.0724297	0.260977	5462	16	1177272	NA	NA	NA	NA	NA	NA	NA	0.051055	6.61e-63	35312	chr16	1177272	6605_17_IGFALS_IGFALS	2	1	TRUE
	SNP	effect_allele.exposure	other_allele.exposure	effect_allele.outcome	other_allele.outcome	beta.exposure	beta.outcome	eaf.outcome	remove	palindromic	ambiguous	id.outcome	se.outcome	pval.outcome	samplesize.outcome	chr.outcome	pos.outcome	proxy.outcome	target_snp.outcome	proxy_snp.outcome	target_a1.outcome	target_a2.outcome	proxy_a1.outcome	proxy_a2.outcome	se.exposure	pval.exposure	samplesize.exposure	chr.exposure	pos.exposure	exposure	action	SNP_index	mr_keep
1	rs10819325	TTTTTG	TTTTTC	C	G	-0.0681	0.0362339	0.938897	TRUE	FALSE	FALSE	GCST90277349	0.0349098	0.149652	7045	9	127986347	TRUE	rs10819325	rs7859847	G	C	A	G	0.011745	6.694e-09	35351	chr9	127984543	3234_23_CCDC80_URB	2	1	FALSE
2	rs143501783	C	T	C	T	0.2418	0.0569777	0.0025504	FALSE	FALSE	FALSE	GCST90277349	0.171729	0.370025	7045	17	7897001	NA	NA	NA	NA	NA	NA	NA	0.037171	7.77e-11	35373	chr17	7897001	3234_23_CCDC80_URB	2	1	TRUE
3	rs2142306	C	T	C	T	0.0939	-0.0174267	0.369621	FALSE	FALSE	FALSE	GCST90277349	0.0177696	0.16337	7045	8	133458388	NA	NA	NA	NA	NA	NA	NA	0.008224	3.392e-30	35374	chr8	133458388	3234_23_CCDC80_URB	2	1	TRUE
4	rs2978006	G	A	G	A	0.0694	-0.0238698	0.654981	FALSE	FALSE	FALSE	GCST90277349	0.0178202	0.0902072	7045	8	133521519	NA	NA	NA	NA	NA	NA	NA	0.008464	2.411e-16	35373	chr8	133521519	3234_23_CCDC80_URB	2	1	TRUE
5	rs55714927	T	C	T	C	0.0783	0.0130387	0.298609	FALSE	FALSE	FALSE	GCST90277349	0.0190186	0.24649	7045	17	7169772	TRUE	rs55714927	rs62061425	T	C	G	A	0.010063	7.199e-15	35370	chr17	7176997	3234_23_CCDC80_URB	2	1	TRUE
6	rs6797920	G	A	G	A	0.0573	0.0292833	0.606261	FALSE	FALSE	FALSE	GCST90277349	0.0174019	0.0462103	7045	3	112791263	NA	NA	NA	NA	NA	NA	NA	0.008514	1.698e-11	35362	chr3	112791263	3234_23_CCDC80_URB	2	1	TRUE
7	rs73669307	C	T	C	T	0.1006	-0.00120015	0.0659014	FALSE	FALSE	FALSE	GCST90277349	0.0341828	0.485996	7045	9	127956218	NA	NA	NA	NA	NA	NA	NA	0.012719	2.592e-15	35355	chr9	127956218	3234_23_CCDC80_URB	2	1	TRUE
8	rs767298	TAACTAAT	GAACTAAT	A	C	0.0547	0.0110749	0.641858	TRUE	FALSE	FALSE	GCST90277349	0.0177643	0.266499	7045	7	7234953	NA	NA	NA	NA	NA	NA	NA	0.008255	3.44e-11	35362	chr7	7234953	3234_23_CCDC80_URB	2	1	FALSE
9	rs9845240	A	G	A	G	0.0937	0.00745639	0.32768	FALSE	FALSE	FALSE	GCST90277349	0.0180353	0.339645	7045	3	112655985	NA	NA	NA	NA	NA	NA	NA	0.008481	2.238e-28	35354	chr3	112655985	3234_23_CCDC80_URB	2	1	TRUE
10	rs10935899	G	C	G	C	-0.0538	-0.00559644	0.192925	FALSE	TRUE	TRUE	GCST90277349	0.0215257	0.397436	7045	3	152767339	NA	NA	NA	NA	NA	NA	NA	0.009505	1.513e-08	35350	chr3	152767339	3004_67_PDCD1LG2_PD_L2	2	1	FALSE
11	rs12496730	C	G	C	G	-0.1258	-0.0221647	0.434029	FALSE	TRUE	TRUE	GCST90277349	0.0169825	0.095921	7045	3	98684125	TRUE	rs12496730	rs11927405	C	G	T	C	0.008131	5.34e-54	35330	chr3	98688089	3004_67_PDCD1LG2_PD_L2	2	1	FALSE
12	rs1354034	C	T	C	T	0.047	0.0029806	0.712723	FALSE	FALSE	FALSE	GCST90277349	0.0184901	0.435968	7045	3	56815721	NA	NA	NA	NA	NA	NA	NA	0.008325	1.647e-08	35356	chr3	56815721	3004_67_PDCD1LG2_PD_L2	2	1	TRUE
13	rs17814462	T	G	T	G	0.1488	-0.0366385	0.0307293	FALSE	FALSE	FALSE	GCST90277349	0.0515511	0.238628	7045	9	4598881	NA	NA	NA	NA	NA	NA	NA	0.022151	1.848e-11	35380	chr9	4598881	3004_67_PDCD1LG2_PD_L2	2	1	TRUE
14	rs2146714	TTTC	TTTA	G	T	0.0499	-0.034711	0.388282	TRUE	FALSE	FALSE	GCST90277349	0.0172597	0.0221574	7045	9	5708176	TRUE	rs2146714	rs10975253	C	A	T	C	0.008491	4.18e-09	35367	chr9	5704225	3004_67_PDCD1LG2_PD_L2	2	1	FALSE
15	rs58970962	A	G	A	G	0.3579	-0.00332903	0.216649	FALSE	FALSE	FALSE	GCST90277349	0.0206892	0.436083	7045	9	5509678	NA	NA	NA	NA	NA	NA	NA	0.007938	1e-200	35367	chr9	5509678	3004_67_PDCD1LG2_PD_L2	2	1	TRUE
16	rs62560217	T	C	T	C	0.155	-0.0496647	0.0137763	FALSE	FALSE	FALSE	GCST90277349	0.0744978	0.252495	7045	9	5477636	NA	NA	NA	NA	NA	NA	NA	0.017835	3.603e-18	35366	chr9	5477636	3004_67_PDCD1LG2_PD_L2	2	1	TRUE
17	rs77533513	G	A	G	A	-0.1614	0.0253029	0.0637921	FALSE	FALSE	FALSE	GCST90277349	0.0350629	0.235257	7045	9	5098105	NA	NA	NA	NA	NA	NA	NA	0.02286	1.66e-12	35370	chr9	5098105	3004_67_PDCD1LG2_PD_L2	2	1	TRUE
18	rs8176743	T	C	T	C	0.146	-0.0255621	0.136473	FALSE	FALSE	FALSE	GCST90277349	0.0246613	0.149978	7045	9	133256028	NA	NA	NA	NA	NA	NA	NA	0.01656	1.184e-18	35370	chr9	133256028	3004_67_PDCD1LG2_PD_L2	2	1	TRUE
19	rs9438	C	G	C	G	-0.1411	0.0256763	0.428587	FALSE	TRUE	TRUE	GCST90277349	0.0169601	0.0650226	7045	3	154301098	NA	NA	NA	NA	NA	NA	NA	0.008213	3.679e-66	35346	chr3	154301098	3004_67_PDCD1LG2_PD_L2	2	1	FALSE
20	rs12484700	G	A	G	A	-0.0667	0.00435127	0.191044	FALSE	FALSE	FALSE	GCST90277349	0.021655	0.420374	7045	22	43931393	NA	NA	NA	NA	NA	NA	NA	0.010885	8.915e-10	35372	chr22	43931393	6605_17_IGFALS_IGFALS	2	1	TRUE
21	rs184995649	TTGGC	GTGGC	A	C	-0.2888	-0.00160191	0.0201058	TRUE	FALSE	FALSE	GCST90277349	0.0606643	0.489467	7045	16	3275320	NA	NA	NA	NA	NA	NA	NA	0.029446	1.044e-22	35340	chr16	3275320	6605_17_IGFALS_IGFALS	2	1	FALSE
22	rs1863622	C	T	C	T	0.0789	-0.0367296	0.265273	FALSE	FALSE	FALSE	GCST90277349	0.0189644	0.026387	7045	3	186678827	NA	NA	NA	NA	NA	NA	NA	0.009542	1.357e-16	35368	chr3	186678827	6605_17_IGFALS_IGFALS	2	1	TRUE
23	rs191609731	A	G	A	G	-0.2813	-0.0995197	0.00435235	FALSE	FALSE	FALSE	GCST90277349	0.140663	0.239627	7045	16	1157141	NA	NA	NA	NA	NA	NA	NA	0.031617	5.736e-19	35310	chr16	1157141	6605_17_IGFALS_IGFALS	2	1	TRUE
24	rs2854746	C	G	C	G	0.1601	-0.0276374	0.3648	FALSE	TRUE	TRUE	GCST90277349	0.0177147	0.0593635	7045	7	45921046	NA	NA	NA	NA	NA	NA	NA	0.008692	9.143e-76	35347	chr7	45921046	6605_17_IGFALS_IGFALS	2	1	FALSE
25	rs35391516	A	G	A	G	0.2104	-0.0373301	0.0531018	FALSE	FALSE	FALSE	GCST90277349	0.0380184	0.163076	7045	16	1793815	NA	NA	NA	NA	NA	NA	NA	0.014761	4.26e-46	35321	chr16	1793815	6605_17_IGFALS_IGFALS	2	1	TRUE
26	rs35801822	G	A	G	A	-0.0901	-0.0378028	0.113994	FALSE	FALSE	FALSE	GCST90277349	0.0275727	0.0851839	7045	16	2679949	NA	NA	NA	NA	NA	NA	NA	0.014374	3.649e-10	35318	chr16	2679949	6605_17_IGFALS_IGFALS	2	1	TRUE
27	rs4699726	C	T	C	T	0.0517	-0.0155533	0.574107	FALSE	FALSE	FALSE	GCST90277349	0.0170801	0.181251	7045	4	99178356	NA	NA	NA	NA	NA	NA	NA	0.008219	3.172e-10	35344	chr4	99178356	6605_17_IGFALS_IGFALS	2	1	TRUE
28	rs4786194	T	C	T	C	-0.3137	-0.00270618	0.0176021	FALSE	FALSE	FALSE	GCST90277349	0.0659355	0.483631	7045	16	1503268	NA	NA	NA	NA	NA	NA	NA	0.027127	6.253e-31	35316	chr16	1503268	6605_17_IGFALS_IGFALS	2	1	TRUE
29	rs569213664	T	C	T	C	0.2342	-0.0322233	0.0306138	FALSE	FALSE	FALSE	GCST90277349	0.0509966	0.263735	7045	3	172556442	TRUE	rs569213664	rs574044675	T	C	C	A	0.036037	8.097e-11	35354	chr3	172558731	6605_17_IGFALS_IGFALS	2	1	TRUE
30	rs61754523	T	C	T	C	-0.2312	-0.107138	0.0122104	FALSE	FALSE	FALSE	GCST90277349	0.0816497	0.094732	7045	16	3729593	NA	NA	NA	NA	NA	NA	NA	0.028222	2.564e-16	35353	chr16	3729593	6605_17_IGFALS_IGFALS	2	1	TRUE
31	rs77971956	G	A	G	A	-0.8547	-0.0138411	0.0194296	FALSE	FALSE	FALSE	GCST90277349	0.0632783	0.413429	7045	16	1177272	NA	NA	NA	NA	NA	NA	NA	0.051055	6.61e-63	35312	chr16	1177272	6605_17_IGFALS_IGFALS	2	1	TRUE
	SNP	effect_allele.exposure	other_allele.exposure	effect_allele.outcome	other_allele.outcome	beta.exposure	beta.outcome	eaf.outcome	remove	palindromic	ambiguous	id.outcome	se.outcome	pval.outcome	samplesize.outcome	chr.outcome	pos.outcome	proxy.outcome	target_snp.outcome	proxy_snp.outcome	target_a1.outcome	target_a2.outcome	proxy_a1.outcome	proxy_a2.outcome	se.exposure	pval.exposure	samplesize.exposure	chr.exposure	pos.exposure	exposure	action	SNP_index	mr_keep
1	rs10819325	TTTTTG	TTTTTC	C	G	-0.0681	-0.0239751	0.938897	TRUE	FALSE	FALSE	GCST90277381	0.0397422	0.273166	5463	9	127986347	TRUE	rs10819325	rs7859847	G	C	A	G	0.011745	6.694e-09	35351	chr9	127984543	3234_23_CCDC80_URB	2	1	FALSE
2	rs143501783	C	T	C	T	0.2418	-0.202916	0.0025504	FALSE	FALSE	FALSE	GCST90277381	0.19314	0.146717	5463	17	7897001	NA	NA	NA	NA	NA	NA	NA	0.037171	7.77e-11	35373	chr17	7897001	3234_23_CCDC80_URB	2	1	TRUE
3	rs2142306	C	T	C	T	0.0939	0.00928619	0.369621	FALSE	FALSE	FALSE	GCST90277381	0.0201876	0.32276	5463	8	133458388	NA	NA	NA	NA	NA	NA	NA	0.008224	3.392e-30	35374	chr8	133458388	3234_23_CCDC80_URB	2	1	TRUE
4	rs2978006	G	A	G	A	0.0694	-0.0239671	0.654981	FALSE	FALSE	FALSE	GCST90277381	0.0202392	0.118169	5463	8	133521519	NA	NA	NA	NA	NA	NA	NA	0.008464	2.411e-16	35373	chr8	133521519	3234_23_CCDC80_URB	2	1	TRUE
5	rs55714927	T	C	T	C	0.0783	-0.0368153	0.298609	FALSE	FALSE	FALSE	GCST90277381	0.0215039	0.0434457	5463	17	7169772	TRUE	rs55714927	rs62061425	T	C	G	A	0.010063	7.199e-15	35370	chr17	7176997	3234_23_CCDC80_URB	2	1	TRUE
6	rs6797920	G	A	G	A	0.0573	0.0111574	0.606261	FALSE	FALSE	FALSE	GCST90277381	0.0198091	0.286634	5463	3	112791263	NA	NA	NA	NA	NA	NA	NA	0.008514	1.698e-11	35362	chr3	112791263	3234_23_CCDC80_URB	2	1	TRUE
7	rs73669307	C	T	C	T	0.1006	0.0675017	0.0659014	FALSE	FALSE	FALSE	GCST90277381	0.0389456	0.0415274	5463	9	127956218	NA	NA	NA	NA	NA	NA	NA	0.012719	2.592e-15	35355	chr9	127956218	3234_23_CCDC80_URB	2	1	TRUE
8	rs767298	TAACTAAT	GAACTAAT	A	C	0.0547	0.0163942	0.641858	TRUE	FALSE	FALSE	GCST90277381	0.0201186	0.207571	5463	7	7234953	NA	NA	NA	NA	NA	NA	NA	0.008255	3.44e-11	35362	chr7	7234953	3234_23_CCDC80_URB	2	1	FALSE
9	rs9845240	A	G	A	G	0.0937	-0.00358984	0.32768	FALSE	FALSE	FALSE	GCST90277381	0.0204503	0.430328	5463	3	112655985	NA	NA	NA	NA	NA	NA	NA	0.008481	2.238e-28	35354	chr3	112655985	3234_23_CCDC80_URB	2	1	TRUE
10	rs10935899	G	C	G	C	-0.0538	-0.00412142	0.192925	FALSE	TRUE	TRUE	GCST90277381	0.024801	0.434008	5463	3	152767339	NA	NA	NA	NA	NA	NA	NA	0.009505	1.513e-08	35350	chr3	152767339	3004_67_PDCD1LG2_PD_L2	2	1	FALSE
11	rs12496730	C	G	C	G	-0.1258	-0.0218022	0.434029	FALSE	TRUE	TRUE	GCST90277381	0.0193336	0.129727	5463	3	98684125	TRUE	rs12496730	rs11927405	C	G	T	C	0.008131	5.34e-54	35330	chr3	98688089	3004_67_PDCD1LG2_PD_L2	2	1	FALSE
12	rs1354034	C	T	C	T	0.047	0.00703676	0.712723	FALSE	FALSE	FALSE	GCST90277381	0.0209247	0.368326	5463	3	56815721	NA	NA	NA	NA	NA	NA	NA	0.008325	1.647e-08	35356	chr3	56815721	3004_67_PDCD1LG2_PD_L2	2	1	TRUE
13	rs17814462	T	G	T	G	0.1488	-0.0159199	0.0307293	FALSE	FALSE	FALSE	GCST90277381	0.0581069	0.392052	5463	9	4598881	NA	NA	NA	NA	NA	NA	NA	0.022151	1.848e-11	35380	chr9	4598881	3004_67_PDCD1LG2_PD_L2	2	1	TRUE
14	rs2146714	TTTC	TTTA	G	T	0.0499	-0.0251671	0.388282	TRUE	FALSE	FALSE	GCST90277381	0.0193856	0.097103	5463	9	5708176	TRUE	rs2146714	rs10975253	C	A	T	C	0.008491	4.18e-09	35367	chr9	5704225	3004_67_PDCD1LG2_PD_L2	2	1	FALSE
15	rs58970962	A	G	A	G	0.3579	0.00627238	0.216649	FALSE	FALSE	FALSE	GCST90277381	0.0233552	0.394132	5463	9	5509678	NA	NA	NA	NA	NA	NA	NA	0.007938	1e-200	35367	chr9	5509678	3004_67_PDCD1LG2_PD_L2	2	1	TRUE
16	rs62560217	T	C	T	C	0.155	0.0692384	0.0137763	FALSE	FALSE	FALSE	GCST90277381	0.0852891	0.208451	5463	9	5477636	NA	NA	NA	NA	NA	NA	NA	0.017835	3.603e-18	35366	chr9	5477636	3004_67_PDCD1LG2_PD_L2	2	1	TRUE
17	rs77533513	G	A	G	A	-0.1614	0.056499	0.0637921	FALSE	FALSE	FALSE	GCST90277381	0.039663	0.0771543	5463	9	5098105	NA	NA	NA	NA	NA	NA	NA	0.02286	1.66e-12	35370	chr9	5098105	3004_67_PDCD1LG2_PD_L2	2	1	TRUE
18	rs8176743	T	C	T	C	0.146	0.0636506	0.136473	FALSE	FALSE	FALSE	GCST90277381	0.0275603	0.0104578	5463	9	133256028	NA	NA	NA	NA	NA	NA	NA	0.01656	1.184e-18	35370	chr9	133256028	3004_67_PDCD1LG2_PD_L2	2	1	TRUE
19	rs9438	C	G	C	G	-0.1411	0.0114635	0.428587	FALSE	TRUE	TRUE	GCST90277381	0.019271	0.275969	5463	3	154301098	NA	NA	NA	NA	NA	NA	NA	0.008213	3.679e-66	35346	chr3	154301098	3004_67_PDCD1LG2_PD_L2	2	1	FALSE
20	rs12484700	G	A	G	A	-0.0667	-0.0396221	0.191044	FALSE	FALSE	FALSE	GCST90277381	0.0245285	0.0531175	5463	22	43931393	NA	NA	NA	NA	NA	NA	NA	0.010885	8.915e-10	35372	chr22	43931393	6605_17_IGFALS_IGFALS	2	1	TRUE
21	rs184995649	TTGGC	GTGGC	A	C	-0.2888	0.0740085	0.0201058	TRUE	FALSE	FALSE	GCST90277381	0.0692093	0.142458	5463	16	3275320	NA	NA	NA	NA	NA	NA	NA	0.029446	1.044e-22	35340	chr16	3275320	6605_17_IGFALS_IGFALS	2	1	FALSE
22	rs1863622	C	T	C	T	0.0789	-0.0161826	0.265273	FALSE	FALSE	FALSE	GCST90277381	0.0213879	0.224638	5463	3	186678827	NA	NA	NA	NA	NA	NA	NA	0.009542	1.357e-16	35368	chr3	186678827	6605_17_IGFALS_IGFALS	2	1	TRUE
23	rs191609731	A	G	A	G	-0.2813	-0.112248	0.00435235	FALSE	FALSE	FALSE	GCST90277381	0.152406	0.230711	5463	16	1157141	NA	NA	NA	NA	NA	NA	NA	0.031617	5.736e-19	35310	chr16	1157141	6605_17_IGFALS_IGFALS	2	1	TRUE
24	rs2854746	C	G	C	G	0.1601	0.0281963	0.3648	FALSE	TRUE	TRUE	GCST90277381	0.020086	0.0801924	5463	7	45921046	NA	NA	NA	NA	NA	NA	NA	0.008692	9.143e-76	35347	chr7	45921046	6605_17_IGFALS_IGFALS	2	1	FALSE
25	rs35391516	A	G	A	G	0.2104	0.0608233	0.0531018	FALSE	FALSE	FALSE	GCST90277381	0.0435471	0.0812482	5463	16	1793815	NA	NA	NA	NA	NA	NA	NA	0.014761	4.26e-46	35321	chr16	1793815	6605_17_IGFALS_IGFALS	2	1	TRUE
26	rs35801822	G	A	G	A	-0.0901	0.0251997	0.113994	FALSE	FALSE	FALSE	GCST90277381	0.0311835	0.209514	5463	16	2679949	NA	NA	NA	NA	NA	NA	NA	0.014374	3.649e-10	35318	chr16	2679949	6605_17_IGFALS_IGFALS	2	1	TRUE
27	rs4699726	C	T	C	T	0.0517	-0.022148	0.574107	FALSE	FALSE	FALSE	GCST90277381	0.0193378	0.126038	5463	4	99178356	NA	NA	NA	NA	NA	NA	NA	0.008219	3.172e-10	35344	chr4	99178356	6605_17_IGFALS_IGFALS	2	1	TRUE
28	rs4786194	T	C	T	C	-0.3137	0.00706466	0.0176021	FALSE	FALSE	FALSE	GCST90277381	0.0737682	0.461852	5463	16	1503268	NA	NA	NA	NA	NA	NA	NA	0.027127	6.253e-31	35316	chr16	1503268	6605_17_IGFALS_IGFALS	2	1	TRUE
29	rs569213664	T	C	T	C	0.2342	-0.00803575	0.0306138	FALSE	FALSE	FALSE	GCST90277381	0.0569668	0.443911	5463	3	172556442	TRUE	rs569213664	rs574044675	T	C	C	A	0.036037	8.097e-11	35354	chr3	172558731	6605_17_IGFALS_IGFALS	2	1	TRUE
30	rs61754523	T	C	T	C	-0.2312	0.0518304	0.0122104	FALSE	FALSE	FALSE	GCST90277381	0.0928439	0.288336	5463	16	3729593	NA	NA	NA	NA	NA	NA	NA	0.028222	2.564e-16	35353	chr16	3729593	6605_17_IGFALS_IGFALS	2	1	TRUE
31	rs77971956	G	A	G	A	-0.8547	0.0918305	0.0194296	FALSE	FALSE	FALSE	GCST90277381	0.0726424	0.103089	5463	16	1177272	NA	NA	NA	NA	NA	NA	NA	0.051055	6.61e-63	35312	chr16	1177272	6605_17_IGFALS_IGFALS	2	1	TRUE
	SNP	effect_allele.exposure	other_allele.exposure	effect_allele.outcome	other_allele.outcome	beta.exposure	beta.outcome	eaf.outcome	remove	palindromic	ambiguous	id.outcome	se.outcome	pval.outcome	samplesize.outcome	chr.outcome	pos.outcome	proxy.outcome	target_snp.outcome	proxy_snp.outcome	target_a1.outcome	target_a2.outcome	proxy_a1.outcome	proxy_a2.outcome	se.exposure	pval.exposure	samplesize.exposure	chr.exposure	pos.exposure	exposure	action	SNP_index	mr_keep
1	rs10819325	TTTTTG	TTTTTC	C	G	-0.0681	-0.0120503	0.938897	TRUE	FALSE	FALSE	GCST90277413	0.0347487	0.364377	7148	9	127986347	TRUE	rs10819325	rs7859847	G	C	A	G	0.011745	6.694e-09	35351	chr9	127984543	3234_23_CCDC80_URB	2	1	FALSE
2	rs143501783	C	T	C	T	0.2418	-0.140568	0.0025504	FALSE	FALSE	FALSE	GCST90277413	0.16896	0.202716	7148	17	7897001	NA	NA	NA	NA	NA	NA	NA	0.037171	7.77e-11	35373	chr17	7897001	3234_23_CCDC80_URB	2	1	TRUE
3	rs2142306	C	T	C	T	0.0939	-0.033814	0.369621	FALSE	FALSE	FALSE	GCST90277413	0.0176414	0.0276354	7148	8	133458388	NA	NA	NA	NA	NA	NA	NA	0.008224	3.392e-30	35374	chr8	133458388	3234_23_CCDC80_URB	2	1	TRUE
4	rs2978006	G	A	G	A	0.0694	-0.0120221	0.654981	FALSE	FALSE	FALSE	GCST90277413	0.0176909	0.24839	7148	8	133521519	NA	NA	NA	NA	NA	NA	NA	0.008464	2.411e-16	35373	chr8	133521519	3234_23_CCDC80_URB	2	1	TRUE
5	rs55714927	T	C	T	C	0.0783	-0.0189389	0.298609	FALSE	FALSE	FALSE	GCST90277413	0.0188644	0.157702	7148	17	7169772	TRUE	rs55714927	rs62061425	T	C	G	A	0.010063	7.199e-15	35370	chr17	7176997	3234_23_CCDC80_URB	2	1	TRUE
6	rs6797920	G	A	G	A	0.0573	0.0302143	0.606261	FALSE	FALSE	FALSE	GCST90277413	0.0172922	0.0402945	7148	3	112791263	NA	NA	NA	NA	NA	NA	NA	0.008514	1.698e-11	35362	chr3	112791263	3234_23_CCDC80_URB	2	1	TRUE
7	rs73669307	C	T	C	T	0.1006	0.0389271	0.0659014	FALSE	FALSE	FALSE	GCST90277413	0.0340287	0.126322	7148	9	127956218	NA	NA	NA	NA	NA	NA	NA	0.012719	2.592e-15	35355	chr9	127956218	3234_23_CCDC80_URB	2	1	TRUE
8	rs767298	TAACTAAT	GAACTAAT	A	C	0.0547	-0.0188182	0.641858	TRUE	FALSE	FALSE	GCST90277413	0.0175928	0.142388	7148	7	7234953	NA	NA	NA	NA	NA	NA	NA	0.008255	3.44e-11	35362	chr7	7234953	3234_23_CCDC80_URB	2	1	FALSE
9	rs9845240	A	G	A	G	0.0937	-0.000592764	0.32768	FALSE	FALSE	FALSE	GCST90277413	0.0179117	0.4868	7148	3	112655985	NA	NA	NA	NA	NA	NA	NA	0.008481	2.238e-28	35354	chr3	112655985	3234_23_CCDC80_URB	2	1	TRUE
10	rs10935899	G	C	G	C	-0.0538	-0.0293006	0.192925	FALSE	TRUE	TRUE	GCST90277413	0.0213583	0.0850535	7148	3	152767339	NA	NA	NA	NA	NA	NA	NA	0.009505	1.513e-08	35350	chr3	152767339	3004_67_PDCD1LG2_PD_L2	2	1	FALSE
11	rs12496730	C	G	C	G	-0.1258	0.0291157	0.434029	FALSE	TRUE	TRUE	GCST90277413	0.0168498	0.0419981	7148	3	98684125	TRUE	rs12496730	rs11927405	C	G	T	C	0.008131	5.34e-54	35330	chr3	98688089	3004_67_PDCD1LG2_PD_L2	2	1	FALSE
12	rs1354034	C	T	C	T	0.047	0.0393821	0.712723	FALSE	FALSE	FALSE	GCST90277413	0.0182745	0.0155797	7148	3	56815721	NA	NA	NA	NA	NA	NA	NA	0.008325	1.647e-08	35356	chr3	56815721	3004_67_PDCD1LG2_PD_L2	2	1	TRUE
13	rs17814462	T	G	T	G	0.1488	0.0325064	0.0307293	FALSE	FALSE	FALSE	GCST90277413	0.0513248	0.263254	7148	9	4598881	NA	NA	NA	NA	NA	NA	NA	0.022151	1.848e-11	35380	chr9	4598881	3004_67_PDCD1LG2_PD_L2	2	1	TRUE
14	rs2146714	TTTC	TTTA	G	T	0.0499	-0.014532	0.388282	TRUE	FALSE	FALSE	GCST90277413	0.017111	0.197863	7148	9	5708176	TRUE	rs2146714	rs10975253	C	A	T	C	0.008491	4.18e-09	35367	chr9	5704225	3004_67_PDCD1LG2_PD_L2	2	1	FALSE
15	rs58970962	A	G	A	G	0.3579	0.00756526	0.216649	FALSE	FALSE	FALSE	GCST90277413	0.0205174	0.356167	7148	9	5509678	NA	NA	NA	NA	NA	NA	NA	0.007938	1e-200	35367	chr9	5509678	3004_67_PDCD1LG2_PD_L2	2	1	TRUE
16	rs62560217	T	C	T	C	0.155	-0.0888771	0.0137763	FALSE	FALSE	FALSE	GCST90277413	0.0737876	0.114198	7148	9	5477636	NA	NA	NA	NA	NA	NA	NA	0.017835	3.603e-18	35366	chr9	5477636	3004_67_PDCD1LG2_PD_L2	2	1	TRUE
17	rs77533513	G	A	G	A	-0.1614	0.0246188	0.0637921	FALSE	FALSE	FALSE	GCST90277413	0.0347452	0.239301	7148	9	5098105	NA	NA	NA	NA	NA	NA	NA	0.02286	1.66e-12	35370	chr9	5098105	3004_67_PDCD1LG2_PD_L2	2	1	TRUE
18	rs8176743	T	C	T	C	0.146	0.00397092	0.136473	FALSE	FALSE	FALSE	GCST90277413	0.024452	0.435497	7148	9	133256028	NA	NA	NA	NA	NA	NA	NA	0.01656	1.184e-18	35370	chr9	133256028	3004_67_PDCD1LG2_PD_L2	2	1	TRUE
19	rs9438	C	G	C	G	-0.1411	0.00419949	0.428587	FALSE	TRUE	TRUE	GCST90277413	0.0168269	0.40146	7148	3	154301098	NA	NA	NA	NA	NA	NA	NA	0.008213	3.679e-66	35346	chr3	154301098	3004_67_PDCD1LG2_PD_L2	2	1	FALSE
20	rs184995649	TTGGC	GTGGC	A	C	-0.2888	0.0571631	0.0201058	TRUE	FALSE	FALSE	GCST90277413	0.0605767	0.172675	7148	16	3275320	NA	NA	NA	NA	NA	NA	NA	0.029446	1.044e-22	35340	chr16	3275320	6605_17_IGFALS_IGFALS	2	1	FALSE
21	rs1863622	C	T	C	T	0.0789	0.0248661	0.265273	FALSE	FALSE	FALSE	GCST90277413	0.0188253	0.0932695	7148	3	186678827	NA	NA	NA	NA	NA	NA	NA	0.009542	1.357e-16	35368	chr3	186678827	6605_17_IGFALS_IGFALS	2	1	TRUE
22	rs191609731	A	G	A	G	-0.2813	0.115878	0.00435235	FALSE	FALSE	FALSE	GCST90277413	0.140435	0.204647	7148	16	1157141	NA	NA	NA	NA	NA	NA	NA	0.031617	5.736e-19	35310	chr16	1157141	6605_17_IGFALS_IGFALS	2	1	TRUE
23	rs2854746	C	G	C	G	0.1601	0.0147139	0.3648	FALSE	TRUE	TRUE	GCST90277413	0.0176077	0.201676	7148	7	45921046	NA	NA	NA	NA	NA	NA	NA	0.008692	9.143e-76	35347	chr7	45921046	6605_17_IGFALS_IGFALS	2	1	FALSE
24	rs35391516	A	G	A	G	0.2104	-0.02074	0.0531018	FALSE	FALSE	FALSE	GCST90277413	0.0378003	0.291615	7148	16	1793815	NA	NA	NA	NA	NA	NA	NA	0.014761	4.26e-46	35321	chr16	1793815	6605_17_IGFALS_IGFALS	2	1	TRUE
25	rs35801822	G	A	G	A	-0.0901	-0.000152957	0.113994	FALSE	FALSE	FALSE	GCST90277413	0.0273304	0.497767	7148	16	2679949	NA	NA	NA	NA	NA	NA	NA	0.014374	3.649e-10	35318	chr16	2679949	6605_17_IGFALS_IGFALS	2	1	TRUE
26	rs4699726	C	T	C	T	0.0517	0.00435069	0.574107	FALSE	FALSE	FALSE	GCST90277413	0.01695	0.398714	7148	4	99178356	NA	NA	NA	NA	NA	NA	NA	0.008219	3.172e-10	35344	chr4	99178356	6605_17_IGFALS_IGFALS	2	1	TRUE
27	rs4786194	T	C	T	C	-0.3137	0.0496145	0.0176021	FALSE	FALSE	FALSE	GCST90277413	0.0652089	0.223372	7148	16	1503268	NA	NA	NA	NA	NA	NA	NA	0.027127	6.253e-31	35316	chr16	1503268	6605_17_IGFALS_IGFALS	2	1	TRUE
28	rs569213664	T	C	T	C	0.2342	0.0322128	0.0306138	FALSE	FALSE	FALSE	GCST90277413	0.0503872	0.261312	7148	3	172556442	TRUE	rs569213664	rs574044675	T	C	C	A	0.036037	8.097e-11	35354	chr3	172558731	6605_17_IGFALS_IGFALS	2	1	TRUE
29	rs61754523	T	C	T	C	-0.2312	-0.0428857	0.0122104	FALSE	FALSE	FALSE	GCST90277413	0.0807381	0.29765	7148	16	3729593	NA	NA	NA	NA	NA	NA	NA	0.028222	2.564e-16	35353	chr16	3729593	6605_17_IGFALS_IGFALS	2	1	TRUE
30	rs77971956	G	A	G	A	-0.8547	0.160057	0.0194296	FALSE	FALSE	FALSE	GCST90277413	0.0625758	0.00526668	7148	16	1177272	NA	NA	NA	NA	NA	NA	NA	0.051055	6.61e-63	35312	chr16	1177272	6605_17_IGFALS_IGFALS	2	1	TRUE

## Sheet: Sheet7
The MR results between proteins and lipid species
id.exposure	id.outcome	method	nsnp	b	se_mr	pval_mr	lo_ci	up_ci	or	or_lci95	or_uci95	egger_intercept	se_pleio	pval_pleio	Q_MR_Egger	Q_df_MR_Egger	Q_pval_MR_Egger	Q_ivw	Q_df_ivw	Q_pval_ivw
3004_67_PDCD1LG2_PD_L2	GCST90277238	Inverse variance weighted	6	0.0548056	0.0512071	0.284496	-0.0455604	0.155172	1.05634	0.955462	1.16786	-0.0165521	0.0185971	0.42374	1.43262	4	0.838505	2.22479	5	0.817248
3004_67_PDCD1LG2_PD_L2	GCST90277238	Weighted median	6	0.084104	0.0536301	0.116829	-0.0210109	0.189219	1.08774	0.979208	1.20831	-0.0165521	0.0185971	0.42374	1.43262	4	0.838505	2.22479	5	0.817248
3004_67_PDCD1LG2_PD_L2	GCST90277238	Maximum likelihood	6	0.0548733	0.0512895	0.284675	-0.045654	0.155401	1.05641	0.955372	1.16813	-0.0165521	0.0185971	0.42374	1.43262	4	0.838505	2.22479	5	0.817248
3004_67_PDCD1LG2_PD_L2	GCST90277238	MR Egger	6	0.118	0.087541	0.248957	-0.0535806	0.28958	1.12524	0.94783	1.33587	-0.0165521	0.0185971	0.42374	1.43262	4	0.838505	2.22479	5	0.817248
3234_23_CCDC80_URB	GCST90277238	Inverse variance weighted	7	-0.236258	0.111074	0.0334179	-0.453963	-0.0185523	0.789577	0.635106	0.981619	0.00124129	0.0486117	0.980616	8.17924	5	0.14663	8.18031	6	0.225189
3234_23_CCDC80_URB	GCST90277238	Weighted median	7	-0.144558	0.122385	0.237532	-0.384432	0.0953161	0.865405	0.680837	1.10001	0.00124129	0.0486117	0.980616	8.17924	5	0.14663	8.18031	6	0.225189
3234_23_CCDC80_URB	GCST90277238	Maximum likelihood	7	-0.239096	0.0965104	0.0132338	-0.428257	-0.049936	0.787339	0.651644	0.95129	0.00124129	0.0486117	0.980616	8.17924	5	0.14663	8.18031	6	0.225189
3234_23_CCDC80_URB	GCST90277238	MR Egger	7	-0.251172	0.596626	0.691247	-1.42056	0.918214	0.777888	0.241579	2.50481	0.00124129	0.0486117	0.980616	8.17924	5	0.14663	8.18031	6	0.225189
6605_17_IGFALS_IGFALS	GCST90277238	Inverse variance weighted	10	0.0511173	0.0699867	0.465154	-0.0860565	0.188291	1.05245	0.917542	1.20718	0.014634	0.0153358	0.367902	12.7412	8	0.12107	14.1914	9	0.115677
6605_17_IGFALS_IGFALS	GCST90277238	Weighted median	10	0.0103417	0.069161	0.881134	-0.125214	0.145897	1.0104	0.882308	1.15708	0.014634	0.0153358	0.367902	12.7412	8	0.12107	14.1914	9	0.115677
6605_17_IGFALS_IGFALS	GCST90277238	Maximum likelihood	10	0.0522852	0.0561975	0.352173	-0.0578619	0.162432	1.05368	0.94378	1.17637	0.014634	0.0153358	0.367902	12.7412	8	0.12107	14.1914	9	0.115677
6605_17_IGFALS_IGFALS	GCST90277238	MR Egger	10	-0.00582141	0.0922372	0.951225	-0.186606	0.174963	0.994195	0.82977	1.1912	0.014634	0.0153358	0.367902	12.7412	8	0.12107	14.1914	9	0.115677
id.exposure	id.outcome	method	nsnp	b	se_mr	pval_mr	lo_ci	up_ci	or	or_lci95	or_uci95	egger_intercept	se_pleio	pval_pleio	Q_MR_Egger	Q_df_MR_Egger	Q_pval_MR_Egger	Q_ivw	Q_df_ivw	Q_pval_ivw
3004_67_PDCD1LG2_PD_L2	GCST90277242	Inverse variance weighted	6	0.0132255	0.0728297	0.855901	-0.129521	0.155972	1.01331	0.878516	1.16879	-0.0334196	0.0243775	0.242288	6.73926	4	0.150326	9.90572	5	0.077951
3004_67_PDCD1LG2_PD_L2	GCST90277242	Weighted median	6	0.0606561	0.0570481	0.28767	-0.0511581	0.17247	1.06253	0.950128	1.18824	-0.0334196	0.0243775	0.242288	6.73926	4	0.150326	9.90572	5	0.077951
3004_67_PDCD1LG2_PD_L2	GCST90277242	Maximum likelihood	6	0.0133324	0.0520017	0.797654	-0.0885908	0.115256	1.01342	0.91522	1.12216	-0.0334196	0.0243775	0.242288	6.73926	4	0.150326	9.90572	5	0.077951
3004_67_PDCD1LG2_PD_L2	GCST90277242	MR Egger	6	0.140943	0.114848	0.287029	-0.0841583	0.366044	1.15136	0.919286	1.44202	-0.0334196	0.0243775	0.242288	6.73926	4	0.150326	9.90572	5	0.077951
3234_23_CCDC80_URB	GCST90277242	Inverse variance weighted	7	-0.138838	0.0960004	0.148115	-0.326999	0.049323	0.870369	0.721085	1.05056	0.00413749	0.0393117	0.920271	5.27215	5	0.383578	5.28383	6	0.507959
3234_23_CCDC80_URB	GCST90277242	Weighted median	7	-0.230368	0.126428	0.068436	-0.478167	0.0174312	0.794242	0.619919	1.01758	0.00413749	0.0393117	0.920271	5.27215	5	0.383578	5.28383	6	0.507959
3234_23_CCDC80_URB	GCST90277242	Maximum likelihood	7	-0.140291	0.096798	0.14725	-0.330015	0.0494332	0.869106	0.718913	1.05068	0.00413749	0.0393117	0.920271	5.27215	5	0.383578	5.28383	6	0.507959
3234_23_CCDC80_URB	GCST90277242	MR Egger	7	-0.18855	0.482508	0.712062	-1.13427	0.757165	0.828159	0.321658	2.13222	0.00413749	0.0393117	0.920271	5.27215	5	0.383578	5.28383	6	0.507959
6605_17_IGFALS_IGFALS	GCST90277242	Inverse variance weighted	10	-0.0331366	0.0566998	0.558936	-0.144268	0.077995	0.967406	0.865656	1.08112	0.0236111	0.0123046	0.091273	3.45642	8	0.902546	7.13852	9	0.6227
6605_17_IGFALS_IGFALS	GCST90277242	Weighted median	10	-0.11902	0.0695213	0.0868983	-0.255282	0.0172419	0.88779	0.774698	1.01739	0.0236111	0.0123046	0.091273	3.45642	8	0.902546	7.13852	9	0.6227
6605_17_IGFALS_IGFALS	GCST90277242	Maximum likelihood	10	-0.0326863	0.0569098	0.565729	-0.14423	0.078857	0.967842	0.865689	1.08205	0.0236111	0.0123046	0.091273	3.45642	8	0.902546	7.13852	9	0.6227
6605_17_IGFALS_IGFALS	GCST90277242	MR Egger	10	-0.125873	0.0745016	0.129589	-0.271896	0.0201504	0.881727	0.761934	1.02035	0.0236111	0.0123046	0.091273	3.45642	8	0.902546	7.13852	9	0.6227
id.exposure	id.outcome	method	nsnp	b	se_mr	pval_mr	lo_ci	up_ci	or	or_lci95	or_uci95	egger_intercept	se_pleio	pval_pleio	Q_MR_Egger	Q_df_MR_Egger	Q_pval_MR_Egger	Q_ivw	Q_df_ivw	Q_pval_ivw
3004_67_PDCD1LG2_PD_L2	GCST90277244	Inverse variance weighted	6	0.0942978	0.0610998	0.122748	-0.0254578	0.214053	1.09889	0.974863	1.23869	-0.0272544	0.0207658	0.259605	4.97601	4	0.289768	7.11889	5	0.211948
3004_67_PDCD1LG2_PD_L2	GCST90277244	Weighted median	6	0.107011	0.0548777	0.0511778	-0.000549535	0.214571	1.11295	0.999451	1.23933	-0.0272544	0.0207658	0.259605	4.97601	4	0.289768	7.11889	5	0.211948
3004_67_PDCD1LG2_PD_L2	GCST90277244	Maximum likelihood	6	0.0949811	0.0514628	0.0649467	-0.00588605	0.195848	1.09964	0.994131	1.21634	-0.0272544	0.0207658	0.259605	4.97601	4	0.289768	7.11889	5	0.211948
3004_67_PDCD1LG2_PD_L2	GCST90277244	MR Egger	6	0.198299	0.097678	0.112196	0.00685047	0.389748	1.21933	1.00687	1.47661	-0.0272544	0.0207658	0.259605	4.97601	4	0.289768	7.11889	5	0.211948
3234_23_CCDC80_URB	GCST90277244	Inverse variance weighted	7	-0.146097	0.0951794	0.124793	-0.332648	0.0404546	0.864074	0.717022	1.04128	-0.0434157	0.0380258	0.305273	3.76838	5	0.583221	5.07197	6	0.534617
3234_23_CCDC80_URB	GCST90277244	Weighted median	7	-0.0619597	0.119393	0.603791	-0.295969	0.17205	0.939921	0.74381	1.18774	-0.0434157	0.0380258	0.305273	3.76838	5	0.583221	5.07197	6	0.534617
3234_23_CCDC80_URB	GCST90277244	Maximum likelihood	7	-0.14764	0.0959419	0.123842	-0.335686	0.0404062	0.862742	0.714847	1.04123	-0.0434157	0.0380258	0.305273	3.76838	5	0.583221	5.07197	6	0.534617
3234_23_CCDC80_URB	GCST90277244	MR Egger	7	0.375564	0.466706	0.457527	-0.539181	1.29031	1.45581	0.583226	3.6339	-0.0434157	0.0380258	0.305273	3.76838	5	0.583221	5.07197	6	0.534617
6605_17_IGFALS_IGFALS	GCST90277244	Inverse variance weighted	10	-0.0305086	0.0557697	0.584347	-0.139817	0.0788	0.969952	0.869517	1.08199	0.011136	0.0121613	0.3866	3.89206	8	0.866728	4.73054	9	0.857137
6605_17_IGFALS_IGFALS	GCST90277244	Weighted median	10	-0.075592	0.0668029	0.257816	-0.206526	0.0553417	0.927194	0.813405	1.0569	0.011136	0.0121613	0.3866	3.89206	8	0.866728	4.73054	9	0.857137
6605_17_IGFALS_IGFALS	GCST90277244	Maximum likelihood	10	-0.030216	0.0558581	0.588547	-0.139698	0.0792659	0.970236	0.869621	1.08249	0.011136	0.0121613	0.3866	3.89206	8	0.866728	4.73054	9	0.857137
6605_17_IGFALS_IGFALS	GCST90277244	MR Egger	10	-0.0738309	0.0731342	0.342278	-0.217174	0.0695122	0.928829	0.80479	1.07199	0.011136	0.0121613	0.3866	3.89206	8	0.866728	4.73054	9	0.857137
id.exposure	id.outcome	method	nsnp	b	se_mr	pval_mr	lo_ci	up_ci	or	or_lci95	or_uci95	egger_intercept	se_pleio	pval_pleio	Q_MR_Egger	Q_df_MR_Egger	Q_pval_MR_Egger	Q_ivw	Q_df_ivw	Q_pval_ivw
3004_67_PDCD1LG2_PD_L2	GCST90277255	Inverse variance weighted	6	0.0553868	0.0820847	0.499833	-0.105499	0.216273	1.05695	0.899875	1.24144	-0.0181693	0.0320673	0.601268	11.95	4	0.0177266	12.9091	5	0.0242453
3004_67_PDCD1LG2_PD_L2	GCST90277255	Weighted median	6	0.0682635	0.0543509	0.209124	-0.0382642	0.174791	1.07065	0.962459	1.191	-0.0181693	0.0320673	0.601268	11.95	4	0.0177266	12.9091	5	0.0242453
3004_67_PDCD1LG2_PD_L2	GCST90277255	Maximum likelihood	6	0.0560969	0.0513526	0.274663	-0.0445542	0.156748	1.0577	0.956424	1.1697	-0.0181693	0.0320673	0.601268	11.95	4	0.0177266	12.9091	5	0.0242453
3004_67_PDCD1LG2_PD_L2	GCST90277255	MR Egger	6	0.124742	0.15093	0.454977	-0.171081	0.420565	1.13286	0.842753	1.52282	-0.0181693	0.0320673	0.601268	11.95	4	0.0177266	12.9091	5	0.0242453
3234_23_CCDC80_URB	GCST90277255	Inverse variance weighted	7	-0.0388888	0.103182	0.706251	-0.241125	0.163348	0.961858	0.785743	1.17745	0.0385583	0.041735	0.397941	6.05902	5	0.300518	7.09338	6	0.312298
3234_23_CCDC80_URB	GCST90277255	Weighted median	7	0.00110878	0.12335	0.992828	-0.240657	0.242875	1.00111	0.786111	1.27491	0.0385583	0.041735	0.397941	6.05902	5	0.300518	7.09338	6	0.312298
3234_23_CCDC80_URB	GCST90277255	Maximum likelihood	7	-0.038811	0.0954806	0.68439	-0.225953	0.148331	0.961933	0.797756	1.1599	0.0385583	0.041735	0.397941	6.05902	5	0.300518	7.09338	6	0.312298
3234_23_CCDC80_URB	GCST90277255	MR Egger	7	-0.502168	0.512212	0.371918	-1.5061	0.501768	0.605217	0.221772	1.65164	0.0385583	0.041735	0.397941	6.05902	5	0.300518	7.09338	6	0.312298
6605_17_IGFALS_IGFALS	GCST90277255	Inverse variance weighted	10	0.0166727	0.0555971	0.764265	-0.0922975	0.125643	1.01681	0.911834	1.13388	0.00316859	0.0121234	0.800416	7.25291	8	0.509608	7.32122	9	0.603714
6605_17_IGFALS_IGFALS	GCST90277255	Weighted median	10	0.0224042	0.0669928	0.738057	-0.108902	0.15371	1.02266	0.896819	1.16615	0.00316859	0.0121234	0.800416	7.25291	8	0.509608	7.32122	9	0.603714
6605_17_IGFALS_IGFALS	GCST90277255	Maximum likelihood	10	0.0167919	0.0557297	0.763179	-0.0924383	0.126022	1.01693	0.911705	1.13431	0.00316859	0.0121234	0.800416	7.25291	8	0.509608	7.32122	9	0.603714
6605_17_IGFALS_IGFALS	GCST90277255	MR Egger	10	0.00434793	0.0729021	0.953905	-0.13854	0.147236	1.00436	0.870628	1.15863	0.00316859	0.0121234	0.800416	7.25291	8	0.509608	7.32122	9	0.603714
id.exposure	id.outcome	method	nsnp	b	se_mr	pval_mr	lo_ci	up_ci	or	or_lci95	or_uci95	egger_intercept	se_pleio	pval_pleio	Q_MR_Egger	Q_df_MR_Egger	Q_pval_MR_Egger	Q_ivw	Q_df_ivw	Q_pval_ivw
3004_67_PDCD1LG2_PD_L2	GCST90277260	Inverse variance weighted	6	0.0681132	0.0628053	0.278137	-0.0549851	0.191212	1.07049	0.946499	1.21072	0.0342339	0.0199595	0.16146	3.63929	4	0.457017	6.5811	5	0.253704
3004_67_PDCD1LG2_PD_L2	GCST90277260	Weighted median	6	0.0514117	0.0579974	0.375377	-0.0622633	0.165087	1.05276	0.939635	1.1795	0.0342339	0.0199595	0.16146	3.63929	4	0.457017	6.5811	5	0.253704
3004_67_PDCD1LG2_PD_L2	GCST90277260	Maximum likelihood	6	0.0683163	0.0548634	0.213055	-0.0392159	0.175849	1.0707	0.961543	1.19226	0.0342339	0.0199595	0.16146	3.63929	4	0.457017	6.5811	5	0.253704
3004_67_PDCD1LG2_PD_L2	GCST90277260	MR Egger	6	-0.0623898	0.0937344	0.542083	-0.246109	0.12133	0.939517	0.781837	1.129	0.0342339	0.0199595	0.16146	3.63929	4	0.457017	6.5811	5	0.253704
3234_23_CCDC80_URB	GCST90277260	Inverse variance weighted	7	-0.0459755	0.113244	0.684753	-0.267934	0.175983	0.955065	0.764958	1.19242	0.0185522	0.0489581	0.720291	7.16291	5	0.208804	7.36862	6	0.288098
3234_23_CCDC80_URB	GCST90277260	Weighted median	7	0.0283895	0.130514	0.827802	-0.227418	0.284197	1.0288	0.796588	1.32869	0.0185522	0.0489581	0.720291	7.16291	5	0.208804	7.36862	6	0.288098
3234_23_CCDC80_URB	GCST90277260	Maximum likelihood	7	-0.0464383	0.102728	0.651233	-0.247786	0.154909	0.954623	0.780527	1.16755	0.0185522	0.0489581	0.720291	7.16291	5	0.208804	7.36862	6	0.288098
3234_23_CCDC80_URB	GCST90277260	MR Egger	7	-0.26883	0.600682	0.673208	-1.44617	0.908508	0.764273	0.235471	2.48062	0.0185522	0.0489581	0.720291	7.16291	5	0.208804	7.36862	6	0.288098
6605_17_IGFALS_IGFALS	GCST90277260	Inverse variance weighted	10	-0.106083	0.0756849	0.161024	-0.254425	0.0422598	0.89935	0.775362	1.04317	-0.0034064	0.0173779	0.849483	14.0767	8	0.0797886	14.1443	9	0.117285
6605_17_IGFALS_IGFALS	GCST90277260	Weighted median	10	-0.124802	0.0732645	0.0884837	-0.268401	0.0187959	0.882671	0.764601	1.01897	-0.0034064	0.0173779	0.849483	14.0767	8	0.0797886	14.1443	9	0.117285
6605_17_IGFALS_IGFALS	GCST90277260	Maximum likelihood	10	-0.106817	0.0608657	0.0792661	-0.226114	0.0124799	0.89869	0.797628	1.01256	-0.0034064	0.0173779	0.849483	14.0767	8	0.0797886	14.1443	9	0.117285
6605_17_IGFALS_IGFALS	GCST90277260	MR Egger	10	-0.0926506	0.105399	0.405005	-0.299233	0.113932	0.911512	0.741387	1.12068	-0.0034064	0.0173779	0.849483	14.0767	8	0.0797886	14.1443	9	0.117285
id.exposure	id.outcome	method	nsnp	b	se_mr	pval_mr	lo_ci	up_ci	or	or_lci95	or_uci95	egger_intercept	se_pleio	pval_pleio	Q_MR_Egger	Q_df_MR_Egger	Q_pval_MR_Egger	Q_ivw	Q_df_ivw	Q_pval_ivw
3004_67_PDCD1LG2_PD_L2	GCST90277307	Inverse variance weighted	6	-0.037222	0.0517978	0.472386	-0.138746	0.0643017	0.963462	0.870449	1.06641	0.0016666	0.0188193	0.93369	1.3971	4	0.844699	1.40494	5	0.923772
3004_67_PDCD1LG2_PD_L2	GCST90277307	Weighted median	6	-0.0363676	0.0551904	0.509929	-0.144541	0.0718056	0.964286	0.86542	1.07445	0.0016666	0.0188193	0.93369	1.3971	4	0.844699	1.40494	5	0.923772
3004_67_PDCD1LG2_PD_L2	GCST90277307	Maximum likelihood	6	-0.0372929	0.05186	0.472075	-0.138938	0.0643527	0.963394	0.870282	1.06647	0.0016666	0.0188193	0.93369	1.3971	4	0.844699	1.40494	5	0.923772
3004_67_PDCD1LG2_PD_L2	GCST90277307	MR Egger	6	-0.0435868	0.0885911	0.648499	-0.217225	0.130052	0.957349	0.804749	1.13889	0.0016666	0.0188193	0.93369	1.3971	4	0.844699	1.40494	5	0.923772
3234_23_CCDC80_URB	GCST90277307	Inverse variance weighted	7	-0.199417	0.102865	0.0525455	-0.401032	0.00219747	0.819208	0.669628	1.0022	0.0516373	0.038788	0.240569	5.06029	5	0.408566	6.85394	6	0.334566
3234_23_CCDC80_URB	GCST90277307	Weighted median	7	-0.272772	0.120403	0.0234825	-0.508763	-0.0367822	0.761266	0.601239	0.963886	0.0516373	0.038788	0.240569	5.06029	5	0.408566	6.85394	6	0.334566
3234_23_CCDC80_URB	GCST90277307	Maximum likelihood	7	-0.201278	0.0971549	0.0382909	-0.391702	-0.0108549	0.817685	0.675906	0.989204	0.0516373	0.038788	0.240569	5.06029	5	0.408566	6.85394	6	0.334566
3234_23_CCDC80_URB	GCST90277307	MR Egger	7	-0.820072	0.476161	0.145637	-1.75335	0.113203	0.4404	0.173193	1.11986	0.0516373	0.038788	0.240569	5.06029	5	0.408566	6.85394	6	0.334566
6605_17_IGFALS_IGFALS	GCST90277307	Inverse variance weighted	10	-0.0222745	0.0654147	0.73347	-0.150487	0.105938	0.977972	0.860289	1.11175	0.0282851	0.0122757	0.0501442	6.83307	8	0.554746	12.1422	9	0.20541
6605_17_IGFALS_IGFALS	GCST90277307	Weighted median	10	-0.0990534	0.0689178	0.150642	-0.234132	0.0360255	0.905694	0.791257	1.03668	0.0282851	0.0122757	0.0501442	6.83307	8	0.554746	12.1422	9	0.20541
6605_17_IGFALS_IGFALS	GCST90277307	Maximum likelihood	10	-0.0220732	0.0565997	0.696545	-0.133009	0.0888622	0.978169	0.875457	1.09293	0.0282851	0.0122757	0.0501442	6.83307	8	0.554746	12.1422	9	0.20541
6605_17_IGFALS_IGFALS	GCST90277307	MR Egger	10	-0.132116	0.073785	0.111146	-0.276735	0.0125028	0.876239	0.758256	1.01258	0.0282851	0.0122757	0.0501442	6.83307	8	0.554746	12.1422	9	0.20541
id.exposure	id.outcome	method	nsnp	b	se_mr	pval_mr	lo_ci	up_ci	or	or_lci95	or_uci95	egger_intercept	se_pleio	pval_pleio	Q_MR_Egger	Q_df_MR_Egger	Q_pval_MR_Egger	Q_ivw	Q_df_ivw	Q_pval_ivw
3004_67_PDCD1LG2_PD_L2	GCST90277319	Inverse variance weighted	6	0.0231254	0.0960646	0.809766	-0.165161	0.211412	1.02339	0.847757	1.23542	0.0243446	0.0369582	0.546071	12.4351	4	0.0143926	13.784	5	0.0170413
3004_67_PDCD1LG2_PD_L2	GCST90277319	Weighted median	6	0.0168143	0.0623099	0.787276	-0.105313	0.138942	1.01696	0.900043	1.14906	0.0243446	0.0369582	0.546071	12.4351	4	0.0143926	13.784	5	0.0170413
3004_67_PDCD1LG2_PD_L2	GCST90277319	Maximum likelihood	6	0.0233093	0.0580922	0.688239	-0.0905515	0.13717	1.02358	0.913427	1.14702	0.0243446	0.0369582	0.546071	12.4351	4	0.0143926	13.784	5	0.0170413
3004_67_PDCD1LG2_PD_L2	GCST90277319	MR Egger	6	-0.0701043	0.174467	0.70836	-0.412059	0.27185	0.932297	0.662285	1.31239	0.0243446	0.0369582	0.546071	12.4351	4	0.0143926	13.784	5	0.0170413
3234_23_CCDC80_URB	GCST90277319	Inverse variance weighted	7	-0.0527824	0.106699	0.620824	-0.261913	0.156348	0.948586	0.769578	1.16923	-3.20029e-05	0.0423143	0.999426	4.85288	5	0.434097	4.85288	6	0.562816
3234_23_CCDC80_URB	GCST90277319	Weighted median	7	0.0467713	0.12997	0.718951	-0.20797	0.301513	1.04788	0.812231	1.3519	-3.20029e-05	0.0423143	0.999426	4.85288	5	0.434097	4.85288	6	0.562816
3234_23_CCDC80_URB	GCST90277319	Maximum likelihood	7	-0.0533326	0.107282	0.619102	-0.263606	0.156941	0.948065	0.768276	1.16993	-3.20029e-05	0.0423143	0.999426	4.85288	5	0.434097	4.85288	6	0.562816
3234_23_CCDC80_URB	GCST90277319	MR Egger	7	-0.0523978	0.519606	0.923595	-1.07083	0.96603	0.948951	0.342725	2.62749	-3.20029e-05	0.0423143	0.999426	4.85288	5	0.434097	4.85288	6	0.562816
6605_17_IGFALS_IGFALS	GCST90277319	Inverse variance weighted	10	-0.0552668	0.0795096	0.486995	-0.211106	0.100572	0.946233	0.809689	1.1058	-0.0385462	0.0136772	0.0225537	6.29817	8	0.61387	14.2409	9	0.114012
6605_17_IGFALS_IGFALS	GCST90277319	Weighted median	10	-0.0194116	0.0740101	0.793104	-0.164471	0.125648	0.980776	0.848342	1.13388	-0.0385462	0.0136772	0.0225537	6.29817	8	0.61387	14.2409	9	0.114012
6605_17_IGFALS_IGFALS	GCST90277319	Maximum likelihood	10	-0.056069	0.0636531	0.378397	-0.180829	0.068691	0.945474	0.834578	1.07111	-0.0385462	0.0136772	0.0225537	6.29817	8	0.61387	14.2409	9	0.114012
6605_17_IGFALS_IGFALS	GCST90277319	MR Egger	10	0.0964155	0.0830178	0.278964	-0.0662995	0.25913	1.10122	0.935851	1.2958	-0.0385462	0.0136772	0.0225537	6.29817	8	0.61387	14.2409	9	0.114012
id.exposure	id.outcome	method	nsnp	b	se_mr	pval_mr	lo_ci	up_ci	or	or_lci95	or_uci95	egger_intercept	se_pleio	pval_pleio	Q_MR_Egger	Q_df_MR_Egger	Q_pval_MR_Egger	Q_ivw	Q_df_ivw	Q_pval_ivw
3004_67_PDCD1LG2_PD_L2	GCST90277328	Inverse variance weighted	6	0.0560725	0.0595199	0.346152	-0.0605865	0.172732	1.05767	0.941212	1.18855	-0.0271924	0.0199832	0.245213	4.58012	4	0.333153	6.70035	5	0.243897
3004_67_PDCD1LG2_PD_L2	GCST90277328	Weighted median	6	0.0925133	0.0537786	0.0853848	-0.0128928	0.197919	1.09693	0.98719	1.21886	-0.0271924	0.0199832	0.245213	4.58012	4	0.333153	6.70035	5	0.243897
3004_67_PDCD1LG2_PD_L2	GCST90277328	Maximum likelihood	6	0.0563585	0.0515953	0.274693	-0.0447683	0.157485	1.05798	0.956219	1.17056	-0.0271924	0.0199832	0.245213	4.58012	4	0.333153	6.70035	5	0.243897
3004_67_PDCD1LG2_PD_L2	GCST90277328	MR Egger	6	0.159909	0.0940737	0.164388	-0.0244753	0.344294	1.1734	0.975822	1.41099	-0.0271924	0.0199832	0.245213	4.58012	4	0.333153	6.70035	5	0.243897
3234_23_CCDC80_URB	GCST90277328	Inverse variance weighted	7	-0.140776	0.0955322	0.14059	-0.328019	0.0464672	0.868684	0.720349	1.04756	-0.0174312	0.0381332	0.666763	4.1617	5	0.526377	4.37066	6	0.62665
3234_23_CCDC80_URB	GCST90277328	Weighted median	7	-0.173053	0.124373	0.164102	-0.416823	0.0707175	0.841093	0.659137	1.07328	-0.0174312	0.0381332	0.666763	4.1617	5	0.526377	4.37066	6	0.62665
3234_23_CCDC80_URB	GCST90277328	Maximum likelihood	7	-0.142082	0.0962926	0.140071	-0.330816	0.0466513	0.86755	0.718337	1.04776	-0.0174312	0.0381332	0.666763	4.1617	5	0.526377	4.37066	6	0.62665
3234_23_CCDC80_URB	GCST90277328	MR Egger	7	0.0686448	0.467991	0.889115	-0.848617	0.985906	1.07106	0.428007	2.68024	-0.0174312	0.0381332	0.666763	4.1617	5	0.526377	4.37066	6	0.62665
6605_17_IGFALS_IGFALS	GCST90277328	Inverse variance weighted	10	0.0170794	0.0569306	0.764174	-0.0945045	0.128663	1.01723	0.909824	1.13731	-0.0141652	0.012203	0.279189	7.97444	8	0.435971	9.32189	9	0.408107
6605_17_IGFALS_IGFALS	GCST90277328	Weighted median	10	0.0314368	0.0670532	0.639189	-0.0999876	0.162861	1.03194	0.904849	1.17687	-0.0141652	0.012203	0.279189	7.97444	8	0.435971	9.32189	9	0.408107
6605_17_IGFALS_IGFALS	GCST90277328	Maximum likelihood	10	0.0172655	0.0561281	0.75838	-0.0927455	0.127277	1.01742	0.911425	1.13573	-0.0141652	0.012203	0.279189	7.97444	8	0.435971	9.32189	9	0.408107
6605_17_IGFALS_IGFALS	GCST90277328	MR Egger	10	0.072157	0.0733519	0.354069	-0.0716127	0.215927	1.07482	0.930891	1.24101	-0.0141652	0.012203	0.279189	7.97444	8	0.435971	9.32189	9	0.408107
id.exposure	id.outcome	method	nsnp	b	se_mr	pval_mr	lo_ci	up_ci	or	or_lci95	or_uci95	egger_intercept	se_pleio	pval_pleio	Q_MR_Egger	Q_df_MR_Egger	Q_pval_MR_Egger	Q_ivw	Q_df_ivw	Q_pval_ivw
3004_67_PDCD1LG2_PD_L2	GCST90277345	Inverse variance weighted	6	0.0298949	0.058299	0.608101	-0.0843711	0.144161	1.03035	0.91909	1.15507	0.00450636	0.0213213	0.842942	0.717567	4	0.949145	0.762238	5	0.979379
3004_67_PDCD1LG2_PD_L2	GCST90277345	Weighted median	6	0.0314093	0.0620141	0.612515	-0.0901384	0.152957	1.03191	0.913805	1.16527	0.00450636	0.0213213	0.842942	0.717567	4	0.949145	0.762238	5	0.979379
3004_67_PDCD1LG2_PD_L2	GCST90277345	Maximum likelihood	6	0.0299192	0.0583167	0.607918	-0.0843815	0.14422	1.03037	0.919081	1.15514	0.00450636	0.0213213	0.842942	0.717567	4	0.949145	0.762238	5	0.979379
3004_67_PDCD1LG2_PD_L2	GCST90277345	MR Egger	6	0.0127251	0.0999909	0.904874	-0.183257	0.208707	1.01281	0.832554	1.23208	0.00450636	0.0213213	0.842942	0.717567	4	0.949145	0.762238	5	0.979379
3234_23_CCDC80_URB	GCST90277345	Inverse variance weighted	7	-0.0997595	0.108682	0.358672	-0.312777	0.113258	0.905055	0.731413	1.11992	-0.0036394	0.0431976	0.936127	1.69944	5	0.888971	1.70654	6	0.944616
3234_23_CCDC80_URB	GCST90277345	Weighted median	7	-0.104486	0.129281	0.418973	-0.357876	0.148905	0.900788	0.699159	1.16056	-0.0036394	0.0431976	0.936127	1.69944	5	0.888971	1.70654	6	0.944616
3234_23_CCDC80_URB	GCST90277345	Maximum likelihood	7	-0.100032	0.10894	0.358501	-0.313554	0.113491	0.904809	0.730845	1.12018	-0.0036394	0.0431976	0.936127	1.69944	5	0.888971	1.70654	6	0.944616
3234_23_CCDC80_URB	GCST90277345	MR Egger	7	-0.0560922	0.529579	0.919765	-1.09407	0.981883	0.945452	0.334852	2.66948	-0.0036394	0.0431976	0.936127	1.69944	5	0.888971	1.70654	6	0.944616
6605_17_IGFALS_IGFALS	GCST90277345	Inverse variance weighted	10	-0.0855878	0.064429	0.184044	-0.211869	0.040693	0.917973	0.809071	1.04153	-0.0188589	0.0139139	0.212313	5.71704	8	0.678893	7.55415	9	0.579623
6605_17_IGFALS_IGFALS	GCST90277345	Weighted median	10	-0.0474155	0.0759347	0.532348	-0.196247	0.101416	0.953691	0.821809	1.10674	-0.0188589	0.0139139	0.212313	5.71704	8	0.678893	7.55415	9	0.579623
6605_17_IGFALS_IGFALS	GCST90277345	Maximum likelihood	10	-0.0868084	0.064671	0.179496	-0.213563	0.0399467	0.916853	0.807701	1.04076	-0.0188589	0.0139139	0.212313	5.71704	8	0.678893	7.55415	9	0.579623
6605_17_IGFALS_IGFALS	GCST90277345	MR Egger	10	-0.01144	0.0845208	0.895678	-0.177101	0.154221	0.988625	0.837695	1.16675	-0.0188589	0.0139139	0.212313	5.71704	8	0.678893	7.55415	9	0.579623
id.exposure	id.outcome	method	nsnp	b	se_mr	pval_mr	lo_ci	up_ci	or	or_lci95	or_uci95	egger_intercept	se_pleio	pval_pleio	Q_MR_Egger	Q_df_MR_Egger	Q_pval_MR_Egger	Q_ivw	Q_df_ivw	Q_pval_ivw
3004_67_PDCD1LG2_PD_L2	GCST90277349	Inverse variance weighted	6	-0.0407638	0.0516666	0.430125	-0.14203	0.0605027	0.960056	0.867595	1.06237	-0.00925962	0.0188137	0.648385	1.73187	4	0.78492	1.97411	5	0.852716
3004_67_PDCD1LG2_PD_L2	GCST90277349	Weighted median	6	-0.0376831	0.0545683	0.489837	-0.144637	0.0692707	0.963018	0.865336	1.07173	-0.00925962	0.0188137	0.648385	1.73187	4	0.78492	1.97411	5	0.852716
3004_67_PDCD1LG2_PD_L2	GCST90277349	Maximum likelihood	6	-0.0408184	0.0516896	0.429712	-0.14213	0.0604932	0.960003	0.867508	1.06236	-0.00925962	0.0188137	0.648385	1.73187	4	0.78492	1.97411	5	0.852716
3004_67_PDCD1LG2_PD_L2	GCST90277349	MR Egger	6	-0.00544505	0.0884252	0.953853	-0.178758	0.167868	0.99457	0.836308	1.18278	-0.00925962	0.0188137	0.648385	1.73187	4	0.78492	1.97411	5	0.852716
3234_23_CCDC80_URB	GCST90277349	Inverse variance weighted	7	0.0043895	0.0986606	0.964513	-0.188985	0.197764	1.0044	0.827799	1.21868	0.0302203	0.0410646	0.494832	5.71845	5	0.334586	6.33785	6	0.386427
3234_23_CCDC80_URB	GCST90277349	Weighted median	7	0.0226612	0.130797	0.862451	-0.233701	0.279024	1.02292	0.791598	1.32184	0.0302203	0.0410646	0.494832	5.71845	5	0.334586	6.33785	6	0.386427
3234_23_CCDC80_URB	GCST90277349	Maximum likelihood	7	0.00445288	0.0966459	0.963251	-0.184973	0.193879	1.00446	0.831127	1.21395	0.0302203	0.0410646	0.494832	5.71845	5	0.334586	6.33785	6	0.386427
3234_23_CCDC80_URB	GCST90277349	MR Egger	7	-0.358742	0.504005	0.508422	-1.34659	0.629108	0.698554	0.260125	1.87594	0.0302203	0.0410646	0.494832	5.71845	5	0.334586	6.33785	6	0.386427
6605_17_IGFALS_IGFALS	GCST90277349	Inverse variance weighted	10	-0.022218	0.0592897	0.707856	-0.138426	0.0939897	0.978027	0.870728	1.09855	-0.0151831	0.0126159	0.263188	8.45002	8	0.390789	9.97989	9	0.352116
6605_17_IGFALS_IGFALS	GCST90277349	Weighted median	10	0.0129873	0.066323	0.844752	-0.117006	0.142981	1.01307	0.88958	1.15371	-0.0151831	0.0126159	0.263188	8.45002	8	0.390789	9.97989	9	0.352116
6605_17_IGFALS_IGFALS	GCST90277349	Maximum likelihood	10	-0.022434	0.0565284	0.691469	-0.13323	0.0883616	0.977816	0.875264	1.09238	-0.0151831	0.0126159	0.263188	8.45002	8	0.390789	9.97989	9	0.352116
6605_17_IGFALS_IGFALS	GCST90277349	MR Egger	10	0.0368629	0.0758842	0.640149	-0.11187	0.185596	1.03755	0.89416	1.20394	-0.0151831	0.0126159	0.263188	8.45002	8	0.390789	9.97989	9	0.352116
id.exposure	id.outcome	method	nsnp	b	se_mr	pval_mr	lo_ci	up_ci	or	or_lci95	or_uci95	egger_intercept	se_pleio	pval_pleio	Q_MR_Egger	Q_df_MR_Egger	Q_pval_MR_Egger	Q_ivw	Q_df_ivw	Q_pval_ivw
3004_67_PDCD1LG2_PD_L2	GCST90277381	Inverse variance weighted	6	0.041047	0.0727347	0.572523	-0.101513	0.183607	1.0419	0.903469	1.20154	0.01542	0.0286341	0.618789	7.25995	4	0.122772	7.7863	5	0.168413
3004_67_PDCD1LG2_PD_L2	GCST90277381	Weighted median	6	0.0241969	0.0627335	0.699712	-0.0987608	0.147155	1.02449	0.905959	1.15853	0.01542	0.0286341	0.618789	7.25995	4	0.122772	7.7863	5	0.168413
3004_67_PDCD1LG2_PD_L2	GCST90277381	Maximum likelihood	6	0.0412757	0.0585191	0.4806	-0.0734217	0.155973	1.04214	0.929209	1.16879	0.01542	0.0286341	0.618789	7.25995	4	0.122772	7.7863	5	0.168413
3004_67_PDCD1LG2_PD_L2	GCST90277381	MR Egger	6	-0.0178164	0.134587	0.901077	-0.281608	0.245975	0.982341	0.75457	1.27887	0.01542	0.0286341	0.618789	7.25995	4	0.122772	7.7863	5	0.168413
3234_23_CCDC80_URB	GCST90277381	Inverse variance weighted	7	-0.0494717	0.1319	0.707609	-0.307996	0.209053	0.951732	0.734918	1.23251	-0.0120737	0.0575452	0.842096	8.71794	5	0.120858	8.79469	6	0.185458
3234_23_CCDC80_URB	GCST90277381	Weighted median	7	-0.00421205	0.137168	0.975503	-0.273061	0.264637	0.995797	0.761047	1.30296	-0.0120737	0.0575452	0.842096	8.71794	5	0.120858	8.79469	6	0.185458
3234_23_CCDC80_URB	GCST90277381	Maximum likelihood	7	-0.050126	0.109752	0.647872	-0.26524	0.164988	0.95111	0.767022	1.17938	-0.0120737	0.0575452	0.842096	8.71794	5	0.120858	8.79469	6	0.185458
3234_23_CCDC80_URB	GCST90277381	MR Egger	7	0.095558	0.706048	0.897621	-1.2883	1.47941	1.10027	0.27574	4.39036	-0.0120737	0.0575452	0.842096	8.71794	5	0.120858	8.79469	6	0.185458
6605_17_IGFALS_IGFALS	GCST90277381	Inverse variance weighted	10	-0.0532746	0.0641669	0.406398	-0.179042	0.0724927	0.94812	0.836071	1.07518	0.00116	0.0146744	0.938935	8.88244	8	0.35231	8.88938	9	0.447547
6605_17_IGFALS_IGFALS	GCST90277381	Weighted median	10	-0.0915435	0.0771017	0.235106	-0.242663	0.0595759	0.912522	0.784536	1.06139	0.00116	0.0146744	0.938935	8.88244	8	0.35231	8.88938	9	0.447547
6605_17_IGFALS_IGFALS	GCST90277381	Maximum likelihood	10	-0.0529269	0.0643459	0.410771	-0.179045	0.0731911	0.948449	0.836068	1.07594	0.00116	0.0146744	0.938935	8.88244	8	0.35231	8.88938	9	0.447547
6605_17_IGFALS_IGFALS	GCST90277381	MR Egger	10	-0.0578402	0.0889238	0.533634	-0.232131	0.11645	0.943801	0.792842	1.1235	0.00116	0.0146744	0.938935	8.88244	8	0.35231	8.88938	9	0.447547
id.exposure	id.outcome	method	nsnp	b	se_mr	pval_mr	lo_ci	up_ci	or	or_lci95	or_uci95	egger_intercept	se_pleio	pval_pleio	Q_MR_Egger	Q_df_MR_Egger	Q_pval_MR_Egger	Q_ivw	Q_df_ivw	Q_pval_ivw
3004_67_PDCD1LG2_PD_L2	GCST90277413	Inverse variance weighted	6	0.0235169	0.0604045	0.697037	-0.094876	0.14191	1.0238	0.909486	1.15247	0.0290951	0.0197575	0.214844	4.50659	4	0.341767	6.9498	5	0.224401
3004_67_PDCD1LG2_PD_L2	GCST90277413	Weighted median	6	0.0215667	0.0531433	0.684873	-0.0825941	0.125728	1.0218	0.920725	1.13397	0.0290951	0.0197575	0.214844	4.50659	4	0.341767	6.9498	5	0.224401
3004_67_PDCD1LG2_PD_L2	GCST90277413	Maximum likelihood	6	0.0235251	0.0513318	0.646741	-0.0770853	0.124135	1.0238	0.925811	1.13217	0.0290951	0.0197575	0.214844	4.50659	4	0.341767	6.9498	5	0.224401
3004_67_PDCD1LG2_PD_L2	GCST90277413	MR Egger	6	-0.0875157	0.0929648	0.399809	-0.269727	0.0946953	0.916204	0.763588	1.09932	0.0290951	0.0197575	0.214844	4.50659	4	0.341767	6.9498	5	0.224401
3234_23_CCDC80_URB	GCST90277413	Inverse variance weighted	7	-0.083821	0.119456	0.482872	-0.317954	0.150312	0.919596	0.727636	1.1622	0.0557767	0.0459496	0.279002	7.27974	5	0.200653	9.42504	6	0.151047
3234_23_CCDC80_URB	GCST90277413	Weighted median	7	-0.173874	0.130198	0.181727	-0.429062	0.0813142	0.840403	0.651119	1.08471	0.0557767	0.0459496	0.279002	7.27974	5	0.200653	9.42504	6	0.151047
3234_23_CCDC80_URB	GCST90277413	Maximum likelihood	7	-0.0852686	0.0962168	0.375503	-0.273854	0.103316	0.918266	0.760443	1.10884	0.0557767	0.0459496	0.279002	7.27974	5	0.200653	9.42504	6	0.151047
3234_23_CCDC80_URB	GCST90277413	MR Egger	7	-0.753918	0.563887	0.238823	-1.85914	0.351301	0.470519	0.155807	1.42091	0.0557767	0.0459496	0.279002	7.27974	5	0.200653	9.42504	6	0.151047
6605_17_IGFALS_IGFALS	GCST90277413	Inverse variance weighted	9	-0.104002	0.0565924	0.0661009	-0.214923	0.00691904	0.901223	0.806603	1.00694	0.026566	0.0134563	0.0889334	3.32978	7	0.852913	7.22741	8	0.512308
6605_17_IGFALS_IGFALS	GCST90277413	Weighted median	9	-0.170704	0.0669563	0.0107884	-0.301938	-0.0394693	0.843071	0.739384	0.961299	0.026566	0.0134563	0.0889334	3.32978	7	0.852913	7.22741	8	0.512308
6605_17_IGFALS_IGFALS	GCST90277413	Maximum likelihood	9	-0.102514	0.0568567	0.0713836	-0.213953	0.00892483	0.902565	0.807386	1.00896	0.026566	0.0134563	0.0889334	3.32978	7	0.852913	7.22741	8	0.512308
6605_17_IGFALS_IGFALS	GCST90277413	MR Egger	9	-0.197975	0.0739487	0.0316678	-0.342914	-0.0530355	0.82039	0.709699	0.948346	0.026566	0.0134563	0.0889334	3.32978	7	0.852913	7.22741	8	0.512308

## Sheet: Sheet8
The harmonising SNP between lipid species and proteins																The harmonising SNP between lipid species and proteins
	SNP	effect_allele.exposure	other_allele.exposure	effect_allele.outcome	other_allele.outcome	beta.exposure	beta.outcome	eaf.exposure	remove	palindromic	ambiguous	outcome	se.outcome	pval.outcome	samplesize.outcome	chr.outcome	pos.outcome	se.exposure	pval.exposure	samplesize.exposure	chr.exposure	pos.exposure	exposure	action	SNP_index	mr_keep
1	rs10812660	A	T	A	T	0.0790219	-0.0118	0.375095	FALSE	TRUE	TRUE	3004_67_PDCD1LG2_PD_L2	0.008555	0.16778	35360	chr9	27742537	0.0178603	9.80704e-06	7174	9	27742537	GCST90277238	2	1	FALSE
2	rs11608	A	G	A	G	0.0884663	0.003	0.723361	FALSE	FALSE	FALSE	3004_67_PDCD1LG2_PD_L2	0.008397	0.720889	35374	chr2	27212506	0.0187861	2.5327e-06	7174	2	27212506	GCST90277238	2	1	TRUE
3	rs116778355	T	A	T	A	-0.380271	-0.0301	0.0124697	FALSE	TRUE	TRUE	3004_67_PDCD1LG2_PD_L2	0.031543	0.339954	35369	chr2	224951925	0.0776759	1.00083e-06	7174	2	224951925	GCST90277238	2	1	FALSE
4	rs12787616	C	T	C	T	0.0770731	-0.0036	0.373402	FALSE	FALSE	FALSE	3004_67_PDCD1LG2_PD_L2	0.00837	0.667108	35364	chr11	26008522	0.0174349	9.98064e-06	7174	11	26008522	GCST90277238	2	1	TRUE
5	rs1696359	C	T	C	T	-0.0795863	0.0013	0.584877	FALSE	FALSE	FALSE	3004_67_PDCD1LG2_PD_L2	0.008504	0.878507	35365	chr12	120950756	0.0169855	2.83871e-06	7174	12	120950756	GCST90277238	2	1	TRUE
6	rs1800961	T	C	T	C	-0.186306	0.003	0.0524109	FALSE	FALSE	FALSE	3004_67_PDCD1LG2_PD_L2	0.019408	0.877159	35371	chr20	44413724	0.0372912	5.98971e-07	7174	20	44413724	GCST90277238	2	1	TRUE
7	rs187429064	G	A	G	A	-0.233998	-0.0215	0.0535314	FALSE	FALSE	FALSE	3004_67_PDCD1LG2_PD_L2	0.051753	0.677826	35353	chr19	19269704	0.037881	6.89235e-10	7174	19	19269704	GCST90277238	2	1	TRUE
8	rs2479959	A	G	A	G	-0.0802807	0.0177	0.300314	FALSE	FALSE	FALSE	3004_67_PDCD1LG2_PD_L2	0.008833	0.045097	35345	chr13	111318086	0.0181579	9.94989e-06	7174	13	111318086	GCST90277238	2	1	TRUE
9	rs2686446	C	G	C	G	0.0895928	-0.0031	0.711291	FALSE	TRUE	TRUE	3004_67_PDCD1LG2_PD_L2	0.009092	0.733132	35211	chr3	195507255	0.0184847	1.27882e-06	7174	3	195507255	GCST90277238	2	1	FALSE
10	rs28601761	G	C	G	C	-0.0841313	0.0018	0.409958	FALSE	TRUE	TRUE	3004_67_PDCD1LG2_PD_L2	0.008272	0.827734	35369	chr8	125487789	0.017007	7.70746e-07	7174	8	125487789	GCST90277238	2	1	FALSE
11	rs2964094	C	T	GAATAAA	AAATAAA	0.08746	0.0047	0.753417	TRUE	FALSE	FALSE	3004_67_PDCD1LG2_PD_L2	0.008739	0.590711	35359	chr5	174326694	0.0193	5.94273e-06	7174	5	174326694	GCST90277238	2	1	FALSE
12	rs41289170	A	G	A	G	0.798673	-0.0442	0.00253532	FALSE	FALSE	FALSE	3004_67_PDCD1LG2_PD_L2	0.031561	0.161376	35351	chr1	72791134	0.179051	8.2951e-06	7174	1	72791134	GCST90277238	2	1	TRUE
13	rs4246215	T	G	T	G	-0.0805303	0.0109	0.435753	FALSE	FALSE	FALSE	3004_67_PDCD1LG2_PD_L2	0.00817	0.182167	35367	chr11	61796827	0.0168544	1.80431e-06	7174	11	61796827	GCST90277238	2	1	TRUE
14	rs429358	C	T	C	T	0.141695	-0.0104	0.189202	FALSE	FALSE	FALSE	3004_67_PDCD1LG2_PD_L2	0.010794	0.335297	35368	chr19	44908684	0.0214612	4.33234e-11	7174	19	44908684	GCST90277238	2	1	TRUE
15	rs55764039	C	G	C	G	-0.180786	-0.0108	0.0526965	FALSE	TRUE	TRUE	3004_67_PDCD1LG2_PD_L2	0.027336	0.692783	35366	chr7	17920067	0.0374551	1.41434e-06	7174	7	17920067	GCST90277238	2	1	FALSE
16	rs6045698	C	A	C	A	0.0898031	-0.003	0.264138	FALSE	FALSE	FALSE	3004_67_PDCD1LG2_PD_L2	0.009005	0.739025	35374	chr20	1965583	0.0192	2.95754e-06	7174	20	1965583	GCST90277238	2	1	TRUE
17	rs62232045	C	T	C	T	0.0859271	0.0048	0.34448	FALSE	FALSE	FALSE	3004_67_PDCD1LG2_PD_L2	0.008067	0.551855	35371	chr22	43503538	0.0175818	1.04471e-06	7174	22	43503538	GCST90277238	2	1	TRUE
18	rs7198817	A	C	GTGGACGGT	GTGGACGGG	0.0762666	0.0063	0.577731	TRUE	FALSE	FALSE	3004_67_PDCD1LG2_PD_L2	0.008276	0.446504	35381	chr16	11851913	0.017021	7.54788e-06	7174	16	11851921	GCST90277238	2	1	FALSE
19	rs75922719	C	T	C	T	0.481467	-0.0297	0.00683692	FALSE	FALSE	FALSE	3004_67_PDCD1LG2_PD_L2	0.031909	0.351974	35361	chr15	93906166	0.10268	2.79444e-06	7174	15	93906166	GCST90277238	2	1	TRUE
20	rs7957768	T	G	T	G	-0.0868074	0.0184	0.521115	FALSE	FALSE	FALSE	3004_67_PDCD1LG2_PD_L2	0.008225	0.025286	35364	chr12	101754541	0.0167419	2.21473e-07	7174	12	101754541	GCST90277238	2	1	TRUE
21	rs80195215	G	A	G	A	-0.186648	0.0271	0.0466472	FALSE	FALSE	FALSE	3004_67_PDCD1LG2_PD_L2	0.016425	0.098955	35375	chr10	122133760	0.041025	5.45613e-06	7174	10	122133760	GCST90277238	2	1	TRUE
22	rs10812660	A	T	A	T	0.0790219	-0.01	0.375095	FALSE	TRUE	TRUE	3234_23_CCDC80_URB	0.008561	0.242758	35360	chr9	27742537	0.0178603	9.80704e-06	7174	9	27742537	GCST90277238	2	1	FALSE
23	rs11608	A	G	A	G	0.0884663	-0.0117	0.723361	FALSE	FALSE	FALSE	3234_23_CCDC80_URB	0.008612	0.174296	35374	chr2	27212506	0.0187861	2.5327e-06	7174	2	27212506	GCST90277238	2	1	TRUE
24	rs116778355	T	A	T	A	-0.380271	0.05	0.0124697	FALSE	TRUE	TRUE	3234_23_CCDC80_URB	0.031953	0.117635	35369	chr2	224951925	0.0776759	1.00083e-06	7174	2	224951925	GCST90277238	2	1	FALSE
25	rs12787616	C	T	C	T	0.0770731	0.0066	0.373402	FALSE	FALSE	FALSE	3234_23_CCDC80_URB	0.008555	0.440439	35364	chr11	26008522	0.0174349	9.98064e-06	7174	11	26008522	GCST90277238	2	1	TRUE
26	rs1696359	C	T	C	T	-0.0795863	-0.0116	0.584877	FALSE	FALSE	FALSE	3234_23_CCDC80_URB	0.008585	0.176642	35365	chr12	120950756	0.0169855	2.83871e-06	7174	12	120950756	GCST90277238	2	1	TRUE
27	rs1800961	T	C	T	C	-0.186306	-0.0253	0.0524109	FALSE	FALSE	FALSE	3234_23_CCDC80_URB	0.019693	0.198879	35371	chr20	44413724	0.0372912	5.98971e-07	7174	20	44413724	GCST90277238	2	1	TRUE
28	rs187429064	G	A	G	A	-0.233998	-0.0379	0.0535314	FALSE	FALSE	FALSE	3234_23_CCDC80_URB	0.052577	0.471006	35353	chr19	19269704	0.037881	6.89235e-10	7174	19	19269704	GCST90277238	2	1	TRUE
29	rs2479959	A	G	A	G	-0.0802807	0.0072	0.300314	FALSE	FALSE	FALSE	3234_23_CCDC80_URB	0.008875	0.417216	35345	chr13	111318086	0.0181579	9.94989e-06	7174	13	111318086	GCST90277238	2	1	TRUE
30	rs2686446	C	G	C	G	0.0895928	-0.0023	0.711291	FALSE	TRUE	TRUE	3234_23_CCDC80_URB	0.009218	0.802975	35211	chr3	195507255	0.0184847	1.27882e-06	7174	3	195507255	GCST90277238	2	1	FALSE
31	rs28601761	G	C	G	C	-0.0841313	0.0135	0.409958	FALSE	TRUE	TRUE	3234_23_CCDC80_URB	0.008275	0.102804	35369	chr8	125487789	0.017007	7.70746e-07	7174	8	125487789	GCST90277238	2	1	FALSE
32	rs2964094	C	T	GAATAAA	AAATAAA	0.08746	0.0167	0.753417	TRUE	FALSE	FALSE	3234_23_CCDC80_URB	0.008913	0.06098	35359	chr5	174326694	0.0193	5.94273e-06	7174	5	174326694	GCST90277238	2	1	FALSE
33	rs41289170	A	G	A	G	0.798673	0.0365	0.00253532	FALSE	FALSE	FALSE	3234_23_CCDC80_URB	0.031995	0.253954	35351	chr1	72791134	0.179051	8.2951e-06	7174	1	72791134	GCST90277238	2	1	TRUE
34	rs4246215	T	G	T	G	-0.0805303	-0.0017	0.435753	FALSE	FALSE	FALSE	3234_23_CCDC80_URB	0.008135	0.834478	35367	chr11	61796827	0.0168544	1.80431e-06	7174	11	61796827	GCST90277238	2	1	TRUE
35	rs429358	C	T	C	T	0.141695	-0.0269	0.189202	FALSE	FALSE	FALSE	3234_23_CCDC80_URB	0.010882	0.013439	35368	chr19	44908684	0.0214612	4.33234e-11	7174	19	44908684	GCST90277238	2	1	TRUE
36	rs55764039	C	G	C	G	-0.180786	-0.0103	0.0526965	FALSE	TRUE	TRUE	3234_23_CCDC80_URB	0.027826	0.711262	35366	chr7	17920067	0.0374551	1.41434e-06	7174	7	17920067	GCST90277238	2	1	FALSE
37	rs6045698	C	A	C	A	0.0898031	-0.0082	0.264138	FALSE	FALSE	FALSE	3234_23_CCDC80_URB	0.009177	0.37155	35374	chr20	1965583	0.0192	2.95754e-06	7174	20	1965583	GCST90277238	2	1	TRUE
38	rs62232045	C	T	C	T	0.0859271	-0.0008	0.34448	FALSE	FALSE	FALSE	3234_23_CCDC80_URB	0.007926	0.919605	35371	chr22	43503538	0.0175818	1.04471e-06	7174	22	43503538	GCST90277238	2	1	TRUE
39	rs7198817	A	C	GTGGACGGT	GTGGACGGG	0.0762666	0.0161	0.577731	TRUE	FALSE	FALSE	3234_23_CCDC80_URB	0.008449	0.056718	35381	chr16	11851913	0.017021	7.54788e-06	7174	16	11851921	GCST90277238	2	1	FALSE
40	rs75922719	C	T	C	T	0.481467	-0.0497	0.00683692	FALSE	FALSE	FALSE	3234_23_CCDC80_URB	0.032331	0.124244	35361	chr15	93906166	0.10268	2.79444e-06	7174	15	93906166	GCST90277238	2	1	TRUE
41	rs7957768	T	G	T	G	-0.0868074	0.009	0.521115	FALSE	FALSE	FALSE	3234_23_CCDC80_URB	0.008345	0.280799	35364	chr12	101754541	0.0167419	2.21473e-07	7174	12	101754541	GCST90277238	2	1	TRUE
42	rs80195215	G	A	G	A	-0.186648	0.0161	0.0466472	FALSE	FALSE	FALSE	3234_23_CCDC80_URB	0.016669	0.334115	35375	chr10	122133760	0.041025	5.45613e-06	7174	10	122133760	GCST90277238	2	1	TRUE
43	rs10812660	A	T	A	T	0.0790219	-0.0001	0.375095	FALSE	TRUE	TRUE	6605_17_IGFALS_IGFALS	0.013166	0.99394	35360	chr9	27742537	0.0178603	9.80704e-06	7174	9	27742537	GCST90277238	2	1	FALSE
44	rs11608	A	G	A	G	0.0884663	0.0078	0.723361	FALSE	FALSE	FALSE	6605_17_IGFALS_IGFALS	0.008617	0.365391	35374	chr2	27212506	0.0187861	2.5327e-06	7174	2	27212506	GCST90277238	2	1	TRUE
45	rs116778355	T	A	T	A	-0.380271	0.0421	0.0124697	FALSE	TRUE	TRUE	6605_17_IGFALS_IGFALS	0.031851	0.18624	35369	chr2	224951925	0.0776759	1.00083e-06	7174	2	224951925	GCST90277238	2	1	FALSE
46	rs12787616	C	T	C	T	0.0770731	-0.0046	0.373402	FALSE	FALSE	FALSE	6605_17_IGFALS_IGFALS	0.008483	0.587645	35364	chr11	26008522	0.0174349	9.98064e-06	7174	11	26008522	GCST90277238	2	1	TRUE
47	rs1696359	C	T	C	T	-0.0795863	-0.0287	0.584877	FALSE	FALSE	FALSE	6605_17_IGFALS_IGFALS	0.008559	0.0007989	35365	chr12	120950756	0.0169855	2.83871e-06	7174	12	120950756	GCST90277238	2	1	TRUE
48	rs1800961	T	C	T	C	-0.186306	-0.0526	0.0524109	FALSE	FALSE	FALSE	6605_17_IGFALS_IGFALS	0.019631	0.007374	35371	chr20	44413724	0.0372912	5.98971e-07	7174	20	44413724	GCST90277238	2	1	TRUE
49	rs187429064	G	A	G	A	-0.233998	-0.0615	0.0535314	FALSE	FALSE	FALSE	6605_17_IGFALS_IGFALS	0.052383	0.240379	35353	chr19	19269704	0.037881	6.89235e-10	7174	19	19269704	GCST90277238	2	1	TRUE
50	rs2479959	A	G	A	G	-0.0802807	0.0013	0.300314	FALSE	FALSE	FALSE	6605_17_IGFALS_IGFALS	0.008909	0.883986	35345	chr13	111318086	0.0181579	9.94989e-06	7174	13	111318086	GCST90277238	2	1	TRUE
51	rs2686446	C	G	C	G	0.0895928	0.0068	0.711291	FALSE	TRUE	TRUE	6605_17_IGFALS_IGFALS	0.009105	0.455162	35211	chr3	195507255	0.0184847	1.27882e-06	7174	3	195507255	GCST90277238	2	1	FALSE
52	rs28601761	G	C	G	C	-0.0841313	-0.0201	0.409958	FALSE	TRUE	TRUE	6605_17_IGFALS_IGFALS	0.008271	0.015092	35369	chr8	125487789	0.017007	7.70746e-07	7174	8	125487789	GCST90277238	2	1	FALSE
53	rs2964094	C	T	GAATAAA	AAATAAA	0.08746	-0.006	0.753417	TRUE	FALSE	FALSE	6605_17_IGFALS_IGFALS	0.008876	0.499049	35359	chr5	174326694	0.0193	5.94273e-06	7174	5	174326694	GCST90277238	2	1	FALSE
54	rs41289170	A	G	A	G	0.798673	0.0111	0.00253532	FALSE	FALSE	FALSE	6605_17_IGFALS_IGFALS	0.031743	0.726577	35351	chr1	72791134	0.179051	8.2951e-06	7174	1	72791134	GCST90277238	2	1	TRUE
55	rs4246215	T	G	T	G	-0.0805303	0.018	0.435753	FALSE	FALSE	FALSE	6605_17_IGFALS_IGFALS	0.008279	0.029696	35367	chr11	61796827	0.0168544	1.80431e-06	7174	11	61796827	GCST90277238	2	1	TRUE
56	rs429358	C	T	C	T	0.141695	-0.0397	0.189202	FALSE	FALSE	FALSE	6605_17_IGFALS_IGFALS	0.010861	0.0002569	35368	chr19	44908684	0.0214612	4.33234e-11	7174	19	44908684	GCST90277238	2	1	TRUE
57	rs55764039	C	G	C	G	-0.180786	-0.0344	0.0526965	FALSE	TRUE	TRUE	6605_17_IGFALS_IGFALS	0.027657	0.213573	35366	chr7	17920067	0.0374551	1.41434e-06	7174	7	17920067	GCST90277238	2	1	FALSE
58	rs6045698	C	A	C	A	0.0898031	0.0114	0.264138	FALSE	FALSE	FALSE	6605_17_IGFALS_IGFALS	0.009112	0.210882	35374	chr20	1965583	0.0192	2.95754e-06	7174	20	1965583	GCST90277238	2	1	TRUE
59	rs62232045	C	T	C	T	0.0859271	0.0026	0.34448	FALSE	FALSE	FALSE	6605_17_IGFALS_IGFALS	0.008318	0.754604	35371	chr22	43503538	0.0175818	1.04471e-06	7174	22	43503538	GCST90277238	2	1	TRUE
60	rs7198817	A	C	GTGGACGGT	GTGGACGGG	0.0762666	0.0111	0.577731	TRUE	FALSE	FALSE	6605_17_IGFALS_IGFALS	0.008496	0.191391	35381	chr16	11851913	0.017021	7.54788e-06	7174	16	11851921	GCST90277238	2	1	FALSE
61	rs75922719	C	T	C	T	0.481467	0.0537	0.00683692	FALSE	FALSE	FALSE	6605_17_IGFALS_IGFALS	0.032192	0.095294	35361	chr15	93906166	0.10268	2.79444e-06	7174	15	93906166	GCST90277238	2	1	TRUE
62	rs7957768	T	G	T	G	-0.0868074	-0.0011	0.521115	FALSE	FALSE	FALSE	6605_17_IGFALS_IGFALS	0.008192	0.893182	35364	chr12	101754541	0.0167419	2.21473e-07	7174	12	101754541	GCST90277238	2	1	TRUE
63	rs80195215	G	A	G	A	-0.186648	-0.0056	0.0466472	FALSE	FALSE	FALSE	6605_17_IGFALS_IGFALS	0.016505	0.734384	35375	chr10	122133760	0.041025	5.45613e-06	7174	10	122133760	GCST90277238	2	1	TRUE
	SNP	effect_allele.exposure	other_allele.exposure	effect_allele.outcome	other_allele.outcome	beta.exposure	beta.outcome	eaf.exposure	remove	palindromic	ambiguous	id.outcome	se.outcome	pval.outcome	samplesize.outcome	chr.outcome	pos.outcome	se.exposure	pval.exposure	samplesize.exposure	chr.exposure	pos.exposure	exposure	action	SNP_index	mr_keep
1	rs1002079	G	C	G	C	-0.142387	-0.0028	0.100545	FALSE	TRUE	TRUE	3004_67_PDCD1LG2_PD_L2	0.012608	0.824247	35358	chr16	76465100	0.0280342	3.88677e-07	7047	16	76465100	GCST90277242	2	1	FALSE
2	rs10241012	G	A	G	A	0.118223	0.0538	0.122733	FALSE	FALSE	FALSE	3004_67_PDCD1LG2_PD_L2	0.012838	2.781e-05	35365	chr7	104334784	0.025873	4.97647e-06	7047	7	104334784	GCST90277242	2	1	TRUE
3	rs10775274	C	T	C	T	0.170395	0.0129	0.938366	FALSE	FALSE	FALSE	3004_67_PDCD1LG2_PD_L2	0.037208	0.72882	35372	chr16	25212475	0.0357677	1.93268e-06	7047	16	25212475	GCST90277242	2	1	TRUE
4	rs10881589	T	C	T	C	0.0786601	0.0113	0.433292	FALSE	FALSE	FALSE	3004_67_PDCD1LG2_PD_L2	0.008776	0.197908	35362	chr9	134243611	0.0176416	8.36759e-06	7047	9	134243611	GCST90277242	2	1	TRUE
5	rs112403250	T	G	T	G	-0.243863	-0.0199	0.0248749	FALSE	FALSE	FALSE	3004_67_PDCD1LG2_PD_L2	0.022436	0.375098	35358	chr9	86205460	0.053475	5.19292e-06	7047	9	86205460	GCST90277242	2	1	TRUE
6	rs11265455	G	A	G	A	0.119264	0.0325	0.140869	FALSE	FALSE	FALSE	3004_67_PDCD1LG2_PD_L2	0.010657	0.002291	35348	chr1	160650361	0.025622	3.29806e-06	7047	1	160650361	GCST90277242	2	1	TRUE
7	rs113505726	A	G	A	G	-0.192486	-0.0037	0.0418339	FALSE	FALSE	FALSE	3004_67_PDCD1LG2_PD_L2	0.015271	0.808561	35373	chr12	54038501	0.0421794	5.11305e-06	7047	12	54038501	GCST90277242	2	1	TRUE
8	rs116859210	G	A	G	A	0.351253	-0.0169	0.0122517	FALSE	FALSE	FALSE	3004_67_PDCD1LG2_PD_L2	0.02463	0.492614	35365	chr12	46735737	0.0769236	5.03935e-06	7047	12	46735737	GCST90277242	2	1	TRUE
9	rs12296850	G	A	G	A	0.173088	-0.022	0.0543108	FALSE	FALSE	FALSE	3004_67_PDCD1LG2_PD_L2	0.017108	0.198459	35365	chr12	100426307	0.0376135	4.25846e-06	7047	12	100426307	GCST90277242	2	1	TRUE
10	rs12735602	A	C	A	C	0.0759366	-0.0078	0.541073	FALSE	FALSE	FALSE	3004_67_PDCD1LG2_PD_L2	0.008086	0.334711	35363	chr1	210320724	0.0170987	9.08501e-06	7047	1	210320724	GCST90277242	2	1	TRUE
11	rs12921107	C	T	C	T	-0.125335	-0.0204	0.141514	FALSE	FALSE	FALSE	3004_67_PDCD1LG2_PD_L2	0.011933	0.087346	35313	chr16	292437	0.024234	2.37996e-07	7047	16	292437	GCST90277242	2	1	TRUE
12	rs13125535	G	T	G	T	0.0860677	0.011	0.598462	FALSE	FALSE	FALSE	3004_67_PDCD1LG2_PD_L2	0.008274	0.183687	35362	chr4	12263787	0.0171841	5.60703e-07	7047	4	12263787	GCST90277242	2	1	TRUE
13	rs140015624	C	T	C	T	0.322919	-0.0462	0.0158041	FALSE	FALSE	FALSE	3004_67_PDCD1LG2_PD_L2	0.043041	0.283097	35374	chr11	71313656	0.0690378	2.95542e-06	7047	11	71313656	GCST90277242	2	1	TRUE
14	rs17791425	A	G	A	G	0.180099	-0.0015	0.0500313	FALSE	FALSE	FALSE	3004_67_PDCD1LG2_PD_L2	0.017125	0.930203	35336	chr6	84260623	0.0393889	4.89545e-06	7047	6	84260623	GCST90277242	2	1	TRUE
15	rs1868072	C	T	C	T	-0.082947	0.0051	0.705183	FALSE	FALSE	FALSE	3004_67_PDCD1LG2_PD_L2	0.009199	0.579289	35361	chr2	30180840	0.0186157	8.46516e-06	7047	2	30180840	GCST90277242	2	1	TRUE
16	rs2280696	T	A	T	A	0.203799	-0.0113	0.126228	FALSE	TRUE	TRUE	3004_67_PDCD1LG2_PD_L2	0.017777	0.525003	35372	chr12	53118972	0.0251576	6.3685e-16	7047	12	53118972	GCST90277242	2	1	FALSE
17	rs2358779	A	G	A	G	-0.242808	-0.0465	0.971338	FALSE	FALSE	FALSE	3004_67_PDCD1LG2_PD_L2	0.024827	0.061077	35363	chr16	31850641	0.0531681	5.03217e-06	7047	16	31850641	GCST90277242	2	1	TRUE
18	rs2382335	C	T	C	T	0.101852	0.013	0.834553	FALSE	FALSE	FALSE	3004_67_PDCD1LG2_PD_L2	0.011339	0.251597	35349	chr9	12243520	0.0226815	7.20685e-06	7047	9	12243520	GCST90277242	2	1	TRUE
19	rs28582101	G	C	G	C	-0.107796	-0.0026	0.823268	FALSE	TRUE	TRUE	3004_67_PDCD1LG2_PD_L2	0.009848	0.791771	35370	chr22	36797580	0.0227609	2.21987e-06	7047	22	36797580	GCST90277242	2	1	FALSE
20	rs4246215	T	G	T	G	-0.0845995	0.0109	0.435753	FALSE	FALSE	FALSE	3004_67_PDCD1LG2_PD_L2	0.00817	0.182167	35367	chr11	61796827	0.017008	6.70073e-07	7047	11	61796827	GCST90277242	2	1	TRUE
21	rs429358	C	T	C	T	0.121765	-0.0104	0.189202	FALSE	FALSE	FALSE	3004_67_PDCD1LG2_PD_L2	0.010794	0.335297	35368	chr19	44908684	0.0216407	1.90515e-08	7047	19	44908684	GCST90277242	2	1	TRUE
22	rs635634	C	T	C	T	-0.100165	0.0398	0.79789	FALSE	FALSE	FALSE	3004_67_PDCD1LG2_PD_L2	0.012088	0.000993	35371	chr9	133279427	0.0209797	1.83827e-06	7047	9	133279427	GCST90277242	2	1	TRUE
23	rs72945021	A	T	A	T	-0.0997238	-0.0149	0.183056	FALSE	TRUE	TRUE	3004_67_PDCD1LG2_PD_L2	0.012634	0.238253	35357	chr2	211666173	0.0218321	5.00768e-06	7047	2	211666173	GCST90277242	2	1	FALSE
24	rs77943189	G	A	G	A	0.33595	-0.0121	0.0159565	FALSE	FALSE	FALSE	3004_67_PDCD1LG2_PD_L2	0.02218	0.585379	35356	chr6	122284176	0.0706886	2.04609e-06	7047	6	122284176	GCST90277242	2	1	TRUE
25	rs79528439	A	T	A	T	-0.131526	-0.0188	0.118366	FALSE	TRUE	TRUE	3004_67_PDCD1LG2_PD_L2	0.011976	0.11647	35359	chr15	48709000	0.0265727	7.59619e-07	7047	15	48709000	GCST90277242	2	1	FALSE
26	rs79568254	A	T	A	T	-0.309836	-0.0505	0.0149096	FALSE	TRUE	TRUE	3004_67_PDCD1LG2_PD_L2	0.0524	0.335174	35356	chr4	136648128	0.0691531	7.56018e-06	7047	4	136648128	GCST90277242	2	1	FALSE
27	rs9827613	G	A	G	A	-0.0753765	-0.0078	0.461015	FALSE	FALSE	FALSE	3004_67_PDCD1LG2_PD_L2	0.008236	0.343622	35366	chr3	11833970	0.0169197	8.50672e-06	7047	3	11833970	GCST90277242	2	1	TRUE
28	rs1002079	G	C	G	C	-0.142387	-0.0173	0.100545	FALSE	TRUE	TRUE	3234_23_CCDC80_URB	0.012596	0.169603	35358	chr16	76465100	0.0280342	3.88677e-07	7047	16	76465100	GCST90277242	2	1	FALSE
29	rs10241012	G	A	G	A	0.118223	0.005	0.122733	FALSE	FALSE	FALSE	3234_23_CCDC80_URB	0.012952	0.69947	35365	chr7	104334784	0.025873	4.97647e-06	7047	7	104334784	GCST90277242	2	1	TRUE
30	rs10775274	C	T	C	T	0.170395	0.0655	0.938366	FALSE	FALSE	FALSE	3234_23_CCDC80_URB	0.037679	0.082149	35372	chr16	25212475	0.0357677	1.93268e-06	7047	16	25212475	GCST90277242	2	1	TRUE
31	rs10881589	T	C	T	C	0.0786601	0.0058	0.433292	FALSE	FALSE	FALSE	3234_23_CCDC80_URB	0.008747	0.507255	35362	chr9	134243611	0.0176416	8.36759e-06	7047	9	134243611	GCST90277242	2	1	TRUE
32	rs112403250	T	G	T	G	-0.243863	-0.034	0.0248749	FALSE	FALSE	FALSE	3234_23_CCDC80_URB	0.022554	0.131685	35358	chr9	86205460	0.053475	5.19292e-06	7047	9	86205460	GCST90277242	2	1	TRUE
33	rs11265455	G	A	G	A	0.119264	0.0081	0.140869	FALSE	FALSE	FALSE	3234_23_CCDC80_URB	0.01081	0.45367	35348	chr1	160650361	0.025622	3.29806e-06	7047	1	160650361	GCST90277242	2	1	TRUE
34	rs113505726	A	G	A	G	-0.192486	-0.0128	0.0418339	FALSE	FALSE	FALSE	3234_23_CCDC80_URB	0.015607	0.412132	35373	chr12	54038501	0.0421794	5.11305e-06	7047	12	54038501	GCST90277242	2	1	TRUE
35	rs116859210	G	A	G	A	0.351253	0.0194	0.0122517	FALSE	FALSE	FALSE	3234_23_CCDC80_URB	0.024884	0.43561	35365	chr12	46735737	0.0769236	5.03935e-06	7047	12	46735737	GCST90277242	2	1	TRUE
36	rs12296850	G	A	G	A	0.173088	-0.0233	0.0543108	FALSE	FALSE	FALSE	3234_23_CCDC80_URB	0.017358	0.179489	35365	chr12	100426307	0.0376135	4.25846e-06	7047	12	100426307	GCST90277242	2	1	TRUE
37	rs12735602	A	C	A	C	0.0759366	-0.0117	0.541073	FALSE	FALSE	FALSE	3234_23_CCDC80_URB	0.008153	0.151251	35363	chr1	210320724	0.0170987	9.08501e-06	7047	1	210320724	GCST90277242	2	1	TRUE
38	rs12921107	C	T	C	T	-0.125335	-0.0279	0.141514	FALSE	FALSE	FALSE	3234_23_CCDC80_URB	0.012129	0.021428	35313	chr16	292437	0.024234	2.37996e-07	7047	16	292437	GCST90277242	2	1	TRUE
39	rs13125535	G	T	G	T	0.0860677	0.0141	0.598462	FALSE	FALSE	FALSE	3234_23_CCDC80_URB	0.008423	0.094138	35362	chr4	12263787	0.0171841	5.60703e-07	7047	4	12263787	GCST90277242	2	1	TRUE
40	rs140015624	C	T	C	T	0.322919	-0.0546	0.0158041	FALSE	FALSE	FALSE	3234_23_CCDC80_URB	0.043654	0.211031	35374	chr11	71313656	0.0690378	2.95542e-06	7047	11	71313656	GCST90277242	2	1	TRUE
41	rs17791425	A	G	A	G	0.180099	-0.0091	0.0500313	FALSE	FALSE	FALSE	3234_23_CCDC80_URB	0.017193	0.596602	35336	chr6	84260623	0.0393889	4.89545e-06	7047	6	84260623	GCST90277242	2	1	TRUE
42	rs1868072	C	T	C	T	-0.082947	0.0092	0.705183	FALSE	FALSE	FALSE	3234_23_CCDC80_URB	0.009219	0.318293	35361	chr2	30180840	0.0186157	8.46516e-06	7047	2	30180840	GCST90277242	2	1	TRUE
43	rs2280696	T	A	T	A	0.203799	0.0012	0.126228	FALSE	TRUE	TRUE	3234_23_CCDC80_URB	0.018612	0.948592	35372	chr12	53118972	0.0251576	6.3685e-16	7047	12	53118972	GCST90277242	2	1	FALSE
44	rs2358779	A	G	A	G	-0.242808	-0.0229	0.971338	FALSE	FALSE	FALSE	3234_23_CCDC80_URB	0.025176	0.363042	35363	chr16	31850641	0.0531681	5.03217e-06	7047	16	31850641	GCST90277242	2	1	TRUE
45	rs2382335	C	T	C	T	0.101852	-0.002	0.834553	FALSE	FALSE	FALSE	3234_23_CCDC80_URB	0.011188	0.85812	35349	chr9	12243520	0.0226815	7.20685e-06	7047	9	12243520	GCST90277242	2	1	TRUE
46	rs28582101	G	C	G	C	-0.107796	0.004	0.823268	FALSE	TRUE	TRUE	3234_23_CCDC80_URB	0.010146	0.693406	35370	chr22	36797580	0.0227609	2.21987e-06	7047	22	36797580	GCST90277242	2	1	FALSE
47	rs4246215	T	G	T	G	-0.0845995	-0.0017	0.435753	FALSE	FALSE	FALSE	3234_23_CCDC80_URB	0.008135	0.834478	35367	chr11	61796827	0.017008	6.70073e-07	7047	11	61796827	GCST90277242	2	1	TRUE
48	rs429358	C	T	C	T	0.121765	-0.0269	0.189202	FALSE	FALSE	FALSE	3234_23_CCDC80_URB	0.010882	0.013439	35368	chr19	44908684	0.0216407	1.90515e-08	7047	19	44908684	GCST90277242	2	1	TRUE
49	rs635634	C	T	C	T	-0.100165	-0.0314	0.79789	FALSE	FALSE	FALSE	3234_23_CCDC80_URB	0.012155	0.009788	35371	chr9	133279427	0.0209797	1.83827e-06	7047	9	133279427	GCST90277242	2	1	TRUE
50	rs72945021	A	T	A	T	-0.0997238	0.0096	0.183056	FALSE	TRUE	TRUE	3234_23_CCDC80_URB	0.012846	0.454886	35357	chr2	211666173	0.0218321	5.00768e-06	7047	2	211666173	GCST90277242	2	1	FALSE
51	rs77943189	G	A	G	A	0.33595	0.0281	0.0159565	FALSE	FALSE	FALSE	3234_23_CCDC80_URB	0.022493	0.21156	35356	chr6	122284176	0.0706886	2.04609e-06	7047	6	122284176	GCST90277242	2	1	TRUE
52	rs79528439	A	T	A	T	-0.131526	0.0002	0.118366	FALSE	TRUE	TRUE	3234_23_CCDC80_URB	0.013502	0.988182	35359	chr15	48709000	0.0265727	7.59619e-07	7047	15	48709000	GCST90277242	2	1	FALSE
53	rs79568254	A	T	A	T	-0.309836	-0.1299	0.0149096	FALSE	TRUE	TRUE	3234_23_CCDC80_URB	0.053151	0.014526	35356	chr4	136648128	0.0691531	7.56018e-06	7047	4	136648128	GCST90277242	2	1	FALSE
54	rs9827613	G	A	G	A	-0.0753765	-0.0078	0.461015	FALSE	FALSE	FALSE	3234_23_CCDC80_URB	0.008274	0.345826	35366	chr3	11833970	0.0169197	8.50672e-06	7047	3	11833970	GCST90277242	2	1	TRUE
55	rs1002079	G	C	G	C	-0.142387	-0.0028	0.100545	FALSE	TRUE	TRUE	6605_17_IGFALS_IGFALS	0.012497	0.822711	35358	chr16	76465100	0.0280342	3.88677e-07	7047	16	76465100	GCST90277242	2	1	FALSE
56	rs10241012	G	A	G	A	0.118223	0.0175	0.122733	FALSE	FALSE	FALSE	6605_17_IGFALS_IGFALS	0.012987	0.177803	35365	chr7	104334784	0.025873	4.97647e-06	7047	7	104334784	GCST90277242	2	1	TRUE
57	rs10775274	C	T	C	T	0.170395	-0.0804	0.938366	FALSE	FALSE	FALSE	6605_17_IGFALS_IGFALS	0.037761	0.033238	35372	chr16	25212475	0.0357677	1.93268e-06	7047	16	25212475	GCST90277242	2	1	TRUE
58	rs10881589	T	C	T	C	0.0786601	0.0144	0.433292	FALSE	FALSE	FALSE	6605_17_IGFALS_IGFALS	0.008766	0.100462	35362	chr9	134243611	0.0176416	8.36759e-06	7047	9	134243611	GCST90277242	2	1	TRUE
59	rs112403250	T	G	T	G	-0.243863	0.004	0.0248749	FALSE	FALSE	FALSE	6605_17_IGFALS_IGFALS	0.022696	0.860106	35358	chr9	86205460	0.053475	5.19292e-06	7047	9	86205460	GCST90277242	2	1	TRUE
60	rs11265455	G	A	G	A	0.119264	0.022	0.140869	FALSE	FALSE	FALSE	6605_17_IGFALS_IGFALS	0.010747	0.040644	35348	chr1	160650361	0.025622	3.29806e-06	7047	1	160650361	GCST90277242	2	1	TRUE
61	rs113505726	A	G	A	G	-0.192486	-0.0075	0.0418339	FALSE	FALSE	FALSE	6605_17_IGFALS_IGFALS	0.015542	0.629415	35373	chr12	54038501	0.0421794	5.11305e-06	7047	12	54038501	GCST90277242	2	1	TRUE
62	rs116859210	G	A	G	A	0.351253	-0.0164	0.0122517	FALSE	FALSE	FALSE	6605_17_IGFALS_IGFALS	0.024887	0.509909	35365	chr12	46735737	0.0769236	5.03935e-06	7047	12	46735737	GCST90277242	2	1	TRUE
63	rs12296850	G	A	G	A	0.173088	-0.0077	0.0543108	FALSE	FALSE	FALSE	6605_17_IGFALS_IGFALS	0.01731	0.656437	35365	chr12	100426307	0.0376135	4.25846e-06	7047	12	100426307	GCST90277242	2	1	TRUE
64	rs12735602	A	C	A	C	0.0759366	-0.0074	0.541073	FALSE	FALSE	FALSE	6605_17_IGFALS_IGFALS	0.008184	0.365894	35363	chr1	210320724	0.0170987	9.08501e-06	7047	1	210320724	GCST90277242	2	1	TRUE
65	rs12921107	C	T	C	T	-0.125335	-0.0015	0.141514	FALSE	FALSE	FALSE	6605_17_IGFALS_IGFALS	0.011815	0.898973	35313	chr16	292437	0.024234	2.37996e-07	7047	16	292437	GCST90277242	2	1	TRUE
66	rs13125535	G	T	G	T	0.0860677	-0.0063	0.598462	FALSE	FALSE	FALSE	6605_17_IGFALS_IGFALS	0.008346	0.450338	35362	chr4	12263787	0.0171841	5.60703e-07	7047	4	12263787	GCST90277242	2	1	TRUE
67	rs140015624	C	T	C	T	0.322919	-0.0582	0.0158041	FALSE	FALSE	FALSE	6605_17_IGFALS_IGFALS	0.043512	0.181044	35374	chr11	71313656	0.0690378	2.95542e-06	7047	11	71313656	GCST90277242	2	1	TRUE
68	rs17791425	A	G	A	G	0.180099	-0.0149	0.0500313	FALSE	FALSE	FALSE	6605_17_IGFALS_IGFALS	0.017194	0.386169	35336	chr6	84260623	0.0393889	4.89545e-06	7047	6	84260623	GCST90277242	2	1	TRUE
69	rs1868072	C	T	C	T	-0.082947	-0.0003	0.705183	FALSE	FALSE	FALSE	6605_17_IGFALS_IGFALS	0.00971	0.975352	35361	chr2	30180840	0.0186157	8.46516e-06	7047	2	30180840	GCST90277242	2	1	TRUE
70	rs2280696	T	A	T	A	0.203799	0.0102	0.126228	FALSE	TRUE	TRUE	6605_17_IGFALS_IGFALS	0.018009	0.571142	35372	chr12	53118972	0.0251576	6.3685e-16	7047	12	53118972	GCST90277242	2	1	FALSE
71	rs2358779	A	G	A	G	-0.242808	-0.0069	0.971338	FALSE	FALSE	FALSE	6605_17_IGFALS_IGFALS	0.025192	0.784166	35363	chr16	31850641	0.0531681	5.03217e-06	7047	16	31850641	GCST90277242	2	1	TRUE
72	rs2382335	C	T	C	T	0.101852	-0.0005	0.834553	FALSE	FALSE	FALSE	6605_17_IGFALS_IGFALS	0.01211	0.967067	35349	chr9	12243520	0.0226815	7.20685e-06	7047	9	12243520	GCST90277242	2	1	TRUE
73	rs28582101	G	C	G	C	-0.107796	-0.0024	0.823268	FALSE	TRUE	TRUE	6605_17_IGFALS_IGFALS	0.010221	0.814351	35370	chr22	36797580	0.0227609	2.21987e-06	7047	22	36797580	GCST90277242	2	1	FALSE
74	rs4246215	T	G	T	G	-0.0845995	0.018	0.435753	FALSE	FALSE	FALSE	6605_17_IGFALS_IGFALS	0.008279	0.029696	35367	chr11	61796827	0.017008	6.70073e-07	7047	11	61796827	GCST90277242	2	1	TRUE
75	rs429358	C	T	C	T	0.121765	-0.0397	0.189202	FALSE	FALSE	FALSE	6605_17_IGFALS_IGFALS	0.010861	0.0002569	35368	chr19	44908684	0.0216407	1.90515e-08	7047	19	44908684	GCST90277242	2	1	TRUE
76	rs635634	C	T	C	T	-0.100165	0.0102	0.79789	FALSE	FALSE	FALSE	6605_17_IGFALS_IGFALS	0.012128	0.400322	35371	chr9	133279427	0.0209797	1.83827e-06	7047	9	133279427	GCST90277242	2	1	TRUE
77	rs72945021	A	T	A	T	-0.0997238	-0.0118	0.183056	FALSE	TRUE	TRUE	6605_17_IGFALS_IGFALS	0.012809	0.356932	35357	chr2	211666173	0.0218321	5.00768e-06	7047	2	211666173	GCST90277242	2	1	FALSE
78	rs77943189	G	A	G	A	0.33595	-0.0097	0.0159565	FALSE	FALSE	FALSE	6605_17_IGFALS_IGFALS	0.022469	0.665957	35356	chr6	122284176	0.0706886	2.04609e-06	7047	6	122284176	GCST90277242	2	1	TRUE
79	rs79528439	A	T	A	T	-0.131526	-0.0055	0.118366	FALSE	TRUE	TRUE	6605_17_IGFALS_IGFALS	0.012006	0.646877	35359	chr15	48709000	0.0265727	7.59619e-07	7047	15	48709000	GCST90277242	2	1	FALSE
80	rs79568254	A	T	A	T	-0.309836	-0.0439	0.0149096	FALSE	TRUE	TRUE	6605_17_IGFALS_IGFALS	0.053082	0.408226	35356	chr4	136648128	0.0691531	7.56018e-06	7047	4	136648128	GCST90277242	2	1	FALSE
81	rs9827613	G	A	G	A	-0.0753765	-0.0038	0.461015	FALSE	FALSE	FALSE	6605_17_IGFALS_IGFALS	0.008187	0.642558	35366	chr3	11833970	0.0169197	8.50672e-06	7047	3	11833970	GCST90277242	2	1	TRUE
	SNP	effect_allele.exposure	other_allele.exposure	effect_allele.outcome	other_allele.outcome	beta.exposure	beta.outcome	eaf.exposure	remove	palindromic	ambiguous	id.outcome	se.outcome	pval.outcome	samplesize.outcome	chr.outcome	pos.outcome	se.exposure	pval.exposure	samplesize.exposure	chr.exposure	pos.exposure	exposure	action	SNP_index	mr_keep
1	rs10031375	G	C	G	C	0.0752585	-0.0071	0.557801	FALSE	TRUE	TRUE	3004_67_PDCD1LG2_PD_L2	0.008071	0.379047	35366	chr4	37043069	0.0165421	5.46173e-06	7157	4	37043069	GCST90277244	2	1	FALSE
2	rs10735853	C	T	C	T	-0.0789559	-0.0023	0.48218	FALSE	FALSE	FALSE	3004_67_PDCD1LG2_PD_L2	0.008015	0.774141	35363	chr12	53924362	0.0167897	2.61404e-06	7157	12	53924362	GCST90277244	2	1	TRUE
3	rs10879574	A	G	A	G	0.0889799	0.0127	0.237067	FALSE	FALSE	FALSE	3004_67_PDCD1LG2_PD_L2	0.009054	0.160712	35366	chr12	73198257	0.0198396	7.40109e-06	7157	12	73198257	GCST90277244	2	1	TRUE
4	rs11130797	A	G	A	G	0.0834853	-0.0118	0.300261	FALSE	FALSE	FALSE	3004_67_PDCD1LG2_PD_L2	0.009151	0.197214	35360	chr3	60928407	0.0181957	4.54418e-06	7157	3	60928407	GCST90277244	2	1	TRUE
5	rs11154240	C	T	C	T	0.0941404	-0.0137	0.782737	FALSE	FALSE	FALSE	3004_67_PDCD1LG2_PD_L2	0.011016	0.213636	35366	chr6	124457214	0.0201755	3.12324e-06	7157	6	124457214	GCST90277244	2	1	TRUE
6	rs113270487	A	G	A	G	0.174924	-0.0147	0.052498	FALSE	FALSE	FALSE	3004_67_PDCD1LG2_PD_L2	0.015331	0.337625	35387	chr1	5333063	0.038294	5.00075e-06	7157	1	5333063	GCST90277244	2	1	TRUE
7	rs11646327	G	A	G	A	0.0932891	0.0008	0.254977	FALSE	FALSE	FALSE	3004_67_PDCD1LG2_PD_L2	0.009145	0.930288	35369	chr16	29117117	0.0192243	1.24252e-06	7157	16	29117117	GCST90277244	2	1	TRUE
8	rs12575187	T	C	T	C	-0.113333	-0.0081	0.125715	FALSE	FALSE	FALSE	3004_67_PDCD1LG2_PD_L2	0.011583	0.484365	35363	chr11	48176734	0.0249148	5.47804e-06	7157	11	48176734	GCST90277244	2	1	TRUE
9	rs13405349	T	G	T	G	-0.100598	-0.0143	0.185083	FALSE	FALSE	FALSE	3004_67_PDCD1LG2_PD_L2	0.012111	0.237721	35356	chr2	211659523	0.0216248	3.34562e-06	7157	2	211659523	GCST90277244	2	1	TRUE
10	rs134783	C	T	C	T	0.0813707	0.0199	0.398061	FALSE	FALSE	FALSE	3004_67_PDCD1LG2_PD_L2	0.008293	0.016411	35372	chr22	27255754	0.0171476	2.11938e-06	7157	22	27255754	GCST90277244	2	1	TRUE
11	rs141162511	T	C	T	C	0.267313	0.0997	0.0197573	FALSE	FALSE	FALSE	3004_67_PDCD1LG2_PD_L2	0.053872	0.064216	35363	chr2	172761437	0.0598999	8.21469e-06	7157	2	172761437	GCST90277244	2	1	TRUE
12	rs144944992	T	C	T	C	0.494641	-0.0506	0.00943105	FALSE	FALSE	FALSE	3004_67_PDCD1LG2_PD_L2	0.039366	0.198666	35367	chr1	164790578	0.0896755	3.58445e-08	7157	1	164790578	GCST90277244	2	1	TRUE
13	rs17181296	A	G	A	G	0.121626	-0.0417	0.113762	FALSE	FALSE	FALSE	3004_67_PDCD1LG2_PD_L2	0.016236	0.01022	35376	chr6	154117109	0.0270025	6.76012e-06	7157	6	154117109	GCST90277244	2	1	TRUE
14	rs17242295	C	G	C	G	0.0811354	-0.0028	0.318872	FALSE	TRUE	TRUE	3004_67_PDCD1LG2_PD_L2	0.008753	0.749054	35379	chr7	136137436	0.0179964	6.62959e-06	7157	7	136137436	GCST90277244	2	1	FALSE
15	rs17482800	A	G	A	G	-0.130805	0.0145	0.0982629	FALSE	FALSE	FALSE	3004_67_PDCD1LG2_PD_L2	0.013146	0.270015	35361	chr3	137801985	0.0279811	2.99233e-06	7157	3	137801985	GCST90277244	2	1	TRUE
16	rs17725246	C	T	C	T	0.0970678	-0.0063	0.338836	FALSE	FALSE	FALSE	3004_67_PDCD1LG2_PD_L2	0.01003	0.52991	35352	chr7	44542387	0.0176788	4.13556e-08	7157	7	44542387	GCST90277244	2	1	TRUE
17	rs192928655	T	C	T	C	-0.285075	0.0105	0.0236042	FALSE	FALSE	FALSE	3004_67_PDCD1LG2_PD_L2	0.025267	0.677732	35349	chr2	131866759	0.0593392	1.58436e-06	7157	2	131866759	GCST90277244	2	1	TRUE
18	rs2280696	T	A	T	A	0.25386	-0.0113	0.126228	FALSE	TRUE	TRUE	3004_67_PDCD1LG2_PD_L2	0.017777	0.525003	35372	chr12	53118972	0.024949	3.69061e-24	7157	12	53118972	GCST90277244	2	1	FALSE
19	rs30743	C	T	C	T	-0.0951456	-0.0089	0.763317	FALSE	FALSE	FALSE	3004_67_PDCD1LG2_PD_L2	0.009318	0.339486	35357	chr5	135996882	0.0203513	2.98823e-06	7157	5	135996882	GCST90277244	2	1	TRUE
20	rs366590	A	G	A	G	0.08355	0.0022	0.288143	FALSE	FALSE	FALSE	3004_67_PDCD1LG2_PD_L2	0.008716	0.800729	35370	chr11	16850893	0.0186791	7.8295e-06	7157	11	16850893	GCST90277244	2	1	TRUE
21	rs3741298	T	C	T	C	-0.10866	-0.0048	0.765351	FALSE	FALSE	FALSE	3004_67_PDCD1LG2_PD_L2	0.01026	0.639898	35376	chr11	116786845	0.0196057	3.08878e-08	7157	11	116786845	GCST90277244	2	1	TRUE
22	rs4246215	T	G	T	G	-0.111203	0.0109	0.435753	FALSE	FALSE	FALSE	3004_67_PDCD1LG2_PD_L2	0.00817	0.182167	35367	chr11	61796827	0.0168544	4.46858e-11	7157	11	61796827	GCST90277244	2	1	TRUE
23	rs429358	C	T	C	T	0.133624	-0.0104	0.189202	FALSE	FALSE	FALSE	3004_67_PDCD1LG2_PD_L2	0.010794	0.335297	35368	chr19	44908684	0.0214843	5.2565e-10	7157	19	44908684	GCST90277244	2	1	TRUE
24	rs55721138	T	C	T	C	-0.180948	-0.0264	0.053233	FALSE	FALSE	FALSE	3004_67_PDCD1LG2_PD_L2	0.022626	0.243282	35369	chr3	13583299	0.0376118	1.5318e-06	7157	3	13583299	GCST90277244	2	1	TRUE
25	rs56228609	T	C	T	C	-0.10381	-0.0057	0.275513	FALSE	FALSE	FALSE	3004_67_PDCD1LG2_PD_L2	0.008649	0.509866	35369	chr16	56953853	0.0186582	2.73262e-08	7157	16	56953853	GCST90277244	2	1	TRUE
26	rs635634	C	T	C	T	-0.15377	0.0398	0.79789	FALSE	FALSE	FALSE	3004_67_PDCD1LG2_PD_L2	0.012088	0.000993	35371	chr9	133279427	0.0207262	1.31211e-13	7157	9	133279427	GCST90277244	2	1	TRUE
27	rs73005445	G	A	G	A	-0.104413	-0.004	0.253445	FALSE	FALSE	FALSE	3004_67_PDCD1LG2_PD_L2	0.009899	0.686168	35388	chr19	15830645	0.0192175	5.71185e-08	7157	19	15830645	GCST90277244	2	1	TRUE
28	rs7425339	A	T	A	T	0.078654	0.0023	0.623206	FALSE	TRUE	TRUE	3004_67_PDCD1LG2_PD_L2	0.009356	0.80581	35339	chr2	162800402	0.0173871	6.16934e-06	7157	2	162800402	GCST90277244	2	1	FALSE
29	rs10031375	G	C	G	C	0.0752585	-0.0052	0.557801	FALSE	TRUE	TRUE	3234_23_CCDC80_URB	0.008108	0.521301	35366	chr4	37043069	0.0165421	5.46173e-06	7157	4	37043069	GCST90277244	2	1	FALSE
30	rs10735853	C	T	C	T	-0.0789559	0.0106	0.48218	FALSE	FALSE	FALSE	3234_23_CCDC80_URB	0.00818	0.195004	35363	chr12	53924362	0.0167897	2.61404e-06	7157	12	53924362	GCST90277244	2	1	TRUE
31	rs10879574	A	G	A	G	0.0889799	0.0047	0.237067	FALSE	FALSE	FALSE	3234_23_CCDC80_URB	0.009195	0.609236	35366	chr12	73198257	0.0198396	7.40109e-06	7157	12	73198257	GCST90277244	2	1	TRUE
32	rs11130797	A	G	A	G	0.0834853	0.0065	0.300261	FALSE	FALSE	FALSE	3234_23_CCDC80_URB	0.009335	0.486231	35360	chr3	60928407	0.0181957	4.54418e-06	7157	3	60928407	GCST90277244	2	1	TRUE
33	rs11154240	C	T	C	T	0.0941404	-0.0213	0.782737	FALSE	FALSE	FALSE	3234_23_CCDC80_URB	0.011182	0.056808	35366	chr6	124457214	0.0201755	3.12324e-06	7157	6	124457214	GCST90277244	2	1	TRUE
34	rs113270487	A	G	A	G	0.174924	0.0211	0.052498	FALSE	FALSE	FALSE	3234_23_CCDC80_URB	0.015576	0.17554	35387	chr1	5333063	0.038294	5.00075e-06	7157	1	5333063	GCST90277244	2	1	TRUE
35	rs11646327	G	A	G	A	0.0932891	-0.0057	0.254977	FALSE	FALSE	FALSE	3234_23_CCDC80_URB	0.009407	0.544568	35369	chr16	29117117	0.0192243	1.24252e-06	7157	16	29117117	GCST90277244	2	1	TRUE
36	rs12575187	T	C	T	C	-0.113333	-0.004	0.125715	FALSE	FALSE	FALSE	3234_23_CCDC80_URB	0.011846	0.735607	35363	chr11	48176734	0.0249148	5.47804e-06	7157	11	48176734	GCST90277244	2	1	TRUE
37	rs13405349	T	G	T	G	-0.100598	0.0131	0.185083	FALSE	FALSE	FALSE	3234_23_CCDC80_URB	0.012284	0.286235	35356	chr2	211659523	0.0216248	3.34562e-06	7157	2	211659523	GCST90277244	2	1	TRUE
38	rs134783	C	T	C	T	0.0813707	0.0162	0.398061	FALSE	FALSE	FALSE	3234_23_CCDC80_URB	0.008438	0.05488	35372	chr22	27255754	0.0171476	2.11938e-06	7157	22	27255754	GCST90277244	2	1	TRUE
39	rs141162511	T	C	T	C	0.267313	0.0954	0.0197573	FALSE	FALSE	FALSE	3234_23_CCDC80_URB	0.054574	0.080452	35363	chr2	172761437	0.0598999	8.21469e-06	7157	2	172761437	GCST90277244	2	1	TRUE
40	rs144944992	T	C	T	C	0.494641	-0.0388	0.00943105	FALSE	FALSE	FALSE	3234_23_CCDC80_URB	0.039906	0.33091	35367	chr1	164790578	0.0896755	3.58445e-08	7157	1	164790578	GCST90277244	2	1	TRUE
41	rs17181296	A	G	A	G	0.121626	0.0003	0.113762	FALSE	FALSE	FALSE	3234_23_CCDC80_URB	0.018018	0.986716	35376	chr6	154117109	0.0270025	6.76012e-06	7157	6	154117109	GCST90277244	2	1	TRUE
42	rs17242295	C	G	C	G	0.0811354	-0.0009	0.318872	FALSE	TRUE	TRUE	3234_23_CCDC80_URB	0.009043	0.92072	35379	chr7	136137436	0.0179964	6.62959e-06	7157	7	136137436	GCST90277244	2	1	FALSE
43	rs17482800	A	G	A	G	-0.130805	0.0087	0.0982629	FALSE	FALSE	FALSE	3234_23_CCDC80_URB	0.013375	0.515381	35361	chr3	137801985	0.0279811	2.99233e-06	7157	3	137801985	GCST90277244	2	1	TRUE
44	rs17725246	C	T	C	T	0.0970678	0.0062	0.338836	FALSE	FALSE	FALSE	3234_23_CCDC80_URB	0.010118	0.540044	35352	chr7	44542387	0.0176788	4.13556e-08	7157	7	44542387	GCST90277244	2	1	TRUE
45	rs192928655	T	C	T	C	-0.285075	-0.0387	0.0236042	FALSE	FALSE	FALSE	3234_23_CCDC80_URB	0.025687	0.131911	35349	chr2	131866759	0.0593392	1.58436e-06	7157	2	131866759	GCST90277244	2	1	TRUE
46	rs2280696	T	A	T	A	0.25386	0.0012	0.126228	FALSE	TRUE	TRUE	3234_23_CCDC80_URB	0.018612	0.948592	35372	chr12	53118972	0.024949	3.69061e-24	7157	12	53118972	GCST90277244	2	1	FALSE
47	rs30743	C	T	C	T	-0.0951456	0.0138	0.763317	FALSE	FALSE	FALSE	3234_23_CCDC80_URB	0.009453	0.144315	35357	chr5	135996882	0.0203513	2.98823e-06	7157	5	135996882	GCST90277244	2	1	TRUE
48	rs366590	A	G	A	G	0.08355	-0.0036	0.288143	FALSE	FALSE	FALSE	3234_23_CCDC80_URB	0.008909	0.686142	35370	chr11	16850893	0.0186791	7.8295e-06	7157	11	16850893	GCST90277244	2	1	TRUE
49	rs3741298	T	C	T	C	-0.10866	-0.0029	0.765351	FALSE	FALSE	FALSE	3234_23_CCDC80_URB	0.010315	0.778592	35376	chr11	116786845	0.0196057	3.08878e-08	7157	11	116786845	GCST90277244	2	1	TRUE
50	rs4246215	T	G	T	G	-0.111203	-0.0017	0.435753	FALSE	FALSE	FALSE	3234_23_CCDC80_URB	0.008135	0.834478	35367	chr11	61796827	0.0168544	4.46858e-11	7157	11	61796827	GCST90277244	2	1	TRUE
51	rs429358	C	T	C	T	0.133624	-0.0269	0.189202	FALSE	FALSE	FALSE	3234_23_CCDC80_URB	0.010882	0.013439	35368	chr19	44908684	0.0214843	5.2565e-10	7157	19	44908684	GCST90277244	2	1	TRUE
52	rs55721138	T	C	T	C	-0.180948	-0.0095	0.053233	FALSE	FALSE	FALSE	3234_23_CCDC80_URB	0.022781	0.676664	35369	chr3	13583299	0.0376118	1.5318e-06	7157	3	13583299	GCST90277244	2	1	TRUE
53	rs56228609	T	C	T	C	-0.10381	-0.0014	0.275513	FALSE	FALSE	FALSE	3234_23_CCDC80_URB	0.008772	0.873194	35369	chr16	56953853	0.0186582	2.73262e-08	7157	16	56953853	GCST90277244	2	1	TRUE
54	rs635634	C	T	C	T	-0.15377	-0.0314	0.79789	FALSE	FALSE	FALSE	3234_23_CCDC80_URB	0.012155	0.009788	35371	chr9	133279427	0.0207262	1.31211e-13	7157	9	133279427	GCST90277244	2	1	TRUE
55	rs73005445	G	A	G	A	-0.104413	0.0062	0.253445	FALSE	FALSE	FALSE	3234_23_CCDC80_URB	0.009952	0.533273	35388	chr19	15830645	0.0192175	5.71185e-08	7157	19	15830645	GCST90277244	2	1	TRUE
56	rs7425339	A	T	A	T	0.078654	0.0089	0.623206	FALSE	TRUE	TRUE	3234_23_CCDC80_URB	0.009365	0.341918	35339	chr2	162800402	0.0173871	6.16934e-06	7157	2	162800402	GCST90277244	2	1	FALSE
57	rs10031375	G	C	G	C	0.0752585	0.0053	0.557801	FALSE	TRUE	TRUE	6605_17_IGFALS_IGFALS	0.008158	0.515888	35366	chr4	37043069	0.0165421	5.46173e-06	7157	4	37043069	GCST90277244	2	1	FALSE
58	rs10735853	C	T	C	T	-0.0789559	0	0.48218	FALSE	FALSE	FALSE	6605_17_IGFALS_IGFALS	0.006684	0.997798	35363	chr12	53924362	0.0167897	2.61404e-06	7157	12	53924362	GCST90277244	2	1	TRUE
59	rs10879574	A	G	A	G	0.0889799	0.0084	0.237067	FALSE	FALSE	FALSE	6605_17_IGFALS_IGFALS	0.009175	0.359896	35366	chr12	73198257	0.0198396	7.40109e-06	7157	12	73198257	GCST90277244	2	1	TRUE
60	rs11130797	A	G	A	G	0.0834853	0.0003	0.300261	FALSE	FALSE	FALSE	6605_17_IGFALS_IGFALS	0.008022	0.970167	35360	chr3	60928407	0.0181957	4.54418e-06	7157	3	60928407	GCST90277244	2	1	TRUE
61	rs11154240	C	T	C	T	0.0941404	0.008	0.782737	FALSE	FALSE	FALSE	6605_17_IGFALS_IGFALS	0.011125	0.472071	35366	chr6	124457214	0.0201755	3.12324e-06	7157	6	124457214	GCST90277244	2	1	TRUE
62	rs113270487	A	G	A	G	0.174924	0.0559	0.052498	FALSE	FALSE	FALSE	6605_17_IGFALS_IGFALS	0.015521	0.0003162	35387	chr1	5333063	0.038294	5.00075e-06	7157	1	5333063	GCST90277244	2	1	TRUE
63	rs11646327	G	A	G	A	0.0932891	-0.0007	0.254977	FALSE	FALSE	FALSE	6605_17_IGFALS_IGFALS	0.009713	0.942545	35369	chr16	29117117	0.0192243	1.24252e-06	7157	16	29117117	GCST90277244	2	1	TRUE
64	rs12575187	T	C	T	C	-0.113333	-0.0091	0.125715	FALSE	FALSE	FALSE	6605_17_IGFALS_IGFALS	0.011764	0.439184	35363	chr11	48176734	0.0249148	5.47804e-06	7157	11	48176734	GCST90277244	2	1	TRUE
65	rs13405349	T	G	T	G	-0.100598	-0.0132	0.185083	FALSE	FALSE	FALSE	6605_17_IGFALS_IGFALS	0.012272	0.282101	35356	chr2	211659523	0.0216248	3.34562e-06	7157	2	211659523	GCST90277244	2	1	TRUE
66	rs134783	C	T	C	T	0.0813707	0.0057	0.398061	FALSE	FALSE	FALSE	6605_17_IGFALS_IGFALS	0.008378	0.496258	35372	chr22	27255754	0.0171476	2.11938e-06	7157	22	27255754	GCST90277244	2	1	TRUE
67	rs141162511	T	C	T	C	0.267313	-0.0245	0.0197573	FALSE	FALSE	FALSE	6605_17_IGFALS_IGFALS	0.054513	0.653116	35363	chr2	172761437	0.0598999	8.21469e-06	7157	2	172761437	GCST90277244	2	1	TRUE
68	rs144944992	T	C	T	C	0.494641	0.0028	0.00943105	FALSE	FALSE	FALSE	6605_17_IGFALS_IGFALS	0.039519	0.943515	35367	chr1	164790578	0.0896755	3.58445e-08	7157	1	164790578	GCST90277244	2	1	TRUE
69	rs17181296	A	G	A	G	0.121626	-0.013	0.113762	FALSE	FALSE	FALSE	6605_17_IGFALS_IGFALS	0.016387	0.427588	35376	chr6	154117109	0.0270025	6.76012e-06	7157	6	154117109	GCST90277244	2	1	TRUE
70	rs17242295	C	G	C	G	0.0811354	-0.0018	0.318872	FALSE	TRUE	TRUE	6605_17_IGFALS_IGFALS	0.008789	0.837733	35379	chr7	136137436	0.0179964	6.62959e-06	7157	7	136137436	GCST90277244	2	1	FALSE
71	rs17482800	A	G	A	G	-0.130805	-0.0098	0.0982629	FALSE	FALSE	FALSE	6605_17_IGFALS_IGFALS	0.013258	0.459794	35361	chr3	137801985	0.0279811	2.99233e-06	7157	3	137801985	GCST90277244	2	1	TRUE
72	rs17725246	C	T	C	T	0.0970678	0.0097	0.338836	FALSE	FALSE	FALSE	6605_17_IGFALS_IGFALS	0.010187	0.340993	35352	chr7	44542387	0.0176788	4.13556e-08	7157	7	44542387	GCST90277244	2	1	TRUE
73	rs192928655	T	C	T	C	-0.285075	-0.0086	0.0236042	FALSE	FALSE	FALSE	6605_17_IGFALS_IGFALS	0.02554	0.73632	35349	chr2	131866759	0.0593392	1.58436e-06	7157	2	131866759	GCST90277244	2	1	TRUE
74	rs2280696	T	A	T	A	0.25386	0.0102	0.126228	FALSE	TRUE	TRUE	6605_17_IGFALS_IGFALS	0.018009	0.571142	35372	chr12	53118972	0.024949	3.69061e-24	7157	12	53118972	GCST90277244	2	1	FALSE
75	rs30743	C	T	C	T	-0.0951456	0.0007	0.763317	FALSE	FALSE	FALSE	6605_17_IGFALS_IGFALS	0.008818	0.93673	35357	chr5	135996882	0.0203513	2.98823e-06	7157	5	135996882	GCST90277244	2	1	TRUE
76	rs366590	A	G	A	G	0.08355	0.0015	0.288143	FALSE	FALSE	FALSE	6605_17_IGFALS_IGFALS	0.008713	0.86331	35370	chr11	16850893	0.0186791	7.8295e-06	7157	11	16850893	GCST90277244	2	1	TRUE
77	rs3741298	T	C	T	C	-0.10866	0.0004	0.765351	FALSE	FALSE	FALSE	6605_17_IGFALS_IGFALS	0.011534	0.972334	35376	chr11	116786845	0.0196057	3.08878e-08	7157	11	116786845	GCST90277244	2	1	TRUE
78	rs4246215	T	G	T	G	-0.111203	0.018	0.435753	FALSE	FALSE	FALSE	6605_17_IGFALS_IGFALS	0.008279	0.029696	35367	chr11	61796827	0.0168544	4.46858e-11	7157	11	61796827	GCST90277244	2	1	TRUE
79	rs429358	C	T	C	T	0.133624	-0.0397	0.189202	FALSE	FALSE	FALSE	6605_17_IGFALS_IGFALS	0.010861	0.0002569	35368	chr19	44908684	0.0214843	5.2565e-10	7157	19	44908684	GCST90277244	2	1	TRUE
80	rs55721138	T	C	T	C	-0.180948	-0.0118	0.053233	FALSE	FALSE	FALSE	6605_17_IGFALS_IGFALS	0.022856	0.605661	35369	chr3	13583299	0.0376118	1.5318e-06	7157	3	13583299	GCST90277244	2	1	TRUE
81	rs56228609	T	C	T	C	-0.10381	0.0025	0.275513	FALSE	FALSE	FALSE	6605_17_IGFALS_IGFALS	0.008913	0.779096	35369	chr16	56953853	0.0186582	2.73262e-08	7157	16	56953853	GCST90277244	2	1	TRUE
82	rs635634	C	T	C	T	-0.15377	0.0102	0.79789	FALSE	FALSE	FALSE	6605_17_IGFALS_IGFALS	0.012128	0.400322	35371	chr9	133279427	0.0207262	1.31211e-13	7157	9	133279427	GCST90277244	2	1	TRUE
83	rs73005445	G	A	G	A	-0.104413	0.0042	0.253445	FALSE	FALSE	FALSE	6605_17_IGFALS_IGFALS	0.009871	0.670494	35388	chr19	15830645	0.0192175	5.71185e-08	7157	19	15830645	GCST90277244	2	1	TRUE
84	rs7425339	A	T	A	T	0.078654	0.0007	0.623206	FALSE	TRUE	TRUE	6605_17_IGFALS_IGFALS	0.009777	0.942925	35339	chr2	162800402	0.0173871	6.16934e-06	7157	2	162800402	GCST90277244	2	1	FALSE
	SNP	effect_allele.exposure	other_allele.exposure	effect_allele.outcome	other_allele.outcome	beta.exposure	beta.outcome	eaf.exposure	remove	palindromic	ambiguous	id.outcome	se.outcome	pval.outcome	samplesize.outcome	chr.outcome	pos.outcome	se.exposure	pval.exposure	samplesize.exposure	chr.exposure	pos.exposure	exposure	action	SNP_index	mr_keep
1	rs111575978	A	G	A	G	0.289062	0.0393	0.0213174	FALSE	FALSE	FALSE	3004_67_PDCD1LG2_PD_L2	0.037468	0.294222	35366	chr14	46693947	0.0589725	9.70419e-07	7171	14	46693947	GCST90277249	2	1	TRUE
2	rs112478356	C	G	C	G	0.315808	-0.0046	0.0172375	FALSE	TRUE	TRUE	3004_67_PDCD1LG2_PD_L2	0.024854	0.853168	35365	chr2	173688057	0.0667789	2.29427e-06	7171	2	173688057	GCST90277249	2	1	FALSE
3	rs1135999	G	A	G	A	-0.22595	0.0117	0.315252	FALSE	FALSE	FALSE	3004_67_PDCD1LG2_PD_L2	0.009196	0.203281	35379	chr16	15038105	0.0178214	1.90035e-36	7171	16	15038105	GCST90277249	2	1	TRUE
4	rs116917626	T	C	T	C	-0.238479	0.0043	0.0275072	FALSE	FALSE	FALSE	3004_67_PDCD1LG2_PD_L2	0.027481	0.875663	35362	chr17	51561964	0.0525076	5.65998e-06	7171	17	51561964	GCST90277249	2	1	TRUE
5	rs117079226	A	G	A	G	0.375644	-0.0395	0.0114766	FALSE	FALSE	FALSE	3004_67_PDCD1LG2_PD_L2	0.046302	0.393605	35368	chr9	109704483	0.0779374	1.46571e-06	7171	9	109704483	GCST90277249	2	1	TRUE
6	rs117754141	G	C	G	C	0.291278	-0.0198	0.0226497	FALSE	TRUE	TRUE	3004_67_PDCD1LG2_PD_L2	0.02491	0.426685	35375	chr6	109151613	0.0597714	1.1206e-06	7171	6	109151613	GCST90277249	2	1	FALSE
7	rs1428498	G	A	G	A	-0.0812374	0.0079	0.350825	FALSE	FALSE	FALSE	3004_67_PDCD1LG2_PD_L2	0.008973	0.378624	35381	chr5	38698557	0.0172354	2.47985e-06	7171	5	38698557	GCST90277249	2	1	TRUE
8	rs144665282	T	C	T	C	-0.193681	0.0455	0.0411693	FALSE	FALSE	FALSE	3004_67_PDCD1LG2_PD_L2	0.0236	0.053858	35022	chr17	82588500	0.0428763	6.36475e-06	7171	17	82588500	GCST90277249	2	1	TRUE
9	rs1800961	T	C	T	C	-0.23874	0.003	0.0524109	FALSE	FALSE	FALSE	3004_67_PDCD1LG2_PD_L2	0.019408	0.877159	35371	chr20	44413724	0.0372471	1.54881e-10	7171	20	44413724	GCST90277249	2	1	TRUE
10	rs182695896	C	A	C	A	0.28512	-0.0921	0.025305	FALSE	FALSE	FALSE	3004_67_PDCD1LG2_PD_L2	0.061461	0.134003	35351	chr4	73947510	0.0530713	8.00964e-08	7171	4	73947510	GCST90277249	2	1	TRUE
11	rs187429064	G	A	G	A	-0.235892	-0.0215	0.0535314	FALSE	FALSE	FALSE	3004_67_PDCD1LG2_PD_L2	0.051753	0.677826	35353	chr19	19269704	0.0378639	4.92004e-10	7171	19	19269704	GCST90277249	2	1	TRUE
12	rs2352991	G	A	G	A	-0.088946	-0.0035	0.73476	FALSE	FALSE	FALSE	3004_67_PDCD1LG2_PD_L2	0.008972	0.696449	35372	chr14	95283517	0.0191861	3.61402e-06	7171	14	95283517	GCST90277249	2	1	TRUE
13	rs2727271	T	A	T	A	-0.170476	0.0012	0.257859	FALSE	TRUE	TRUE	3004_67_PDCD1LG2_PD_L2	0.010767	0.911257	35367	chr11	61835886	0.0190212	3.9811e-19	7171	11	61835886	GCST90277249	2	1	FALSE
14	rs3752149	C	A	C	A	-0.0915318	0.0032	0.258644	FALSE	FALSE	FALSE	3004_67_PDCD1LG2_PD_L2	0.009366	0.732617	35384	chr19	15729265	0.0193371	2.24765e-06	7171	19	15729265	GCST90277249	2	1	TRUE
15	rs4977342	G	C	CG	CC	-0.0931473	0.0005	0.25096	TRUE	TRUE	TRUE	3004_67_PDCD1LG2_PD_L2	0.008556	0.953402	35363	chr9	19882241	0.0197571	2.46524e-06	7171	9	19882242	GCST90277249	2	1	FALSE
16	rs530804537	A	G	A	G	-0.244913	0.0151	0.0419602	FALSE	FALSE	FALSE	3004_67_PDCD1LG2_PD_L2	0.032019	0.63722	35365	chr1	55117537	0.041657	4.30519e-09	7171	1	55117537	GCST90277249	2	1	TRUE
17	rs56374730	G	T	G	T	0.11198	-0.0154	0.296257	FALSE	FALSE	FALSE	3004_67_PDCD1LG2_PD_L2	0.009236	0.095441	35381	chr16	15773795	0.0183708	1.14556e-09	7171	16	15773795	GCST90277249	2	1	TRUE
18	rs570929	C	G	C	G	-0.0819763	-0.003	0.548187	FALSE	TRUE	TRUE	3004_67_PDCD1LG2_PD_L2	0.008026	0.708548	35352	chr11	88318708	0.0167238	9.70433e-07	7171	11	88318708	GCST90277249	2	1	FALSE
19	rs62217148	T	C	TCAAAGGGACA	TCAAAGGGGCA	-0.19515	0.0098	0.0488087	TRUE	FALSE	FALSE	3004_67_PDCD1LG2_PD_L2	0.023035	0.670511	35372	chr20	18988564	0.0404522	1.43357e-06	7171	20	18988572	GCST90277249	2	1	FALSE
20	rs624605	T	G	T	G	-0.0840902	-0.011	0.443855	FALSE	FALSE	FALSE	3004_67_PDCD1LG2_PD_L2	0.008226	0.181155	35373	chr11	76043576	0.0173866	1.34785e-06	7171	11	76043576	GCST90277249	2	1	TRUE
21	rs6761859	A	G	A	G	0.253125	0.0236	0.0245545	FALSE	FALSE	FALSE	3004_67_PDCD1LG2_PD_L2	0.024162	0.328696	35363	chr2	173386140	0.0562926	7.00874e-06	7171	2	173386140	GCST90277249	2	1	TRUE
22	rs685850	G	A	G	A	0.0834062	-0.0034	0.556502	FALSE	FALSE	FALSE	3004_67_PDCD1LG2_PD_L2	0.007943	0.668634	35363	chr15	53459505	0.0167976	7.00648e-07	7171	15	53459505	GCST90277249	2	1	TRUE
23	rs7020	A	G	A	G	0.0851994	0.0044	0.445783	FALSE	FALSE	FALSE	3004_67_PDCD1LG2_PD_L2	0.008138	0.588746	35365	chr20	25297964	0.0168912	4.66628e-07	7171	20	25297964	GCST90277249	2	1	TRUE
24	rs7036889	C	A	C	A	-0.134281	-0.0008	0.0907793	FALSE	FALSE	FALSE	3004_67_PDCD1LG2_PD_L2	0.013501	0.952749	35370	chr9	132336145	0.029493	5.37239e-06	7171	9	132336145	GCST90277249	2	1	TRUE
25	rs7412	T	C	T	C	-0.20265	0.0458	0.053066	FALSE	FALSE	FALSE	3004_67_PDCD1LG2_PD_L2	0.017065	0.007277	35367	chr19	44908822	0.0372936	5.68818e-08	7171	19	44908822	GCST90277249	2	1	TRUE
26	rs77645768	A	G	A	G	0.272022	-0.015	0.0255539	FALSE	FALSE	FALSE	3004_67_PDCD1LG2_PD_L2	0.028929	0.604102	35351	chr4	72803111	0.0538033	4.38557e-07	7171	4	72803111	GCST90277249	2	1	TRUE
27	rs79047909	G	C	G	C	-0.515874	0.0413	0.00622502	FALSE	TRUE	TRUE	3004_67_PDCD1LG2_PD_L2	0.037466	0.270314	35369	chr2	10043013	0.10675	1.37507e-06	7171	2	10043013	GCST90277249	2	1	FALSE
28	rs79146711	T	C	T	C	0.186384	-0.0137	0.0451481	FALSE	FALSE	FALSE	3004_67_PDCD1LG2_PD_L2	0.030984	0.658369	35355	chr4	73424911	0.0409628	5.44536e-06	7171	4	73424911	GCST90277249	2	1	TRUE
29	rs79771052	G	A	G	A	0.391774	0.0553	0.0120378	FALSE	FALSE	FALSE	3004_67_PDCD1LG2_PD_L2	0.031223	0.076536	35348	chr3	72433728	0.0807417	1.24544e-06	7171	3	72433728	GCST90277249	2	1	TRUE
30	rs80325645	C	T	C	T	-0.464751	0.0304	0.00778947	FALSE	FALSE	FALSE	3004_67_PDCD1LG2_PD_L2	0.04026	0.450199	35370	chr9	131892383	0.096589	1.52637e-06	7171	9	131892383	GCST90277249	2	1	TRUE
31	rs9310455	A	C	A	C	-0.152094	0.0074	0.066753	FALSE	FALSE	FALSE	3004_67_PDCD1LG2_PD_L2	0.021212	0.72719	35369	chr3	14644646	0.0335736	5.98519e-06	7171	3	14644646	GCST90277249	2	1	TRUE
32	rs111575978	A	G	A	G	0.289062	-0.0116	0.0213174	FALSE	FALSE	FALSE	3234_23_CCDC80_URB	0.038012	0.760238	35366	chr14	46693947	0.0589725	9.70419e-07	7171	14	46693947	GCST90277249	2	1	TRUE
33	rs112478356	C	G	C	G	0.315808	-0.0118	0.0172375	FALSE	TRUE	TRUE	3234_23_CCDC80_URB	0.024981	0.636676	35365	chr2	173688057	0.0667789	2.29427e-06	7171	2	173688057	GCST90277249	2	1	FALSE
34	rs1135999	G	A	G	A	-0.22595	0.0086	0.315252	FALSE	FALSE	FALSE	3234_23_CCDC80_URB	0.009362	0.35829	35379	chr16	15038105	0.0178214	1.90035e-36	7171	16	15038105	GCST90277249	2	1	TRUE
35	rs116917626	T	C	T	C	-0.238479	0.0194	0.0275072	FALSE	FALSE	FALSE	3234_23_CCDC80_URB	0.027908	0.486961	35362	chr17	51561964	0.0525076	5.65998e-06	7171	17	51561964	GCST90277249	2	1	TRUE
36	rs117079226	A	G	A	G	0.375644	-0.0261	0.0114766	FALSE	FALSE	FALSE	3234_23_CCDC80_URB	0.046533	0.574867	35368	chr9	109704483	0.0779374	1.46571e-06	7171	9	109704483	GCST90277249	2	1	TRUE
37	rs117754141	G	C	G	C	0.291278	-0.01	0.0226497	FALSE	TRUE	TRUE	3234_23_CCDC80_URB	0.025222	0.691751	35375	chr6	109151613	0.0597714	1.1206e-06	7171	6	109151613	GCST90277249	2	1	FALSE
38	rs1428498	G	A	G	A	-0.0812374	-0.0058	0.350825	FALSE	FALSE	FALSE	3234_23_CCDC80_URB	0.009158	0.526539	35381	chr5	38698557	0.0172354	2.47985e-06	7171	5	38698557	GCST90277249	2	1	TRUE
39	rs144665282	T	C	T	C	-0.193681	0.001	0.0411693	FALSE	FALSE	FALSE	3234_23_CCDC80_URB	0.024045	0.966827	35022	chr17	82588500	0.0428763	6.36475e-06	7171	17	82588500	GCST90277249	2	1	TRUE
40	rs1800961	T	C	T	C	-0.23874	-0.0253	0.0524109	FALSE	FALSE	FALSE	3234_23_CCDC80_URB	0.019693	0.198879	35371	chr20	44413724	0.0372471	1.54881e-10	7171	20	44413724	GCST90277249	2	1	TRUE
41	rs182695896	C	A	C	A	0.28512	-0.0541	0.025305	FALSE	FALSE	FALSE	3234_23_CCDC80_URB	0.062384	0.385829	35351	chr4	73947510	0.0530713	8.00964e-08	7171	4	73947510	GCST90277249	2	1	TRUE
42	rs187429064	G	A	G	A	-0.235892	-0.0379	0.0535314	FALSE	FALSE	FALSE	3234_23_CCDC80_URB	0.052577	0.471006	35353	chr19	19269704	0.0378639	4.92004e-10	7171	19	19269704	GCST90277249	2	1	TRUE
43	rs2352991	G	A	G	A	-0.088946	-0.0034	0.73476	FALSE	FALSE	FALSE	3234_23_CCDC80_URB	0.009102	0.708746	35372	chr14	95283517	0.0191861	3.61402e-06	7171	14	95283517	GCST90277249	2	1	TRUE
44	rs2727271	T	A	T	A	-0.170476	-0.0027	0.257859	FALSE	TRUE	TRUE	3234_23_CCDC80_URB	0.011155	0.808749	35367	chr11	61835886	0.0190212	3.9811e-19	7171	11	61835886	GCST90277249	2	1	FALSE
45	rs3752149	C	A	C	A	-0.0915318	0.0033	0.258644	FALSE	FALSE	FALSE	3234_23_CCDC80_URB	0.009623	0.731641	35384	chr19	15729265	0.0193371	2.24765e-06	7171	19	15729265	GCST90277249	2	1	TRUE
46	rs4977342	G	C	CG	CC	-0.0931473	-0.0018	0.25096	TRUE	TRUE	TRUE	3234_23_CCDC80_URB	0.008485	0.831991	35363	chr9	19882241	0.0197571	2.46524e-06	7171	9	19882242	GCST90277249	2	1	FALSE
47	rs530804537	A	G	A	G	-0.244913	-0.0426	0.0419602	FALSE	FALSE	FALSE	3234_23_CCDC80_URB	0.032377	0.188263	35365	chr1	55117537	0.041657	4.30519e-09	7171	1	55117537	GCST90277249	2	1	TRUE
48	rs56374730	G	T	G	T	0.11198	-0.0098	0.296257	FALSE	FALSE	FALSE	3234_23_CCDC80_URB	0.009321	0.293098	35381	chr16	15773795	0.0183708	1.14556e-09	7171	16	15773795	GCST90277249	2	1	TRUE
49	rs570929	C	G	C	G	-0.0819763	-0.004	0.548187	FALSE	TRUE	TRUE	3234_23_CCDC80_URB	0.008132	0.622785	35352	chr11	88318708	0.0167238	9.70433e-07	7171	11	88318708	GCST90277249	2	1	FALSE
50	rs62217148	T	C	TCAAAGGGACA	TCAAAGGGGCA	-0.19515	0.0012	0.0488087	TRUE	FALSE	FALSE	3234_23_CCDC80_URB	0.024313	0.960636	35372	chr20	18988564	0.0404522	1.43357e-06	7171	20	18988572	GCST90277249	2	1	FALSE
51	rs624605	T	G	T	G	-0.0840902	-0.0067	0.443855	FALSE	FALSE	FALSE	3234_23_CCDC80_URB	0.008309	0.420034	35373	chr11	76043576	0.0173866	1.34785e-06	7171	11	76043576	GCST90277249	2	1	TRUE
52	rs6761859	A	G	A	G	0.253125	0.0405	0.0245545	FALSE	FALSE	FALSE	3234_23_CCDC80_URB	0.024471	0.097927	35363	chr2	173386140	0.0562926	7.00874e-06	7171	2	173386140	GCST90277249	2	1	TRUE
53	rs685850	G	A	G	A	0.0834062	-0.0044	0.556502	FALSE	FALSE	FALSE	3234_23_CCDC80_URB	0.008255	0.594021	35363	chr15	53459505	0.0167976	7.00648e-07	7171	15	53459505	GCST90277249	2	1	TRUE
54	rs7020	A	G	A	G	0.0851994	0.0131	0.445783	FALSE	FALSE	FALSE	3234_23_CCDC80_URB	0.008293	0.114171	35365	chr20	25297964	0.0168912	4.66628e-07	7171	20	25297964	GCST90277249	2	1	TRUE
55	rs7036889	C	A	C	A	-0.134281	-0.0106	0.0907793	FALSE	FALSE	FALSE	3234_23_CCDC80_URB	0.01382	0.44309	35370	chr9	132336145	0.029493	5.37239e-06	7171	9	132336145	GCST90277249	2	1	TRUE
56	rs7412	T	C	T	C	-0.20265	0.0749	0.053066	FALSE	FALSE	FALSE	3234_23_CCDC80_URB	0.017284	1.467e-05	35367	chr19	44908822	0.0372936	5.68818e-08	7171	19	44908822	GCST90277249	2	1	TRUE
57	rs77645768	A	G	A	G	0.272022	-0.0314	0.0255539	FALSE	FALSE	FALSE	3234_23_CCDC80_URB	0.02928	0.283543	35351	chr4	72803111	0.0538033	4.38557e-07	7171	4	72803111	GCST90277249	2	1	TRUE
58	rs79047909	G	C	G	C	-0.515874	-0.007	0.00622502	FALSE	TRUE	TRUE	3234_23_CCDC80_URB	0.037959	0.853693	35369	chr2	10043013	0.10675	1.37507e-06	7171	2	10043013	GCST90277249	2	1	FALSE
59	rs79146711	T	C	T	C	0.186384	-0.0383	0.0451481	FALSE	FALSE	FALSE	3234_23_CCDC80_URB	0.031513	0.224228	35355	chr4	73424911	0.0409628	5.44536e-06	7171	4	73424911	GCST90277249	2	1	TRUE
60	rs79771052	G	A	G	A	0.391774	0.0477	0.0120378	FALSE	FALSE	FALSE	3234_23_CCDC80_URB	0.031558	0.130659	35348	chr3	72433728	0.0807417	1.24544e-06	7171	3	72433728	GCST90277249	2	1	TRUE
61	rs80325645	C	T	C	T	-0.464751	0.0144	0.00778947	FALSE	FALSE	FALSE	3234_23_CCDC80_URB	0.040534	0.722395	35370	chr9	131892383	0.096589	1.52637e-06	7171	9	131892383	GCST90277249	2	1	TRUE
62	rs9310455	A	C	A	C	-0.152094	-0.0161	0.066753	FALSE	FALSE	FALSE	3234_23_CCDC80_URB	0.0214	0.451842	35369	chr3	14644646	0.0335736	5.98519e-06	7171	3	14644646	GCST90277249	2	1	TRUE
63	rs111575978	A	G	A	G	0.289062	-0.0018	0.0213174	FALSE	FALSE	FALSE	6605_17_IGFALS_IGFALS	0.037157	0.961363	35366	chr14	46693947	0.0589725	9.70419e-07	7171	14	46693947	GCST90277249	2	1	TRUE
64	rs112478356	C	G	C	G	0.315808	-0.027	0.0172375	FALSE	TRUE	TRUE	6605_17_IGFALS_IGFALS	0.024941	0.279003	35365	chr2	173688057	0.0667789	2.29427e-06	7171	2	173688057	GCST90277249	2	1	FALSE
65	rs1135999	G	A	G	A	-0.22595	0.0055	0.315252	FALSE	FALSE	FALSE	6605_17_IGFALS_IGFALS	0.009368	0.557143	35379	chr16	15038105	0.0178214	1.90035e-36	7171	16	15038105	GCST90277249	2	1	TRUE
66	rs116917626	T	C	T	C	-0.238479	0.0132	0.0275072	FALSE	FALSE	FALSE	6605_17_IGFALS_IGFALS	0.027847	0.635488	35362	chr17	51561964	0.0525076	5.65998e-06	7171	17	51561964	GCST90277249	2	1	TRUE
67	rs117079226	A	G	A	G	0.375644	-0.0504	0.0114766	FALSE	FALSE	FALSE	6605_17_IGFALS_IGFALS	0.046431	0.277713	35368	chr9	109704483	0.0779374	1.46571e-06	7171	9	109704483	GCST90277249	2	1	TRUE
68	rs117754141	G	C	G	C	0.291278	0.0434	0.0226497	FALSE	TRUE	TRUE	6605_17_IGFALS_IGFALS	0.025261	0.08579	35375	chr6	109151613	0.0597714	1.1206e-06	7171	6	109151613	GCST90277249	2	1	FALSE
69	rs1428498	G	A	G	A	-0.0812374	0.0111	0.350825	FALSE	FALSE	FALSE	6605_17_IGFALS_IGFALS	0.009072	0.221104	35381	chr5	38698557	0.0172354	2.47985e-06	7171	5	38698557	GCST90277249	2	1	TRUE
70	rs144665282	T	C	T	C	-0.193681	-0.0151	0.0411693	FALSE	FALSE	FALSE	6605_17_IGFALS_IGFALS	0.023782	0.525471	35022	chr17	82588500	0.0428763	6.36475e-06	7171	17	82588500	GCST90277249	2	1	TRUE
71	rs1800961	T	C	T	C	-0.23874	-0.0526	0.0524109	FALSE	FALSE	FALSE	6605_17_IGFALS_IGFALS	0.019631	0.007374	35371	chr20	44413724	0.0372471	1.54881e-10	7171	20	44413724	GCST90277249	2	1	TRUE
72	rs182695896	C	A	C	A	0.28512	0.0347	0.025305	FALSE	FALSE	FALSE	6605_17_IGFALS_IGFALS	0.062283	0.577438	35351	chr4	73947510	0.0530713	8.00964e-08	7171	4	73947510	GCST90277249	2	1	TRUE
73	rs187429064	G	A	G	A	-0.235892	-0.0615	0.0535314	FALSE	FALSE	FALSE	6605_17_IGFALS_IGFALS	0.052383	0.240379	35353	chr19	19269704	0.0378639	4.92004e-10	7171	19	19269704	GCST90277249	2	1	TRUE
74	rs2352991	G	A	G	A	-0.088946	-0.0007	0.73476	FALSE	FALSE	FALSE	6605_17_IGFALS_IGFALS	0.009308	0.940051	35372	chr14	95283517	0.0191861	3.61402e-06	7171	14	95283517	GCST90277249	2	1	TRUE
75	rs2727271	T	A	T	A	-0.170476	-0.0021	0.257859	FALSE	TRUE	TRUE	6605_17_IGFALS_IGFALS	0.011228	0.851638	35367	chr11	61835886	0.0190212	3.9811e-19	7171	11	61835886	GCST90277249	2	1	FALSE
76	rs3752149	C	A	C	A	-0.0915318	0.0109	0.258644	FALSE	FALSE	FALSE	6605_17_IGFALS_IGFALS	0.009435	0.247963	35384	chr19	15729265	0.0193371	2.24765e-06	7171	19	15729265	GCST90277249	2	1	TRUE
77	rs4977342	G	C	CG	CC	-0.0931473	0.0032	0.25096	TRUE	TRUE	TRUE	6605_17_IGFALS_IGFALS	0.00856	0.708517	35363	chr9	19882241	0.0197571	2.46524e-06	7171	9	19882242	GCST90277249	2	1	FALSE
78	rs530804537	A	G	A	G	-0.244913	-0.0539	0.0419602	FALSE	FALSE	FALSE	6605_17_IGFALS_IGFALS	0.032325	0.095431	35365	chr1	55117537	0.041657	4.30519e-09	7171	1	55117537	GCST90277249	2	1	TRUE
79	rs56374730	G	T	G	T	0.11198	-0.0032	0.296257	FALSE	FALSE	FALSE	6605_17_IGFALS_IGFALS	0.009376	0.732872	35381	chr16	15773795	0.0183708	1.14556e-09	7171	16	15773795	GCST90277249	2	1	TRUE
80	rs570929	C	G	C	G	-0.0819763	-0.0037	0.548187	FALSE	TRUE	TRUE	6605_17_IGFALS_IGFALS	0.008234	0.653177	35352	chr11	88318708	0.0167238	9.70433e-07	7171	11	88318708	GCST90277249	2	1	FALSE
81	rs62217148	T	C	TCAAAGGGACA	TCAAAGGGGCA	-0.19515	-0.0033	0.0488087	TRUE	FALSE	FALSE	6605_17_IGFALS_IGFALS	0.023574	0.888671	35372	chr20	18988564	0.0404522	1.43357e-06	7171	20	18988572	GCST90277249	2	1	FALSE
82	rs624605	T	G	T	G	-0.0840902	-0.0032	0.443855	FALSE	FALSE	FALSE	6605_17_IGFALS_IGFALS	0.008293	0.699601	35373	chr11	76043576	0.0173866	1.34785e-06	7171	11	76043576	GCST90277249	2	1	TRUE
83	rs6761859	A	G	A	G	0.253125	-0.0009	0.0245545	FALSE	FALSE	FALSE	6605_17_IGFALS_IGFALS	0.025742	0.97211	35363	chr2	173386140	0.0562926	7.00874e-06	7171	2	173386140	GCST90277249	2	1	TRUE
84	rs685850	G	A	G	A	0.0834062	0.0024	0.556502	FALSE	FALSE	FALSE	6605_17_IGFALS_IGFALS	0.008075	0.766314	35363	chr15	53459505	0.0167976	7.00648e-07	7171	15	53459505	GCST90277249	2	1	TRUE
85	rs7020	A	G	A	G	0.0851994	-0.0048	0.445783	FALSE	FALSE	FALSE	6605_17_IGFALS_IGFALS	0.008331	0.564512	35365	chr20	25297964	0.0168912	4.66628e-07	7171	20	25297964	GCST90277249	2	1	TRUE
86	rs7036889	C	A	C	A	-0.134281	-0.0097	0.0907793	FALSE	FALSE	FALSE	6605_17_IGFALS_IGFALS	0.01376	0.480844	35370	chr9	132336145	0.029493	5.37239e-06	7171	9	132336145	GCST90277249	2	1	TRUE
87	rs7412	T	C	T	C	-0.20265	0.0272	0.053066	FALSE	FALSE	FALSE	6605_17_IGFALS_IGFALS	0.017245	0.114733	35367	chr19	44908822	0.0372936	5.68818e-08	7171	19	44908822	GCST90277249	2	1	TRUE
88	rs77645768	A	G	A	G	0.272022	-0.0415	0.0255539	FALSE	FALSE	FALSE	6605_17_IGFALS_IGFALS	0.029184	0.155023	35351	chr4	72803111	0.0538033	4.38557e-07	7171	4	72803111	GCST90277249	2	1	TRUE
89	rs79047909	G	C	G	C	-0.515874	0.031	0.00622502	FALSE	TRUE	TRUE	6605_17_IGFALS_IGFALS	0.037832	0.412557	35369	chr2	10043013	0.10675	1.37507e-06	7171	2	10043013	GCST90277249	2	1	FALSE
90	rs79146711	T	C	T	C	0.186384	0.0029	0.0451481	FALSE	FALSE	FALSE	6605_17_IGFALS_IGFALS	0.031031	0.925541	35355	chr4	73424911	0.0409628	5.44536e-06	7171	4	73424911	GCST90277249	2	1	TRUE
91	rs79771052	G	A	G	A	0.391774	-0.007	0.0120378	FALSE	FALSE	FALSE	6605_17_IGFALS_IGFALS	0.031485	0.824059	35348	chr3	72433728	0.0807417	1.24544e-06	7171	3	72433728	GCST90277249	2	1	TRUE
92	rs80325645	C	T	C	T	-0.464751	0.0078	0.00778947	FALSE	FALSE	FALSE	6605_17_IGFALS_IGFALS	0.040461	0.847133	35370	chr9	131892383	0.096589	1.52637e-06	7171	9	131892383	GCST90277249	2	1	TRUE
93	rs9310455	A	C	A	C	-0.152094	0.0128	0.066753	FALSE	FALSE	FALSE	6605_17_IGFALS_IGFALS	0.021296	0.547804	35369	chr3	14644646	0.0335736	5.98519e-06	7171	3	14644646	GCST90277249	2	1	TRUE
	SNP	effect_allele.exposure	other_allele.exposure	effect_allele.outcome	other_allele.outcome	beta.exposure	beta.outcome	eaf.exposure	remove	palindromic	ambiguous	id.outcome	se.outcome	pval.outcome	samplesize.outcome	chr.outcome	pos.outcome	se.exposure	pval.exposure	samplesize.exposure	chr.exposure	pos.exposure	exposure	action	SNP_index	mr_keep
1	rs10033592	G	T	G	T	-0.0821246	-0.005	0.655299	FALSE	FALSE	FALSE	3004_67_PDCD1LG2_PD_L2	0.008631	0.562364	35361	chr4	40237784	0.0176572	3.35918e-06	7174	4	40237784	GCST90277255	2	1	TRUE
2	rs10201832	T	A	T	A	0.262126	0.0533	0.0214135	FALSE	TRUE	TRUE	3004_67_PDCD1LG2_PD_L2	0.049637	0.282918	35353	chr2	62042163	0.0584095	7.30621e-06	7174	2	62042163	GCST90277255	2	1	FALSE
3	rs11105228	A	G	A	G	-0.085957	0.0108	0.337067	FALSE	FALSE	FALSE	3004_67_PDCD1LG2_PD_L2	0.009232	0.242065	35357	chr12	89259912	0.0176409	1.12504e-06	7174	12	89259912	GCST90277255	2	1	TRUE
4	rs11130463	C	A	C	A	0.115441	0.0162	0.881307	FALSE	FALSE	FALSE	3004_67_PDCD1LG2_PD_L2	0.01155	0.160743	35352	chr3	55192986	0.0258876	8.34951e-06	7174	3	55192986	GCST90277255	2	1	TRUE
5	rs112631157	T	C	T	C	-0.53841	0.0382	0.00597336	FALSE	FALSE	FALSE	3004_67_PDCD1LG2_PD_L2	0.02673	0.152981	35378	chr8	17632332	0.120018	7.36685e-06	7174	8	17632332	GCST90277255	2	1	TRUE
6	rs114822153	A	G	A	G	0.237444	0.0154	0.0296179	FALSE	FALSE	FALSE	3004_67_PDCD1LG2_PD_L2	0.022914	0.501527	35348	chr4	72372827	0.0509524	3.21224e-06	7174	4	72372827	GCST90277255	2	1	TRUE
7	rs114910162	T	C	T	C	0.185799	-0.0171	0.0494759	FALSE	FALSE	FALSE	3004_67_PDCD1LG2_PD_L2	0.015786	0.2787	35354	chr2	141867363	0.0397446	2.99249e-06	7174	2	141867363	GCST90277255	2	1	TRUE
8	rs117888980	G	T	G	T	-0.29441	0.0108	0.0185533	FALSE	FALSE	FALSE	3004_67_PDCD1LG2_PD_L2	0.029824	0.717262	35373	chr9	107021609	0.0636033	3.73973e-06	7174	9	107021609	GCST90277255	2	1	TRUE
9	rs1260326	C	T	C	T	-0.088831	0.0077	0.650878	FALSE	FALSE	FALSE	3004_67_PDCD1LG2_PD_L2	0.008553	0.367966	35373	chr2	27508073	0.017446	3.63576e-07	7174	2	27508073	GCST90277255	2	1	TRUE
10	rs12927793	A	G	A	G	-0.078516	-0.005	0.529955	FALSE	FALSE	FALSE	3004_67_PDCD1LG2_PD_L2	0.008203	0.542156	35323	chr16	89171782	0.016616	2.34225e-06	7174	16	89171782	GCST90277255	2	1	TRUE
11	rs186176314	C	T	C	T	0.26929	-0.0072	0.0225114	FALSE	FALSE	FALSE	3004_67_PDCD1LG2_PD_L2	0.025682	0.779206	35370	chr5	16573000	0.057719	3.13192e-06	7174	5	16573000	GCST90277255	2	1	TRUE
12	rs2236124	C	T	C	T	0.148192	-0.0186	0.146373	FALSE	FALSE	FALSE	3004_67_PDCD1LG2_PD_L2	0.012103	0.124345	35380	chr20	13126078	0.0233976	2.53305e-10	7174	20	13126078	GCST90277255	2	1	TRUE
13	rs28505920	A	T	A	T	0.101162	-0.0143	0.171403	FALSE	TRUE	TRUE	3004_67_PDCD1LG2_PD_L2	0.009991	0.152364	35365	chr8	118268727	0.0222551	5.56586e-06	7174	8	118268727	GCST90277255	2	1	FALSE
14	rs2945048	A	T	A	T	0.0925624	0.0025	0.240793	FALSE	TRUE	TRUE	3004_67_PDCD1LG2_PD_L2	0.011727	0.831189	35375	chr19	38556464	0.0194051	1.87822e-06	7174	19	38556464	GCST90277255	2	1	FALSE
15	rs364585	G	A	G	A	-0.222717	-0.0035	0.66136	FALSE	FALSE	FALSE	3004_67_PDCD1LG2_PD_L2	0.008002	0.66183	35381	chr20	12982070	0.0174419	6.10811e-37	7174	20	12982070	GCST90277255	2	1	TRUE
16	rs3923037	C	A	C	A	-0.0770068	0.0001	0.392798	FALSE	FALSE	FALSE	3004_67_PDCD1LG2_PD_L2	0.006393	0.98752	35372	chr2	20948514	0.0169397	5.5542e-06	7174	2	20948514	GCST90277255	2	1	TRUE
17	rs56368930	C	G	C	G	0.37973	0.0519	0.012375	FALSE	TRUE	TRUE	3004_67_PDCD1LG2_PD_L2	0.034349	0.130796	35353	chr14	33070106	0.0826758	4.44148e-06	7174	14	33070106	GCST90277255	2	1	FALSE
18	rs57099041	T	C	T	C	0.15444	-0.0313	0.0640638	FALSE	FALSE	FALSE	3004_67_PDCD1LG2_PD_L2	0.036878	0.396026	35367	chr4	175907374	0.0339572	5.49592e-06	7174	4	175907374	GCST90277255	2	1	TRUE
19	rs62621917	C	T	C	T	0.568908	-0.0142	0.00485169	FALSE	FALSE	FALSE	3004_67_PDCD1LG2_PD_L2	0.03478	0.683068	35363	chr1	114581582	0.128125	9.11631e-06	7174	1	114581582	GCST90277255	2	1	TRUE
20	rs6977389	A	G	A	G	-0.0777708	-0.0057	0.560349	FALSE	FALSE	FALSE	3004_67_PDCD1LG2_PD_L2	0.008037	0.478205	35349	chr7	95390043	0.0168713	4.10344e-06	7174	7	95390043	GCST90277255	2	1	TRUE
21	rs7123454	A	C	A	C	-0.110975	0.0188	0.811496	FALSE	FALSE	FALSE	3004_67_PDCD1LG2_PD_L2	0.011066	0.089328	35377	chr11	116833462	0.021605	2.86814e-07	7174	11	116833462	GCST90277255	2	1	TRUE
22	rs7252628	A	G	A	G	0.0841486	-0.0144	0.30308	FALSE	FALSE	FALSE	3004_67_PDCD1LG2_PD_L2	0.010452	0.168268	35340	chr19	18958653	0.0190353	9.97638e-06	7174	19	18958653	GCST90277255	2	1	TRUE
23	rs72941422	C	T	C	T	0.0837634	0.0053	0.277158	FALSE	FALSE	FALSE	3004_67_PDCD1LG2_PD_L2	0.009178	0.56364	35361	chr4	131441209	0.0185687	6.55055e-06	7174	4	131441209	GCST90277255	2	1	TRUE
24	rs72954979	A	G	A	G	-0.20877	-0.0092	0.0338385	FALSE	FALSE	FALSE	3004_67_PDCD1LG2_PD_L2	0.020156	0.64808	35356	chr18	71270815	0.0466583	7.77229e-06	7174	18	71270815	GCST90277255	2	1	TRUE
25	rs78573518	G	A	G	A	-0.500131	0.0222	0.00678459	FALSE	FALSE	FALSE	3004_67_PDCD1LG2_PD_L2	0.025139	0.37719	35363	chr2	200379367	0.107554	3.37676e-06	7174	2	200379367	GCST90277255	2	1	TRUE
26	rs7970512	A	C	A	C	-0.211977	0.0294	0.0349783	FALSE	FALSE	FALSE	3004_67_PDCD1LG2_PD_L2	0.045118	0.514643	35359	chr12	67513820	0.0478469	9.54064e-06	7174	12	67513820	GCST90277255	2	1	TRUE
27	rs8100204	A	G	A	G	-0.166109	-0.0068	0.170713	FALSE	FALSE	FALSE	3004_67_PDCD1LG2_PD_L2	0.011507	0.554562	35353	chr19	19282905	0.0223854	1.29409e-13	7174	19	19282905	GCST90277255	2	1	TRUE
28	rs10033592	G	T	G	T	-0.0821246	0.0086	0.655299	FALSE	FALSE	FALSE	3234_23_CCDC80_URB	0.008656	0.320463	35361	chr4	40237784	0.0176572	3.35918e-06	7174	4	40237784	GCST90277255	2	1	TRUE
29	rs10201832	T	A	T	A	0.262126	0.0945	0.0214135	FALSE	TRUE	TRUE	3234_23_CCDC80_URB	0.050314	0.060354	35353	chr2	62042163	0.0584095	7.30621e-06	7174	2	62042163	GCST90277255	2	1	FALSE
30	rs11105228	A	G	A	G	-0.085957	-0.0014	0.337067	FALSE	FALSE	FALSE	3234_23_CCDC80_URB	0.009504	0.882893	35357	chr12	89259912	0.0176409	1.12504e-06	7174	12	89259912	GCST90277255	2	1	TRUE
31	rs11130463	C	A	C	A	0.115441	-0.0015	0.881307	FALSE	FALSE	FALSE	3234_23_CCDC80_URB	0.011922	0.899874	35352	chr3	55192986	0.0258876	8.34951e-06	7174	3	55192986	GCST90277255	2	1	TRUE
32	rs112631157	T	C	T	C	-0.53841	0.0272	0.00597336	FALSE	FALSE	FALSE	3234_23_CCDC80_URB	0.02717	0.316771	35378	chr8	17632332	0.120018	7.36685e-06	7174	8	17632332	GCST90277255	2	1	TRUE
33	rs114822153	A	G	A	G	0.237444	-0.0246	0.0296179	FALSE	FALSE	FALSE	3234_23_CCDC80_URB	0.023179	0.288541	35348	chr4	72372827	0.0509524	3.21224e-06	7174	4	72372827	GCST90277255	2	1	TRUE
34	rs114910162	T	C	T	C	0.185799	-0.0029	0.0494759	FALSE	FALSE	FALSE	3234_23_CCDC80_URB	0.016013	0.856289	35354	chr2	141867363	0.0397446	2.99249e-06	7174	2	141867363	GCST90277255	2	1	TRUE
35	rs117888980	G	T	G	T	-0.29441	0.0108	0.0185533	FALSE	FALSE	FALSE	3234_23_CCDC80_URB	0.029856	0.71755	35373	chr9	107021609	0.0636033	3.73973e-06	7174	9	107021609	GCST90277255	2	1	TRUE
36	rs1260326	C	T	C	T	-0.088831	0.0251	0.650878	FALSE	FALSE	FALSE	3234_23_CCDC80_URB	0.008675	0.003811	35373	chr2	27508073	0.017446	3.63576e-07	7174	2	27508073	GCST90277255	2	1	TRUE
37	rs12927793	A	G	A	G	-0.078516	0.0038	0.529955	FALSE	FALSE	FALSE	3234_23_CCDC80_URB	0.008412	0.65145	35323	chr16	89171782	0.016616	2.34225e-06	7174	16	89171782	GCST90277255	2	1	TRUE
38	rs186176314	C	T	C	T	0.26929	-0.0121	0.0225114	FALSE	FALSE	FALSE	3234_23_CCDC80_URB	0.025837	0.639549	35370	chr5	16573000	0.057719	3.13192e-06	7174	5	16573000	GCST90277255	2	1	TRUE
39	rs2236124	C	T	C	T	0.148192	-0.0221	0.146373	FALSE	FALSE	FALSE	3234_23_CCDC80_URB	0.012285	0.072022	35380	chr20	13126078	0.0233976	2.53305e-10	7174	20	13126078	GCST90277255	2	1	TRUE
40	rs28505920	A	T	A	T	0.101162	-0.0088	0.171403	FALSE	TRUE	TRUE	3234_23_CCDC80_URB	0.010126	0.384811	35365	chr8	118268727	0.0222551	5.56586e-06	7174	8	118268727	GCST90277255	2	1	FALSE
41	rs2945048	A	T	A	T	0.0925624	0.0129	0.240793	FALSE	TRUE	TRUE	3234_23_CCDC80_URB	0.011644	0.267917	35375	chr19	38556464	0.0194051	1.87822e-06	7174	19	38556464	GCST90277255	2	1	FALSE
42	rs364585	G	A	G	A	-0.222717	0.0026	0.66136	FALSE	FALSE	FALSE	3234_23_CCDC80_URB	0.008082	0.747681	35381	chr20	12982070	0.0174419	6.10811e-37	7174	20	12982070	GCST90277255	2	1	TRUE
43	rs3923037	C	A	C	A	-0.0770068	0.0076	0.392798	FALSE	FALSE	FALSE	3234_23_CCDC80_URB	0.00842	0.366734	35372	chr2	20948514	0.0169397	5.5542e-06	7174	2	20948514	GCST90277255	2	1	TRUE
44	rs56368930	C	G	C	G	0.37973	0.0452	0.012375	FALSE	TRUE	TRUE	3234_23_CCDC80_URB	0.034796	0.19394	35353	chr14	33070106	0.0826758	4.44148e-06	7174	14	33070106	GCST90277255	2	1	FALSE
45	rs57099041	T	C	T	C	0.15444	-0.0544	0.0640638	FALSE	FALSE	FALSE	3234_23_CCDC80_URB	0.037355	0.14531	35367	chr4	175907374	0.0339572	5.49592e-06	7174	4	175907374	GCST90277255	2	1	TRUE
46	rs62621917	C	T	C	T	0.568908	-0.0358	0.00485169	FALSE	FALSE	FALSE	3234_23_CCDC80_URB	0.035298	0.310481	35363	chr1	114581582	0.128125	9.11631e-06	7174	1	114581582	GCST90277255	2	1	TRUE
47	rs6977389	A	G	A	G	-0.0777708	0.0052	0.560349	FALSE	FALSE	FALSE	3234_23_CCDC80_URB	0.008253	0.528627	35349	chr7	95390043	0.0168713	4.10344e-06	7174	7	95390043	GCST90277255	2	1	TRUE
48	rs7123454	A	C	A	C	-0.110975	-0.0048	0.811496	FALSE	FALSE	FALSE	3234_23_CCDC80_URB	0.011244	0.669443	35377	chr11	116833462	0.021605	2.86814e-07	7174	11	116833462	GCST90277255	2	1	TRUE
49	rs7252628	A	G	A	G	0.0841486	-0.0041	0.30308	FALSE	FALSE	FALSE	3234_23_CCDC80_URB	0.01051	0.696459	35340	chr19	18958653	0.0190353	9.97638e-06	7174	19	18958653	GCST90277255	2	1	TRUE
50	rs72941422	C	T	C	T	0.0837634	0.0043	0.277158	FALSE	FALSE	FALSE	3234_23_CCDC80_URB	0.009371	0.646335	35361	chr4	131441209	0.0185687	6.55055e-06	7174	4	131441209	GCST90277255	2	1	TRUE
51	rs72954979	A	G	A	G	-0.20877	-0.0073	0.0338385	FALSE	FALSE	FALSE	3234_23_CCDC80_URB	0.020458	0.721222	35356	chr18	71270815	0.0466583	7.77229e-06	7174	18	71270815	GCST90277255	2	1	TRUE
52	rs78573518	G	A	G	A	-0.500131	0.0233	0.00678459	FALSE	FALSE	FALSE	3234_23_CCDC80_URB	0.025472	0.36033	35363	chr2	200379367	0.107554	3.37676e-06	7174	2	200379367	GCST90277255	2	1	TRUE
53	rs7970512	A	C	A	C	-0.211977	-0.0499	0.0349783	FALSE	FALSE	FALSE	3234_23_CCDC80_URB	0.045746	0.275358	35359	chr12	67513820	0.0478469	9.54064e-06	7174	12	67513820	GCST90277255	2	1	TRUE
54	rs8100204	A	G	A	G	-0.166109	0.0049	0.170713	FALSE	FALSE	FALSE	3234_23_CCDC80_URB	0.011803	0.678037	35353	chr19	19282905	0.0223854	1.29409e-13	7174	19	19282905	GCST90277255	2	1	TRUE
55	rs10033592	G	T	G	T	-0.0821246	0.001	0.655299	FALSE	FALSE	FALSE	6605_17_IGFALS_IGFALS	0.008804	0.909569	35361	chr4	40237784	0.0176572	3.35918e-06	7174	4	40237784	GCST90277255	2	1	TRUE
56	rs10201832	T	A	T	A	0.262126	0.0016	0.0214135	FALSE	TRUE	TRUE	6605_17_IGFALS_IGFALS	0.050725	0.974837	35353	chr2	62042163	0.0584095	7.30621e-06	7174	2	62042163	GCST90277255	2	1	FALSE
57	rs11105228	A	G	A	G	-0.085957	-0.0027	0.337067	FALSE	FALSE	FALSE	6605_17_IGFALS_IGFALS	0.009393	0.773775	35357	chr12	89259912	0.0176409	1.12504e-06	7174	12	89259912	GCST90277255	2	1	TRUE
58	rs11130463	C	A	C	A	0.115441	0.0043	0.881307	FALSE	FALSE	FALSE	6605_17_IGFALS_IGFALS	0.011679	0.712742	35352	chr3	55192986	0.0258876	8.34951e-06	7174	3	55192986	GCST90277255	2	1	TRUE
59	rs112631157	T	C	T	C	-0.53841	0.0149	0.00597336	FALSE	FALSE	FALSE	6605_17_IGFALS_IGFALS	0.027062	0.581916	35378	chr8	17632332	0.120018	7.36685e-06	7174	8	17632332	GCST90277255	2	1	TRUE
60	rs114822153	A	G	A	G	0.237444	-0.0055	0.0296179	FALSE	FALSE	FALSE	6605_17_IGFALS_IGFALS	0.023224	0.812793	35348	chr4	72372827	0.0509524	3.21224e-06	7174	4	72372827	GCST90277255	2	1	TRUE
61	rs114910162	T	C	T	C	0.185799	0.0161	0.0494759	FALSE	FALSE	FALSE	6605_17_IGFALS_IGFALS	0.015976	0.313559	35354	chr2	141867363	0.0397446	2.99249e-06	7174	2	141867363	GCST90277255	2	1	TRUE
62	rs117888980	G	T	G	T	-0.29441	0.0008	0.0185533	FALSE	FALSE	FALSE	6605_17_IGFALS_IGFALS	0.029361	0.978263	35373	chr9	107021609	0.0636033	3.73973e-06	7174	9	107021609	GCST90277255	2	1	TRUE
63	rs1260326	C	T	C	T	-0.088831	-0.0331	0.650878	FALSE	FALSE	FALSE	6605_17_IGFALS_IGFALS	0.008638	0.0001271	35373	chr2	27508073	0.017446	3.63576e-07	7174	2	27508073	GCST90277255	2	1	TRUE
64	rs12927793	A	G	A	G	-0.078516	-0.0025	0.529955	FALSE	FALSE	FALSE	6605_17_IGFALS_IGFALS	0.008566	0.770407	35323	chr16	89171782	0.016616	2.34225e-06	7174	16	89171782	GCST90277255	2	1	TRUE
65	rs186176314	C	T	C	T	0.26929	0.0174	0.0225114	FALSE	FALSE	FALSE	6605_17_IGFALS_IGFALS	0.025753	0.499268	35370	chr5	16573000	0.057719	3.13192e-06	7174	5	16573000	GCST90277255	2	1	TRUE
66	rs2236124	C	T	C	T	0.148192	-0.0116	0.146373	FALSE	FALSE	FALSE	6605_17_IGFALS_IGFALS	0.012279	0.344809	35380	chr20	13126078	0.0233976	2.53305e-10	7174	20	13126078	GCST90277255	2	1	TRUE
67	rs28505920	A	T	A	T	0.101162	0.0141	0.171403	FALSE	TRUE	TRUE	6605_17_IGFALS_IGFALS	0.010106	0.162932	35365	chr8	118268727	0.0222551	5.56586e-06	7174	8	118268727	GCST90277255	2	1	FALSE
68	rs2945048	A	T	A	T	0.0925624	-0.0083	0.240793	FALSE	TRUE	TRUE	6605_17_IGFALS_IGFALS	0.011643	0.475925	35375	chr19	38556464	0.0194051	1.87822e-06	7174	19	38556464	GCST90277255	2	1	FALSE
69	rs364585	G	A	G	A	-0.222717	-0.0172	0.66136	FALSE	FALSE	FALSE	6605_17_IGFALS_IGFALS	0.008174	0.035355	35381	chr20	12982070	0.0174419	6.10811e-37	7174	20	12982070	GCST90277255	2	1	TRUE
70	rs3923037	C	A	C	A	-0.0770068	0.0052	0.392798	FALSE	FALSE	FALSE	6605_17_IGFALS_IGFALS	0.008472	0.53935	35372	chr2	20948514	0.0169397	5.5542e-06	7174	2	20948514	GCST90277255	2	1	TRUE
71	rs56368930	C	G	C	G	0.37973	0.0211	0.012375	FALSE	TRUE	TRUE	6605_17_IGFALS_IGFALS	0.034731	0.543498	35353	chr14	33070106	0.0826758	4.44148e-06	7174	14	33070106	GCST90277255	2	1	FALSE
72	rs57099041	T	C	T	C	0.15444	-0.0379	0.0640638	FALSE	FALSE	FALSE	6605_17_IGFALS_IGFALS	0.037246	0.308883	35367	chr4	175907374	0.0339572	5.49592e-06	7174	4	175907374	GCST90277255	2	1	TRUE
73	rs62621917	C	T	C	T	0.568908	-0.0055	0.00485169	FALSE	FALSE	FALSE	6605_17_IGFALS_IGFALS	0.035381	0.876467	35363	chr1	114581582	0.128125	9.11631e-06	7174	1	114581582	GCST90277255	2	1	TRUE
74	rs6977389	A	G	A	G	-0.0777708	-0.006	0.560349	FALSE	FALSE	FALSE	6605_17_IGFALS_IGFALS	0.008127	0.460323	35349	chr7	95390043	0.0168713	4.10344e-06	7174	7	95390043	GCST90277255	2	1	TRUE
75	rs7123454	A	C	A	C	-0.110975	-0.0063	0.811496	FALSE	FALSE	FALSE	6605_17_IGFALS_IGFALS	0.011185	0.57325	35377	chr11	116833462	0.021605	2.86814e-07	7174	11	116833462	GCST90277255	2	1	TRUE
76	rs7252628	A	G	A	G	0.0841486	-0.0104	0.30308	FALSE	FALSE	FALSE	6605_17_IGFALS_IGFALS	0.010547	0.324088	35340	chr19	18958653	0.0190353	9.97638e-06	7174	19	18958653	GCST90277255	2	1	TRUE
77	rs72941422	C	T	C	T	0.0837634	0.0006	0.277158	FALSE	FALSE	FALSE	6605_17_IGFALS_IGFALS	0.008795	0.945608	35361	chr4	131441209	0.0185687	6.55055e-06	7174	4	131441209	GCST90277255	2	1	TRUE
78	rs72954979	A	G	A	G	-0.20877	-0.0295	0.0338385	FALSE	FALSE	FALSE	6605_17_IGFALS_IGFALS	0.020471	0.149569	35356	chr18	71270815	0.0466583	7.77229e-06	7174	18	71270815	GCST90277255	2	1	TRUE
79	rs78573518	G	A	G	A	-0.500131	0.0118	0.00678459	FALSE	FALSE	FALSE	6605_17_IGFALS_IGFALS	0.025317	0.641154	35363	chr2	200379367	0.107554	3.37676e-06	7174	2	200379367	GCST90277255	2	1	TRUE
80	rs7970512	A	C	A	C	-0.211977	-0.0179	0.0349783	FALSE	FALSE	FALSE	6605_17_IGFALS_IGFALS	0.045554	0.694365	35359	chr12	67513820	0.0478469	9.54064e-06	7174	12	67513820	GCST90277255	2	1	TRUE
81	rs8100204	A	G	A	G	-0.166109	-0.0125	0.170713	FALSE	FALSE	FALSE	6605_17_IGFALS_IGFALS	0.011657	0.283591	35353	chr19	19282905	0.0223854	1.29409e-13	7174	19	19282905	GCST90277255	2	1	TRUE
	SNP	effect_allele.exposure	other_allele.exposure	effect_allele.outcome	other_allele.outcome	beta.exposure	beta.outcome	eaf.exposure	remove	palindromic	ambiguous	id.outcome	se.outcome	pval.outcome	samplesize.outcome	chr.outcome	pos.outcome	se.exposure	pval.exposure	samplesize.exposure	chr.exposure	pos.exposure	exposure	action	SNP_index	mr_keep
1	rs10022344	T	C	T	C	0.105672	0.0187	0.180771	FALSE	FALSE	FALSE	3004_67_PDCD1LG2_PD_L2	0.01389	0.178198	35353	chr4	124943164	0.0237049	8.40957e-06	6215	4	124943164	GCST90277260	2	1	TRUE
2	rs10502551	G	C	G	C	-0.212813	0.0039	0.0508576	FALSE	TRUE	TRUE	3004_67_PDCD1LG2_PD_L2	0.017102	0.819611	35345	chr18	30887893	0.0415968	3.21357e-07	6215	18	30887893	GCST90277260	2	1	FALSE
3	rs111750990	C	A	C	A	-0.214278	-0.0205	0.0413621	FALSE	FALSE	FALSE	3004_67_PDCD1LG2_PD_L2	0.017769	0.24862	35362	chr12	96298692	0.0455897	2.65328e-06	6215	12	96298692	GCST90277260	2	1	TRUE
4	rs11182480	C	T	C	T	0.345205	0.0232	0.0177771	FALSE	FALSE	FALSE	3004_67_PDCD1LG2_PD_L2	0.022288	0.297915	35356	chr12	44386579	0.069573	7.1595e-07	6215	12	44386579	GCST90277260	2	1	TRUE
5	rs112122274	G	A	G	A	-0.259929	0.0187	0.0359716	FALSE	FALSE	FALSE	3004_67_PDCD1LG2_PD_L2	0.023037	0.416952	35267	chr9	136257994	0.0525045	7.57659e-07	6215	9	136257994	GCST90277260	2	1	TRUE
6	rs11775636	A	G	A	G	-0.113375	-0.0023	0.15754	FALSE	FALSE	FALSE	3004_67_PDCD1LG2_PD_L2	0.009936	0.816948	35294	chr8	142752432	0.0242701	3.05366e-06	6215	8	142752432	GCST90277260	2	1	TRUE
7	rs117771237	A	C	A	C	0.383805	0.0394	0.0118126	FALSE	FALSE	FALSE	3004_67_PDCD1LG2_PD_L2	0.022839	0.084506	35369	chr22	40189878	0.0853419	7.01652e-06	6215	22	40189878	GCST90277260	2	1	TRUE
8	rs12050879	A	G	A	G	-0.277766	0.0416	0.0208889	FALSE	FALSE	FALSE	3004_67_PDCD1LG2_PD_L2	0.054983	0.449292	35364	chr15	39983732	0.0621538	7.99098e-06	6215	15	39983732	GCST90277260	2	1	TRUE
9	rs1260326	C	T	C	T	-0.11192	0.0077	0.650878	FALSE	FALSE	FALSE	3004_67_PDCD1LG2_PD_L2	0.008553	0.367966	35373	chr2	27508073	0.0186705	2.15261e-09	6215	2	27508073	GCST90277260	2	1	TRUE
10	rs140283718	A	T	A	T	-0.265886	0.0671	0.0256515	FALSE	TRUE	TRUE	3004_67_PDCD1LG2_PD_L2	0.05048	0.183769	35368	chr19	30685856	0.0571052	3.28899e-06	6215	19	30685856	GCST90277260	2	1	FALSE
11	rs143808674	G	A	G	A	-0.186449	-0.0173	0.048035	FALSE	FALSE	FALSE	3004_67_PDCD1LG2_PD_L2	0.018703	0.354965	35356	chr1	81671654	0.0419048	8.76095e-06	6215	1	81671654	GCST90277260	2	1	TRUE
12	rs147782497	A	C	A	C	0.267025	-0.0298	0.0242209	FALSE	FALSE	FALSE	3004_67_PDCD1LG2_PD_L2	0.037706	0.429334	35092	chr18	78352143	0.0601294	9.11019e-06	6215	18	78352143	GCST90277260	2	1	TRUE
13	rs2182380	G	A	G	A	0.260746	0.0136	0.03059	FALSE	FALSE	FALSE	3004_67_PDCD1LG2_PD_L2	0.018274	0.456751	35357	chr6	43900875	0.0543597	1.64945e-06	6215	6	43900875	GCST90277260	2	1	TRUE
14	rs2524075	T	C	T	C	-0.107183	-0.0179	0.208006	FALSE	FALSE	FALSE	3004_67_PDCD1LG2_PD_L2	0.010519	0.088818	35439	chr6	31276082	0.0218188	9.21967e-07	6215	6	31276082	GCST90277260	2	1	TRUE
15	rs3829088	C	T	C	T	0.101769	-0.004	0.202568	FALSE	FALSE	FALSE	3004_67_PDCD1LG2_PD_L2	0.010088	0.691728	35362	chr9	23713682	0.022403	5.65484e-06	6215	9	23713682	GCST90277260	2	1	TRUE
16	rs4788788	A	C	A	C	-0.0932329	0.0048	0.238157	FALSE	FALSE	FALSE	3004_67_PDCD1LG2_PD_L2	0.009277	0.604866	35376	chr16	71305356	0.0210341	9.46926e-06	6215	16	71305356	GCST90277260	2	1	TRUE
17	rs77134026	A	G	A	G	0.257957	-0.0375	0.0306174	FALSE	FALSE	FALSE	3004_67_PDCD1LG2_PD_L2	0.022627	0.097452	35359	chr7	36495127	0.055336	3.20162e-06	6215	7	36495127	GCST90277260	2	1	TRUE
18	rs78263224	C	T	C	T	0.205521	0.0207	0.0434622	FALSE	FALSE	FALSE	3004_67_PDCD1LG2_PD_L2	0.019806	0.295969	35379	chr19	52961172	0.0458816	7.61332e-06	6215	19	52961172	GCST90277260	2	1	TRUE
19	rs7910473	T	C	T	C	0.284781	-0.0134	0.977325	FALSE	FALSE	FALSE	3004_67_PDCD1LG2_PD_L2	0.030878	0.664315	35353	chr10	62379823	0.0610289	3.12792e-06	6215	10	62379823	GCST90277260	2	1	TRUE
20	rs7955732	T	G	T	G	-0.0886008	-0.0051	0.422862	FALSE	FALSE	FALSE	3004_67_PDCD1LG2_PD_L2	0.008188	0.533368	35364	chr12	72331215	0.0182566	1.24412e-06	6215	12	72331215	GCST90277260	2	1	TRUE
21	rs908150	C	T	C	T	0.0807078	0.0034	0.428483	FALSE	FALSE	FALSE	3004_67_PDCD1LG2_PD_L2	0.008211	0.67882	35369	chr17	66540315	0.0182166	9.56121e-06	6215	17	66540315	GCST90277260	2	1	TRUE
22	rs964184	C	G	C	G	-0.163958	-0.0019	0.848991	FALSE	TRUE	TRUE	3004_67_PDCD1LG2_PD_L2	0.012099	0.875211	35377	chr11	116778201	0.0246535	3.16883e-11	6215	11	116778201	GCST90277260	2	1	FALSE
23	rs10022344	T	C	T	C	0.105672	0.0137	0.180771	FALSE	FALSE	FALSE	3234_23_CCDC80_URB	0.014055	0.329691	35353	chr4	124943164	0.0237049	8.40957e-06	6215	4	124943164	GCST90277260	2	1	TRUE
24	rs10502551	G	C	G	C	-0.212813	0.0077	0.0508576	FALSE	TRUE	TRUE	3234_23_CCDC80_URB	0.017587	0.66151	35345	chr18	30887893	0.0415968	3.21357e-07	6215	18	30887893	GCST90277260	2	1	FALSE
25	rs111750990	C	A	C	A	-0.214278	-0.0247	0.0413621	FALSE	FALSE	FALSE	3234_23_CCDC80_URB	0.018025	0.170592	35362	chr12	96298692	0.0455897	2.65328e-06	6215	12	96298692	GCST90277260	2	1	TRUE
26	rs11182480	C	T	C	T	0.345205	0.0194	0.0177771	FALSE	FALSE	FALSE	3234_23_CCDC80_URB	0.022583	0.390308	35356	chr12	44386579	0.069573	7.1595e-07	6215	12	44386579	GCST90277260	2	1	TRUE
27	rs112122274	G	A	G	A	-0.259929	0.0094	0.0359716	FALSE	FALSE	FALSE	3234_23_CCDC80_URB	0.023106	0.684141	35267	chr9	136257994	0.0525045	7.57659e-07	6215	9	136257994	GCST90277260	2	1	TRUE
28	rs11775636	A	G	A	G	-0.113375	-0.0034	0.15754	FALSE	FALSE	FALSE	3234_23_CCDC80_URB	0.009913	0.731601	35294	chr8	142752432	0.0242701	3.05366e-06	6215	8	142752432	GCST90277260	2	1	TRUE
29	rs117771237	A	C	A	C	0.383805	0.0434	0.0118126	FALSE	FALSE	FALSE	3234_23_CCDC80_URB	0.023125	0.060557	35369	chr22	40189878	0.0853419	7.01652e-06	6215	22	40189878	GCST90277260	2	1	TRUE
30	rs12050879	A	G	A	G	-0.277766	-0.0765	0.0208889	FALSE	FALSE	FALSE	3234_23_CCDC80_URB	0.055805	0.170421	35364	chr15	39983732	0.0621538	7.99098e-06	6215	15	39983732	GCST90277260	2	1	TRUE
31	rs1260326	C	T	C	T	-0.11192	0.0251	0.650878	FALSE	FALSE	FALSE	3234_23_CCDC80_URB	0.008675	0.003811	35373	chr2	27508073	0.0186705	2.15261e-09	6215	2	27508073	GCST90277260	2	1	TRUE
32	rs140283718	A	T	A	T	-0.265886	0.0077	0.0256515	FALSE	TRUE	TRUE	3234_23_CCDC80_URB	0.051202	0.880462	35368	chr19	30685856	0.0571052	3.28899e-06	6215	19	30685856	GCST90277260	2	1	FALSE
33	rs143808674	G	A	G	A	-0.186449	0.0186	0.048035	FALSE	FALSE	FALSE	3234_23_CCDC80_URB	0.018963	0.326667	35356	chr1	81671654	0.0419048	8.76095e-06	6215	1	81671654	GCST90277260	2	1	TRUE
34	rs147782497	A	C	A	C	0.267025	0.0005	0.0242209	FALSE	FALSE	FALSE	3234_23_CCDC80_URB	0.038818	0.989723	35092	chr18	78352143	0.0601294	9.11019e-06	6215	18	78352143	GCST90277260	2	1	TRUE
35	rs2182380	G	A	G	A	0.260746	-0.0193	0.03059	FALSE	FALSE	FALSE	3234_23_CCDC80_URB	0.018571	0.298688	35357	chr6	43900875	0.0543597	1.64945e-06	6215	6	43900875	GCST90277260	2	1	TRUE
36	rs2524075	T	C	T	C	-0.107183	0.0119	0.208006	FALSE	FALSE	FALSE	3234_23_CCDC80_URB	0.010652	0.263912	35439	chr6	31276082	0.0218188	9.21967e-07	6215	6	31276082	GCST90277260	2	1	TRUE
37	rs3829088	C	T	C	T	0.101769	-0.0055	0.202568	FALSE	FALSE	FALSE	3234_23_CCDC80_URB	0.010184	0.589163	35362	chr9	23713682	0.022403	5.65484e-06	6215	9	23713682	GCST90277260	2	1	TRUE
38	rs4788788	A	C	A	C	-0.0932329	0.0018	0.238157	FALSE	FALSE	FALSE	3234_23_CCDC80_URB	0.009379	0.847805	35376	chr16	71305356	0.0210341	9.46926e-06	6215	16	71305356	GCST90277260	2	1	TRUE
39	rs77134026	A	G	A	G	0.257957	-0.015	0.0306174	FALSE	FALSE	FALSE	3234_23_CCDC80_URB	0.022939	0.513169	35359	chr7	36495127	0.055336	3.20162e-06	6215	7	36495127	GCST90277260	2	1	TRUE
40	rs78263224	C	T	C	T	0.205521	-0.0025	0.0434622	FALSE	FALSE	FALSE	3234_23_CCDC80_URB	0.020115	0.901087	35379	chr19	52961172	0.0458816	7.61332e-06	6215	19	52961172	GCST90277260	2	1	TRUE
41	rs7910473	T	C	T	C	0.284781	-0.0383	0.977325	FALSE	FALSE	FALSE	3234_23_CCDC80_URB	0.031279	0.220774	35353	chr10	62379823	0.0610289	3.12792e-06	6215	10	62379823	GCST90277260	2	1	TRUE
42	rs7955732	T	G	T	G	-0.0886008	0.0017	0.422862	FALSE	FALSE	FALSE	3234_23_CCDC80_URB	0.008223	0.836215	35364	chr12	72331215	0.0182566	1.24412e-06	6215	12	72331215	GCST90277260	2	1	TRUE
43	rs908150	C	T	C	T	0.0807078	-0.0094	0.428483	FALSE	FALSE	FALSE	3234_23_CCDC80_URB	0.008404	0.263324	35369	chr17	66540315	0.0182166	9.56121e-06	6215	17	66540315	GCST90277260	2	1	TRUE
44	rs964184	C	G	C	G	-0.163958	-0.0138	0.848991	FALSE	TRUE	TRUE	3234_23_CCDC80_URB	0.012415	0.266312	35377	chr11	116778201	0.0246535	3.16883e-11	6215	11	116778201	GCST90277260	2	1	FALSE
45	rs10022344	T	C	T	C	0.105672	0	0.180771	FALSE	FALSE	FALSE	6605_17_IGFALS_IGFALS	0.011449	0.998335	35353	chr4	124943164	0.0237049	8.40957e-06	6215	4	124943164	GCST90277260	2	1	TRUE
46	rs10502551	G	C	G	C	-0.212813	0.0007	0.0508576	FALSE	TRUE	TRUE	6605_17_IGFALS_IGFALS	0.017249	0.967629	35345	chr18	30887893	0.0415968	3.21357e-07	6215	18	30887893	GCST90277260	2	1	FALSE
47	rs111750990	C	A	C	A	-0.214278	-0.0438	0.0413621	FALSE	FALSE	FALSE	6605_17_IGFALS_IGFALS	0.018004	0.014983	35362	chr12	96298692	0.0455897	2.65328e-06	6215	12	96298692	GCST90277260	2	1	TRUE
48	rs11182480	C	T	C	T	0.345205	-0.002	0.0177771	FALSE	FALSE	FALSE	6605_17_IGFALS_IGFALS	0.022378	0.928786	35356	chr12	44386579	0.069573	7.1595e-07	6215	12	44386579	GCST90277260	2	1	TRUE
49	rs112122274	G	A	G	A	-0.259929	-0.0124	0.0359716	FALSE	FALSE	FALSE	6605_17_IGFALS_IGFALS	0.022986	0.589571	35267	chr9	136257994	0.0525045	7.57659e-07	6215	9	136257994	GCST90277260	2	1	TRUE
50	rs11775636	A	G	A	G	-0.113375	0.0024	0.15754	FALSE	FALSE	FALSE	6605_17_IGFALS_IGFALS	0.010076	0.811732	35294	chr8	142752432	0.0242701	3.05366e-06	6215	8	142752432	GCST90277260	2	1	TRUE
51	rs117771237	A	C	A	C	0.383805	0.0064	0.0118126	FALSE	FALSE	FALSE	6605_17_IGFALS_IGFALS	0.023025	0.781048	35369	chr22	40189878	0.0853419	7.01652e-06	6215	22	40189878	GCST90277260	2	1	TRUE
52	rs12050879	A	G	A	G	-0.277766	-0.0113	0.0208889	FALSE	FALSE	FALSE	6605_17_IGFALS_IGFALS	0.055689	0.839204	35364	chr15	39983732	0.0621538	7.99098e-06	6215	15	39983732	GCST90277260	2	1	TRUE
53	rs1260326	C	T	C	T	-0.11192	-0.0331	0.650878	FALSE	FALSE	FALSE	6605_17_IGFALS_IGFALS	0.008638	0.0001271	35373	chr2	27508073	0.0186705	2.15261e-09	6215	2	27508073	GCST90277260	2	1	TRUE
54	rs140283718	A	T	A	T	-0.265886	0.0307	0.0256515	FALSE	TRUE	TRUE	6605_17_IGFALS_IGFALS	0.05111	0.548062	35368	chr19	30685856	0.0571052	3.28899e-06	6215	19	30685856	GCST90277260	2	1	FALSE
55	rs143808674	G	A	G	A	-0.186449	-0.0236	0.048035	FALSE	FALSE	FALSE	6605_17_IGFALS_IGFALS	0.018845	0.210449	35356	chr1	81671654	0.0419048	8.76095e-06	6215	1	81671654	GCST90277260	2	1	TRUE
56	rs147782497	A	C	A	C	0.267025	-0.0211	0.0242209	FALSE	FALSE	FALSE	6605_17_IGFALS_IGFALS	0.038157	0.580278	35092	chr18	78352143	0.0601294	9.11019e-06	6215	18	78352143	GCST90277260	2	1	TRUE
57	rs2182380	G	A	G	A	0.260746	0.0046	0.03059	FALSE	FALSE	FALSE	6605_17_IGFALS_IGFALS	0.01841	0.802691	35357	chr6	43900875	0.0543597	1.64945e-06	6215	6	43900875	GCST90277260	2	1	TRUE
58	rs2524075	T	C	T	C	-0.107183	-0.004	0.208006	FALSE	FALSE	FALSE	6605_17_IGFALS_IGFALS	0.010731	0.709333	35439	chr6	31276082	0.0218188	9.21967e-07	6215	6	31276082	GCST90277260	2	1	TRUE
59	rs3829088	C	T	C	T	0.101769	0.0049	0.202568	FALSE	FALSE	FALSE	6605_17_IGFALS_IGFALS	0.010251	0.632664	35362	chr9	23713682	0.022403	5.65484e-06	6215	9	23713682	GCST90277260	2	1	TRUE
60	rs4788788	A	C	A	C	-0.0932329	0.0013	0.238157	FALSE	FALSE	FALSE	6605_17_IGFALS_IGFALS	0.00922	0.887866	35376	chr16	71305356	0.0210341	9.46926e-06	6215	16	71305356	GCST90277260	2	1	TRUE
61	rs77134026	A	G	A	G	0.257957	-0.0389	0.0306174	FALSE	FALSE	FALSE	6605_17_IGFALS_IGFALS	0.02289	0.089232	35359	chr7	36495127	0.055336	3.20162e-06	6215	7	36495127	GCST90277260	2	1	TRUE
62	rs78263224	C	T	C	T	0.205521	-0.0018	0.0434622	FALSE	FALSE	FALSE	6605_17_IGFALS_IGFALS	0.019503	0.926463	35379	chr19	52961172	0.0458816	7.61332e-06	6215	19	52961172	GCST90277260	2	1	TRUE
63	rs7910473	T	C	T	C	0.284781	0.0305	0.977325	FALSE	FALSE	FALSE	6605_17_IGFALS_IGFALS	0.03127	0.329375	35353	chr10	62379823	0.0610289	3.12792e-06	6215	10	62379823	GCST90277260	2	1	TRUE
64	rs7955732	T	G	T	G	-0.0886008	0.0101	0.422862	FALSE	FALSE	FALSE	6605_17_IGFALS_IGFALS	0.0083	0.223666	35364	chr12	72331215	0.0182566	1.24412e-06	6215	12	72331215	GCST90277260	2	1	TRUE
65	rs908150	C	T	C	T	0.0807078	-0.003	0.428483	FALSE	FALSE	FALSE	6605_17_IGFALS_IGFALS	0.008333	0.718832	35369	chr17	66540315	0.0182166	9.56121e-06	6215	17	66540315	GCST90277260	2	1	TRUE
66	rs964184	C	G	C	G	-0.163958	-0.0105	0.848991	FALSE	TRUE	TRUE	6605_17_IGFALS_IGFALS	0.012362	0.395655	35377	chr11	116778201	0.0246535	3.16883e-11	6215	11	116778201	GCST90277260	2	1	FALSE
	SNP	effect_allele.exposure	other_allele.exposure	effect_allele.outcome	other_allele.outcome	beta.exposure	beta.outcome	eaf.exposure	remove	palindromic	ambiguous	id.outcome	se.outcome	pval.outcome	samplesize.outcome	chr.outcome	pos.outcome	se.exposure	pval.exposure	samplesize.exposure	chr.exposure	pos.exposure	exposure	action	SNP_index	mr_keep
1	rs10150075	T	C	T	C	-0.186342	-0.0169	0.0530446	FALSE	FALSE	FALSE	3004_67_PDCD1LG2_PD_L2	0.013734	0.218496	35352	chr14	72571809	0.0387578	1.55637e-06	7004	14	72571809	GCST90277307	2	1	TRUE
2	rs10503355	T	G	T	G	-0.1924	-0.032	0.0419607	FALSE	FALSE	FALSE	3004_67_PDCD1LG2_PD_L2	0.020693	0.122011	35380	chr8	6096074	0.0422775	5.43097e-06	7004	8	6096074	GCST90277307	2	1	TRUE
3	rs11045913	G	A	CATAGAGAC	TATAGAGAC	-0.0803798	-0.0214	0.646697	TRUE	FALSE	FALSE	3004_67_PDCD1LG2_PD_L2	0.008133	0.00851	35424	chr12	21263479	0.0179126	7.32213e-06	7004	12	21263479	GCST90277307	2	1	FALSE
4	rs117061362	T	G	T	G	0.189457	0.0447	0.044898	FALSE	FALSE	FALSE	3004_67_PDCD1LG2_PD_L2	0.03578	0.21156	35314	chr15	101196347	0.0415212	5.1271e-06	7004	15	101196347	GCST90277307	2	1	TRUE
5	rs11792256	G	T	G	T	-0.132598	0.0122	0.103047	FALSE	FALSE	FALSE	3004_67_PDCD1LG2_PD_L2	0.012524	0.329973	35203	chr9	874977	0.0277047	1.73328e-06	7004	9	874977	GCST90277307	2	1	TRUE
6	rs12050889	A	T	A	T	-0.0827827	0.0025	0.295832	FALSE	TRUE	TRUE	3004_67_PDCD1LG2_PD_L2	0.008372	0.765237	35368	chr15	62205752	0.0186069	8.75423e-06	7004	15	62205752	GCST90277307	2	1	FALSE
7	rs139606388	T	C	T	C	-0.24407	-0.0008	0.0291319	FALSE	FALSE	FALSE	3004_67_PDCD1LG2_PD_L2	0.033206	0.980779	35360	chr5	134851174	0.0499228	1.0354e-06	7004	5	134851174	GCST90277307	2	1	TRUE
8	rs143578075	A	G	AATTTCACTTGTCCGTTGG	AATCTCACTTGTCCGTTGG	-0.177456	-0.0045	0.049905	TRUE	FALSE	FALSE	3004_67_PDCD1LG2_PD_L2	0.018279	0.805537	35365	chr12	46987691	0.0384184	3.92233e-06	7004	12	46987694	GCST90277307	2	1	FALSE
9	rs174530	G	A	G	A	-0.167131	0.0102	0.414119	FALSE	FALSE	FALSE	3004_67_PDCD1LG2_PD_L2	0.008228	0.21509	35363	chr11	61779120	0.017116	2.20818e-22	7004	11	61779120	GCST90277307	2	1	TRUE
10	rs2067613	C	T	C	T	-0.0895605	0.0026	0.706892	FALSE	FALSE	FALSE	3004_67_PDCD1LG2_PD_L2	0.008917	0.770608	35365	chr3	176189554	0.018682	1.66813e-06	7004	3	176189554	GCST90277307	2	1	TRUE
11	rs2426606	T	C	T	C	0.0858671	0.001	0.720584	FALSE	FALSE	FALSE	3004_67_PDCD1LG2_PD_L2	0.009337	0.914709	35385	chr20	56297803	0.0190303	6.51792e-06	7004	20	56297803	GCST90277307	2	1	TRUE
12	rs2619330	T	G	T	G	0.125986	-0.0046	0.111661	FALSE	FALSE	FALSE	3004_67_PDCD1LG2_PD_L2	0.013599	0.735167	35369	chr3	124802671	0.0270503	3.25837e-06	7004	3	124802671	GCST90277307	2	1	TRUE
13	rs3110235	T	G	T	G	0.0948981	0.0039	0.207469	FALSE	FALSE	FALSE	3004_67_PDCD1LG2_PD_L2	0.009838	0.691787	35380	chr5	38486310	0.0208479	5.39959e-06	7004	5	38486310	GCST90277307	2	1	TRUE
14	rs3779874	T	C	T	C	0.101309	-0.015	0.827616	FALSE	FALSE	FALSE	3004_67_PDCD1LG2_PD_L2	0.009418	0.111237	35344	chr8	64610547	0.0223858	6.11736e-06	7004	8	64610547	GCST90277307	2	1	TRUE
15	rs4841133	G	A	G	A	0.106347	-0.0437	0.851776	FALSE	FALSE	FALSE	3004_67_PDCD1LG2_PD_L2	0.015304	0.004298	35385	chr8	9326154	0.0238242	8.17074e-06	7004	8	9326154	GCST90277307	2	1	TRUE
16	rs4987173	A	G	A	G	0.102216	0.0042	0.393394	FALSE	FALSE	FALSE	3004_67_PDCD1LG2_PD_L2	0.008042	0.60148	35368	chr6	42963486	0.0172817	3.47552e-09	7004	6	42963486	GCST90277307	2	1	TRUE
17	rs6030870	G	C	G	C	-0.148104	-0.0089	0.0747054	FALSE	TRUE	TRUE	3004_67_PDCD1LG2_PD_L2	0.012719	0.484073	35377	chr20	43445166	0.032651	5.8271e-06	7004	20	43445166	GCST90277307	2	1	FALSE
18	rs61900787	C	T	C	T	0.0786755	-0.005	0.414617	FALSE	FALSE	FALSE	3004_67_PDCD1LG2_PD_L2	0.008737	0.567113	35367	chr11	42654689	0.0171113	4.34e-06	7004	11	42654689	GCST90277307	2	1	TRUE
19	rs62345669	A	G	A	G	-0.472208	0.0006	0.00798403	FALSE	FALSE	FALSE	3004_67_PDCD1LG2_PD_L2	0.022129	0.978369	35362	chr4	147476374	0.0999636	2.35754e-06	7004	4	147476374	GCST90277307	2	1	TRUE
20	rs72827432	T	G	T	G	0.111439	0.0172	0.180542	FALSE	FALSE	FALSE	3004_67_PDCD1LG2_PD_L2	0.012642	0.173653	35357	chr17	18166314	0.0218276	3.38438e-07	7004	17	18166314	GCST90277307	2	1	TRUE
21	rs7539908	C	T	C	T	0.0984192	-0.0007	0.178136	FALSE	FALSE	FALSE	3004_67_PDCD1LG2_PD_L2	0.009686	0.942388	35365	chr1	53711606	0.0220982	8.56254e-06	7004	1	53711606	GCST90277307	2	1	TRUE
22	rs7542307	T	C	T	C	0.0844564	0.0017	0.347003	FALSE	FALSE	FALSE	3004_67_PDCD1LG2_PD_L2	0.008806	0.846912	35357	chr1	222093891	0.0177394	1.96372e-06	7004	1	222093891	GCST90277307	2	1	TRUE
23	rs7974440	A	G	A	G	-0.116279	-0.0018	0.137326	FALSE	FALSE	FALSE	3004_67_PDCD1LG2_PD_L2	0.010778	0.867361	35365	chr12	59019021	0.024707	2.56861e-06	7004	12	59019021	GCST90277307	2	1	TRUE
24	rs9719746	T	C	T	C	-0.250043	-0.0431	0.02478	FALSE	FALSE	FALSE	3004_67_PDCD1LG2_PD_L2	0.036768	0.241117	35353	chr7	155293878	0.0554291	6.55245e-06	7004	7	155293878	GCST90277307	2	1	TRUE
25	rs10150075	T	C	T	C	-0.186342	-0.0046	0.0530446	FALSE	FALSE	FALSE	3234_23_CCDC80_URB	0.014081	0.743917	35352	chr14	72571809	0.0387578	1.55637e-06	7004	14	72571809	GCST90277307	2	1	TRUE
26	rs10503355	T	G	T	G	-0.1924	-0.0027	0.0419607	FALSE	FALSE	FALSE	3234_23_CCDC80_URB	0.021033	0.897855	35380	chr8	6096074	0.0422775	5.43097e-06	7004	8	6096074	GCST90277307	2	1	TRUE
27	rs11045913	G	A	CATAGAGAC	TATAGAGAC	-0.0803798	-0.0262	0.646697	TRUE	FALSE	FALSE	3234_23_CCDC80_URB	0.008244	0.001483	35424	chr12	21263479	0.0179126	7.32213e-06	7004	12	21263479	GCST90277307	2	1	FALSE
28	rs117061362	T	G	T	G	0.189457	-0.0272	0.044898	FALSE	FALSE	FALSE	3234_23_CCDC80_URB	0.036317	0.453881	35314	chr15	101196347	0.0415212	5.1271e-06	7004	15	101196347	GCST90277307	2	1	TRUE
29	rs11792256	G	T	G	T	-0.132598	0.0098	0.103047	FALSE	FALSE	FALSE	3234_23_CCDC80_URB	0.012597	0.436609	35203	chr9	874977	0.0277047	1.73328e-06	7004	9	874977	GCST90277307	2	1	TRUE
30	rs12050889	A	T	A	T	-0.0827827	0.0009	0.295832	FALSE	TRUE	TRUE	3234_23_CCDC80_URB	0.008275	0.913388	35368	chr15	62205752	0.0186069	8.75423e-06	7004	15	62205752	GCST90277307	2	1	FALSE
31	rs139606388	T	C	T	C	-0.24407	-0.0369	0.0291319	FALSE	FALSE	FALSE	3234_23_CCDC80_URB	0.034385	0.283209	35360	chr5	134851174	0.0499228	1.0354e-06	7004	5	134851174	GCST90277307	2	1	TRUE
32	rs143578075	A	G	AATTTCACTTGTCCGTTGG	AATCTCACTTGTCCGTTGG	-0.177456	0.0098	0.049905	TRUE	FALSE	FALSE	3234_23_CCDC80_URB	0.018644	0.599143	35365	chr12	46987691	0.0384184	3.92233e-06	7004	12	46987694	GCST90277307	2	1	FALSE
33	rs174530	G	A	G	A	-0.167131	-0.0063	0.414119	FALSE	FALSE	FALSE	3234_23_CCDC80_URB	0.008275	0.446447	35363	chr11	61779120	0.017116	2.20818e-22	7004	11	61779120	GCST90277307	2	1	TRUE
34	rs2067613	C	T	C	T	-0.0895605	0.0164	0.706892	FALSE	FALSE	FALSE	3234_23_CCDC80_URB	0.008914	0.065812	35365	chr3	176189554	0.018682	1.66813e-06	7004	3	176189554	GCST90277307	2	1	TRUE
35	rs2426606	T	C	T	C	0.0858671	-0.0109	0.720584	FALSE	FALSE	FALSE	3234_23_CCDC80_URB	0.00913	0.232508	35385	chr20	56297803	0.0190303	6.51792e-06	7004	20	56297803	GCST90277307	2	1	TRUE
36	rs2619330	T	G	T	G	0.125986	-0.0361	0.111661	FALSE	FALSE	FALSE	3234_23_CCDC80_URB	0.013759	0.008698	35369	chr3	124802671	0.0270503	3.25837e-06	7004	3	124802671	GCST90277307	2	1	TRUE
37	rs3110235	T	G	T	G	0.0948981	-0.0005	0.207469	FALSE	FALSE	FALSE	3234_23_CCDC80_URB	0.010413	0.961704	35380	chr5	38486310	0.0208479	5.39959e-06	7004	5	38486310	GCST90277307	2	1	TRUE
38	rs3779874	T	C	T	C	0.101309	-0.0092	0.827616	FALSE	FALSE	FALSE	3234_23_CCDC80_URB	0.009524	0.334066	35344	chr8	64610547	0.0223858	6.11736e-06	7004	8	64610547	GCST90277307	2	1	TRUE
39	rs4841133	G	A	G	A	0.106347	0.0098	0.851776	FALSE	FALSE	FALSE	3234_23_CCDC80_URB	0.015502	0.527271	35385	chr8	9326154	0.0238242	8.17074e-06	7004	8	9326154	GCST90277307	2	1	TRUE
40	rs4987173	A	G	A	G	0.102216	0.0204	0.393394	FALSE	FALSE	FALSE	3234_23_CCDC80_URB	0.008123	0.012024	35368	chr6	42963486	0.0172817	3.47552e-09	7004	6	42963486	GCST90277307	2	1	TRUE
41	rs6030870	G	C	G	C	-0.148104	-0.0199	0.0747054	FALSE	TRUE	TRUE	3234_23_CCDC80_URB	0.012911	0.123246	35377	chr20	43445166	0.032651	5.8271e-06	7004	20	43445166	GCST90277307	2	1	FALSE
42	rs61900787	C	T	C	T	0.0786755	0.0087	0.414617	FALSE	FALSE	FALSE	3234_23_CCDC80_URB	0.008791	0.322358	35367	chr11	42654689	0.0171113	4.34e-06	7004	11	42654689	GCST90277307	2	1	TRUE
43	rs62345669	A	G	A	G	-0.472208	-0.0005	0.00798403	FALSE	FALSE	FALSE	3234_23_CCDC80_URB	0.01941	0.979449	35362	chr4	147476374	0.0999636	2.35754e-06	7004	4	147476374	GCST90277307	2	1	TRUE
44	rs72827432	T	G	T	G	0.111439	-0.0008	0.180542	FALSE	FALSE	FALSE	3234_23_CCDC80_URB	0.013564	0.952969	35357	chr17	18166314	0.0218276	3.38438e-07	7004	17	18166314	GCST90277307	2	1	TRUE
45	rs7539908	C	T	C	T	0.0984192	0.0067	0.178136	FALSE	FALSE	FALSE	3234_23_CCDC80_URB	0.009699	0.489709	35365	chr1	53711606	0.0220982	8.56254e-06	7004	1	53711606	GCST90277307	2	1	TRUE
46	rs7542307	T	C	T	C	0.0844564	-0.0044	0.347003	FALSE	FALSE	FALSE	3234_23_CCDC80_URB	0.009216	0.633069	35357	chr1	222093891	0.0177394	1.96372e-06	7004	1	222093891	GCST90277307	2	1	TRUE
47	rs7974440	A	G	A	G	-0.116279	0.0018	0.137326	FALSE	FALSE	FALSE	3234_23_CCDC80_URB	0.011224	0.872588	35365	chr12	59019021	0.024707	2.56861e-06	7004	12	59019021	GCST90277307	2	1	TRUE
48	rs9719746	T	C	T	C	-0.250043	-0.0077	0.02478	FALSE	FALSE	FALSE	3234_23_CCDC80_URB	0.03723	0.836149	35353	chr7	155293878	0.0554291	6.55245e-06	7004	7	155293878	GCST90277307	2	1	TRUE
49	rs10150075	T	C	T	C	-0.186342	0	0.0530446	FALSE	FALSE	FALSE	6605_17_IGFALS_IGFALS	0.011351	0.998335	35352	chr14	72571809	0.0387578	1.55637e-06	7004	14	72571809	GCST90277307	2	1	TRUE
50	rs10503355	T	G	T	G	-0.1924	-0.0077	0.0419607	FALSE	FALSE	FALSE	6605_17_IGFALS_IGFALS	0.02082	0.71151	35380	chr8	6096074	0.0422775	5.43097e-06	7004	8	6096074	GCST90277307	2	1	TRUE
51	rs11045913	G	A	CATAGAGAC	TATAGAGAC	-0.0803798	-0.0087	0.646697	TRUE	FALSE	FALSE	6605_17_IGFALS_IGFALS	0.008211	0.289376	35424	chr12	21263479	0.0179126	7.32213e-06	7004	12	21263479	GCST90277307	2	1	FALSE
52	rs117061362	T	G	T	G	0.189457	0.0011	0.044898	FALSE	FALSE	FALSE	6605_17_IGFALS_IGFALS	0.035242	0.9751	35314	chr15	101196347	0.0415212	5.1271e-06	7004	15	101196347	GCST90277307	2	1	TRUE
53	rs11792256	G	T	G	T	-0.132598	0.0373	0.103047	FALSE	FALSE	FALSE	6605_17_IGFALS_IGFALS	0.012604	0.003083	35203	chr9	874977	0.0277047	1.73328e-06	7004	9	874977	GCST90277307	2	1	TRUE
54	rs12050889	A	T	A	T	-0.0827827	-0.0109	0.295832	FALSE	TRUE	TRUE	6605_17_IGFALS_IGFALS	0.008341	0.191272	35368	chr15	62205752	0.0186069	8.75423e-06	7004	15	62205752	GCST90277307	2	1	FALSE
55	rs139606388	T	C	T	C	-0.24407	0.0094	0.0291319	FALSE	FALSE	FALSE	6605_17_IGFALS_IGFALS	0.034156	0.783156	35360	chr5	134851174	0.0499228	1.0354e-06	7004	5	134851174	GCST90277307	2	1	TRUE
56	rs143578075	A	G	AATTTCACTTGTCCGTTGG	AATCTCACTTGTCCGTTGG	-0.177456	-0.0388	0.049905	TRUE	FALSE	FALSE	6605_17_IGFALS_IGFALS	0.018618	0.037159	35365	chr12	46987691	0.0384184	3.92233e-06	7004	12	46987694	GCST90277307	2	1	FALSE
57	rs174530	G	A	G	A	-0.167131	0.0223	0.414119	FALSE	FALSE	FALSE	6605_17_IGFALS_IGFALS	0.008284	0.007101	35363	chr11	61779120	0.017116	2.20818e-22	7004	11	61779120	GCST90277307	2	1	TRUE
58	rs2067613	C	T	C	T	-0.0895605	-0.0139	0.706892	FALSE	FALSE	FALSE	6605_17_IGFALS_IGFALS	0.008908	0.118669	35365	chr3	176189554	0.018682	1.66813e-06	7004	3	176189554	GCST90277307	2	1	TRUE
59	rs2426606	T	C	T	C	0.0858671	-0.0042	0.720584	FALSE	FALSE	FALSE	6605_17_IGFALS_IGFALS	0.009008	0.641046	35385	chr20	56297803	0.0190303	6.51792e-06	7004	20	56297803	GCST90277307	2	1	TRUE
60	rs2619330	T	G	T	G	0.125986	-0.0255	0.111661	FALSE	FALSE	FALSE	6605_17_IGFALS_IGFALS	0.013708	0.06286	35369	chr3	124802671	0.0270503	3.25837e-06	7004	3	124802671	GCST90277307	2	1	TRUE
61	rs3110235	T	G	T	G	0.0948981	-0.0164	0.207469	FALSE	FALSE	FALSE	6605_17_IGFALS_IGFALS	0.009811	0.094593	35380	chr5	38486310	0.0208479	5.39959e-06	7004	5	38486310	GCST90277307	2	1	TRUE
62	rs3779874	T	C	T	C	0.101309	0.0005	0.827616	FALSE	FALSE	FALSE	6605_17_IGFALS_IGFALS	0.008881	0.955103	35344	chr8	64610547	0.0223858	6.11736e-06	7004	8	64610547	GCST90277307	2	1	TRUE
63	rs4841133	G	A	G	A	0.106347	-0.0425	0.851776	FALSE	FALSE	FALSE	6605_17_IGFALS_IGFALS	0.015488	0.006067	35385	chr8	9326154	0.0238242	8.17074e-06	7004	8	9326154	GCST90277307	2	1	TRUE
64	rs4987173	A	G	A	G	0.102216	-0.0167	0.393394	FALSE	FALSE	FALSE	6605_17_IGFALS_IGFALS	0.008111	0.039489	35368	chr6	42963486	0.0172817	3.47552e-09	7004	6	42963486	GCST90277307	2	1	TRUE
65	rs6030870	G	C	G	C	-0.148104	-0.006	0.0747054	FALSE	TRUE	TRUE	6605_17_IGFALS_IGFALS	0.012841	0.640317	35377	chr20	43445166	0.032651	5.8271e-06	7004	20	43445166	GCST90277307	2	1	FALSE
66	rs61900787	C	T	C	T	0.0786755	-0.0031	0.414617	FALSE	FALSE	FALSE	6605_17_IGFALS_IGFALS	0.008881	0.727056	35367	chr11	42654689	0.0171113	4.34e-06	7004	11	42654689	GCST90277307	2	1	TRUE
67	rs62345669	A	G	A	G	-0.472208	-0.0156	0.00798403	FALSE	FALSE	FALSE	6605_17_IGFALS_IGFALS	0.020637	0.4497	35362	chr4	147476374	0.0999636	2.35754e-06	7004	4	147476374	GCST90277307	2	1	TRUE
68	rs72827432	T	G	T	G	0.111439	-0.0021	0.180542	FALSE	FALSE	FALSE	6605_17_IGFALS_IGFALS	0.012729	0.868961	35357	chr17	18166314	0.0218276	3.38438e-07	7004	17	18166314	GCST90277307	2	1	TRUE
69	rs7539908	C	T	C	T	0.0984192	-0.0036	0.178136	FALSE	FALSE	FALSE	6605_17_IGFALS_IGFALS	0.009539	0.705865	35365	chr1	53711606	0.0220982	8.56254e-06	7004	1	53711606	GCST90277307	2	1	TRUE
70	rs7542307	T	C	T	C	0.0844564	0.0137	0.347003	FALSE	FALSE	FALSE	6605_17_IGFALS_IGFALS	0.009132	0.133553	35357	chr1	222093891	0.0177394	1.96372e-06	7004	1	222093891	GCST90277307	2	1	TRUE
71	rs7974440	A	G	A	G	-0.116279	-0.0018	0.137326	FALSE	FALSE	FALSE	6605_17_IGFALS_IGFALS	0.010881	0.868614	35365	chr12	59019021	0.024707	2.56861e-06	7004	12	59019021	GCST90277307	2	1	TRUE
72	rs9719746	T	C	T	C	-0.250043	0.0144	0.02478	FALSE	FALSE	FALSE	6605_17_IGFALS_IGFALS	0.03724	0.698995	35353	chr7	155293878	0.0554291	6.55245e-06	7004	7	155293878	GCST90277307	2	1	TRUE
	SNP	effect_allele.exposure	other_allele.exposure	effect_allele.outcome	other_allele.outcome	beta.exposure	beta.outcome	eaf.exposure	remove	palindromic	ambiguous	id.outcome	se.outcome	pval.outcome	samplesize.outcome	chr.outcome	pos.outcome	se.exposure	pval.exposure	samplesize.exposure	chr.exposure	pos.exposure	exposure	action	SNP_index	mr_keep
1	rs10248190	A	T	A	T	0.143524	0.0126	0.0999443	FALSE	TRUE	TRUE	3004_67_PDCD1LG2_PD_L2	0.011271	0.263608	35355	chr7	131005149	0.0320117	7.48374e-06	5658	7	131005149	GCST90277319	2	1	FALSE
2	rs114541469	C	G	C	G	0.149856	-0.0099	0.0900666	FALSE	TRUE	TRUE	3004_67_PDCD1LG2_PD_L2	0.016921	0.558502	35359	chr2	47577655	0.033598	8.32959e-06	5658	2	47577655	GCST90277319	2	1	FALSE
3	rs117421874	T	C	T	C	-0.521325	0.0443	0.00746462	FALSE	FALSE	FALSE	3004_67_PDCD1LG2_PD_L2	0.023575	0.060228	35350	chr13	62695542	0.110342	2.35899e-06	5658	13	62695542	GCST90277319	2	1	TRUE
4	rs13394815	A	C	A	C	-0.0942671	-0.0008	0.389131	FALSE	FALSE	FALSE	3004_67_PDCD1LG2_PD_L2	0.009577	0.933425	35358	chr2	70336870	0.0194531	1.28947e-06	5658	2	70336870	GCST90277319	2	1	TRUE
5	rs146085506	C	T	C	T	0.201626	0.0162	0.058381	FALSE	FALSE	FALSE	3004_67_PDCD1LG2_PD_L2	0.021077	0.442117	35356	chr9	31384831	0.0414791	1.19829e-06	5658	9	31384831	GCST90277319	2	1	TRUE
6	rs16916332	A	G	A	G	0.209797	-0.0082	0.043558	FALSE	FALSE	FALSE	3004_67_PDCD1LG2_PD_L2	0.027296	0.76386	35355	chr8	51454913	0.0463934	6.24441e-06	5658	8	51454913	GCST90277319	2	1	TRUE
7	rs17231506	T	C	T	C	0.132635	-0.0044	0.27829	FALSE	FALSE	FALSE	3004_67_PDCD1LG2_PD_L2	0.008546	0.606667	35369	chr16	56960616	0.0207858	1.898e-10	5658	16	56960616	GCST90277319	2	1	TRUE
8	rs1800588	T	C	T	C	0.109798	-0.0062	0.258046	FALSE	FALSE	FALSE	3004_67_PDCD1LG2_PD_L2	0.010204	0.543464	35365	chr15	58431476	0.0217989	4.85542e-07	5658	15	58431476	GCST90277319	2	1	TRUE
9	rs2356187	A	G	A	G	0.126259	0.0236	0.868648	FALSE	FALSE	FALSE	3004_67_PDCD1LG2_PD_L2	0.014793	0.110624	35348	chr2	158513491	0.0279803	6.53604e-06	5658	2	158513491	GCST90277319	2	1	TRUE
10	rs28609532	G	A	G	A	-0.165868	-0.0014	0.0732311	FALSE	FALSE	FALSE	3004_67_PDCD1LG2_PD_L2	0.015773	0.929273	35360	chr14	62141305	0.0357684	3.60748e-06	5658	14	62141305	GCST90277319	2	1	TRUE
11	rs4744927	C	A	C	A	0.953489	-0.023	0.997869	FALSE	FALSE	FALSE	3004_67_PDCD1LG2_PD_L2	0.075466	0.760538	35349	chr9	69669802	0.212198	7.10561e-06	5658	9	69669802	GCST90277319	2	1	TRUE
12	rs603424	A	G	A	G	-0.143466	0.0056	0.121331	FALSE	FALSE	FALSE	3004_67_PDCD1LG2_PD_L2	0.013599	0.680492	35364	chr10	100315722	0.0294136	1.1033e-06	5658	10	100315722	GCST90277319	2	1	TRUE
13	rs62311841	A	G	A	G	-0.161837	-0.0039	0.123593	FALSE	FALSE	FALSE	3004_67_PDCD1LG2_PD_L2	0.010387	0.707309	35352	chr4	133202073	0.0291284	2.88396e-08	5658	4	133202073	GCST90277319	2	1	TRUE
14	rs6453462	G	A	G	A	0.194321	0.0027	0.934135	FALSE	FALSE	FALSE	3004_67_PDCD1LG2_PD_L2	0.015522	0.86191	35344	chr5	79597004	0.0390362	6.61196e-07	5658	5	79597004	GCST90277319	2	1	TRUE
15	rs728516	A	G	A	G	-0.0848472	-0.0041	0.52608	FALSE	FALSE	FALSE	3004_67_PDCD1LG2_PD_L2	0.008061	0.611032	35375	chr11	45579256	0.0187219	5.97195e-06	5658	11	45579256	GCST90277319	2	1	TRUE
16	rs72973984	G	A	G	A	-0.144642	-0.0018	0.109368	FALSE	FALSE	FALSE	3004_67_PDCD1LG2_PD_L2	0.013916	0.897083	35367	chr11	105208627	0.0306546	2.43138e-06	5658	11	105208627	GCST90277319	2	1	TRUE
17	rs77494629	A	C	A	C	0.106503	-0.0052	0.268388	FALSE	FALSE	FALSE	3004_67_PDCD1LG2_PD_L2	0.013166	0.692867	35368	chr2	101572416	0.0213856	6.53834e-07	5658	2	101572416	GCST90277319	2	1	TRUE
18	rs10248190	A	T	A	T	0.143524	-0.0102	0.0999443	FALSE	TRUE	TRUE	3234_23_CCDC80_URB	0.011367	0.369532	35355	chr7	131005149	0.0320117	7.48374e-06	5658	7	131005149	GCST90277319	2	1	FALSE
19	rs114541469	C	G	C	G	0.149856	0.0062	0.0900666	FALSE	TRUE	TRUE	3234_23_CCDC80_URB	0.017076	0.716547	35359	chr2	47577655	0.033598	8.32959e-06	5658	2	47577655	GCST90277319	2	1	FALSE
20	rs117421874	T	C	T	C	-0.521325	0.015	0.00746462	FALSE	FALSE	FALSE	3234_23_CCDC80_URB	0.023986	0.531727	35350	chr13	62695542	0.110342	2.35899e-06	5658	13	62695542	GCST90277319	2	1	TRUE
21	rs13394815	A	C	A	C	-0.0942671	0.0031	0.389131	FALSE	FALSE	FALSE	3234_23_CCDC80_URB	0.009692	0.749082	35358	chr2	70336870	0.0194531	1.28947e-06	5658	2	70336870	GCST90277319	2	1	TRUE
22	rs146085506	C	T	C	T	0.201626	-0.0021	0.058381	FALSE	FALSE	FALSE	3234_23_CCDC80_URB	0.021061	0.920575	35356	chr9	31384831	0.0414791	1.19829e-06	5658	9	31384831	GCST90277319	2	1	TRUE
23	rs16916332	A	G	A	G	0.209797	-0.0005	0.043558	FALSE	FALSE	FALSE	3234_23_CCDC80_URB	0.030206	0.986793	35355	chr8	51454913	0.0463934	6.24441e-06	5658	8	51454913	GCST90277319	2	1	TRUE
24	rs17231506	T	C	T	C	0.132635	-0.002	0.27829	FALSE	FALSE	FALSE	3234_23_CCDC80_URB	0.008894	0.822072	35369	chr16	56960616	0.0207858	1.898e-10	5658	16	56960616	GCST90277319	2	1	TRUE
25	rs1800588	T	C	T	C	0.109798	-0.0017	0.258046	FALSE	FALSE	FALSE	3234_23_CCDC80_URB	0.010588	0.872436	35365	chr15	58431476	0.0217989	4.85542e-07	5658	15	58431476	GCST90277319	2	1	TRUE
26	rs2356187	A	G	A	G	0.126259	0.0075	0.868648	FALSE	FALSE	FALSE	3234_23_CCDC80_URB	0.014901	0.614732	35348	chr2	158513491	0.0279803	6.53604e-06	5658	2	158513491	GCST90277319	2	1	TRUE
27	rs28609532	G	A	G	A	-0.165868	-0.0106	0.0732311	FALSE	FALSE	FALSE	3234_23_CCDC80_URB	0.015666	0.498636	35360	chr14	62141305	0.0357684	3.60748e-06	5658	14	62141305	GCST90277319	2	1	TRUE
28	rs4744927	C	A	C	A	0.953489	0.0517	0.997869	FALSE	FALSE	FALSE	3234_23_CCDC80_URB	0.075789	0.495141	35349	chr9	69669802	0.212198	7.10561e-06	5658	9	69669802	GCST90277319	2	1	TRUE
29	rs603424	A	G	A	G	-0.143466	0.0007	0.121331	FALSE	FALSE	FALSE	3234_23_CCDC80_URB	0.014836	0.962368	35364	chr10	100315722	0.0294136	1.1033e-06	5658	10	100315722	GCST90277319	2	1	TRUE
30	rs62311841	A	G	A	G	-0.161837	0	0.123593	FALSE	FALSE	FALSE	3234_23_CCDC80_URB	0.008888	0.997665	35352	chr4	133202073	0.0291284	2.88396e-08	5658	4	133202073	GCST90277319	2	1	TRUE
31	rs6453462	G	A	G	A	0.194321	0.0036	0.934135	FALSE	FALSE	FALSE	3234_23_CCDC80_URB	0.015352	0.814596	35344	chr5	79597004	0.0390362	6.61196e-07	5658	5	79597004	GCST90277319	2	1	TRUE
32	rs728516	A	G	A	G	-0.0848472	-0.0243	0.52608	FALSE	FALSE	FALSE	3234_23_CCDC80_URB	0.008221	0.003119	35375	chr11	45579256	0.0187219	5.97195e-06	5658	11	45579256	GCST90277319	2	1	TRUE
33	rs72973984	G	A	G	A	-0.144642	-0.0189	0.109368	FALSE	FALSE	FALSE	3234_23_CCDC80_URB	0.014066	0.17905	35367	chr11	105208627	0.0306546	2.43138e-06	5658	11	105208627	GCST90277319	2	1	TRUE
34	rs77494629	A	C	A	C	0.106503	0.0316	0.268388	FALSE	FALSE	FALSE	3234_23_CCDC80_URB	0.013231	0.016923	35368	chr2	101572416	0.0213856	6.53834e-07	5658	2	101572416	GCST90277319	2	1	TRUE
35	rs10248190	A	T	A	T	0.143524	0.0192	0.0999443	FALSE	TRUE	TRUE	6605_17_IGFALS_IGFALS	0.011353	0.090803	35355	chr7	131005149	0.0320117	7.48374e-06	5658	7	131005149	GCST90277319	2	1	FALSE
36	rs114541469	C	G	C	G	0.149856	-0.0064	0.0900666	FALSE	TRUE	TRUE	6605_17_IGFALS_IGFALS	0.016995	0.706479	35359	chr2	47577655	0.033598	8.32959e-06	5658	2	47577655	GCST90277319	2	1	FALSE
37	rs117421874	T	C	T	C	-0.521325	0.0157	0.00746462	FALSE	FALSE	FALSE	6605_17_IGFALS_IGFALS	0.023792	0.509334	35350	chr13	62695542	0.110342	2.35899e-06	5658	13	62695542	GCST90277319	2	1	TRUE
38	rs13394815	A	C	A	C	-0.0942671	0.0051	0.389131	FALSE	FALSE	FALSE	6605_17_IGFALS_IGFALS	0.00962	0.596019	35358	chr2	70336870	0.0194531	1.28947e-06	5658	2	70336870	GCST90277319	2	1	TRUE
39	rs146085506	C	T	C	T	0.201626	0.0174	0.058381	FALSE	FALSE	FALSE	6605_17_IGFALS_IGFALS	0.021111	0.409827	35356	chr9	31384831	0.0414791	1.19829e-06	5658	9	31384831	GCST90277319	2	1	TRUE
40	rs16916332	A	G	A	G	0.209797	-0.0128	0.043558	FALSE	FALSE	FALSE	6605_17_IGFALS_IGFALS	0.027431	0.640765	35355	chr8	51454913	0.0463934	6.24441e-06	5658	8	51454913	GCST90277319	2	1	TRUE
41	rs17231506	T	C	T	C	0.132635	0.0032	0.27829	FALSE	FALSE	FALSE	6605_17_IGFALS_IGFALS	0.008832	0.717122	35369	chr16	56960616	0.0207858	1.898e-10	5658	16	56960616	GCST90277319	2	1	TRUE
42	rs1800588	T	C	T	C	0.109798	-0.0101	0.258046	FALSE	FALSE	FALSE	6605_17_IGFALS_IGFALS	0.010343	0.328795	35365	chr15	58431476	0.0217989	4.85542e-07	5658	15	58431476	GCST90277319	2	1	TRUE
43	rs2356187	A	G	A	G	0.126259	-0.0102	0.868648	FALSE	FALSE	FALSE	6605_17_IGFALS_IGFALS	0.014928	0.494428	35348	chr2	158513491	0.0279803	6.53604e-06	5658	2	158513491	GCST90277319	2	1	TRUE
44	rs28609532	G	A	G	A	-0.165868	-0.0052	0.0732311	FALSE	FALSE	FALSE	6605_17_IGFALS_IGFALS	0.015675	0.740088	35360	chr14	62141305	0.0357684	3.60748e-06	5658	14	62141305	GCST90277319	2	1	TRUE
45	rs4744927	C	A	C	A	0.953489	-0.0166	0.997869	FALSE	FALSE	FALSE	6605_17_IGFALS_IGFALS	0.075627	0.826263	35349	chr9	69669802	0.212198	7.10561e-06	5658	9	69669802	GCST90277319	2	1	TRUE
46	rs603424	A	G	A	G	-0.143466	0.0441	0.121331	FALSE	FALSE	FALSE	6605_17_IGFALS_IGFALS	0.013831	0.00143	35364	chr10	100315722	0.0294136	1.1033e-06	5658	10	100315722	GCST90277319	2	1	TRUE
47	rs62311841	A	G	A	G	-0.161837	-0.0051	0.123593	FALSE	FALSE	FALSE	6605_17_IGFALS_IGFALS	0.010573	0.629564	35352	chr4	133202073	0.0291284	2.88396e-08	5658	4	133202073	GCST90277319	2	1	TRUE
48	rs6453462	G	A	G	A	0.194321	-0.0121	0.934135	FALSE	FALSE	FALSE	6605_17_IGFALS_IGFALS	0.015456	0.433709	35344	chr5	79597004	0.0390362	6.61196e-07	5658	5	79597004	GCST90277319	2	1	TRUE
49	rs728516	A	G	A	G	-0.0848472	-0.0047	0.52608	FALSE	FALSE	FALSE	6605_17_IGFALS_IGFALS	0.008247	0.56875	35375	chr11	45579256	0.0187219	5.97195e-06	5658	11	45579256	GCST90277319	2	1	TRUE
50	rs72973984	G	A	G	A	-0.144642	-0.0032	0.109368	FALSE	FALSE	FALSE	6605_17_IGFALS_IGFALS	0.014107	0.82055	35367	chr11	105208627	0.0306546	2.43138e-06	5658	11	105208627	GCST90277319	2	1	TRUE
51	rs77494629	A	C	A	C	0.106503	0.0106	0.268388	FALSE	FALSE	FALSE	6605_17_IGFALS_IGFALS	0.013186	0.421449	35368	chr2	101572416	0.0213856	6.53834e-07	5658	2	101572416	GCST90277319	2	1	TRUE
	SNP	effect_allele.exposure	other_allele.exposure	effect_allele.outcome	other_allele.outcome	beta.exposure	beta.outcome	eaf.exposure	remove	palindromic	ambiguous	id.outcome	se.outcome	pval.outcome	samplesize.outcome	chr.outcome	pos.outcome	se.exposure	pval.exposure	samplesize.exposure	chr.exposure	pos.exposure	exposure	action	SNP_index	mr_keep
1	rs1077834	C	T	C	T	0.100473	-0.0069	0.266328	FALSE	FALSE	FALSE	3004_67_PDCD1LG2_PD_L2	0.010076	0.493452	35365	chr15	58431280	0.0193402	2.10175e-07	7096	15	58431280	GCST90277328	2	1	TRUE
2	rs10859677	G	A	G	A	-0.0805653	0.0123	0.604843	FALSE	FALSE	FALSE	3004_67_PDCD1LG2_PD_L2	0.00826	0.136477	35367	chr12	94142171	0.0176797	5.27349e-06	7096	12	94142171	GCST90277328	2	1	TRUE
3	rs114517755	C	A	C	A	0.652794	-0.1442	0.00510191	FALSE	FALSE	FALSE	3004_67_PDCD1LG2_PD_L2	0.052139	0.00568	35353	chr2	181779530	0.129037	4.31377e-07	7096	2	181779530	GCST90277328	2	1	TRUE
4	rs117002628	A	G	A	G	0.510621	-0.0391	0.00624671	FALSE	FALSE	FALSE	3004_67_PDCD1LG2_PD_L2	0.049048	0.425343	35363	chr12	46480289	0.111133	4.40538e-06	7096	12	46480289	GCST90277328	2	1	TRUE
5	rs11918522	A	G	A	G	0.109339	-0.0123	0.158871	FALSE	FALSE	FALSE	3004_67_PDCD1LG2_PD_L2	0.011553	0.28705	35363	chr3	112816210	0.0230214	2.0782e-06	7096	3	112816210	GCST90277328	2	1	TRUE
6	rs12426108	C	T	C	T	-0.147696	-0.0102	0.082789	FALSE	FALSE	FALSE	3004_67_PDCD1LG2_PD_L2	0.019709	0.604787	35363	chr12	68489126	0.0306904	1.52135e-06	7096	12	68489126	GCST90277328	2	1	TRUE
7	rs13403377	T	C	T	C	0.0849022	-0.0151	0.355901	FALSE	FALSE	FALSE	3004_67_PDCD1LG2_PD_L2	0.008356	0.070751	35354	chr2	205953957	0.0175628	1.36381e-06	7096	2	205953957	GCST90277328	2	1	TRUE
8	rs138542536	C	A	C	A	-0.357113	-0.016	0.0132828	FALSE	FALSE	FALSE	3004_67_PDCD1LG2_PD_L2	0.030076	0.594735	35356	chr4	25796122	0.0791998	6.61281e-06	7096	4	25796122	GCST90277328	2	1	TRUE
9	rs139013784	A	G	A	G	-0.361357	-0.0492	0.0116233	FALSE	FALSE	FALSE	3004_67_PDCD1LG2_PD_L2	0.039524	0.213205	35362	chr17	50256987	0.0814729	9.3253e-06	7096	17	50256987	GCST90277328	2	1	TRUE
10	rs143533648	T	C	T	C	0.251731	-0.049	0.0261711	FALSE	FALSE	FALSE	3004_67_PDCD1LG2_PD_L2	0.064487	0.447345	35354	chr2	214577935	0.0536185	2.71433e-06	7096	2	214577935	GCST90277328	2	1	TRUE
11	rs151236898	C	G	CTCCTGACTC	GTCCTGACTC	0.26584	0.0334	0.0213116	TRUE	TRUE	TRUE	3004_67_PDCD1LG2_PD_L2	0.029986	0.265347	35350	chr8	74189562	0.0582818	5.16487e-06	7096	8	74189562	GCST90277328	2	1	FALSE
12	rs1532085	G	A	G	A	-0.115334	0.0091	0.573441	FALSE	FALSE	FALSE	3004_67_PDCD1LG2_PD_L2	0.008147	0.264011	35364	chr15	58391167	0.016874	8.87894e-12	7096	15	58391167	GCST90277328	2	1	TRUE
13	rs17194174	A	G	TCCATACAGAC	TCCACACAGAC	0.16511	0.0009	0.0590291	TRUE	FALSE	FALSE	3004_67_PDCD1LG2_PD_L2	0.011321	0.936636	35444	chr6	30094129	0.0363759	5.74209e-06	7096	6	30094133	GCST90277328	2	1	FALSE
14	rs17231506	T	C	T	C	0.12842	-0.0044	0.27829	FALSE	FALSE	FALSE	3004_67_PDCD1LG2_PD_L2	0.008546	0.606667	35369	chr16	56960616	0.0185964	5.42067e-12	7096	16	56960616	GCST90277328	2	1	TRUE
15	rs180360	G	A	G	A	0.0860429	0.011	0.32354	FALSE	FALSE	FALSE	3004_67_PDCD1LG2_PD_L2	0.009552	0.249505	35377	chr11	116728272	0.017959	1.69262e-06	7096	11	116728272	GCST90277328	2	1	TRUE
16	rs186412131	A	G	A	G	-0.207416	-0.2362	0.0355509	FALSE	FALSE	FALSE	3004_67_PDCD1LG2_PD_L2	0.090032	0.008703	35380	chr12	124792520	0.046059	6.79358e-06	7096	12	124792520	GCST90277328	2	1	TRUE
17	rs2670896	A	G	A	G	-0.23369	0.0149	0.0302574	FALSE	FALSE	FALSE	3004_67_PDCD1LG2_PD_L2	0.025031	0.551666	35363	chr3	129984722	0.0498075	2.75572e-06	7096	3	129984722	GCST90277328	2	1	TRUE
18	rs2977197	C	G	C	G	0.144489	-0.0185	0.917825	FALSE	TRUE	TRUE	3004_67_PDCD1LG2_PD_L2	0.014137	0.190668	35276	chr8	1742309	0.031219	3.75145e-06	7096	8	1742309	GCST90277328	2	1	FALSE
19	rs4237708	A	G	A	G	-0.126227	-0.0108	0.889578	FALSE	FALSE	FALSE	3004_67_PDCD1LG2_PD_L2	0.010948	0.323908	35370	chr11	15423060	0.0270132	3.02326e-06	7096	11	15423060	GCST90277328	2	1	TRUE
20	rs61999264	A	G	A	G	-0.344403	-0.0311	0.0127706	FALSE	FALSE	FALSE	3004_67_PDCD1LG2_PD_L2	0.036447	0.393492	35361	chr5	149246504	0.0745108	3.86141e-06	7096	5	149246504	GCST90277328	2	1	TRUE
21	rs62087966	G	A	G	A	0.498896	-0.0099	0.00715911	FALSE	FALSE	FALSE	3004_67_PDCD1LG2_PD_L2	0.030912	0.748765	35327	chr18	369878	0.104611	1.88603e-06	7096	18	369878	GCST90277328	2	1	TRUE
22	rs627108	T	C	T	C	-0.0859253	0.0034	0.395819	FALSE	FALSE	FALSE	3004_67_PDCD1LG2_PD_L2	0.008587	0.692148	35356	chr1	230174822	0.0171063	5.20439e-07	7096	1	230174822	GCST90277328	2	1	TRUE
23	rs76103105	A	G	A	G	-0.211515	-0.0075	0.0356681	FALSE	FALSE	FALSE	3004_67_PDCD1LG2_PD_L2	0.015622	0.631165	35374	chr10	4699577	0.045951	4.23479e-06	7096	10	4699577	GCST90277328	2	1	TRUE
24	rs77099066	A	G	A	G	-0.580106	0.0219	0.00467425	FALSE	FALSE	FALSE	3004_67_PDCD1LG2_PD_L2	0.030292	0.469703	35258	chr21	45199268	0.130745	9.25468e-06	7096	21	45199268	GCST90277328	2	1	TRUE
25	rs77172221	C	T	C	T	-0.137307	0.0146	0.089828	FALSE	FALSE	FALSE	3004_67_PDCD1LG2_PD_L2	0.016563	0.378045	35363	chr12	23079509	0.0299203	4.52584e-06	7096	12	23079509	GCST90277328	2	1	TRUE
26	rs9666651	T	C	T	C	0.0846269	0.0017	0.262591	FALSE	FALSE	FALSE	3004_67_PDCD1LG2_PD_L2	0.009272	0.854523	35378	chr11	34810889	0.0191322	9.85932e-06	7096	11	34810889	GCST90277328	2	1	TRUE
27	rs1077834	C	T	C	T	0.100473	0.001	0.266328	FALSE	FALSE	FALSE	3234_23_CCDC80_URB	0.010382	0.923263	35365	chr15	58431280	0.0193402	2.10175e-07	7096	15	58431280	GCST90277328	2	1	TRUE
28	rs10859677	G	A	G	A	-0.0805653	-0.0037	0.604843	FALSE	FALSE	FALSE	3234_23_CCDC80_URB	0.008432	0.660797	35367	chr12	94142171	0.0176797	5.27349e-06	7096	12	94142171	GCST90277328	2	1	TRUE
29	rs114517755	C	A	C	A	0.652794	-0.1463	0.00510191	FALSE	FALSE	FALSE	3234_23_CCDC80_URB	0.05287	0.005655	35353	chr2	181779530	0.129037	4.31377e-07	7096	2	181779530	GCST90277328	2	1	TRUE
30	rs117002628	A	G	A	G	0.510621	0.0016	0.00624671	FALSE	FALSE	FALSE	3234_23_CCDC80_URB	0.049253	0.974085	35363	chr12	46480289	0.111133	4.40538e-06	7096	12	46480289	GCST90277328	2	1	TRUE
31	rs11918522	A	G	A	G	0.109339	0.0146	0.158871	FALSE	FALSE	FALSE	3234_23_CCDC80_URB	0.011689	0.21165	35363	chr3	112816210	0.0230214	2.0782e-06	7096	3	112816210	GCST90277328	2	1	TRUE
32	rs12426108	C	T	C	T	-0.147696	-0.035	0.082789	FALSE	FALSE	FALSE	3234_23_CCDC80_URB	0.019999	0.080108	35363	chr12	68489126	0.0306904	1.52135e-06	7096	12	68489126	GCST90277328	2	1	TRUE
33	rs13403377	T	C	T	C	0.0849022	-0.021	0.355901	FALSE	FALSE	FALSE	3234_23_CCDC80_URB	0.008478	0.013253	35354	chr2	205953957	0.0175628	1.36381e-06	7096	2	205953957	GCST90277328	2	1	TRUE
34	rs138542536	C	A	C	A	-0.357113	0.0135	0.0132828	FALSE	FALSE	FALSE	3234_23_CCDC80_URB	0.030527	0.658319	35356	chr4	25796122	0.0791998	6.61281e-06	7096	4	25796122	GCST90277328	2	1	TRUE
35	rs139013784	A	G	A	G	-0.361357	-0.0039	0.0116233	FALSE	FALSE	FALSE	3234_23_CCDC80_URB	0.040284	0.922876	35362	chr17	50256987	0.0814729	9.3253e-06	7096	17	50256987	GCST90277328	2	1	TRUE
36	rs143533648	T	C	T	C	0.251731	0.0196	0.0261711	FALSE	FALSE	FALSE	3234_23_CCDC80_URB	0.065267	0.763944	35354	chr2	214577935	0.0536185	2.71433e-06	7096	2	214577935	GCST90277328	2	1	TRUE
37	rs151236898	C	G	CTCCTGACTC	GTCCTGACTC	0.26584	-0.0013	0.0213116	TRUE	TRUE	TRUE	3234_23_CCDC80_URB	0.031278	0.966847	35350	chr8	74189562	0.0582818	5.16487e-06	7096	8	74189562	GCST90277328	2	1	FALSE
38	rs1532085	G	A	G	A	-0.115334	0.0053	0.573441	FALSE	FALSE	FALSE	3234_23_CCDC80_URB	0.008248	0.520486	35364	chr15	58391167	0.016874	8.87894e-12	7096	15	58391167	GCST90277328	2	1	TRUE
39	rs17194174	A	G	TCCATACAGAC	TCCACACAGAC	0.16511	0.0125	0.0590291	TRUE	FALSE	FALSE	3234_23_CCDC80_URB	0.011486	0.276474	35444	chr6	30094129	0.0363759	5.74209e-06	7096	6	30094133	GCST90277328	2	1	FALSE
40	rs17231506	T	C	T	C	0.12842	-0.002	0.27829	FALSE	FALSE	FALSE	3234_23_CCDC80_URB	0.008894	0.822072	35369	chr16	56960616	0.0185964	5.42067e-12	7096	16	56960616	GCST90277328	2	1	TRUE
41	rs180360	G	A	G	A	0.0860429	0.0043	0.32354	FALSE	FALSE	FALSE	3234_23_CCDC80_URB	0.009808	0.661084	35377	chr11	116728272	0.017959	1.69262e-06	7096	11	116728272	GCST90277328	2	1	TRUE
42	rs186412131	A	G	A	G	-0.207416	0.0089	0.0355509	FALSE	FALSE	FALSE	3234_23_CCDC80_URB	0.090858	0.921968	35380	chr12	124792520	0.046059	6.79358e-06	7096	12	124792520	GCST90277328	2	1	TRUE
43	rs2670896	A	G	A	G	-0.23369	-0.0172	0.0302574	FALSE	FALSE	FALSE	3234_23_CCDC80_URB	0.025311	0.496788	35363	chr3	129984722	0.0498075	2.75572e-06	7096	3	129984722	GCST90277328	2	1	TRUE
44	rs2977197	C	G	C	G	0.144489	0.0264	0.917825	FALSE	TRUE	TRUE	3234_23_CCDC80_URB	0.014329	0.065409	35276	chr8	1742309	0.031219	3.75145e-06	7096	8	1742309	GCST90277328	2	1	FALSE
45	rs4237708	A	G	A	G	-0.126227	0.0043	0.889578	FALSE	FALSE	FALSE	3234_23_CCDC80_URB	0.011184	0.700621	35370	chr11	15423060	0.0270132	3.02326e-06	7096	11	15423060	GCST90277328	2	1	TRUE
46	rs61999264	A	G	A	G	-0.344403	-0.0385	0.0127706	FALSE	FALSE	FALSE	3234_23_CCDC80_URB	0.036952	0.297465	35361	chr5	149246504	0.0745108	3.86141e-06	7096	5	149246504	GCST90277328	2	1	TRUE
47	rs62087966	G	A	G	A	0.498896	0.0158	0.00715911	FALSE	FALSE	FALSE	3234_23_CCDC80_URB	0.031263	0.613288	35327	chr18	369878	0.104611	1.88603e-06	7096	18	369878	GCST90277328	2	1	TRUE
48	rs627108	T	C	T	C	-0.0859253	-0.0033	0.395819	FALSE	FALSE	FALSE	3234_23_CCDC80_URB	0.008666	0.70334	35356	chr1	230174822	0.0171063	5.20439e-07	7096	1	230174822	GCST90277328	2	1	TRUE
49	rs76103105	A	G	A	G	-0.211515	-0.0192	0.0356681	FALSE	FALSE	FALSE	3234_23_CCDC80_URB	0.015718	0.221891	35374	chr10	4699577	0.045951	4.23479e-06	7096	10	4699577	GCST90277328	2	1	TRUE
50	rs77099066	A	G	A	G	-0.580106	0.0199	0.00467425	FALSE	FALSE	FALSE	3234_23_CCDC80_URB	0.030613	0.515658	35258	chr21	45199268	0.130745	9.25468e-06	7096	21	45199268	GCST90277328	2	1	TRUE
51	rs77172221	C	T	C	T	-0.137307	-0.0101	0.089828	FALSE	FALSE	FALSE	3234_23_CCDC80_URB	0.016833	0.548492	35363	chr12	23079509	0.0299203	4.52584e-06	7096	12	23079509	GCST90277328	2	1	TRUE
52	rs9666651	T	C	T	C	0.0846269	-0.0085	0.262591	FALSE	FALSE	FALSE	3234_23_CCDC80_URB	0.009257	0.358486	35378	chr11	34810889	0.0191322	9.85932e-06	7096	11	34810889	GCST90277328	2	1	TRUE
53	rs1077834	C	T	C	T	0.100473	-0.0084	0.266328	FALSE	FALSE	FALSE	6605_17_IGFALS_IGFALS	0.01021	0.410647	35365	chr15	58431280	0.0193402	2.10175e-07	7096	15	58431280	GCST90277328	2	1	TRUE
54	rs10859677	G	A	G	A	-0.0805653	0.0003	0.604843	FALSE	FALSE	FALSE	6605_17_IGFALS_IGFALS	0.009927	0.975892	35367	chr12	94142171	0.0176797	5.27349e-06	7096	12	94142171	GCST90277328	2	1	TRUE
55	rs114517755	C	A	C	A	0.652794	-0.0264	0.00510191	FALSE	FALSE	FALSE	6605_17_IGFALS_IGFALS	0.052801	0.617085	35353	chr2	181779530	0.129037	4.31377e-07	7096	2	181779530	GCST90277328	2	1	TRUE
56	rs117002628	A	G	A	G	0.510621	0.0018	0.00624671	FALSE	FALSE	FALSE	6605_17_IGFALS_IGFALS	0.049992	0.971278	35363	chr12	46480289	0.111133	4.40538e-06	7096	12	46480289	GCST90277328	2	1	TRUE
57	rs11918522	A	G	A	G	0.109339	-0.0056	0.158871	FALSE	FALSE	FALSE	6605_17_IGFALS_IGFALS	0.01166	0.631029	35363	chr3	112816210	0.0230214	2.0782e-06	7096	3	112816210	GCST90277328	2	1	TRUE
58	rs12426108	C	T	C	T	-0.147696	-0.0228	0.082789	FALSE	FALSE	FALSE	6605_17_IGFALS_IGFALS	0.019979	0.253784	35363	chr12	68489126	0.0306904	1.52135e-06	7096	12	68489126	GCST90277328	2	1	TRUE
59	rs13403377	T	C	T	C	0.0849022	0.0024	0.355901	FALSE	FALSE	FALSE	6605_17_IGFALS_IGFALS	0.00834	0.773511	35354	chr2	205953957	0.0175628	1.36381e-06	7096	2	205953957	GCST90277328	2	1	TRUE
60	rs138542536	C	A	C	A	-0.357113	-0.0096	0.0132828	FALSE	FALSE	FALSE	6605_17_IGFALS_IGFALS	0.030339	0.751682	35356	chr4	25796122	0.0791998	6.61281e-06	7096	4	25796122	GCST90277328	2	1	TRUE
61	rs139013784	A	G	A	G	-0.361357	0.0038	0.0116233	FALSE	FALSE	FALSE	6605_17_IGFALS_IGFALS	0.040227	0.92474	35362	chr17	50256987	0.0814729	9.3253e-06	7096	17	50256987	GCST90277328	2	1	TRUE
62	rs143533648	T	C	T	C	0.251731	0.0596	0.0261711	FALSE	FALSE	FALSE	6605_17_IGFALS_IGFALS	0.065214	0.360765	35354	chr2	214577935	0.0536185	2.71433e-06	7096	2	214577935	GCST90277328	2	1	TRUE
63	rs151236898	C	G	CTCCTGACTC	GTCCTGACTC	0.26584	-0.0114	0.0213116	TRUE	TRUE	TRUE	6605_17_IGFALS_IGFALS	0.030282	0.706573	35350	chr8	74189562	0.0582818	5.16487e-06	7096	8	74189562	GCST90277328	2	1	FALSE
64	rs1532085	G	A	G	A	-0.115334	0.0165	0.573441	FALSE	FALSE	FALSE	6605_17_IGFALS_IGFALS	0.008255	0.045637	35364	chr15	58391167	0.016874	8.87894e-12	7096	15	58391167	GCST90277328	2	1	TRUE
65	rs17194174	A	G	TCCATACAGAC	TCCACACAGAC	0.16511	0.0142	0.0590291	TRUE	FALSE	FALSE	6605_17_IGFALS_IGFALS	0.011442	0.214579	35444	chr6	30094129	0.0363759	5.74209e-06	7096	6	30094133	GCST90277328	2	1	FALSE
66	rs17231506	T	C	T	C	0.12842	0.0032	0.27829	FALSE	FALSE	FALSE	6605_17_IGFALS_IGFALS	0.008832	0.717122	35369	chr16	56960616	0.0185964	5.42067e-12	7096	16	56960616	GCST90277328	2	1	TRUE
67	rs180360	G	A	G	A	0.0860429	0.001	0.32354	FALSE	FALSE	FALSE	6605_17_IGFALS_IGFALS	0.0095	0.916165	35377	chr11	116728272	0.017959	1.69262e-06	7096	11	116728272	GCST90277328	2	1	TRUE
68	rs186412131	A	G	A	G	-0.207416	-0.048	0.0355509	FALSE	FALSE	FALSE	6605_17_IGFALS_IGFALS	0.091009	0.5979	35380	chr12	124792520	0.046059	6.79358e-06	7096	12	124792520	GCST90277328	2	1	TRUE
69	rs2670896	A	G	A	G	-0.23369	-0.0077	0.0302574	FALSE	FALSE	FALSE	6605_17_IGFALS_IGFALS	0.025167	0.759639	35363	chr3	129984722	0.0498075	2.75572e-06	7096	3	129984722	GCST90277328	2	1	TRUE
70	rs2977197	C	G	C	G	0.144489	0.0018	0.917825	FALSE	TRUE	TRUE	6605_17_IGFALS_IGFALS	0.014207	0.899177	35276	chr8	1742309	0.031219	3.75145e-06	7096	8	1742309	GCST90277328	2	1	FALSE
71	rs4237708	A	G	A	G	-0.126227	0.0084	0.889578	FALSE	FALSE	FALSE	6605_17_IGFALS_IGFALS	0.011105	0.449405	35370	chr11	15423060	0.0270132	3.02326e-06	7096	11	15423060	GCST90277328	2	1	TRUE
72	rs61999264	A	G	A	G	-0.344403	0.0177	0.0127706	FALSE	FALSE	FALSE	6605_17_IGFALS_IGFALS	0.036698	0.62958	35361	chr5	149246504	0.0745108	3.86141e-06	7096	5	149246504	GCST90277328	2	1	TRUE
73	rs62087966	G	A	G	A	0.498896	-0.0296	0.00715911	FALSE	FALSE	FALSE	6605_17_IGFALS_IGFALS	0.031076	0.340837	35327	chr18	369878	0.104611	1.88603e-06	7096	18	369878	GCST90277328	2	1	TRUE
74	rs627108	T	C	T	C	-0.0859253	0.0091	0.395819	FALSE	FALSE	FALSE	6605_17_IGFALS_IGFALS	0.008582	0.289005	35356	chr1	230174822	0.0171063	5.20439e-07	7096	1	230174822	GCST90277328	2	1	TRUE
75	rs76103105	A	G	A	G	-0.211515	-0.0098	0.0356681	FALSE	FALSE	FALSE	6605_17_IGFALS_IGFALS	0.015685	0.532094	35374	chr10	4699577	0.045951	4.23479e-06	7096	10	4699577	GCST90277328	2	1	TRUE
76	rs77099066	A	G	A	G	-0.580106	-0.0474	0.00467425	FALSE	FALSE	FALSE	6605_17_IGFALS_IGFALS	0.030606	0.121454	35258	chr21	45199268	0.130745	9.25468e-06	7096	21	45199268	GCST90277328	2	1	TRUE
77	rs77172221	C	T	C	T	-0.137307	0.0189	0.089828	FALSE	FALSE	FALSE	6605_17_IGFALS_IGFALS	0.016745	0.259033	35363	chr12	23079509	0.0299203	4.52584e-06	7096	12	23079509	GCST90277328	2	1	TRUE
78	rs9666651	T	C	T	C	0.0846269	0.0014	0.262591	FALSE	FALSE	FALSE	6605_17_IGFALS_IGFALS	0.008996	0.876335	35378	chr11	34810889	0.0191322	9.85932e-06	7096	11	34810889	GCST90277328	2	1	TRUE
	SNP	effect_allele.exposure	other_allele.exposure	effect_allele.outcome	other_allele.outcome	beta.exposure	beta.outcome	eaf.exposure	remove	palindromic	ambiguous	id.outcome	se.outcome	pval.outcome	samplesize.outcome	chr.outcome	pos.outcome	se.exposure	pval.exposure	samplesize.exposure	chr.exposure	pos.exposure	exposure	action	SNP_index	mr_keep
1	rs1077834	C	T	C	T	0.316338	-0.0069	0.266328	FALSE	FALSE	FALSE	3004_67_PDCD1LG2_PD_L2	0.010076	0.493452	35365	chr15	58431280	0.0211585	1.42225e-49	5462	15	58431280	GCST90277345	2	1	TRUE
2	rs117099105	C	G	C	G	0.458543	-0.0489	0.0108577	FALSE	TRUE	TRUE	3004_67_PDCD1LG2_PD_L2	0.036201	0.176762	35371	chr9	116846849	0.0976668	2.7284e-06	5462	9	116846849	GCST90277345	2	1	FALSE
3	rs12226389	C	T	C	T	0.117869	0.0009	0.172818	FALSE	FALSE	FALSE	3004_67_PDCD1LG2_PD_L2	0.010493	0.931647	35365	chr11	62056158	0.0252481	3.10862e-06	5462	11	62056158	GCST90277345	2	1	TRUE
4	rs1260326	C	T	C	T	-0.116253	0.0077	0.650878	FALSE	FALSE	FALSE	3004_67_PDCD1LG2_PD_L2	0.008553	0.367966	35373	chr2	27508073	0.0199252	5.6968e-09	5462	2	27508073	GCST90277345	2	1	TRUE
5	rs140904588	A	G	A	G	0.197431	-0.0073	0.0612194	FALSE	FALSE	FALSE	3004_67_PDCD1LG2_PD_L2	0.015861	0.645339	35365	chr2	11679202	0.0421589	2.88997e-06	5462	2	11679202	GCST90277345	2	1	TRUE
6	rs174564	G	A	G	A	0.307764	0.0106	0.409161	FALSE	FALSE	FALSE	3004_67_PDCD1LG2_PD_L2	0.008255	0.199119	35367	chr11	61820833	0.0189481	5.5786e-58	5462	11	61820833	GCST90277345	2	1	TRUE
7	rs1891637	T	C	T	C	-0.102494	0.0211	0.770925	FALSE	FALSE	FALSE	3004_67_PDCD1LG2_PD_L2	0.010136	0.037367	35360	chr9	123321244	0.0228828	7.63978e-06	5462	9	123321244	GCST90277345	2	1	TRUE
8	rs2043085	C	T	C	T	-0.26274	0.0092	0.576127	FALSE	FALSE	FALSE	3004_67_PDCD1LG2_PD_L2	0.00815	0.258996	35364	chr15	58388755	0.0187979	1.18331e-43	5462	15	58388755	GCST90277345	2	1	TRUE
9	rs34278620	G	A	G	A	0.225455	-0.0055	0.124967	FALSE	FALSE	FALSE	3004_67_PDCD1LG2_PD_L2	0.016893	0.744745	35373	chr15	59032191	0.0284816	2.94757e-15	5462	15	59032191	GCST90277345	2	1	TRUE
10	rs35319363	T	C	T	C	0.172777	-0.0082	0.0675969	FALSE	FALSE	FALSE	3004_67_PDCD1LG2_PD_L2	0.020332	0.686719	35353	chr5	163344530	0.0384064	6.97315e-06	5462	5	163344530	GCST90277345	2	1	TRUE
11	rs4129186	C	T	C	T	-0.153057	-0.0167	0.0956716	FALSE	FALSE	FALSE	3004_67_PDCD1LG2_PD_L2	0.013621	0.220193	35357	chr1	214395764	0.0329061	3.37382e-06	5462	1	214395764	GCST90277345	2	1	TRUE
12	rs4269529	C	T	C	T	-0.504437	-0.0208	0.00996045	FALSE	FALSE	FALSE	3004_67_PDCD1LG2_PD_L2	0.019731	0.291811	35358	chr8	66311811	0.0980369	2.75926e-07	5462	8	66311811	GCST90277345	2	1	TRUE
13	rs4363488	G	T	G	T	-0.109127	0.0058	0.811066	FALSE	FALSE	FALSE	3004_67_PDCD1LG2_PD_L2	0.009694	0.549634	35350	chr10	63102554	0.0244472	8.20349e-06	5462	10	63102554	GCST90277345	2	1	TRUE
14	rs436509	C	T	C	T	0.12194	-0.0008	0.851395	FALSE	FALSE	FALSE	3004_67_PDCD1LG2_PD_L2	0.010662	0.940189	34980	chr6	169389898	0.0269796	6.31639e-06	5462	6	169389898	GCST90277345	2	1	TRUE
15	rs510988	T	C	T	C	-0.146248	0.0191	0.828651	FALSE	FALSE	FALSE	3004_67_PDCD1LG2_PD_L2	0.01168	0.101995	35378	chr11	116943088	0.0252561	7.4007e-09	5462	11	116943088	GCST90277345	2	1	TRUE
16	rs544282	A	G	A	G	0.106103	-0.0098	0.279919	FALSE	FALSE	FALSE	3004_67_PDCD1LG2_PD_L2	0.011011	0.373472	35374	chr15	58729903	0.0211122	5.18152e-07	5462	15	58729903	GCST90277345	2	1	TRUE
17	rs61696472	G	A	G	A	0.0921553	0.0055	0.389961	FALSE	FALSE	FALSE	3004_67_PDCD1LG2_PD_L2	0.008399	0.512577	35356	chr7	43464229	0.0193641	1.99357e-06	5462	7	43464229	GCST90277345	2	1	TRUE
18	rs6415128	A	G	A	G	0.0901804	0.0082	0.662535	FALSE	FALSE	FALSE	3004_67_PDCD1LG2_PD_L2	0.008071	0.309662	35439	chr6	32363117	0.0201346	7.65098e-06	5462	6	32363117	GCST90277345	2	1	TRUE
19	rs7180275	G	A	G	A	-0.14187	-0.004	0.153405	FALSE	FALSE	FALSE	3004_67_PDCD1LG2_PD_L2	0.011465	0.727178	35360	chr15	74379820	0.0272752	2.05052e-07	5462	15	74379820	GCST90277345	2	1	TRUE
20	rs7550598	G	T	G	T	0.171106	-0.0331	0.0715109	FALSE	FALSE	FALSE	3004_67_PDCD1LG2_PD_L2	0.017909	0.06457	35381	chr1	15301756	0.0375177	5.20061e-06	5462	1	15301756	GCST90277345	2	1	TRUE
21	rs1077834	C	T	C	T	0.316338	0.001	0.266328	FALSE	FALSE	FALSE	3234_23_CCDC80_URB	0.010382	0.923263	35365	chr15	58431280	0.0211585	1.42225e-49	5462	15	58431280	GCST90277345	2	1	TRUE
22	rs117099105	C	G	C	G	0.458543	-0.0111	0.0108577	FALSE	TRUE	TRUE	3234_23_CCDC80_URB	0.036358	0.760138	35371	chr9	116846849	0.0976668	2.7284e-06	5462	9	116846849	GCST90277345	2	1	FALSE
23	rs12226389	C	T	C	T	0.117869	0.006	0.172818	FALSE	FALSE	FALSE	3234_23_CCDC80_URB	0.010463	0.566358	35365	chr11	62056158	0.0252481	3.10862e-06	5462	11	62056158	GCST90277345	2	1	TRUE
24	rs1260326	C	T	C	T	-0.116253	0.0251	0.650878	FALSE	FALSE	FALSE	3234_23_CCDC80_URB	0.008675	0.003811	35373	chr2	27508073	0.0199252	5.6968e-09	5462	2	27508073	GCST90277345	2	1	TRUE
25	rs140904588	A	G	A	G	0.197431	0.0107	0.0612194	FALSE	FALSE	FALSE	3234_23_CCDC80_URB	0.016224	0.509551	35365	chr2	11679202	0.0421589	2.88997e-06	5462	2	11679202	GCST90277345	2	1	TRUE
26	rs174564	G	A	G	A	0.307764	-0.003	0.409161	FALSE	FALSE	FALSE	3234_23_CCDC80_URB	0.008238	0.715732	35367	chr11	61820833	0.0189481	5.5786e-58	5462	11	61820833	GCST90277345	2	1	TRUE
27	rs1891637	T	C	T	C	-0.102494	0.016	0.770925	FALSE	FALSE	FALSE	3234_23_CCDC80_URB	0.010195	0.116568	35360	chr9	123321244	0.0228828	7.63978e-06	5462	9	123321244	GCST90277345	2	1	TRUE
28	rs2043085	C	T	C	T	-0.26274	0.0053	0.576127	FALSE	FALSE	FALSE	3234_23_CCDC80_URB	0.008242	0.520197	35364	chr15	58388755	0.0187979	1.18331e-43	5462	15	58388755	GCST90277345	2	1	TRUE
29	rs34278620	G	A	G	A	0.225455	0.0221	0.124967	FALSE	FALSE	FALSE	3234_23_CCDC80_URB	0.017237	0.199806	35373	chr15	59032191	0.0284816	2.94757e-15	5462	15	59032191	GCST90277345	2	1	TRUE
30	rs35319363	T	C	T	C	0.172777	0.0066	0.0675969	FALSE	FALSE	FALSE	3234_23_CCDC80_URB	0.020717	0.750049	35353	chr5	163344530	0.0384064	6.97315e-06	5462	5	163344530	GCST90277345	2	1	TRUE
31	rs4129186	C	T	C	T	-0.153057	-0.0124	0.0956716	FALSE	FALSE	FALSE	3234_23_CCDC80_URB	0.013797	0.368781	35357	chr1	214395764	0.0329061	3.37382e-06	5462	1	214395764	GCST90277345	2	1	TRUE
32	rs4269529	C	T	C	T	-0.504437	-0.0268	0.00996045	FALSE	FALSE	FALSE	3234_23_CCDC80_URB	0.020008	0.180411	35358	chr8	66311811	0.0980369	2.75926e-07	5462	8	66311811	GCST90277345	2	1	TRUE
33	rs4363488	G	T	G	T	-0.109127	0.006	0.811066	FALSE	FALSE	FALSE	3234_23_CCDC80_URB	0.009894	0.544214	35350	chr10	63102554	0.0244472	8.20349e-06	5462	10	63102554	GCST90277345	2	1	TRUE
34	rs436509	C	T	C	T	0.12194	0.0088	0.851395	FALSE	FALSE	FALSE	3234_23_CCDC80_URB	0.010301	0.392931	34980	chr6	169389898	0.0269796	6.31639e-06	5462	6	169389898	GCST90277345	2	1	TRUE
35	rs510988	T	C	T	C	-0.146248	-0.0067	0.828651	FALSE	FALSE	FALSE	3234_23_CCDC80_URB	0.01186	0.572133	35378	chr11	116943088	0.0252561	7.4007e-09	5462	11	116943088	GCST90277345	2	1	TRUE
36	rs544282	A	G	A	G	0.106103	-0.0043	0.279919	FALSE	FALSE	FALSE	3234_23_CCDC80_URB	0.011082	0.697991	35374	chr15	58729903	0.0211122	5.18152e-07	5462	15	58729903	GCST90277345	2	1	TRUE
37	rs61696472	G	A	G	A	0.0921553	0.0032	0.389961	FALSE	FALSE	FALSE	3234_23_CCDC80_URB	0.00839	0.702904	35356	chr7	43464229	0.0193641	1.99357e-06	5462	7	43464229	GCST90277345	2	1	TRUE
38	rs6415128	A	G	A	G	0.0901804	0.0025	0.662535	FALSE	FALSE	FALSE	3234_23_CCDC80_URB	0.00832	0.763799	35439	chr6	32363117	0.0201346	7.65098e-06	5462	6	32363117	GCST90277345	2	1	TRUE
39	rs7180275	G	A	G	A	-0.14187	-0.0068	0.153405	FALSE	FALSE	FALSE	3234_23_CCDC80_URB	0.011464	0.553068	35360	chr15	74379820	0.0272752	2.05052e-07	5462	15	74379820	GCST90277345	2	1	TRUE
40	rs7550598	G	T	G	T	0.171106	-0.0298	0.0715109	FALSE	FALSE	FALSE	3234_23_CCDC80_URB	0.018155	0.100717	35381	chr1	15301756	0.0375177	5.20061e-06	5462	1	15301756	GCST90277345	2	1	TRUE
41	rs1077834	C	T	C	T	0.316338	-0.0084	0.266328	FALSE	FALSE	FALSE	6605_17_IGFALS_IGFALS	0.01021	0.410647	35365	chr15	58431280	0.0211585	1.42225e-49	5462	15	58431280	GCST90277345	2	1	TRUE
42	rs117099105	C	G	C	G	0.458543	-0.0058	0.0108577	FALSE	TRUE	TRUE	6605_17_IGFALS_IGFALS	0.036616	0.874141	35371	chr9	116846849	0.0976668	2.7284e-06	5462	9	116846849	GCST90277345	2	1	FALSE
43	rs12226389	C	T	C	T	0.117869	-0.0039	0.172818	FALSE	FALSE	FALSE	6605_17_IGFALS_IGFALS	0.010497	0.71025	35365	chr11	62056158	0.0252481	3.10862e-06	5462	11	62056158	GCST90277345	2	1	TRUE
44	rs1260326	C	T	C	T	-0.116253	-0.0331	0.650878	FALSE	FALSE	FALSE	6605_17_IGFALS_IGFALS	0.008638	0.0001271	35373	chr2	27508073	0.0199252	5.6968e-09	5462	2	27508073	GCST90277345	2	1	TRUE
45	rs140904588	A	G	A	G	0.197431	-0.0057	0.0612194	FALSE	FALSE	FALSE	6605_17_IGFALS_IGFALS	0.016032	0.722194	35365	chr2	11679202	0.0421589	2.88997e-06	5462	2	11679202	GCST90277345	2	1	TRUE
46	rs174564	G	A	G	A	0.307764	0.0213	0.409161	FALSE	FALSE	FALSE	6605_17_IGFALS_IGFALS	0.008321	0.010477	35367	chr11	61820833	0.0189481	5.5786e-58	5462	11	61820833	GCST90277345	2	1	TRUE
47	rs1891637	T	C	T	C	-0.102494	0.0137	0.770925	FALSE	FALSE	FALSE	6605_17_IGFALS_IGFALS	0.010184	0.178542	35360	chr9	123321244	0.0228828	7.63978e-06	5462	9	123321244	GCST90277345	2	1	TRUE
48	rs2043085	C	T	C	T	-0.26274	0.0167	0.576127	FALSE	FALSE	FALSE	6605_17_IGFALS_IGFALS	0.008268	0.043413	35364	chr15	58388755	0.0187979	1.18331e-43	5462	15	58388755	GCST90277345	2	1	TRUE
49	rs34278620	G	A	G	A	0.225455	0.0281	0.124967	FALSE	FALSE	FALSE	6605_17_IGFALS_IGFALS	0.017173	0.101771	35373	chr15	59032191	0.0284816	2.94757e-15	5462	15	59032191	GCST90277345	2	1	TRUE
50	rs35319363	T	C	T	C	0.172777	-0.0364	0.0675969	FALSE	FALSE	FALSE	6605_17_IGFALS_IGFALS	0.020552	0.076542	35353	chr5	163344530	0.0384064	6.97315e-06	5462	5	163344530	GCST90277345	2	1	TRUE
51	rs4129186	C	T	C	T	-0.153057	-0.0275	0.0956716	FALSE	FALSE	FALSE	6605_17_IGFALS_IGFALS	0.013811	0.046467	35357	chr1	214395764	0.0329061	3.37382e-06	5462	1	214395764	GCST90277345	2	1	TRUE
52	rs4269529	C	T	C	T	-0.504437	0.0056	0.00996045	FALSE	FALSE	FALSE	6605_17_IGFALS_IGFALS	0.020109	0.780646	35358	chr8	66311811	0.0980369	2.75926e-07	5462	8	66311811	GCST90277345	2	1	TRUE
53	rs4363488	G	T	G	T	-0.109127	0.012	0.811066	FALSE	FALSE	FALSE	6605_17_IGFALS_IGFALS	0.009892	0.225097	35350	chr10	63102554	0.0244472	8.20349e-06	5462	10	63102554	GCST90277345	2	1	TRUE
54	rs436509	C	T	C	T	0.12194	0.0183	0.851395	FALSE	FALSE	FALSE	6605_17_IGFALS_IGFALS	0.01031	0.075897	34980	chr6	169389898	0.0269796	6.31639e-06	5462	6	169389898	GCST90277345	2	1	TRUE
55	rs510988	T	C	T	C	-0.146248	0.0005	0.828651	FALSE	FALSE	FALSE	6605_17_IGFALS_IGFALS	0.012483	0.968049	35378	chr11	116943088	0.0252561	7.4007e-09	5462	11	116943088	GCST90277345	2	1	TRUE
56	rs544282	A	G	A	G	0.106103	-0.0002	0.279919	FALSE	FALSE	FALSE	6605_17_IGFALS_IGFALS	0.010888	0.985344	35374	chr15	58729903	0.0211122	5.18152e-07	5462	15	58729903	GCST90277345	2	1	TRUE
57	rs61696472	G	A	G	A	0.0921553	-0.0088	0.389961	FALSE	FALSE	FALSE	6605_17_IGFALS_IGFALS	0.008451	0.297756	35356	chr7	43464229	0.0193641	1.99357e-06	5462	7	43464229	GCST90277345	2	1	TRUE
58	rs6415128	A	G	A	G	0.0901804	0.0111	0.662535	FALSE	FALSE	FALSE	6605_17_IGFALS_IGFALS	0.008155	0.173461	35439	chr6	32363117	0.0201346	7.65098e-06	5462	6	32363117	GCST90277345	2	1	TRUE
59	rs7180275	G	A	G	A	-0.14187	-0.0333	0.153405	FALSE	FALSE	FALSE	6605_17_IGFALS_IGFALS	0.011451	0.003638	35360	chr15	74379820	0.0272752	2.05052e-07	5462	15	74379820	GCST90277345	2	1	TRUE
60	rs7550598	G	T	G	T	0.171106	0.0099	0.0715109	FALSE	FALSE	FALSE	6605_17_IGFALS_IGFALS	0.018138	0.585183	35381	chr1	15301756	0.0375177	5.20061e-06	5462	1	15301756	GCST90277345	2	1	TRUE
	SNP	effect_allele.exposure	other_allele.exposure	effect_allele.outcome	other_allele.outcome	beta.exposure	beta.outcome	eaf.exposure	remove	palindromic	ambiguous	id.outcome	se.outcome	pval.outcome	samplesize.outcome	chr.outcome	pos.outcome	se.exposure	pval.exposure	samplesize.exposure	chr.exposure	pos.exposure	exposure	action	SNP_index	mr_keep
1	rs10141087	C	G	CGTCTG	GGTCTG	-0.0890577	-0.0033	0.615301	TRUE	TRUE	TRUE	3004_67_PDCD1LG2_PD_L2	0.008113	0.684194	35356	chr14	36678136	0.019626	5.80341e-06	5463	14	36678136	GCST90277381	2	1	FALSE
2	rs10218823	T	G	T	G	-0.351728	0.0184	0.0174192	FALSE	FALSE	FALSE	3004_67_PDCD1LG2_PD_L2	0.028476	0.518182	35384	chr1	6029418	0.0758644	3.63201e-06	5463	1	6029418	GCST90277381	2	1	TRUE
3	rs10425025	A	T	A	T	0.304802	0.0342	0.0226916	FALSE	TRUE	TRUE	3004_67_PDCD1LG2_PD_L2	0.019725	0.08294	35377	chr19	9009145	0.0664195	4.54841e-06	5463	19	9009145	GCST90277381	2	1	FALSE
4	rs117264209	G	C	G	C	-0.331464	-0.007	0.0189929	FALSE	TRUE	TRUE	3004_67_PDCD1LG2_PD_L2	0.02362	0.766959	35284	chr9	135992678	0.0724324	4.83672e-06	5463	9	135992678	GCST90277381	2	1	FALSE
5	rs117945317	A	T	A	T	-0.474967	0.0029	0.00925935	FALSE	TRUE	TRUE	3004_67_PDCD1LG2_PD_L2	0.039558	0.94156	35377	chr8	11538263	0.107385	9.90856e-06	5463	8	11538263	GCST90277381	2	1	FALSE
6	rs140828820	G	A	TCCCGTC	TCCCGTT	0.42416	0.031	0.0106244	TRUE	FALSE	FALSE	3004_67_PDCD1LG2_PD_L2	0.049398	0.530293	35352	chr4	34767465	0.0948624	7.93444e-06	5463	4	34767471	GCST90277381	2	1	FALSE
7	rs2180528	T	C	T	C	0.0959045	0.0036	0.388548	FALSE	FALSE	FALSE	3004_67_PDCD1LG2_PD_L2	0.008184	0.660008	35379	chr20	15445391	0.0195284	9.31127e-07	5463	20	15445391	GCST90277381	2	1	TRUE
8	rs222507	T	G	T	G	-0.322724	0.0662	0.979086	FALSE	FALSE	FALSE	3004_67_PDCD1LG2_PD_L2	0.030582	0.030414	35364	chr12	101725095	0.0696589	3.68197e-06	5463	12	101725095	GCST90277381	2	1	TRUE
9	rs2242104	G	A	G	A	-0.102506	0.0201	0.751566	FALSE	FALSE	FALSE	3004_67_PDCD1LG2_PD_L2	0.008418	0.016954	35374	chr9	2640492	0.0222477	4.16402e-06	5463	9	2640492	GCST90277381	2	1	TRUE
10	rs3894049	G	C	G	C	0.0884814	-0.0077	0.522222	FALSE	TRUE	TRUE	3004_67_PDCD1LG2_PD_L2	0.008138	0.344053	34952	chr18	79524930	0.0198045	8.05823e-06	5463	18	79524930	GCST90277381	2	1	FALSE
11	rs4556833	C	A	C	A	-0.0892999	-0.0005	0.441013	FALSE	FALSE	FALSE	3004_67_PDCD1LG2_PD_L2	0.008433	0.952719	35367	chr17	53567083	0.0193709	4.11085e-06	5463	17	53567083	GCST90277381	2	1	TRUE
12	rs4955801	C	T	C	T	-0.10692	0.0097	0.784912	FALSE	FALSE	FALSE	3004_67_PDCD1LG2_PD_L2	0.009387	0.301453	35354	chr3	179092711	0.0231871	4.09029e-06	5463	3	179092711	GCST90277381	2	1	TRUE
13	rs60243822	C	A	C	A	0.114112	0.0249	0.171507	FALSE	FALSE	FALSE	3004_67_PDCD1LG2_PD_L2	0.012652	0.049056	35360	chr12	81637055	0.025521	7.92825e-06	5463	12	81637055	GCST90277381	2	1	TRUE
14	rs62235973	A	G	A	G	0.240897	-0.0003	0.0372407	FALSE	FALSE	FALSE	3004_67_PDCD1LG2_PD_L2	0.02067	0.98842	35369	chr22	37593713	0.051151	2.53989e-06	5463	22	37593713	GCST90277381	2	1	TRUE
15	rs62348866	A	G	A	G	-0.141277	-0.0157	0.118352	FALSE	FALSE	FALSE	3004_67_PDCD1LG2_PD_L2	0.011588	0.175447	35363	chr4	186453244	0.0296961	2.00948e-06	5463	4	186453244	GCST90277381	2	1	TRUE
16	rs73302224	C	T	C	T	0.517903	-0.0402	0.0074372	FALSE	FALSE	FALSE	3004_67_PDCD1LG2_PD_L2	0.055572	0.46944	35352	chr10	48593367	0.115804	7.88209e-06	5463	10	48593367	GCST90277381	2	1	TRUE
17	rs76375876	T	C	T	C	0.295929	-0.0299	0.0256501	FALSE	FALSE	FALSE	3004_67_PDCD1LG2_PD_L2	0.019304	0.121402	35375	chr19	49524378	0.0630857	2.78359e-06	5463	19	49524378	GCST90277381	2	1	TRUE
18	rs769432	T	C	T	C	0.0909888	-0.0014	0.509405	FALSE	FALSE	FALSE	3004_67_PDCD1LG2_PD_L2	0.008395	0.867557	35368	chr17	3420961	0.0191377	2.03696e-06	5463	17	3420961	GCST90277381	2	1	TRUE
19	rs7721676	C	T	C	T	-0.103686	-0.003	0.218108	FALSE	FALSE	FALSE	3004_67_PDCD1LG2_PD_L2	0.010476	0.774601	35368	chr5	149703644	0.023261	8.44778e-06	5463	5	149703644	GCST90277381	2	1	TRUE
20	rs79159286	G	T	G	T	0.162727	0.0026	0.0800417	FALSE	FALSE	FALSE	3004_67_PDCD1LG2_PD_L2	0.012787	0.838871	35366	chr7	31677697	0.0356791	5.20211e-06	5463	7	31677697	GCST90277381	2	1	TRUE
21	rs969816	G	A	G	A	0.133453	-0.0065	0.119786	FALSE	FALSE	FALSE	3004_67_PDCD1LG2_PD_L2	0.013338	0.62602	35353	chr2	210779037	0.0300456	9.09199e-06	5463	2	210779037	GCST90277381	2	1	TRUE
22	rs10141087	C	G	CGTCTG	GGTCTG	-0.0890577	-0.0113	0.615301	TRUE	TRUE	TRUE	3234_23_CCDC80_URB	0.008226	0.169528	35356	chr14	36678136	0.019626	5.80341e-06	5463	14	36678136	GCST90277381	2	1	FALSE
23	rs10218823	T	G	T	G	-0.351728	0.0044	0.0174192	FALSE	FALSE	FALSE	3234_23_CCDC80_URB	0.02878	0.878491	35384	chr1	6029418	0.0758644	3.63201e-06	5463	1	6029418	GCST90277381	2	1	TRUE
24	rs10425025	A	T	A	T	0.304802	-0.014	0.0226916	FALSE	TRUE	TRUE	3234_23_CCDC80_URB	0.019968	0.483235	35377	chr19	9009145	0.0664195	4.54841e-06	5463	19	9009145	GCST90277381	2	1	FALSE
25	rs117264209	G	C	G	C	-0.331464	-0.0181	0.0189929	FALSE	TRUE	TRUE	3234_23_CCDC80_URB	0.023724	0.445499	35284	chr9	135992678	0.0724324	4.83672e-06	5463	9	135992678	GCST90277381	2	1	FALSE
26	rs117945317	A	T	A	T	-0.474967	-0.0098	0.00925935	FALSE	TRUE	TRUE	3234_23_CCDC80_URB	0.039862	0.805801	35377	chr8	11538263	0.107385	9.90856e-06	5463	8	11538263	GCST90277381	2	1	FALSE
27	rs140828820	G	A	TCCCGTC	TCCCGTT	0.42416	-0.0259	0.0106244	TRUE	FALSE	FALSE	3234_23_CCDC80_URB	0.050081	0.605043	35352	chr4	34767465	0.0948624	7.93444e-06	5463	4	34767471	GCST90277381	2	1	FALSE
28	rs2180528	T	C	T	C	0.0959045	0.0008	0.388548	FALSE	FALSE	FALSE	3234_23_CCDC80_URB	0.008831	0.927821	35379	chr20	15445391	0.0195284	9.31127e-07	5463	20	15445391	GCST90277381	2	1	TRUE
29	rs222507	T	G	T	G	-0.322724	0.0542	0.979086	FALSE	FALSE	FALSE	3234_23_CCDC80_URB	0.031003	0.080426	35364	chr12	101725095	0.0696589	3.68197e-06	5463	12	101725095	GCST90277381	2	1	TRUE
30	rs2242104	G	A	G	A	-0.102506	0.0085	0.751566	FALSE	FALSE	FALSE	3234_23_CCDC80_URB	0.008454	0.314691	35374	chr9	2640492	0.0222477	4.16402e-06	5463	9	2640492	GCST90277381	2	1	TRUE
31	rs3894049	G	C	G	C	0.0884814	0.0021	0.522222	FALSE	TRUE	TRUE	3234_23_CCDC80_URB	0.008105	0.795559	34952	chr18	79524930	0.0198045	8.05823e-06	5463	18	79524930	GCST90277381	2	1	FALSE
32	rs4556833	C	A	C	A	-0.0892999	0.0021	0.441013	FALSE	FALSE	FALSE	3234_23_CCDC80_URB	0.00801	0.793198	35367	chr17	53567083	0.0193709	4.11085e-06	5463	17	53567083	GCST90277381	2	1	TRUE
33	rs4955801	C	T	C	T	-0.10692	0.0011	0.784912	FALSE	FALSE	FALSE	3234_23_CCDC80_URB	0.009433	0.907165	35354	chr3	179092711	0.0231871	4.09029e-06	5463	3	179092711	GCST90277381	2	1	TRUE
34	rs60243822	C	A	C	A	0.114112	-0.0104	0.171507	FALSE	FALSE	FALSE	3234_23_CCDC80_URB	0.01286	0.418696	35360	chr12	81637055	0.025521	7.92825e-06	5463	12	81637055	GCST90277381	2	1	TRUE
35	rs62235973	A	G	A	G	0.240897	0.0024	0.0372407	FALSE	FALSE	FALSE	3234_23_CCDC80_URB	0.01761	0.891595	35369	chr22	37593713	0.051151	2.53989e-06	5463	22	37593713	GCST90277381	2	1	TRUE
36	rs62348866	A	G	A	G	-0.141277	-0.0102	0.118352	FALSE	FALSE	FALSE	3234_23_CCDC80_URB	0.01168	0.382516	35363	chr4	186453244	0.0296961	2.00948e-06	5463	4	186453244	GCST90277381	2	1	TRUE
37	rs73302224	C	T	C	T	0.517903	-0.0492	0.0074372	FALSE	FALSE	FALSE	3234_23_CCDC80_URB	0.056332	0.38245	35352	chr10	48593367	0.115804	7.88209e-06	5463	10	48593367	GCST90277381	2	1	TRUE
38	rs76375876	T	C	T	C	0.295929	-0.0226	0.0256501	FALSE	FALSE	FALSE	3234_23_CCDC80_URB	0.019637	0.24977	35375	chr19	49524378	0.0630857	2.78359e-06	5463	19	49524378	GCST90277381	2	1	TRUE
39	rs769432	T	C	T	C	0.0909888	0.0064	0.509405	FALSE	FALSE	FALSE	3234_23_CCDC80_URB	0.008413	0.446832	35368	chr17	3420961	0.0191377	2.03696e-06	5463	17	3420961	GCST90277381	2	1	TRUE
40	rs7721676	C	T	C	T	-0.103686	-0.0029	0.218108	FALSE	FALSE	FALSE	3234_23_CCDC80_URB	0.010416	0.780688	35368	chr5	149703644	0.023261	8.44778e-06	5463	5	149703644	GCST90277381	2	1	TRUE
41	rs79159286	G	T	G	T	0.162727	-0.0072	0.0800417	FALSE	FALSE	FALSE	3234_23_CCDC80_URB	0.012823	0.574456	35366	chr7	31677697	0.0356791	5.20211e-06	5463	7	31677697	GCST90277381	2	1	TRUE
42	rs969816	G	A	G	A	0.133453	-0.0031	0.119786	FALSE	FALSE	FALSE	3234_23_CCDC80_URB	0.013668	0.82057	35353	chr2	210779037	0.0300456	9.09199e-06	5463	2	210779037	GCST90277381	2	1	TRUE
43	rs10141087	C	G	CGTCTG	GGTCTG	-0.0890577	-0.0093	0.615301	TRUE	TRUE	TRUE	6605_17_IGFALS_IGFALS	0.00817	0.254966	35356	chr14	36678136	0.019626	5.80341e-06	5463	14	36678136	GCST90277381	2	1	FALSE
44	rs10218823	T	G	T	G	-0.351728	0.0014	0.0174192	FALSE	FALSE	FALSE	6605_17_IGFALS_IGFALS	0.029109	0.961641	35384	chr1	6029418	0.0758644	3.63201e-06	5463	1	6029418	GCST90277381	2	1	TRUE
45	rs10425025	A	T	A	T	0.304802	-0.002	0.0226916	FALSE	TRUE	TRUE	6605_17_IGFALS_IGFALS	0.019995	0.920323	35377	chr19	9009145	0.0664195	4.54841e-06	5463	19	9009145	GCST90277381	2	1	FALSE
46	rs117264209	G	C	G	C	-0.331464	-0.015	0.0189929	FALSE	TRUE	TRUE	6605_17_IGFALS_IGFALS	0.023586	0.524789	35284	chr9	135992678	0.0724324	4.83672e-06	5463	9	135992678	GCST90277381	2	1	FALSE
47	rs117945317	A	T	A	T	-0.474967	0.0327	0.00925935	FALSE	TRUE	TRUE	6605_17_IGFALS_IGFALS	0.039735	0.410535	35377	chr8	11538263	0.107385	9.90856e-06	5463	8	11538263	GCST90277381	2	1	FALSE
48	rs140828820	G	A	TCCCGTC	TCCCGTT	0.42416	0.0046	0.0106244	TRUE	FALSE	FALSE	6605_17_IGFALS_IGFALS	0.05041	0.927292	35352	chr4	34767465	0.0948624	7.93444e-06	5463	4	34767471	GCST90277381	2	1	FALSE
49	rs2180528	T	C	T	C	0.0959045	-0.0051	0.388548	FALSE	FALSE	FALSE	6605_17_IGFALS_IGFALS	0.008285	0.53818	35379	chr20	15445391	0.0195284	9.31127e-07	5463	20	15445391	GCST90277381	2	1	TRUE
50	rs222507	T	G	T	G	-0.322724	0.0204	0.979086	FALSE	FALSE	FALSE	6605_17_IGFALS_IGFALS	0.030867	0.50868	35364	chr12	101725095	0.0696589	3.68197e-06	5463	12	101725095	GCST90277381	2	1	TRUE
51	rs2242104	G	A	G	A	-0.102506	0.01	0.751566	FALSE	FALSE	FALSE	6605_17_IGFALS_IGFALS	0.008413	0.23456	35374	chr9	2640492	0.0222477	4.16402e-06	5463	9	2640492	GCST90277381	2	1	TRUE
52	rs3894049	G	C	G	C	0.0884814	-0.003	0.522222	FALSE	TRUE	TRUE	6605_17_IGFALS_IGFALS	0.00826	0.716443	34952	chr18	79524930	0.0198045	8.05823e-06	5463	18	79524930	GCST90277381	2	1	FALSE
53	rs4556833	C	A	C	A	-0.0892999	-0.002	0.441013	FALSE	FALSE	FALSE	6605_17_IGFALS_IGFALS	0.008281	0.809153	35367	chr17	53567083	0.0193709	4.11085e-06	5463	17	53567083	GCST90277381	2	1	TRUE
54	rs4955801	C	T	C	T	-0.10692	0.0062	0.784912	FALSE	FALSE	FALSE	6605_17_IGFALS_IGFALS	0.009461	0.512243	35354	chr3	179092711	0.0231871	4.09029e-06	5463	3	179092711	GCST90277381	2	1	TRUE
55	rs60243822	C	A	C	A	0.114112	-0.0134	0.171507	FALSE	FALSE	FALSE	6605_17_IGFALS_IGFALS	0.012789	0.294748	35360	chr12	81637055	0.025521	7.92825e-06	5463	12	81637055	GCST90277381	2	1	TRUE
56	rs62235973	A	G	A	G	0.240897	0.0266	0.0372407	FALSE	FALSE	FALSE	6605_17_IGFALS_IGFALS	0.017418	0.126723	35369	chr22	37593713	0.051151	2.53989e-06	5463	22	37593713	GCST90277381	2	1	TRUE
57	rs62348866	A	G	A	G	-0.141277	0.0168	0.118352	FALSE	FALSE	FALSE	6605_17_IGFALS_IGFALS	0.01169	0.150671	35363	chr4	186453244	0.0296961	2.00948e-06	5463	4	186453244	GCST90277381	2	1	TRUE
58	rs73302224	C	T	C	T	0.517903	0.0015	0.0074372	FALSE	FALSE	FALSE	6605_17_IGFALS_IGFALS	0.054813	0.978168	35352	chr10	48593367	0.115804	7.88209e-06	5463	10	48593367	GCST90277381	2	1	TRUE
59	rs76375876	T	C	T	C	0.295929	0.0055	0.0256501	FALSE	FALSE	FALSE	6605_17_IGFALS_IGFALS	0.019604	0.779047	35375	chr19	49524378	0.0630857	2.78359e-06	5463	19	49524378	GCST90277381	2	1	TRUE
60	rs769432	T	C	T	C	0.0909888	-0.0026	0.509405	FALSE	FALSE	FALSE	6605_17_IGFALS_IGFALS	0.008537	0.760698	35368	chr17	3420961	0.0191377	2.03696e-06	5463	17	3420961	GCST90277381	2	1	TRUE
61	rs7721676	C	T	C	T	-0.103686	-0.0058	0.218108	FALSE	FALSE	FALSE	6605_17_IGFALS_IGFALS	0.010436	0.578353	35368	chr5	149703644	0.023261	8.44778e-06	5463	5	149703644	GCST90277381	2	1	TRUE
62	rs79159286	G	T	G	T	0.162727	0.0147	0.0800417	FALSE	FALSE	FALSE	6605_17_IGFALS_IGFALS	0.01285	0.252638	35366	chr7	31677697	0.0356791	5.20211e-06	5463	7	31677697	GCST90277381	2	1	TRUE
63	rs969816	G	A	G	A	0.133453	-0.0075	0.119786	FALSE	FALSE	FALSE	6605_17_IGFALS_IGFALS	0.013433	0.576621	35353	chr2	210779037	0.0300456	9.09199e-06	5463	2	210779037	GCST90277381	2	1	TRUE
	SNP	effect_allele.exposure	other_allele.exposure	effect_allele.outcome	other_allele.outcome	beta.exposure	beta.outcome	eaf.exposure	remove	palindromic	ambiguous	id.outcome	se.outcome	pval.outcome	samplesize.outcome	chr.outcome	pos.outcome	se.exposure	pval.exposure	samplesize.exposure	chr.exposure	pos.exposure	exposure	action	SNP_index	mr_keep
1	rs102275	C	T	C	T	-0.159446	0.01	0.410377	FALSE	FALSE	FALSE	3004_67_PDCD1LG2_PD_L2	0.008241	0.22498	35367	chr11	61790331	0.0196487	5.95425e-16	5403	11	61790331	GCST90277415	2	1	TRUE
2	rs111473971	A	G	A	G	0.137662	0.0009	0.120696	FALSE	FALSE	FALSE	3004_67_PDCD1LG2_PD_L2	0.014249	0.949637	35354	chr19	21652047	0.0301588	5.11112e-06	5403	19	21652047	GCST90277415	2	1	TRUE
3	rs117926062	T	G	T	G	-0.454315	0.024	0.00880125	FALSE	FALSE	FALSE	3004_67_PDCD1LG2_PD_L2	0.037257	0.519462	35371	chr6	138930517	0.101433	7.65097e-06	5403	6	138930517	GCST90277415	2	1	TRUE
4	rs1258712	T	G	T	G	0.179876	-0.0142	0.931291	FALSE	FALSE	FALSE	3004_67_PDCD1LG2_PD_L2	0.016649	0.393724	35356	chr12	31313616	0.0390006	4.07746e-06	5403	12	31313616	GCST90277415	2	1	TRUE
5	rs1260326	C	T	C	T	-0.119307	0.0077	0.650878	FALSE	FALSE	FALSE	3004_67_PDCD1LG2_PD_L2	0.008553	0.367966	35373	chr2	27508073	0.020014	2.65937e-09	5403	2	27508073	GCST90277415	2	1	TRUE
6	rs12700064	A	G	A	G	0.158017	-0.0067	0.900243	FALSE	FALSE	FALSE	3004_67_PDCD1LG2_PD_L2	0.013769	0.626554	35375	chr7	19617082	0.0332937	2.12452e-06	5403	7	19617082	GCST90277415	2	1	TRUE
7	rs141765432	T	G	T	G	-0.262605	-0.062	0.0353416	FALSE	FALSE	FALSE	3004_67_PDCD1LG2_PD_L2	0.039082	0.112651	35355	chr14	76516128	0.0532405	8.3579e-07	5403	14	76516128	GCST90277415	2	1	TRUE
8	rs145956593	A	G	A	G	-0.122294	-0.0172	0.141292	FALSE	FALSE	FALSE	3004_67_PDCD1LG2_PD_L2	0.010943	0.116004	35357	chr11	88458623	0.0275161	8.9742e-06	5403	11	88458623	GCST90277415	2	1	TRUE
9	rs150578762	A	G	A	G	0.155108	0.0129	0.0942658	FALSE	FALSE	FALSE	3004_67_PDCD1LG2_PD_L2	0.016755	0.441337	35377	chr22	28083968	0.0329203	2.5171e-06	5403	22	28083968	GCST90277415	2	1	TRUE
10	rs15285	T	C	T	C	-0.123238	-0.0195	0.261072	FALSE	FALSE	FALSE	3004_67_PDCD1LG2_PD_L2	0.008859	0.027728	35368	chr8	19967156	0.0219238	1.98902e-08	5403	8	19967156	GCST90277415	2	1	TRUE
11	rs187429064	G	A	G	A	-0.215689	-0.0215	0.0535314	FALSE	FALSE	FALSE	3004_67_PDCD1LG2_PD_L2	0.051753	0.677826	35353	chr19	19269704	0.0449055	1.60185e-06	5403	19	19269704	GCST90277415	2	1	TRUE
12	rs1883350	C	T	C	T	0.114462	0.0033	0.39119	FALSE	FALSE	FALSE	3004_67_PDCD1LG2_PD_L2	0.009029	0.714735	35372	chr22	43932163	0.019659	6.12587e-09	5403	22	43932163	GCST90277415	2	1	TRUE
13	rs3011337	G	A	G	A	0.099104	0.0143	0.673295	FALSE	FALSE	FALSE	3004_67_PDCD1LG2_PD_L2	0.008454	0.090743	35380	chr10	120774281	0.0207589	1.85071e-06	5403	10	120774281	GCST90277415	2	1	TRUE
14	rs34621709	A	C	A	C	0.111496	0.0032	0.18474	FALSE	FALSE	FALSE	3004_67_PDCD1LG2_PD_L2	0.011292	0.776883	35352	chr1	220806736	0.0249667	8.13221e-06	5403	1	220806736	GCST90277415	2	1	TRUE
15	rs371927	A	G	A	G	-0.177294	0.0067	0.914919	FALSE	FALSE	FALSE	3004_67_PDCD1LG2_PD_L2	0.013403	0.61715	35370	chr20	44634395	0.0368155	1.50497e-06	5403	20	44634395	GCST90277415	2	1	TRUE
16	rs445925	A	G	A	G	0.220749	0.0391	0.0774371	FALSE	FALSE	FALSE	3004_67_PDCD1LG2_PD_L2	0.014228	0.005995	35368	chr19	44912383	0.0354449	5.07593e-10	5403	19	44912383	GCST90277415	2	1	TRUE
17	rs592586	G	A	G	A	0.0911776	-0.0083	0.594684	FALSE	FALSE	FALSE	3004_67_PDCD1LG2_PD_L2	0.008113	0.30626	35345	chr1	109650768	0.0194751	2.91145e-06	5403	1	109650768	GCST90277415	2	1	TRUE
18	rs62209231	C	T	C	T	0.0879061	0.0086	0.353942	FALSE	FALSE	FALSE	3004_67_PDCD1LG2_PD_L2	0.008836	0.330412	35381	chr20	13843242	0.0197898	9.08246e-06	5403	20	13843242	GCST90277415	2	1	TRUE
19	rs67076780	T	C	T	C	-0.282473	0.022	0.0238689	FALSE	FALSE	FALSE	3004_67_PDCD1LG2_PD_L2	0.020326	0.2791	34994	chr18	78936828	0.0627095	6.78798e-06	5403	18	78936828	GCST90277415	2	1	TRUE
20	rs75214296	G	A	G	A	0.12509	-0.0133	0.138223	FALSE	FALSE	FALSE	3004_67_PDCD1LG2_PD_L2	0.012195	0.27545	35357	chr12	43836589	0.0275958	5.93685e-06	5403	12	43836589	GCST90277415	2	1	TRUE
21	rs7764213	C	T	C	T	0.108108	0.014	0.195241	FALSE	FALSE	FALSE	3004_67_PDCD1LG2_PD_L2	0.009109	0.124291	35370	chr6	112137404	0.0241647	7.83461e-06	5403	6	112137404	GCST90277415	2	1	TRUE
22	rs964184	C	G	C	G	-0.210452	-0.0019	0.848991	FALSE	TRUE	TRUE	3004_67_PDCD1LG2_PD_L2	0.012099	0.875211	35377	chr11	116778201	0.026272	1.38406e-15	5403	11	116778201	GCST90277415	2	1	FALSE
23	rs102275	C	T	C	T	-0.159446	-0.0039	0.410377	FALSE	FALSE	FALSE	3234_23_CCDC80_URB	0.008386	0.641874	35367	chr11	61790331	0.0196487	5.95425e-16	5403	11	61790331	GCST90277415	2	1	TRUE
24	rs111473971	A	G	A	G	0.137662	-0.0036	0.120696	FALSE	FALSE	FALSE	3234_23_CCDC80_URB	0.01375	0.793458	35354	chr19	21652047	0.0301588	5.11112e-06	5403	19	21652047	GCST90277415	2	1	TRUE
25	rs117926062	T	G	T	G	-0.454315	-0.052	0.00880125	FALSE	FALSE	FALSE	3234_23_CCDC80_URB	0.037768	0.168561	35371	chr6	138930517	0.101433	7.65097e-06	5403	6	138930517	GCST90277415	2	1	TRUE
26	rs1258712	T	G	T	G	0.179876	0.0087	0.931291	FALSE	FALSE	FALSE	3234_23_CCDC80_URB	0.016962	0.608022	35356	chr12	31313616	0.0390006	4.07746e-06	5403	12	31313616	GCST90277415	2	1	TRUE
27	rs1260326	C	T	C	T	-0.119307	0.0251	0.650878	FALSE	FALSE	FALSE	3234_23_CCDC80_URB	0.008675	0.003811	35373	chr2	27508073	0.020014	2.65937e-09	5403	2	27508073	GCST90277415	2	1	TRUE
28	rs12700064	A	G	A	G	0.158017	0.0128	0.900243	FALSE	FALSE	FALSE	3234_23_CCDC80_URB	0.013891	0.356803	35375	chr7	19617082	0.0332937	2.12452e-06	5403	7	19617082	GCST90277415	2	1	TRUE
29	rs141765432	T	G	T	G	-0.262605	-0.0364	0.0353416	FALSE	FALSE	FALSE	3234_23_CCDC80_URB	0.039613	0.358154	35355	chr14	76516128	0.0532405	8.3579e-07	5403	14	76516128	GCST90277415	2	1	TRUE
30	rs145956593	A	G	A	G	-0.122294	-0.0113	0.141292	FALSE	FALSE	FALSE	3234_23_CCDC80_URB	0.011102	0.308742	35357	chr11	88458623	0.0275161	8.9742e-06	5403	11	88458623	GCST90277415	2	1	TRUE
31	rs150578762	A	G	A	G	0.155108	0.0048	0.0942658	FALSE	FALSE	FALSE	3234_23_CCDC80_URB	0.01704	0.778179	35377	chr22	28083968	0.0329203	2.5171e-06	5403	22	28083968	GCST90277415	2	1	TRUE
32	rs15285	T	C	T	C	-0.123238	0.004	0.261072	FALSE	FALSE	FALSE	3234_23_CCDC80_URB	0.009035	0.657958	35368	chr8	19967156	0.0219238	1.98902e-08	5403	8	19967156	GCST90277415	2	1	TRUE
33	rs187429064	G	A	G	A	-0.215689	-0.0379	0.0535314	FALSE	FALSE	FALSE	3234_23_CCDC80_URB	0.052577	0.471006	35353	chr19	19269704	0.0449055	1.60185e-06	5403	19	19269704	GCST90277415	2	1	TRUE
34	rs1883350	C	T	C	T	0.114462	0.0083	0.39119	FALSE	FALSE	FALSE	3234_23_CCDC80_URB	0.009142	0.363921	35372	chr22	43932163	0.019659	6.12587e-09	5403	22	43932163	GCST90277415	2	1	TRUE
35	rs3011337	G	A	G	A	0.099104	0.0031	0.673295	FALSE	FALSE	FALSE	3234_23_CCDC80_URB	0.008498	0.715261	35380	chr10	120774281	0.0207589	1.85071e-06	5403	10	120774281	GCST90277415	2	1	TRUE
36	rs34621709	A	C	A	C	0.111496	0.0016	0.18474	FALSE	FALSE	FALSE	3234_23_CCDC80_URB	0.011218	0.886583	35352	chr1	220806736	0.0249667	8.13221e-06	5403	1	220806736	GCST90277415	2	1	TRUE
37	rs371927	A	G	A	G	-0.177294	0.023	0.914919	FALSE	FALSE	FALSE	3234_23_CCDC80_URB	0.013464	0.087582	35370	chr20	44634395	0.0368155	1.50497e-06	5403	20	44634395	GCST90277415	2	1	TRUE
38	rs445925	A	G	A	G	0.220749	0.0553	0.0774371	FALSE	FALSE	FALSE	3234_23_CCDC80_URB	0.014429	0.0001268	35368	chr19	44912383	0.0354449	5.07593e-10	5403	19	44912383	GCST90277415	2	1	TRUE
39	rs592586	G	A	G	A	0.0911776	-0.0031	0.594684	FALSE	FALSE	FALSE	3234_23_CCDC80_URB	0.008199	0.705368	35345	chr1	109650768	0.0194751	2.91145e-06	5403	1	109650768	GCST90277415	2	1	TRUE
40	rs62209231	C	T	C	T	0.0879061	0.0063	0.353942	FALSE	FALSE	FALSE	3234_23_CCDC80_URB	0.008985	0.483196	35381	chr20	13843242	0.0197898	9.08246e-06	5403	20	13843242	GCST90277415	2	1	TRUE
41	rs67076780	T	C	T	C	-0.282473	0.0256	0.0238689	FALSE	FALSE	FALSE	3234_23_CCDC80_URB	0.020607	0.214123	34994	chr18	78936828	0.0627095	6.78798e-06	5403	18	78936828	GCST90277415	2	1	TRUE
42	rs75214296	G	A	G	A	0.12509	-0.0134	0.138223	FALSE	FALSE	FALSE	3234_23_CCDC80_URB	0.012352	0.277993	35357	chr12	43836589	0.0275958	5.93685e-06	5403	12	43836589	GCST90277415	2	1	TRUE
43	rs7764213	C	T	C	T	0.108108	-0.0102	0.195241	FALSE	FALSE	FALSE	3234_23_CCDC80_URB	0.009201	0.26759	35370	chr6	112137404	0.0241647	7.83461e-06	5403	6	112137404	GCST90277415	2	1	TRUE
44	rs964184	C	G	C	G	-0.210452	-0.0138	0.848991	FALSE	TRUE	TRUE	3234_23_CCDC80_URB	0.012415	0.266312	35377	chr11	116778201	0.026272	1.38406e-15	5403	11	116778201	GCST90277415	2	1	FALSE
45	rs102275	C	T	C	T	-0.159446	0.0212	0.410377	FALSE	FALSE	FALSE	6605_17_IGFALS_IGFALS	0.008321	0.010841	35367	chr11	61790331	0.0196487	5.95425e-16	5403	11	61790331	GCST90277415	2	1	TRUE
46	rs111473971	A	G	A	G	0.137662	-0.024	0.120696	FALSE	FALSE	FALSE	6605_17_IGFALS_IGFALS	0.013904	0.084317	35354	chr19	21652047	0.0301588	5.11112e-06	5403	19	21652047	GCST90277415	2	1	TRUE
47	rs117926062	T	G	T	G	-0.454315	0.0833	0.00880125	FALSE	FALSE	FALSE	6605_17_IGFALS_IGFALS	0.037693	0.027108	35371	chr6	138930517	0.101433	7.65097e-06	5403	6	138930517	GCST90277415	2	1	TRUE
48	rs1258712	T	G	T	G	0.179876	0.0156	0.931291	FALSE	FALSE	FALSE	6605_17_IGFALS_IGFALS	0.01687	0.355102	35356	chr12	31313616	0.0390006	4.07746e-06	5403	12	31313616	GCST90277415	2	1	TRUE
49	rs1260326	C	T	C	T	-0.119307	-0.0331	0.650878	FALSE	FALSE	FALSE	6605_17_IGFALS_IGFALS	0.008638	0.0001271	35373	chr2	27508073	0.020014	2.65937e-09	5403	2	27508073	GCST90277415	2	1	TRUE
50	rs12700064	A	G	A	G	0.158017	-0.002	0.900243	FALSE	FALSE	FALSE	6605_17_IGFALS_IGFALS	0.013829	0.88501	35375	chr7	19617082	0.0332937	2.12452e-06	5403	7	19617082	GCST90277415	2	1	TRUE
51	rs141765432	T	G	T	G	-0.262605	-0.0117	0.0353416	FALSE	FALSE	FALSE	6605_17_IGFALS_IGFALS	0.039664	0.768011	35355	chr14	76516128	0.0532405	8.3579e-07	5403	14	76516128	GCST90277415	2	1	TRUE
52	rs145956593	A	G	A	G	-0.122294	-0.003	0.141292	FALSE	FALSE	FALSE	6605_17_IGFALS_IGFALS	0.011151	0.7879	35357	chr11	88458623	0.0275161	8.9742e-06	5403	11	88458623	GCST90277415	2	1	TRUE
53	rs150578762	A	G	A	G	0.155108	0.007	0.0942658	FALSE	FALSE	FALSE	6605_17_IGFALS_IGFALS	0.017003	0.680571	35377	chr22	28083968	0.0329203	2.5171e-06	5403	22	28083968	GCST90277415	2	1	TRUE
54	rs15285	T	C	T	C	-0.123238	-0.0043	0.261072	FALSE	FALSE	FALSE	6605_17_IGFALS_IGFALS	0.009001	0.632832	35368	chr8	19967156	0.0219238	1.98902e-08	5403	8	19967156	GCST90277415	2	1	TRUE
55	rs187429064	G	A	G	A	-0.215689	-0.0615	0.0535314	FALSE	FALSE	FALSE	6605_17_IGFALS_IGFALS	0.052383	0.240379	35353	chr19	19269704	0.0449055	1.60185e-06	5403	19	19269704	GCST90277415	2	1	TRUE
56	rs1883350	C	T	C	T	0.114462	-0.0327	0.39119	FALSE	FALSE	FALSE	6605_17_IGFALS_IGFALS	0.00914	0.0003466	35372	chr22	43932163	0.019659	6.12587e-09	5403	22	43932163	GCST90277415	2	1	TRUE
57	rs3011337	G	A	G	A	0.099104	-0.0073	0.673295	FALSE	FALSE	FALSE	6605_17_IGFALS_IGFALS	0.008561	0.393845	35380	chr10	120774281	0.0207589	1.85071e-06	5403	10	120774281	GCST90277415	2	1	TRUE
58	rs34621709	A	C	A	C	0.111496	0.0029	0.18474	FALSE	FALSE	FALSE	6605_17_IGFALS_IGFALS	0.011423	0.7996	35352	chr1	220806736	0.0249667	8.13221e-06	5403	1	220806736	GCST90277415	2	1	TRUE
59	rs371927	A	G	A	G	-0.177294	0.0081	0.914919	FALSE	FALSE	FALSE	6605_17_IGFALS_IGFALS	0.013489	0.548167	35370	chr20	44634395	0.0368155	1.50497e-06	5403	20	44634395	GCST90277415	2	1	TRUE
60	rs445925	A	G	A	G	0.220749	0.0025	0.0774371	FALSE	FALSE	FALSE	6605_17_IGFALS_IGFALS	0.014593	0.863978	35368	chr19	44912383	0.0354449	5.07593e-10	5403	19	44912383	GCST90277415	2	1	TRUE
61	rs592586	G	A	G	A	0.0911776	-0.0015	0.594684	FALSE	FALSE	FALSE	6605_17_IGFALS_IGFALS	0.008385	0.858026	35345	chr1	109650768	0.0194751	2.91145e-06	5403	1	109650768	GCST90277415	2	1	TRUE
62	rs62209231	C	T	C	T	0.0879061	0.0017	0.353942	FALSE	FALSE	FALSE	6605_17_IGFALS_IGFALS	0.009136	0.852386	35381	chr20	13843242	0.0197898	9.08246e-06	5403	20	13843242	GCST90277415	2	1	TRUE
63	rs67076780	T	C	T	C	-0.282473	0.0239	0.0238689	FALSE	FALSE	FALSE	6605_17_IGFALS_IGFALS	0.020569	0.245269	34994	chr18	78936828	0.0627095	6.78798e-06	5403	18	78936828	GCST90277415	2	1	TRUE
64	rs75214296	G	A	G	A	0.12509	-0.0045	0.138223	FALSE	FALSE	FALSE	6605_17_IGFALS_IGFALS	0.012486	0.718537	35357	chr12	43836589	0.0275958	5.93685e-06	5403	12	43836589	GCST90277415	2	1	TRUE
65	rs7764213	C	T	C	T	0.108108	-0.0019	0.195241	FALSE	FALSE	FALSE	6605_17_IGFALS_IGFALS	0.009181	0.836042	35370	chr6	112137404	0.0241647	7.83461e-06	5403	6	112137404	GCST90277415	2	1	TRUE
66	rs964184	C	G	C	G	-0.210452	-0.0105	0.848991	FALSE	TRUE	TRUE	6605_17_IGFALS_IGFALS	0.012362	0.395655	35377	chr11	116778201	0.026272	1.38406e-15	5403	11	116778201	GCST90277415	2	1	FALSE

## Sheet: Sheet9
The MR results between lipid species and species
	id.exposure	id.outcome	method	nsnp	b	se_mr	pval_mr	lo_ci	up_ci	or	or_lci95	or_uci95	egger_intercept	se_pleio	pval_pleio	Q_MR_Egger	Q_df_MR_Egger	Q_pval_MR_Egger	Q_ivw	Q_df_ivw	Q_pval_ivw
1	GCST90277238	3004_67_PDCD1LG2_PD_L2	Inverse variance weighted	14	-0.0647835	0.0219818	0.00320732	-0.107868	-0.0216991	0.93727	0.897746	0.978535	-0.00135404	0.00465737	0.776221	9.50549	12	0.659255	9.59002	13	0.727067
2	GCST90277238	3004_67_PDCD1LG2_PD_L2	Weighted median	14	-0.0565241	0.0337649	0.0941206	-0.122703	0.00965504	0.945044	0.884526	1.0097	-0.00135404	0.00465737	0.776221	9.50549	12	0.659255	9.59002	13	0.727067
3	GCST90277238	3004_67_PDCD1LG2_PD_L2	Maximum likelihood	14	-0.064076	0.0227492	0.00485305	-0.108664	-0.0194876	0.937934	0.897031	0.980701	-0.00135404	0.00465737	0.776221	9.50549	12	0.659255	9.59002	13	0.727067
4	GCST90277238	3004_67_PDCD1LG2_PD_L2	MR Egger	14	-0.056169	0.0368939	0.153804	-0.128481	0.016143	0.945379	0.87943	1.01627	-0.00135404	0.00465737	0.776221	9.50549	12	0.659255	9.59002	13	0.727067
5	GCST90277238	3234_23_CCDC80_URB	Inverse variance weighted	14	-0.0211863	0.0268146	0.429468	-0.0737429	0.0313704	0.979037	0.92891	1.03187	-0.00353792	0.00582075	0.554641	18.3455	12	0.105596	18.9103	13	0.125912
6	GCST90277238	3234_23_CCDC80_URB	Weighted median	14	0.00519726	0.0349855	0.881905	-0.0633744	0.0737689	1.00521	0.938592	1.07656	-0.00353792	0.00582075	0.554641	18.3455	12	0.105596	18.9103	13	0.125912
7	GCST90277238	3234_23_CCDC80_URB	Maximum likelihood	14	-0.0232499	0.0236827	0.326234	-0.069668	0.0231681	0.977018	0.932703	1.02344	-0.00353792	0.00582075	0.554641	18.3455	12	0.105596	18.9103	13	0.125912
8	GCST90277238	3234_23_CCDC80_URB	MR Egger	14	0.00140217	0.0462256	0.9763	-0.0892001	0.0920044	1.0014	0.914663	1.09637	-0.00353792	0.00582075	0.554641	18.3455	12	0.105596	18.9103	13	0.125912
9	GCST90277238	6605_17_IGFALS_IGFALS	Inverse variance weighted	14	0.0249282	0.0401012	0.534183	-0.0536701	0.103527	1.02524	0.947745	1.10908	-0.00154398	0.00883784	0.864227	42.3555	12	2.90151e-05	42.4633	13	5.49979e-05
10	GCST90277238	6605_17_IGFALS_IGFALS	Weighted median	14	0.0200171	0.0348683	0.565916	-0.0483249	0.088359	1.02022	0.952824	1.09238	-0.00154398	0.00883784	0.864227	42.3555	12	2.90151e-05	42.4633	13	5.49979e-05
11	GCST90277238	6605_17_IGFALS_IGFALS	Maximum likelihood	14	0.0269518	0.0232686	0.246744	-0.0186545	0.0725582	1.02732	0.981518	1.07526	-0.00154398	0.00883784	0.864227	42.3555	12	2.90151e-05	42.4633	13	5.49979e-05
12	GCST90277238	6605_17_IGFALS_IGFALS	MR Egger	14	0.0347069	0.069791	0.627965	-0.102083	0.171497	1.03532	0.902954	1.18708	-0.00154398	0.00883784	0.864227	42.3555	12	2.90151e-05	42.4633	13	5.49979e-05
	id.exposure	id.outcome	method	nsnp	b	se_mr	pval_mr	lo_ci	up_ci	or	or_lci95	or_uci95	egger_intercept	se_pleio	pval_pleio	Q_MR_Egger	Q_df_MR_Egger	Q_pval_MR_Egger	Q_ivw	Q_df_ivw	Q_pval_ivw
1	GCST90277242	3004_67_PDCD1LG2_PD_L2	Inverse variance weighted	21	0.0274588	0.0355226	0.439525	-0.0421655	0.0970831	1.02784	0.958711	1.10195	0.00369764	0.0101577	0.71986	56.1818	19	1.52962e-05	56.5736	20	2.38163e-05
2	GCST90277242	3004_67_PDCD1LG2_PD_L2	Weighted median	21	-0.0139943	0.033539	0.676492	-0.0797308	0.0517421	0.986103	0.923365	1.0531	0.00369764	0.0101577	0.71986	56.1818	19	1.52962e-05	56.5736	20	2.38163e-05
3	GCST90277242	3004_67_PDCD1LG2_PD_L2	Maximum likelihood	21	0.0294295	0.0223947	0.188804	-0.0144642	0.0733232	1.02987	0.98564	1.07608	0.00369764	0.0101577	0.71986	56.1818	19	1.52962e-05	56.5736	20	2.38163e-05
4	GCST90277242	3004_67_PDCD1LG2_PD_L2	MR Egger	21	0.000344801	0.0828671	0.996723	-0.162075	0.162764	1.00034	0.850378	1.17676	0.00369764	0.0101577	0.71986	56.1818	19	1.52962e-05	56.5736	20	2.38163e-05
5	GCST90277242	3234_23_CCDC80_URB	Inverse variance weighted	21	0.0379783	0.0283935	0.181037	-0.017673	0.0936295	1.03871	0.982482	1.09815	-0.00266343	0.00811147	0.746235	35.2823	19	0.0129122	35.4825	20	0.0176798
6	GCST90277242	3234_23_CCDC80_URB	Weighted median	21	0.0650364	0.0321565	0.0431255	0.00200953	0.128063	1.0672	1.00201	1.13662	-0.00266343	0.00811147	0.746235	35.2823	19	0.0129122	35.4825	20	0.0176798
7	GCST90277242	3234_23_CCDC80_URB	Maximum likelihood	21	0.0395281	0.0219913	0.0722647	-0.00357475	0.082631	1.04032	0.996432	1.08614	-0.00266343	0.00811147	0.746235	35.2823	19	0.0129122	35.4825	20	0.0176798
8	GCST90277242	3234_23_CCDC80_URB	MR Egger	21	0.0575773	0.066382	0.396566	-0.0725314	0.187686	1.05927	0.930037	1.20645	-0.00266343	0.00811147	0.746235	35.2823	19	0.0129122	35.4825	20	0.0176798
9	GCST90277242	6605_17_IGFALS_IGFALS	Inverse variance weighted	21	-0.0334325	0.0282439	0.23653	-0.0887905	0.0219256	0.96712	0.915037	1.02217	0.00145397	0.00809738	0.859398	34.8481	19	0.0145668	34.9072	20	0.0206041
10	GCST90277242	6605_17_IGFALS_IGFALS	Weighted median	21	-0.0269114	0.0311506	0.387636	-0.0879666	0.0341438	0.973447	0.915791	1.03473	0.00145397	0.00809738	0.859398	34.8481	19	0.0145668	34.9072	20	0.0206041
11	GCST90277242	6605_17_IGFALS_IGFALS	Maximum likelihood	21	-0.0347233	0.0222053	0.117878	-0.0782457	0.00879898	0.965873	0.924737	1.00884	0.00145397	0.00809738	0.859398	34.8481	19	0.0145668	34.9072	20	0.0206041
12	GCST90277242	6605_17_IGFALS_IGFALS	MR Egger	21	-0.0440871	0.0660242	0.512328	-0.173494	0.0853202	0.956871	0.840722	1.08907	0.00145397	0.00809738	0.859398	34.8481	19	0.0145668	34.9072	20	0.0206041
	id.exposure	id.outcome	method	nsnp	b	se_mr	pval_mr	lo_ci	up_ci	or	or_lci95	or_uci95	egger_intercept	se_pleio	pval_pleio	Q_MR_Egger	Q_df_MR_Egger	Q_pval_MR_Egger	Q_ivw	Q_df_ivw	Q_pval_ivw
1	GCST90277244	3004_67_PDCD1LG2_PD_L2	Inverse variance weighted	24	-0.0224845	0.0270826	0.406414	-0.0755664	0.0305974	0.977766	0.927218	1.03107	0.0152606	0.00908525	0.10716	37.8536	22	0.0190269	42.7082	23	0.00749853
2	GCST90277244	3004_67_PDCD1LG2_PD_L2	Weighted median	24	-0.0270383	0.0312733	0.387268	-0.088334	0.0342573	0.973324	0.915455	1.03485	0.0152606	0.00908525	0.10716	37.8536	22	0.0190269	42.7082	23	0.00749853
3	GCST90277244	3004_67_PDCD1LG2_PD_L2	Maximum likelihood	24	-0.0229088	0.0205235	0.264329	-0.0631349	0.0173174	0.977352	0.938817	1.01747	0.0152606	0.00908525	0.10716	37.8536	22	0.0190269	42.7082	23	0.00749853
4	GCST90277244	3004_67_PDCD1LG2_PD_L2	MR Egger	24	-0.152697	0.081787	0.0752834	-0.313	0.00760528	0.85839	0.73125	1.00763	0.0152606	0.00908525	0.10716	37.8536	22	0.0190269	42.7082	23	0.00749853
5	GCST90277244	3234_23_CCDC80_URB	Inverse variance weighted	24	0.00245291	0.025243	0.92259	-0.0470233	0.0519291	1.00246	0.954065	1.0533	-0.00824508	0.00882958	0.360543	34.6631	22	0.0420003	36.037	23	0.0408957
6	GCST90277244	3234_23_CCDC80_URB	Weighted median	24	0.0144201	0.0293315	0.622985	-0.0430697	0.0719099	1.01452	0.957845	1.07456	-0.00824508	0.00882958	0.360543	34.6631	22	0.0420003	36.037	23	0.0408957
7	GCST90277244	3234_23_CCDC80_URB	Maximum likelihood	24	0.00251763	0.0207384	0.903375	-0.0381296	0.0431649	1.00252	0.962588	1.04411	-0.00824508	0.00882958	0.360543	34.6631	22	0.0420003	36.037	23	0.0408957
8	GCST90277244	3234_23_CCDC80_URB	MR Egger	24	0.0727429	0.0794152	0.369609	-0.082911	0.228397	1.07545	0.920433	1.25658	-0.00824508	0.00882958	0.360543	34.6631	22	0.0420003	36.037	23	0.0408957
[truncated: 121 more rows]
